# Supplementary material for: CircRNAome of Childhood Acute Lymphoblastic Leukemia: Deciphering Subtype-Specific Expression Profiles and Involvement in TCF3::PBX1 ALL
Source: MDPI journal article supplement (doi:10.3390/ijms25031477), 2024-01-25
Supplement: s1 [file s1]

### A) B-cell Controls

| Input Sample      | earlyB | proB  | preB  | ImmatureB | P-value | Correlation |
|-------------------|--------|-------|-------|-----------|---------|-------------|
| cord_27844        | 0      | 0.128 | 0     | 0.872     | 0.000   | 0.867       |
| cord_27846        | 0      | 0.106 | 0     | 0.894     | 0.000   | 0.884       |
| cord_27849        | 0      | 0.054 | 0     | 0.946     | 0.000   | 0.909       |
| ALLMIRC007-Bcells | 0      | 0.004 | 0.116 | 0.880     | 0.000   | 0.954       |
| ALLMIRC011-Bcells | 0      | 0.022 | 0     | 0.978     | 0.000   | 0.956       |
| ALLMIRC012-Bcells | 0      | 0.026 | 0     | 0.974     | 0.000   | 0.972       |
| ALLMIRC014-Bcells | 0      | 0.01  | 0     | 0.990     | 0.000   | 0.983       |

### B) Leukemia samples

| Input Sample   | earlyB | proB  | preB  | ImmatureB | P-value | Correlation |
|----------------|--------|-------|-------|-----------|---------|-------------|
| DUX4 D1        | 0.024  | 0.896 | 0     | 0.080     | 0.000   | 0.746       |
| DUX4 D2        | 0      | 0.949 | 0.051 | 0.000     | 0.000   | 0.789       |
| DUX4 D3        | 0.056  | 0.848 | 0     | 0.096     | 0.000   | 0.914       |
| ETV6::RUNX1 D1 | 0.003  | 0.947 | 0     | 0.049     | 0.000   | 0.665       |
| ETV6::RUNX1 D2 | 0      | 0.957 | 0     | 0.043     | 0.000   | 0.734       |
| ETV6::RUNX1 D3 | 0.099  | 0.806 | 0.095 | 0.000     | 0.000   | 0.858       |
| HHD D1         | 0.147  | 0.63  | 0.13  | 0.093     | 0.000   | 0.911       |
| HHD D2         | 0.037  | 0.956 | 0     | 0.006     | 0.000   | 0.927       |
| HHD D3         | 0      | 0.94  | 0     | 0.060     | 0.000   | 0.945       |
| MLL D1         | 0.092  | 0.889 | 0     | 0.019     | 0.000   | 0.884       |
| MLL D2         | 0.043  | 0.921 | 0     | 0.036     | 0.010   | 0.526       |
| MLL D3         | 0.077  | 0.883 | 0     | 0.040     | 0.000   | 0.764       |
| TCF3::PBX1 D1  | 0.012  | 0.881 | 0.091 | 0.016     | 0.000   | 0.886       |
| TCF3::PBX1 D2  | 0.016  | 0.92  | 0.064 | 0.000     | 0.000   | 0.777       |
| TCF3::PBX1 D3  | 0      | 0.981 | 0     | 0.019     | 0.000   | 0.872       |
| Phi-like D1    | 0.01   | 0.882 | 0.077 | 0.032     | 0.000   | 0.957       |
| Phi-like D2    | 0.031  | 0.898 | 0     | 0.070     | 0.000   | 0.856       |
| Phi-like D3    | 0.104  | 0.845 | 0     | 0.051     | 0.000   | 0.827       |

**Figure S1:** Predominant hematopoietic cell signal within each bulk transcriptome compared to early B (CD34+/CD19-/IgM-), pro-B (CD34-/CD19+/IgM-), preB (CD34+/CD19+/IgM-) and immature cells (CD34-/CD19+/IgM+) in **A)** controls and **B)** leukemia samples representing six subtypes of B-ALL from the discovery cohort.

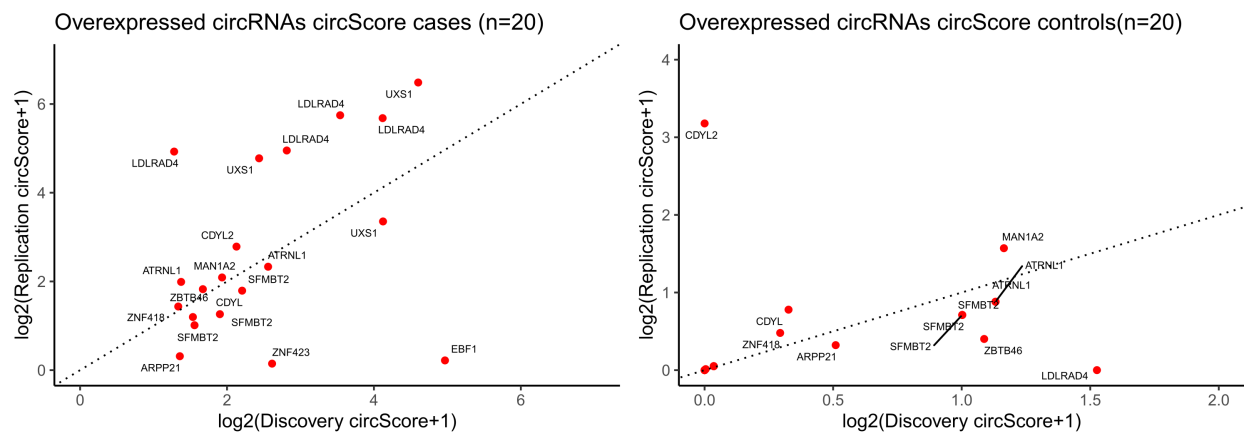

**Figure S2:** CIRCscores of the top scoring circRNAs (n=20) that are overexpressed in subtypes. Right: Mean CIRCscores of cases in the discovery and replication cohorts. Left: Mean CIRCscores of controls in the discovery and replication.



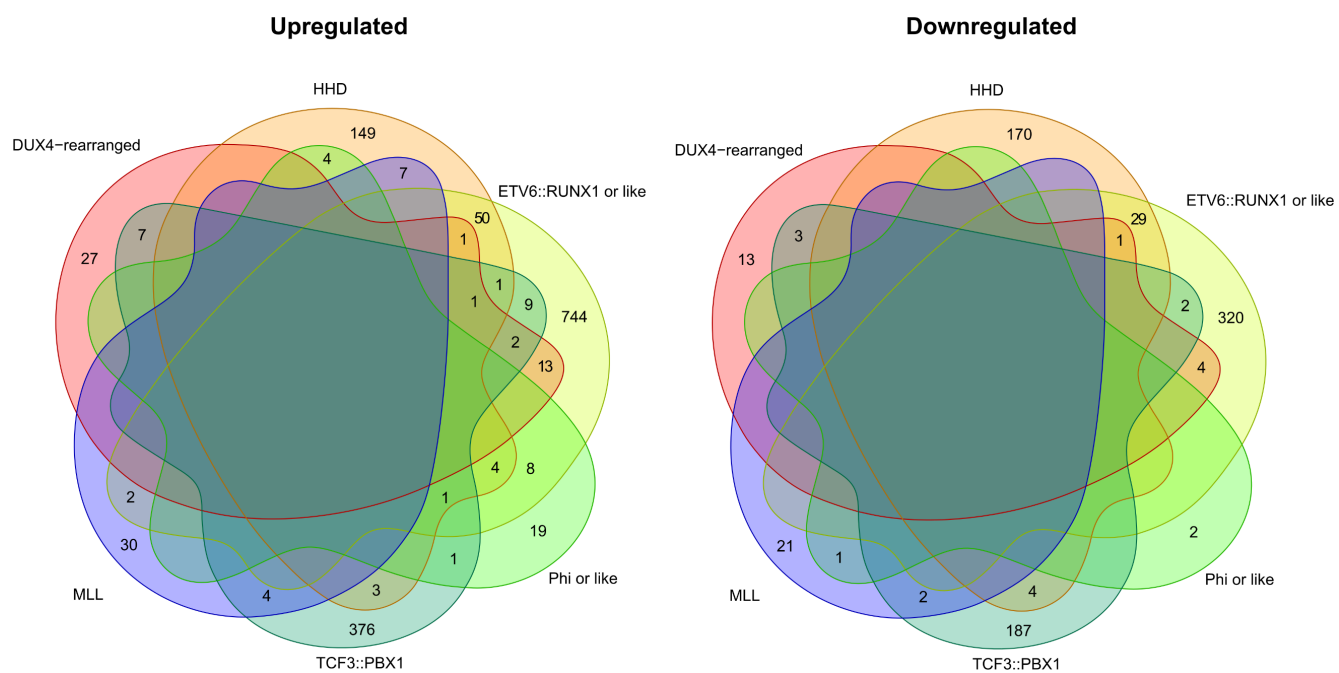

**Figure S4:** Venn diagram of overexpressed and downregulated circRNAs for each subtype compared to the rest of the subtypes in the discovery cohort

## Discovery

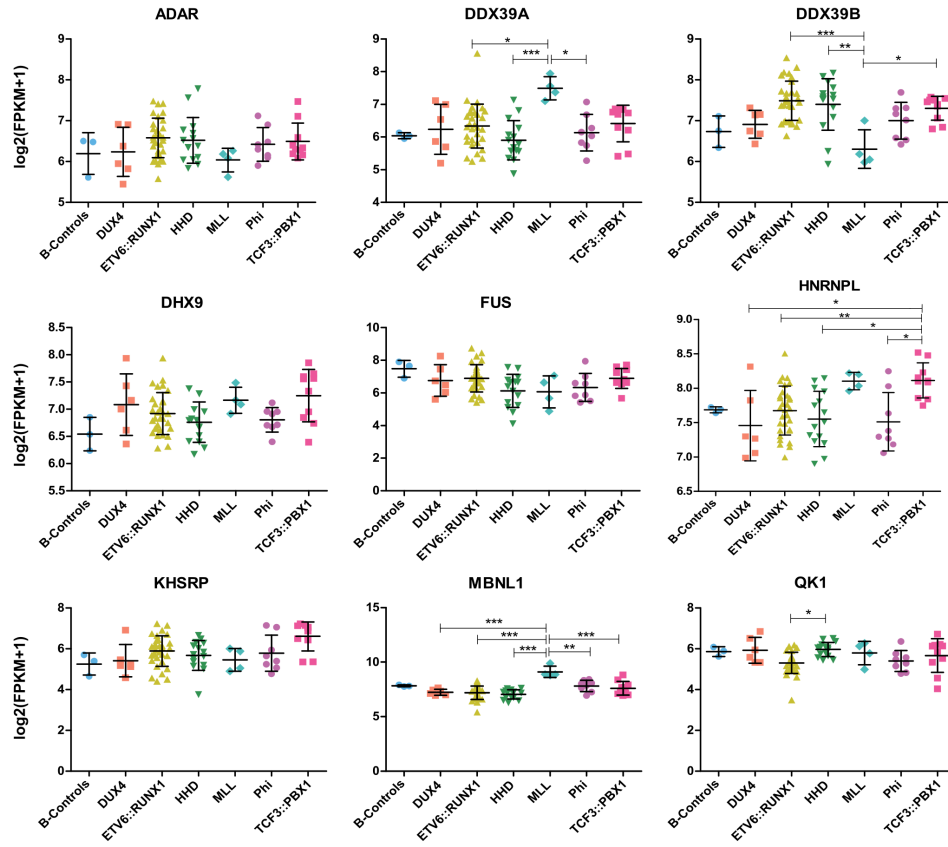

## Replication

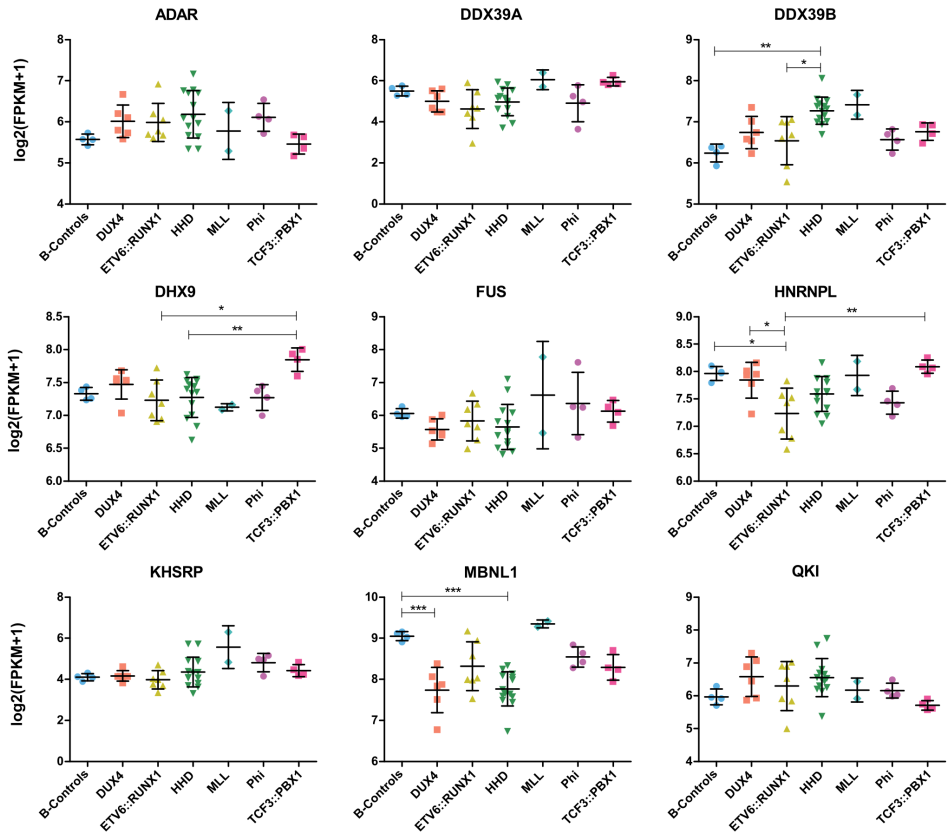

**Figure S5:** Biogenesis of circRNAs. FPKM values for 9 additional genes involved in circRNAs biogenesis (complement to Figure 3A). Values from the discovery and replication cohorts were extracted from transcriptome data and log transformed. Only significant p-values ( $<0.05$ ) are indicated (Anova test, corrected for multiple testing with Bonferroni).

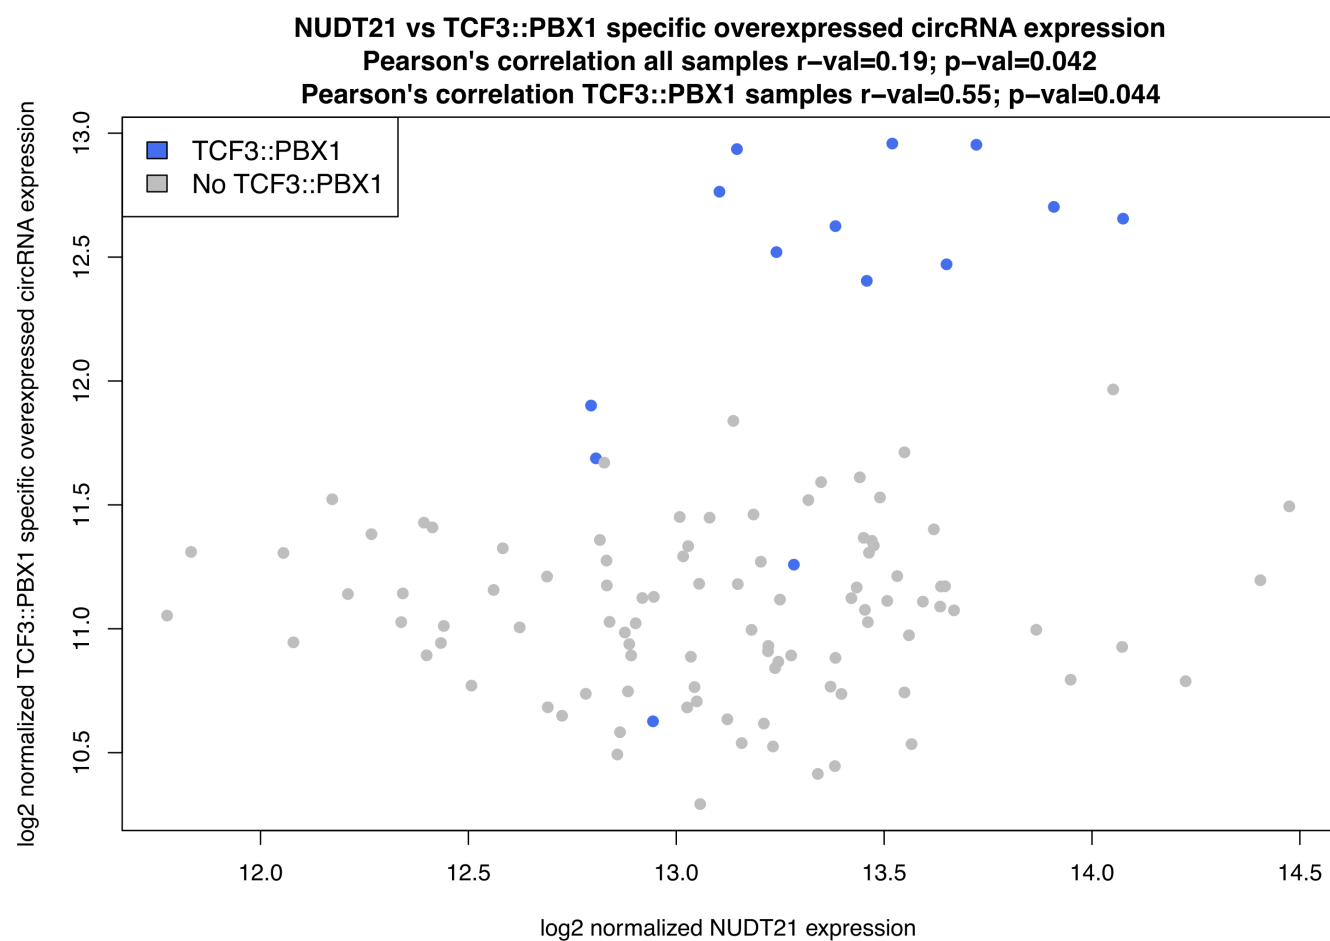

**Figure S6:** Correlation analysis showing global expression of upregulated candidates identified in TCF3::PBX1 patients (82 circRNAs) and NUDT21 expression.

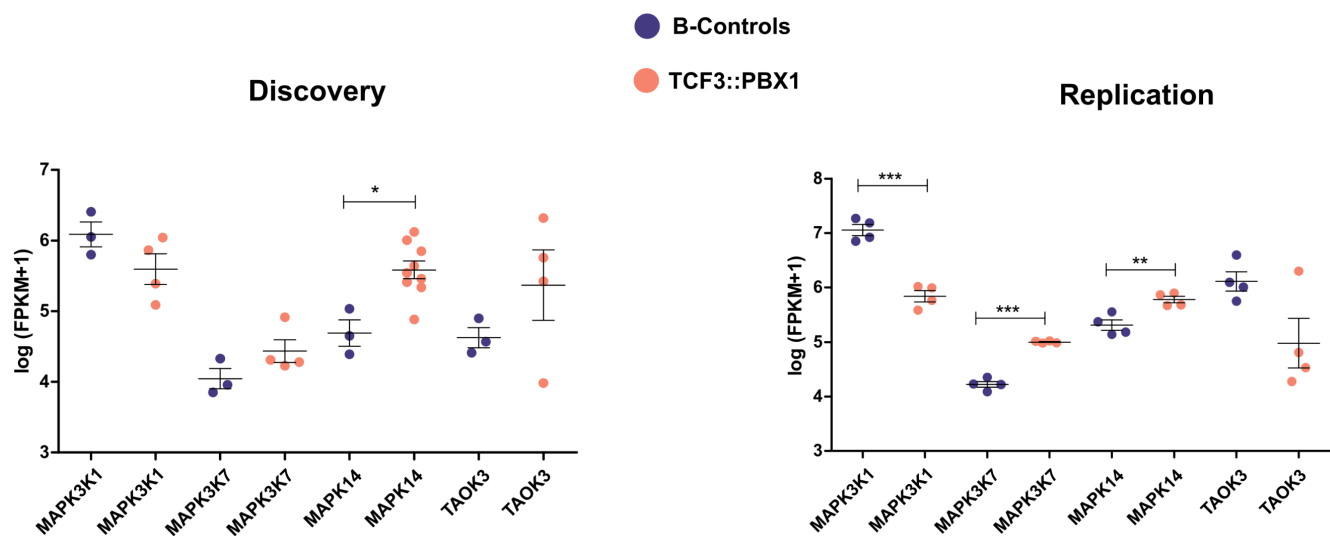

**Figure S7:** Expression analysis of p38 MAPK signaling pathway genes. FPKM values of *MAKP14* (p38), *TAOK3*, *MAP3K1* and *MAP3K7* in the discovery and validation cohorts were extracted from the transcriptome data and log transformed. Only significant p-values (<0.05) are indicated (t-test).
