# Supplementary material for: CircRNAome of Childhood Acute Lymphoblastic Leukemia: Deciphering Subtype-Specific Expression Profiles and Involvement in TCF3::PBX1 ALL
Source: Int J Mol Sci. 2024 Jan 25;25(3):1477. doi: 10.3390/ijms25031477 (PMC10855129; doi:10.3390/ijms25031477)
Supplement: Supplementary file 1 [file ijms-25-01477-s001.zip]

Archive with 4 entries (4 files):
- SuplementraryFigures_circRNAs_B_ALL_20240115.pdf
- __MACOSX/._SuplementraryFigures_circRNAs_B_ALL_20240115.pdf
- SupplementaryTables_circRNAs_B_ALL_20240122.xlsx
- __MACOSX/._SupplementaryTables_circRNAs_B_ALL_20240122.xlsx
