# Supplementary material for: CircRNAome of Childhood Acute Lymphoblastic Leukemia: Deciphering Subtype-Specific Expression Profiles and Involvement in TCF3::PBX1 ALL
Source: Int J Mol Sci. 2024 Jan 25;25(3):1477. doi: 10.3390/ijms25031477 (PMC10855129; doi:10.3390/ijms25031477)
Supplement: Supplementary file 1 [file ijms-25-01477-s001.zip › SupplementaryTables_circRNAs_B_ALL_20240122.xlsx]

## Sheet: Table S1_circRNAs_overexpressed
circRNA	chr	start	stop	logfc.discovery	padj.discovery	logfc.gene.discovery	padj.gene.discovery	symbol	gene_name	discovery_mean_norm_cases	discovery_mean_norm_controls	discovery_mean_circscore_cases	discovery_mean_circscore_controls	REH.juncNorm	NALM6.juncNorm	RS411.juncNorm	SEM.juncNorm	697.juncNorm	GM12878.juncNorm	logfc.replication	padj.replication	logfc.gene.replication	padj.gene.replication	replication_mean_norm_cases	replication_mean_norm_controls	replication_mean_circscore_cases	replication_mean_circscore_controls	strand	known_name	subtype
2:215632205-215646233	chr2	215632205	215646233	-4.65143	0.000828239	-2.46393	3.54e-06	BARD1	ENSG00000138376	62.251	2.74	1.029	0.073	9.0326	6.3462	17.4095	21.1837	15.4995	6.1223	-1.65708	0.00992318	-1.84135	1.70491e-08	107.213	33.952	0.773	0.423	-	hsa_circ_0001098	DUX4-rearranged
11:36248634-36248980	chr11	36248634	36248980	-6.39169	0.00141935	-8.36002	6.85e-24	LDLRAD3	ENSG00000179241	40.698	0	1.297	0	0	3.3111	0.3744	2.0836	3.5226	0.7653	-3.77861	2.43315e-07	-5.54482	8.40468e-57	41.981	3.327	0.903	2.371	+	hsa_circ_0006988	DUX4-rearranged
10:34558584-34573173	chr10	34558584	34573173	-5.9206	0.00745742	-6.65565	3e-15	PARD3	ENSG00000148498	28.205	0	0.437	0	2.7793	2.7592	7.488	3.82	11.9769	0.7653	-1.35122	0.00878803	-2.07255	9.011e-13	87.306	34.491	0.504	0.794	-	hsa_circ_0018168	DUX4-rearranged
4:103225473-103236987	chr4	103225473	103236987	-5.7098	0.00745742	-2.01303	3.76e-05	SLC39A8	ENSG00000138821	24.802	0	0.385	0	2.316	3.0352	4.8672	5.3249	7.5149	3.4438	-1.83842	0.00352188	-1.61162	1.57597e-07	69.121	19.445	0.438	0.277	-	hsa_circ_0002782	DUX4-rearranged
10:116879948-116889297	chr10	116879948	116889297	-4.07004	0.0124316	-5.63038	3.37e-12	ATRNL1	ENSG00000107518	73.94	4.763	1.594	1.191	3.0109	11.8647	125.049	42.599	3.5226	2.2959	-5.98226	8.02824e-19	-5.50185	1.92584e-13	326.807	5.175	2.971	0.842	+	hsa_circ_0020093	DUX4-rearranged
5:143042459-143052262	chr5	143042459	143052262	-3.00412	0.0189804	-5.73376	9.13e-17	CTB-57H20.1	ENSG00000249881	39.813	5.019	1.035	1.148	1.158	0.8278	0.936	0.5788	0.7045	0	-6.29405	3.70007e-09	-6.58903	1.25964e-38	61.742	0.797	0.533	0.342	NA	NA	DUX4-rearranged
6:4891946-4892613	chr6	4891946	4892613	-2.71972	0.0202158	-0.723918	0.248727	CDYL	ENSG00000153046	143.852	22.229	2.185	0.254	15.0543	31.4552	32.6663	33.8014	51.4302	92.217	-2.1277	8.93337e-11	-0.753408	0.000538407	406.082	93.163	2.545	0.716	+	hsa_circ_0008285	DUX4-rearranged
6:22020567-22020771	chr6	22020567	22020771	-5.6377	0.0225333	-5.47905	6.27e-09	CASC15	ENSG00000272168	23.576	0	0.62	0	4.1689	0	0	0.1158	7.9846	0	-5.90288	0.00415395	-6.70415	2.2325e-87	40.532	0.722	0.236	0.243	+	hsa_circ_0075828	DUX4-rearranged
10:7285519-7327916	chr10	7285519	7327916	-3.08832	0.0292858	-0.285115	0.727133	SFMBT2	ENSG00000198879	40.584	4.688	1.059	0.096	5.5585	12.9684	4.3056	0.5788	9.8633	19.1322	-2.11579	0.00139418	-1.02469	0.02156	60.778	14.164	0.794	0.338	-	hsa_circ_0017636	DUX4-rearranged
5:67522117-67522837	chr5	67522117	67522837	-5.33009	0.0292858	-1.59329	0.000251023	PIK3R1	ENSG00000145675	19.279	0	0.06	0	3.7057	1.1037	1.404	0.9261	0.4697	0.3826	-3.10306	0.0447465	-2.28192	1.41964e-10	40.946	4.782	0.033	0.019	+	hsa_circ_0006411	DUX4-rearranged
18:14769341-14772227	chr18	14769341	14772227	-5.4054	0.0483616	-8.85669	3.22e-31	ANKRD30B	ENSG00000180777	20.672	0	0.166	0	0	1.3796	0	0	0	0	-7.62464	0.00106406	-10.5536	1.46373e-26	29.238	0	0.064	0	NA	NA	DUX4-rearranged
7:100410368-100410830	chr7	100410368	100410830	-4.19725	0.0483616	-3.13205	2.1e-14	EPHB4	ENSG00000196411	30.988	2.023	1.009	0.161	14.1279	5.2425	3.0888	1.2733	11.0375	0	-6.96931	1.49939e-07	-3.90881	6.23652e-54	30.498	0.239	1.047	0.097	-	hsa_circ_0001730	DUX4-rearranged
8:18622958-18662408	chr8	18622958	18662408	-7.30642	2.11e-06	-3.597	2.65e-42	PSD3	ENSG00000156011	147.673	1.012	0.685	0.023	5.5585	1.1037	6.6456	7.64	7.5149	0	-5.45873	0.000723432	-4.12727	6.14899e-10	199.399	4.562	0.533	0.134	-	hsa_circ_0002111	ETV6-RUNX1_or_like
20:61488746-61490878	chr20	61488746	61490878	-7.23993	2.11e-05	-5.25075	2.88e-36	TCFL5	ENSG00000101190	72.406	0	0.148	0	2.0844	2.4833	0.3744	0.8103	0.4697	1.9132	-3.4784	0.0452648	-4.56639	6.51078e-27	74.671	6.673	0.073	0.108	-	hsa_circ_0006458	ETV6-RUNX1_or_like
4:22403053-22404422	chr4	22403053	22404422	-4.74565	0.000265942	-4.0085	1.64e-12	GPR125	ENSG00000152990	88.619	3.291	0.658	0.352	13.8963	1.9315	3.0888	2.894	0.2348	0.7653	-5.5219	0.00247553	-6.65845	5.24065e-26	54.528	1.197	0.207	0.512	-	hsa_circ_0002785	ETV6-RUNX1_or_like
8:18725183-18730243	chr8	18725183	18730243	-5.76914	0.00148493	-3.597	2.65e-42	PSD3	ENSG00000156011	25.942	0	0.113	0	1.8528	0.2759	4.1184	7.8716	6.1059	0	-4.95167	0.0134903	-4.12727	6.14899e-10	61.288	2.025	0.166	0.061	NA	NA	ETV6-RUNX1_or_like
17:47118739-47119739	chr17	47118739	47119739	-5.90275	0.0020589	-8.89131	1.03e-82	IGF2BP1	ENSG00000159217	28.549	0	0.135	0	5.3269	0	0	0	0	0.7653	-8.16098	0.000496539	-12.4563	2.58719e-32	42.27	0	0.285	0	+	hsa_circ_0044396	ETV6-RUNX1_or_like
7:3658711-3681737	chr7	3658711	3681737	-5.20953	0.00969026	-5.45497	4.23e-27	SDK1	ENSG00000146555	17.607	0	0.866	0	0.9264	0	0	0	4.462	0	-3.99433	0.0375435	-4.80587	1.24627e-24	20.757	1.275	1.265	1.643	NA	NA	ETV6-RUNX1_or_like
10:7318853-7327916	chr10	7318853	7327916	-1.80058	0.0122338	-0.346724	0.441009	SFMBT2	ENSG00000198879	234.387	67.926	3.613	1.003	19.4548	22.0738	15.6311	4.3988	16.9086	44.7693	-3.31729	0.0097792	-1.74623	0.00294537	248.593	24.95	2.462	0.637	-	hsa_circ_0000211	ETV6-RUNX1_or_like
5:143042459-143052262	chr5	143042459	143052262	-3.20874	0.0122338	-6.33283	4.69e-23	CTB-57H20.1	ENSG00000249881	46.193	5.019	0.682	1.148	1.158	0.8278	0.936	0.5788	0.7045	0	-5.81377	0.00202508	-6.56267	3.51258e-21	44.614	0.797	0.436	0.342	NA	NA	ETV6-RUNX1_or_like
16:49764681-49823457	chr16	49764681	49823457	-5.20543	0.0125546	-7.98781	5.47e-53	ZNF423	ENSG00000102935	18.075	0	5.12	0	0.2316	0	0.0936	1.8521	2.3484	0	-6.51124	0.018709	-12.9141	1.61066e-25	13.468	0	0.107	0	NA	NA	ETV6-RUNX1_or_like
20:61485367-61488990	chr20	61485367	61488990	-5.34276	0.0135015	-5.25075	2.88e-36	TCFL5	ENSG00000101190	37.86	1.012	0.083	0.056	0.4632	0.2759	0	0.2315	0.4697	0	-4.17906	0.0291318	-4.56639	6.51078e-27	58.625	3.223	0.046	0.053	-	hsa_circ_0004597	ETV6-RUNX1_or_like
3:154832782-154836600	chr3	154832782	154836600	-5.14623	0.0146678	-5.35457	2.56e-26	MME	ENSG00000196549	16.91	0	0.007	0	0.4632	2.4833	0	0	0	0	-6.04243	0.01545	-6.11816	1.08526e-21	15.993	0.211	0.005	0.006	+	hsa_circ_0002626	ETV6-RUNX1_or_like
18:19345732-19399607	chr18	19345732	19399607	-3.20553	0.0430994	-3.28949	5.28e-21	MIB1	ENSG00000101752	31.213	3.586	0.056	0.036	3.2425	1.1037	1.6848	1.7364	1.1742	1.5306	-2.7444	0.0181281	-2.96313	3.78046e-06	72.147	10.81	0.154	0.051	+	hsa_circ_0000836	ETV6-RUNX1_or_like
8:18656804-18662408	chr8	18656804	18662408	-4.22103	6.83e-08	-3.31274	2.76e-11	PSD3	ENSG00000156011	127.819	6.047	0.799	0.228	1.8528	1.1037	4.212	3.4727	5.1665	0	-3.38443	9.90132e-08	-4.00817	2.03608e-61	122.688	11.704	0.306	0.345	-	hsa_circ_0004458	HHD
14:97299803-97327072	chr14	97299803	97327072	-2.4926	1.09e-06	-2.51116	7.89e-06	VRK1	ENSG00000100749	243.151	44.274	0.859	0.242	25.0133	42.7681	14.0399	13.3122	17.3782	3.0611	-1.23087	0.0388084	-1.39791	6.45652e-06	379.867	161.668	0.315	0.476	+	hsa_circ_0000566	HHD
10:7318853-7327916	chr10	7318853	7327916	-2.32291	1.71e-05	-1.44416	0.00576688	SFMBT2	ENSG00000198879	336.894	67.926	2.74	1.003	19.4548	22.0738	15.6311	4.3988	16.9086	44.7693	-4.07025	5.79169e-09	-2.78285	2.17105e-21	419.45	24.95	1.398	0.637	-	hsa_circ_0000211	HHD
13:28588588-28589838	chr13	28588588	28589838	-6.46522	2.1e-05	-7.98199	7.29e-88	FLT3	ENSG00000122025	43.252	0	0.061	0	3.2425	0	1.1232	11.1128	0.7045	0	-5.1838	0.00818833	-5.54654	2.55534e-58	15.47	0.423	0.006	0.006	NA	NA	HHD
10:116879948-116889297	chr10	116879948	116889297	-4.19021	2.25e-05	-5.32075	4.13e-17	ATRNL1	ENSG00000107518	79.62	4.763	4.895	1.191	3.0109	11.8647	125.049	42.599	3.5226	2.2959	-6.41426	1.15876e-19	-5.52501	1.01069e-24	440.989	5.175	4.034	0.842	+	hsa_circ_0020093	HHD
10:7285519-7327916	chr10	7285519	7327916	-3.54922	3.48e-05	-1.44416	0.00576688	SFMBT2	ENSG00000198879	57.277	4.688	0.535	0.096	5.5585	12.9684	4.3056	0.5788	9.8633	19.1322	-2.74201	1.39269e-06	-2.78285	2.17105e-21	94.012	14.164	0.376	0.338	-	hsa_circ_0017636	HHD
8:18622958-18662408	chr8	18622958	18662408	-6.75749	3.48e-05	-3.31274	2.76e-11	PSD3	ENSG00000156011	101.531	1.012	0.693	0.023	5.5585	1.1037	6.6456	7.64	7.5149	0	-5.07788	1.10315e-18	-4.00817	2.03608e-61	150.446	4.562	0.445	0.134	-	hsa_circ_0002111	HHD
13:28611321-28624359	chr13	28611321	28624359	-6.46865	3.58e-05	-7.98199	7.29e-88	FLT3	ENSG00000122025	42.416	0	0.059	0	2.316	0	5.148	23.2674	0.7045	0	-5.19866	8.26931e-16	-5.54654	2.55534e-58	178.248	4.955	0.073	0.091	NA	NA	HHD
10:7409610-7423911	chr10	7409610	7423911	-6.16702	6.59e-05	-1.44416	0.00576688	SFMBT2	ENSG00000198879	67.134	1.177	0.565	0.013	1.158	4.4148	0.468	0.1158	5.6362	2.6785	-4.6653	3.78585e-14	-2.78285	2.17105e-21	141.451	5.739	0.588	0.135	-	hsa_circ_0017648	HHD
4:103225473-103236987	chr4	103225473	103236987	-6.14679	7.51e-05	-2.44716	3.12e-10	SLC39A8	ENSG00000138821	33.114	0	0.207	0	2.316	3.0352	4.8672	5.3249	7.5149	3.4438	-2.30865	8.56749e-06	-2.34391	1.94135e-29	95.962	19.445	0.312	0.277	-	hsa_circ_0002782	HHD
13:28598997-28602425	chr13	28598997	28602425	-6.12597	0.000147207	-7.98199	7.29e-88	FLT3	ENSG00000122025	34.812	0	0.047	0	0.4632	0	2.5272	13.6595	1.409	0	-5.89499	2.08276e-09	-5.54654	2.55534e-58	62.607	1.142	0.025	0.026	NA	NA	HHD
13:28597486-28602425	chr13	28597486	28602425	-5.97479	0.000188717	-7.98199	7.29e-88	FLT3	ENSG00000122025	31.247	0	0.047	0	0.2316	0	1.5912	10.7655	1.1742	0	-5.32911	3.13241e-09	-5.54654	2.55534e-58	51.418	1.412	0.021	0.032	NA	NA	HHD
13:28748408-28794515	chr13	28748408	28794515	-5.59589	0.000212875	-0.500686	0.397082	PAN3	ENSG00000152520	45.105	0.551	0.146	0.002	0.9264	0.2759	1.5912	17.5952	1.6439	1.1479	-2.70384	6.77322e-07	-1.61327	8.53245e-06	97.211	14.907	0.14	0.073	+	hsa_circ_0005831	HHD
10:7318853-7423911	chr10	7318853	7423911	-5.79168	0.000300029	-1.44416	0.00576688	SFMBT2	ENSG00000198879	25.956	0	0.242	0	0.9264	1.3796	0.0936	0	0.7045	0	-4.12567	5.62802e-07	-2.78285	2.17105e-21	50.653	2.772	0.198	0.087	-	hsa_circ_0017641	HHD
3:154832782-154836600	chr3	154832782	154836600	-5.72806	0.000300029	-4.89948	8.64e-13	MME	ENSG00000196549	25.509	0	0.013	0	0.4632	2.4833	0	0	0	0	-6.76534	7.89404e-06	-6.14457	1.40757e-52	26.412	0.211	0.005	0.006	+	hsa_circ_0002626	HHD
10:125798030-125806240	chr10	125798030	125806240	-5.10095	0.000315195	-4.18576	2.13e-21	CHST15	ENSG00000182022	55.962	1.563	0.199	0.053	3.0109	2.4833	6.3648	5.7879	4.9317	0	-4.12011	1.57114e-09	-2.69402	4.19435e-13	130.493	7.54	0.232	0.06	-	hsa_circ_0000264	HHD
6:4891946-4892613	chr6	4891946	4892613	-1.9732	0.000315195	-0.778733	0.0634555	CDYL	ENSG00000153046	85.262	22.229	0.733	0.254	15.0543	31.4552	32.6663	33.8014	51.4302	92.217	-1.74625	0.00015837	-0.721542	0.0011804	312.208	93.163	1.191	0.716	+	hsa_circ_0008285	HHD
13:28622411-28624359	chr13	28622411	28624359	-5.47815	0.00044609	-7.98199	7.29e-88	FLT3	ENSG00000122025	22.414	0	0.03	0	0.6948	0	1.7784	9.7237	0	0	-5.80575	1.26082e-06	-5.54654	2.55534e-58	41.579	0.69	0.017	0.027	NA	NA	HHD
8:18725183-18730243	chr8	18725183	18730243	-5.48307	0.000531383	-3.31274	2.76e-11	PSD3	ENSG00000156011	20.93	0	0.137	0	1.8528	0.2759	4.1184	7.8716	6.1059	0	-5.10469	1.50906e-11	-4.00817	2.03608e-61	64.34	2.025	0.194	0.061	NA	NA	HHD
14:32559707-32586493	chr14	32559707	32586493	-2.66724	0.000986553	-1.2957	0.00870263	ARHGAP5	ENSG00000100852	49.206	7.888	0.442	0.07	9.7274	9.6573	12.2616	13.3122	13.3859	2.6785	-2.67139	5.5839e-07	-0.50221	0.0863861	108.854	17.013	0.452	0.086	+	hsa_circ_0031584	HHD
10:98078108-98082485	chr10	98078108	98082485	-5.15053	0.00187069	-9.36352	2.8e-45	DNTT	ENSG00000107447	16.104	0	0.008	0	0.6948	0	0	0	0.9394	0	-7.52509	8.01704e-06	-14.5933	1.3764e-196	27.329	0	0.002	0	NA	NA	HHD
13:28608023-28624359	chr13	28608023	28624359	-5.22066	0.00207689	-7.98199	7.29e-88	FLT3	ENSG00000122025	19.072	0	0.02	0	0.4632	0	1.6848	14.5855	1.1742	0	-8.05661	1.57114e-09	-5.54654	2.55534e-58	64.94	0.211	0.027	0.004	NA	NA	HHD
X:154018228-154020560	chrX	154018228	154020560	-4.99637	0.00227904	NA	NA	MPP1	ENSG00000269326	14.553	0	0.025	0	0.4632	0.5518	0.2808	0.2315	0	0	-2.70228	0.0178916	-2.23967	3.94272e-10	22.754	3.513	0.011	0.008	-	hsa_circ_0001952	HHD
10:7412242-7423911	chr10	7412242	7423911	-5.14154	0.00230022	-1.44416	0.00576688	SFMBT2	ENSG00000198879	16.794	0	0.156	0	1.6212	1.3796	0.1872	0.2315	0.2348	0.7653	-5.23577	0.00532844	-2.78285	2.17105e-21	16.063	0.481	0.054	0.012	-	hsa_circ_0017649	HHD
17:20107645-20109225	chr17	20107645	20109225	-3.59718	0.00534901	-2.97404	2.89e-21	SPECC1	ENSG00000128487	32.811	3.035	1.349	0.254	3.9373	3.587	20.6855	9.4922	4.462	68.1105	-1.38105	0.00689189	-1.42792	9.70661e-07	181.196	69.656	1.423	2.405	+	hsa_circ_0000745	HHD
7:100410368-100410830	chr7	100410368	100410830	-3.96486	0.00575317	-3.27316	6.79e-21	EPHB4	ENSG00000196411	25.219	2.023	1.124	0.161	14.1279	5.2425	3.0888	1.2733	11.0375	0	-6.934	1.55996e-05	-4.24702	2.44635e-28	30.032	0.239	0.527	0.097	-	hsa_circ_0001730	HHD
5:143042459-143052262	chr5	143042459	143052262	-2.73165	0.00583317	-5.648	1.1e-18	CTB-57H20.1	ENSG00000249881	32.811	5.019	0.67	1.148	1.158	0.8278	0.936	0.5788	0.7045	0	-6.3665	2.78561e-07	-6.2403	1.81359e-41	65.547	0.797	0.463	0.342	NA	NA	HHD
18:45391429-45423180	chr18	45391429	45423180	-3.23197	0.00635955	-1.04343	0.00202448	SMAD2	ENSG00000175387	30.551	3.125	0.09	0.012	2.0844	1.3796	5.7096	3.7043	3.2878	1.5306	-1.84851	0.000295795	-1.08418	7.43928e-25	119.135	33.043	0.146	0.067	-	hsa_circ_0000847	HHD
20:62407030-62422143	chr20	62407030	62422143	-2.91865	0.00808064	-3.33513	8.19e-06	ZBTB46	ENSG00000130584	31.884	4.008	1.899	1.125	2.316	0	0	0.1158	1.1742	1.1479	-3.78774	0.0154624	-4.36446	3.98233e-23	9.016	0.535	1.293	0.321	-	hsa_circ_0002805	HHD
21:30693541-30702014	chr21	30693541	30702014	-2.03865	0.00883101	1.73095	0.000330519	BACH1	ENSG00000156273	33.88	7.684	0.161	0.008	6.9481	3.0352	7.3008	5.0934	2.5833	6.8876	-2.14783	0.00215594	1.47339	2.99983e-09	64.306	14.615	0.269	0.019	+	hsa_circ_0001181	HHD
6:18236682-18258636	chr6	18236682	18258636	-2.39421	0.00941764	-1.90507	7.82e-06	DEK	ENSG00000124795	29.921	5.736	0.034	0.015	2.316	3.3111	5.8032	7.64	3.9923	3.0611	-2.33004	2.70728e-06	-1.27477	2.79793e-05	374.157	74.471	0.155	0.103	-	hsa_circ_0075796	HHD
19:4950622-4951008	chr19	4950622	4951008	-4.42906	0.0132138	-8.45169	2.18e-41	UHRF1	ENSG00000034063	10.138	0	0.014	0	5.0953	6.0703	1.0296	2.4309	5.871	0.7653	-5.14153	0.00124467	-9.79383	1.45469e-110	23.404	0.722	0.007	0.454	+	hsa_circ_0002185	HHD
13:28589293-28597614	chr13	28589293	28597614	-4.42511	0.0136142	-7.98199	7.29e-88	FLT3	ENSG00000122025	10.895	0	0.015	0	0.4632	0	0.8424	7.5243	0	0	-4.86897	0.000387266	-5.54654	2.55534e-58	17.973	0.634	0.008	0.009	NA	NA	HHD
12:12397195-12397589	chr12	12397195	12397589	-4.15728	0.0136288	-2.43211	3.5e-26	LRP6	ENSG00000070018	14.879	0.551	0.546	0.094	3.4741	2.2074	5.0544	7.0612	5.4013	0.7653	-3.64546	1.53465e-08	-4.96411	2.07235e-75	53.959	4.322	0.503	1.403	-	hsa_circ_0000378	HHD
2:106739425-106782539	chr2	106739425	106782539	-2.695	0.0156809	-0.707296	0.0335851	UXS1	ENSG00000115652	20.241	3.291	4.415	0.025	1.8528	6.8981	2.4336	3.2412	5.6362	0.7653	-1.70683	0.0479265	-0.963877	1.35695e-07	28.872	8.878	26.398	0.036	-	hsa_circ_0055945	HHD
13:28592603-28602425	chr13	28592603	28602425	-4.29959	0.0160394	-7.98199	7.29e-88	FLT3	ENSG00000122025	9.373	0	0.014	0	0	0	0.2808	2.6624	0	0	-6.96673	9.0214e-06	-5.54654	2.55534e-58	18.511	0	0.007	0	NA	NA	HHD
10:13214375-13214765	chr10	13214375	13214765	-4.1294	0.0184458	-6.08469	4.27e-32	MCM10	ENSG00000065328	16.663	0.551	0.351	0.777	3.0109	11.8647	5.2416	3.82	2.5833	3.4438	-2.0787	0.0475947	-6.30436	5.05802e-47	28.864	6.794	0.11	3.978	+	hsa_circ_0002109	HHD
4:3317796-3344780	chr4	3317796	3344780	-4.48196	0.0239386	-3.32353	2.4e-13	RGS12	ENSG00000159788	11.46	0	0.163	0	0.9264	0.8278	0.7488	1.0418	0.7045	0	-6.61291	1.18624e-05	-4.80879	2.08306e-42	24.006	0.211	24.374	0.038	+	hsa_circ_0006091	HHD
21:38480691-38519903	chr21	38480691	38519903	-3.36062	0.0242567	-0.3079	0.346708	TTC3	ENSG00000182670	17.18	1.563	0.043	0.004	1.158	1.6555	1.6848	1.1576	1.6439	0.3826	-2.59393	0.000301009	-0.901536	2.16608e-05	39.698	6.42	0.036	0.015	+	hsa_circ_0061668	HHD
1:45223227-45223812	chr1	45223227	45223812	-4.00275	0.0295549	-5.89802	1.14e-20	KIF2C	ENSG00000142945	7.334	0	0.306	0	2.7793	6.6222	4.3056	3.357	3.7575	1.1479	-4.5763	0.0441351	-5.20679	4.53506e-23	5.933	0.239	0.033	0.155	+	hsa_circ_0002563	HHD
10:7262372-7327916	chr10	7262372	7327916	-3.90628	0.0331327	-1.44416	0.00576688	SFMBT2	ENSG00000198879	14.558	0.551	0.108	0.024	1.3896	0	0.5616	0.463	1.8787	1.1479	-3.29508	0.00536601	-2.78285	2.17105e-21	24.784	2.545	0.099	0.062	-	hsa_circ_0017628	HHD
12:1136913-1137738	chr12	1136913	1137738	-2.41388	0.0365974	0.225967	0.558566	ERC1	ENSG00000082805	20.635	2.756	0.552	0.053	3.7057	3.3111	3.8376	3.4727	6.8104	0.3826	-1.70019	0.00414569	-0.399773	0.161738	41.572	12.693	0.235	0.118	+	hsa_circ_0000373	HHD
13:28636003-28644749	chr13	28636003	28644749	-3.78872	0.0396488	-7.98199	7.29e-88	FLT3	ENSG00000122025	6.358	0	0.01	0	0.9264	0	0.6552	4.5146	0.2348	0	-6.01254	4.82919e-05	-5.54654	2.55534e-58	15.934	0.239	0.006	0.009	NA	NA	HHD
10:116879948-116925405	chr10	116879948	116925405	-3.61965	0.0424969	-5.32075	4.13e-17	ATRNL1	ENSG00000107518	11.577	1.177	0.555	0.174	1.8528	1.6555	4.4928	1.9679	0	0	-4.81941	0.000959648	NA	NA	17.347	0.634	0.199	0.068	+	hsa_circ_0020094	HHD
11:33307958-33309057	chr11	33307958	33309057	-2.81332	1.12e-10	-0.998108	0.0203456	HIPK3	ENSG00000110422	296.179	41.861	1.115	0.183	28.0242	16.2795	38.7503	39.3578	24.8931	27.1677	-1.35703	0.00108153	-0.551544	0.17559	891.708	348.517	1.43	1.267	+	hsa_circ_0000284	MLL
13:28830428-28835595	chr13	28830428	28835595	-4.05957	1.42e-07	-2.48166	9.2e-06	PAN3	ENSG00000152520	119.862	7.133	0.078	0.018	3.4741	1.3796	36.7847	89.2495	3.5226	0.3826	-3.51602	4.05334e-08	-3.0273	2.5494e-09	578.898	50.848	0.115	0.251	+	hsa_circ_0008902	MLL
13:28597486-28602425	chr13	28597486	28602425	-7.14219	3.06e-06	-9.0232	1e-49	FLT3	ENSG00000122025	66.934	0	0.029	0	0.2316	0	1.5912	10.7655	1.1742	0	-6.04884	9.376e-09	-5.76357	2.57781e-17	82.946	1.412	0.014	0.032	NA	NA	MLL
13:28611321-28624359	chr13	28611321	28624359	-7.19093	4.17e-06	-9.0232	1e-49	FLT3	ENSG00000122025	68.45	0	0.034	0	2.316	0	5.148	23.2674	0.7045	0	-5.72222	7.53084e-13	-5.76357	2.57781e-17	253.527	4.955	0.041	0.091	NA	NA	MLL
13:28598997-28602425	chr13	28598997	28602425	-7.03405	7.7e-06	-9.0232	1e-49	FLT3	ENSG00000122025	61.462	0	0.028	0	0.4632	0	2.5272	13.6595	1.409	0	-6.21423	3.39916e-08	-5.76357	2.57781e-17	75.823	1.142	0.012	0.026	NA	NA	MLL
13:28830428-28855516	chr13	28830428	28855516	-3.1138	1.12e-05	-2.48166	9.2e-06	PAN3	ENSG00000152520	88.169	10.168	0.041	0.023	0.2316	0.8278	14.1335	59.2682	1.1742	1.1479	-2.96171	5.25885e-05	-3.0273	2.5494e-09	136.97	17.666	0.028	0.087	+	hsa_circ_0029853	MLL
13:28588588-28589838	chr13	28588588	28589838	-6.91185	1.56e-05	-9.0232	1e-49	FLT3	ENSG00000122025	58.757	0	0.022	0	3.2425	0	1.1232	11.1128	0.7045	0	-5.33914	0.0179021	-5.76357	2.57781e-17	16.824	0.423	0.003	0.006	NA	NA	MLL
13:28748408-28794515	chr13	28748408	28794515	-6.42128	1.82e-05	-2.48166	9.2e-06	PAN3	ENSG00000152520	78.621	0.551	0.049	0.002	0.9264	0.2759	1.5912	17.5952	1.6439	1.1479	-2.78045	3.72787e-05	-3.0273	2.5494e-09	103.098	14.907	0.024	0.073	+	hsa_circ_0005831	MLL
17:20107645-20109225	chr17	20107645	20109225	-4.72928	3.5e-05	-3.2723	8.01e-10	SPECC1	ENSG00000128487	67.702	3.035	1.047	0.254	3.9373	3.587	20.6855	9.4922	4.462	68.1105	-2.85082	3.52509e-08	-1.66353	0.00186813	499.381	69.656	1.172	2.405	+	hsa_circ_0000745	MLL
4:103225473-103236987	chr4	103225473	103236987	-6.47809	3.9e-05	-2.97176	1.89e-12	SLC39A8	ENSG00000138821	42.516	0	0.109	0	2.316	3.0352	4.8672	5.3249	7.5149	3.4438	-2.73354	1.24798e-05	-3.16323	5.18658e-36	128.999	19.445	0.096	0.277	-	hsa_circ_0002782	MLL
1:44877652-44878394	chr1	44877652	44878394	-7.79782	4.25e-05	-2.14053	1.76e-10	RNF220	ENSG00000187147	106.255	0	0.944	0	0	0	14.2271	23.3831	0	0	-10.4393	4.17928e-16	-2.25629	5.1148e-07	340.845	0.134	2.452	0.001	+	hsa_circ_0012152	MLL
12:116534473-116549317	chr12	116534473	116549317	-2.72937	6.57e-05	-0.353344	0.475259	MED13L	ENSG00000123066	140.485	21.292	0.192	0.038	3.2425	1.1037	1.0296	3.82	0.9394	1.9132	-2.30064	0.00701815	-1.38165	0.000144751	72.933	14.772	0.04	0.052	-	hsa_circ_0000441	MLL
4:37633006-37640126	chr4	37633006	37640126	-2.78884	0.000191242	-0.722855	0.270628	RELL1	ENSG00000181826	64.396	8.787	0.718	0.106	3.9373	4.9666	5.148	6.2509	3.2878	9.9487	-1.96329	0.016906	-3.60358	0.00019188	211.989	54.278	0.71	1.411	-	hsa_circ_0001400	MLL
6:4891946-4892613	chr6	4891946	4892613	-2.23756	0.000254983	-0.0962698	0.821804	CDYL	ENSG00000153046	104.953	22.229	1.178	0.254	15.0543	31.4552	32.6663	33.8014	51.4302	92.217	-2.44098	8.30656e-08	-0.076943	0.837512	502.359	93.163	1.783	0.716	+	hsa_circ_0008285	MLL
13:28840851-28845003	chr13	28840851	28845003	-5.67467	0.000425861	-2.48166	9.2e-06	PAN3	ENSG00000152520	48.319	1.012	0.025	0.002	1.3896	0.5518	8.424	33.6856	0.4697	1.5306	-3.24388	0.00080488	-3.0273	2.5494e-09	76.797	8.332	0.015	0.042	+	hsa_circ_0000469	MLL
3:138289159-138291826	chr3	138289159	138291826	-5.92519	0.000425861	-4.82074	4.37e-31	CEP70	ENSG00000114107	28.579	0	0.082	0	1.6212	1.1037	1.5912	3.0097	3.9923	0	-3.10451	0.00406125	-2.57278	9.65008e-10	63.856	7.38	0.069	0.251	-	hsa_circ_0003823	MLL
9:37126308-37327831	chr9	37126308	37327831	-2.70908	0.000584971	-1.95054	4.94e-14	ZCCHC7	ENSG00000147905	58.306	9.156	0.031	0.022	1.158	0.2759	8.5176	3.5885	4.462	2.2959	-3.17963	5.27524e-08	-0.958414	0.0535422	165.262	18.405	0.028	0.025	+	hsa_circ_0087047	MLL
13:28608023-28624359	chr13	28608023	28624359	-5.5719	0.00122341	-9.0232	1e-49	FLT3	ENSG00000122025	22.201	0	0.011	0	0.4632	0	1.6848	14.5855	1.1742	0	-7.83236	4.29867e-07	-5.76357	2.57781e-17	56.265	0.211	0.01	0.004	NA	NA	MLL
10:65140077-65140242	chr10	65140077	65140242	-5.64478	0.001296	1.1133	0.128814	JMJD1C	ENSG00000171988	25.414	0	0.047	0	0.2316	0.5518	1.872	4.8618	0.4697	1.1479	-4.26445	1.37658e-05	-0.0260579	0.962038	60.997	3.095	0.047	0.005	-	hsa_circ_0006743	MLL
13:28592603-28602425	chr13	28592603	28602425	-5.38301	0.0020621	-9.0232	1e-49	FLT3	ENSG00000122025	19.948	0	0.008	0	0	0	0.2808	2.6624	0	0	-6.88525	0.00210802	-5.76357	2.57781e-17	17.411	0	0.003	0	NA	NA	MLL
8:18622958-18662408	chr8	18622958	18662408	-5.06626	0.00208652	-1.44283	0.000605327	PSD3	ENSG00000156011	31.56	1.012	0.455	0.023	5.5585	1.1037	6.6456	7.64	7.5149	0	-5.18297	6.51561e-13	-3.14967	3.80812e-15	161.985	4.562	0.34	0.134	-	hsa_circ_0002111	MLL
1:230313963-230339036	chr1	230313963	230339036	-2.31851	0.00221325	-2.15217	7.16e-09	GALNT2	ENSG00000143641	55.548	11.971	0.13	0.646	7.4114	0.5518	9.2664	8.3346	2.1136	0.7653	-4.13605	1.71986e-06	-3.07604	1.62298e-27	87.441	5.051	0.051	0.067	+	hsa_circ_0000192	MLL
17:44248220-44249598	chr17	44248220	44249598	-3.54283	0.00224715	0.500525	0.48422	KANSL1	ENSG00000120071	37.661	3.125	0.885	0.016	7.4114	3.0352	1.4976	3.5885	2.8181	11.0967	-2.15047	0.0321228	-0.474597	0.370709	59.037	13.568	0.447	0.158	-	hsa_circ_0005455	MLL
1:12638745-12639440	chr1	12638745	12639440	-5.32625	0.00244922	-8.54586	2.91e-37	DHRS3	ENSG00000162496	18.851	0	0.046	0	0	0.2759	0	0	0	0	-6.95915	0.00144628	-5.02035	9.96615e-35	18.428	0	0.013	0	-	hsa_circ_0010023	MLL
19:4950622-4951008	chr19	4950622	4951008	-5.27951	0.00560439	-8.4128	4.75e-31	UHRF1	ENSG00000034063	19.021	0	0.008	0	5.0953	6.0703	1.0296	2.4309	5.871	0.7653	-5.36715	0.00457104	-9.63098	4.93358e-85	26.213	0.722	0.006	0.454	+	hsa_circ_0002185	MLL
4:156617907-156643344	chr4	156617907	156643344	-5.07666	0.0069313	-6.22369	4.35e-38	GUCY1A3	ENSG00000164116	17.096	0	0.039	0	0	0.2759	1.1232	0.2315	0.4697	0	-3.43966	0.000332484	-3.27569	1.04976e-13	66.322	6.049	0.03	0.059	NA	NA	MLL
16:80718434-80719026	chr16	80718434	80719026	-5.23449	0.0111855	-4.32076	0.000774333	CDYL2	ENSG00000166446	18.289	0	3.374	0	0	0	1.3104	7.8716	11.9769	8.8008	-2.26329	0.00143092	-1.58253	0.00174375	112.836	23.859	5.893	8.053	-	hsa_circ_0004087	MLL
15:43120125-43132631	chr15	43120125	43132631	-1.77412	0.0115438	-0.654339	0.0517572	TTBK2	ENSG00000128881	70.186	20.057	0.632	0.256	3.9373	0.2759	3.6504	7.5243	5.1665	0.3826	-1.70306	0.0164882	-0.559426	0.0707634	122.069	38.02	0.44	0.329	-	hsa_circ_0008319	MLL
13:28622411-28624359	chr13	28622411	28624359	-4.85554	0.0116767	-9.0232	1e-49	FLT3	ENSG00000122025	13.549	0	0.007	0	0.6948	0	1.7784	9.7237	0	0	-4.50003	0.0330386	-5.76357	2.57781e-17	16.118	0.69	0.003	0.027	NA	NA	MLL
9:37126308-37305711	chr9	37126308	37305711	-2.11652	0.0163351	-1.95054	4.94e-14	ZCCHC7	ENSG00000147905	47.112	10.054	0.022	0.027	1.6212	0	7.02	4.1673	4.2271	0	-2.10649	0.037069	-0.958414	0.0535422	88.414	21.205	0.013	0.027	+	hsa_circ_0087046	MLL
16:68155889-68157024	chr16	68155889	68157024	-1.6457	0.0177337	-1.0418	0.00793213	NFATC3	ENSG00000072736	151.844	49.588	0.48	0.161	3.4741	5.5185	21.9023	17.4795	6.3407	7.2702	-2.48871	4.9839e-09	-0.813385	0.0114427	610.208	108.593	0.684	0.444	+	hsa_circ_0005615	MLL
3:71408300-71542706	chr3	71408300	71542706	-4.61863	0.0235256	2.18909	1.24e-14	FOXP1	ENSG00000114861	45.591	2.023	0.371	0.002	0	0	0	0.1158	0.2348	0	-3.79649	0.00367828	1.10595	0.000395767	35.876	2.591	0.224	0.006	NA	NA	MLL
6:157150360-157256710	chr6	157150360	157256710	-2.30317	0.0235256	1.72784	2.19e-07	ARID1B	ENSG00000049618	37.122	8.294	0.454	0.026	0	0.2759	2.34	1.0418	0	0	-2.86147	0.0145403	-1.38121	0.0206115	35.134	5.006	0.226	0.081	+	hsa_circ_0006405	MLL
12:1136913-1137738	chr12	1136913	1137738	-2.81838	0.0308301	0.0380989	0.959638	ERC1	ENSG00000082805	26.149	2.756	0.486	0.053	3.7057	3.3111	3.8376	3.4727	6.8104	0.3826	-2.21184	0.0125693	-0.737797	0.180616	58.531	12.693	0.173	0.118	+	hsa_circ_0000373	MLL
3:138244331-138256189	chr3	138244331	138256189	-3.7497	0.0311381	-4.82074	4.37e-31	CEP70	ENSG00000114107	20.271	1.102	0.06	0.099	0.4632	0.5518	3.5568	3.7043	2.8181	0	-2.29652	0.0218909	-2.57278	9.65008e-10	45.153	8.979	0.049	0.374	NA	NA	MLL
13:28589293-28597614	chr13	28589293	28597614	-4.50434	0.0337393	-9.0232	1e-49	FLT3	ENSG00000122025	10.393	0	0.005	0	0.4632	0	0.8424	7.5243	0	0	-5.50715	0.00319429	-5.76357	2.57781e-17	27.386	0.634	0.005	0.009	NA	NA	MLL
9:37302184-37327831	chr9	37302184	37327831	-3.10209	0.0353125	-1.95054	4.94e-14	ZCCHC7	ENSG00000147905	21.311	2.74	0.011	0.007	1.6212	0.2759	1.7784	3.0097	0.2348	0.3826	-2.80863	0.0156571	-0.958414	0.0535422	38.342	5.498	0.007	0.007	+	hsa_circ_0087051	MLL
2:10559859-10560261	chr2	10559859	10560261	-3.14573	0.0375903	0.293697	0.595491	HPCAL1	ENSG00000115756	22.303	2.574	0.373	0.062	0.2316	0.2759	0	0.2315	0	0.3826	-3.85885	0.00449937	-1.52154	0.00191619	27.661	1.918	0.226	0.14	+	hsa_circ_0000976	MLL
13:28636003-28644749	chr13	28636003	28644749	-4.49827	0.0379678	-9.0232	1e-49	FLT3	ENSG00000122025	10.311	0	0.005	0	0.9264	0	0.6552	4.5146	0.2348	0	-5.49901	0.0351082	-5.76357	2.57781e-17	11.112	0.239	0.002	0.009	NA	NA	MLL
13:28589293-28589838	chr13	28589293	28589838	-4.5436	0.0406363	-9.0232	1e-49	FLT3	ENSG00000122025	12.111	0	0.003	0	0.4632	0	0.1872	1.3891	0	0	-6.18077	0.0251581	-5.76357	2.57781e-17	10.956	0	0.002	0	-	hsa_circ_0029829	MLL
6:35586872-35610620	chr6	35586872	35610620	-5.41031	0.0406363	-4.13515	9.83e-07	FKBP5	ENSG00000096060	41.32	1.012	0.071	0.06	2.0844	3.0352	10.2024	4.7461	3.0529	0	-4.56589	9.26773e-05	-3.59532	5.26203e-06	86.63	3.707	0.042	0.04	-	hsa_circ_0001599	MLL
6:135522776-135524462	chr6	135522776	135524462	-4.25203	0.0442407	-6.95243	8.71e-63	MYB	ENSG00000118513	9.29	0	0.007	0	0.9264	1.9315	0.1872	0.3473	0	0	-6.67348	0.00808912	-7.48934	5.48618e-28	15.613	0	0.002	0	NA	NA	MLL
18:19345732-19399607	chr18	19345732	19399607	-2.75945	0.0454973	-1.34595	5.11e-05	MIB1	ENSG00000101752	23.949	3.586	0.094	0.036	3.2425	1.1037	1.6848	1.7364	1.1742	1.5306	-2.2884	0.0156265	-0.611609	0.172679	52.507	10.81	0.093	0.051	+	hsa_circ_0000836	MLL
8:18622958-18662408	chr8	18622958	18662408	-6.66362	4.46e-05	-2.96854	2.51e-07	PSD3	ENSG00000156011	95.497	1.012	0.466	0.023	5.5585	1.1037	6.6456	7.64	7.5149	0	-5.36144	0.000182317	-4.24037	9.61873e-09	186.726	4.562	0.215	0.134	-	hsa_circ_0002111	Phi_or_like
2:215632205-215646233	chr2	215632205	215646233	-4.31544	0.000276286	-1.84336	0.000924918	BARD1	ENSG00000138376	49.99	2.74	0.517	0.073	9.0326	6.3462	17.4095	21.1837	15.4995	6.1223	-2.21704	0.000239987	-1.35761	6.68786e-05	159.72	33.952	0.966	0.423	-	hsa_circ_0001098	Phi_or_like
3:154832782-154836600	chr3	154832782	154836600	-5.9383	0.000276286	-5.91922	3.3e-31	MME	ENSG00000196549	28.82	0	0.007	0	0.4632	2.4833	0	0	0	0	-7.17425	5.11151e-07	-6.8711	6.4275e-97	35.634	0.211	0.004	0.006	+	hsa_circ_0002626	Phi_or_like
3:35721278-35732497	chr3	35721278	35732497	-5.15516	0.000426053	-6.74499	6.16e-29	ARPP21	ENSG00000172995	62.825	2.189	1.563	0.424	1.3896	2.7592	10.4832	10.6498	0.7045	0	-7.91106	0.00603565	-7.86835	2.61927e-11	58.823	0.211	0.243	0.25	+	hsa_circ_0001281	Phi_or_like
4:103225473-103236987	chr4	103225473	103236987	-5.98461	0.000432759	-1.81136	7.74e-05	SLC39A8	ENSG00000138821	29.811	0	0.203	0	2.316	3.0352	4.8672	5.3249	7.5149	3.4438	-2.5804	2.99795e-05	-2.30244	3.63731e-05	115.926	19.445	0.401	0.277	-	hsa_circ_0002782	Phi_or_like
5:143042459-143052262	chr5	143042459	143052262	-3.29594	0.00066631	-6.02094	5.9e-21	CTB-57H20.1	ENSG00000249881	48.526	5.019	0.79	1.148	1.158	0.8278	0.936	0.5788	0.7045	0	-4.99504	0.000330344	-6.59267	2.75557e-16	26.067	0.797	0.087	0.342	NA	NA	Phi_or_like
10:125798030-125806240	chr10	125798030	125806240	-4.90558	0.000698027	-3.92451	6.48e-19	CHST15	ENSG00000182022	49.388	1.563	0.162	0.053	3.0109	2.4833	6.3648	5.7879	4.9317	0	-3.8314	1.9338e-08	-2.53802	1.02956e-13	106.773	7.54	0.193	0.06	-	hsa_circ_0000264	Phi_or_like
17:20107645-20109225	chr17	20107645	20109225	-4.15271	0.00186246	-2.67094	1.25e-09	SPECC1	ENSG00000128487	47.316	3.035	1.313	0.254	3.9373	3.587	20.6855	9.4922	4.462	68.1105	-1.78863	0.00386105	-1.38793	0.010903	239.251	69.656	1.616	2.405	+	hsa_circ_0000745	Phi_or_like
1:12638745-12639440	chr1	12638745	12639440	-5.3752	0.00224392	-8.00603	1.99e-17	DHRS3	ENSG00000162496	19.625	0	0.092	0	0	0.2759	0	0	0	0	-6.46796	0.00116549	-4.02554	1.54909e-05	12.843	0	0.041	0	-	hsa_circ_0010023	Phi_or_like
8:18725183-18730243	chr8	18725183	18730243	-5.39978	0.00278809	-2.96854	2.51e-07	PSD3	ENSG00000156011	20.706	0	0.093	0	1.8528	0.2759	4.1184	7.8716	6.1059	0	-5.07176	3.32399e-07	-4.24037	9.61873e-09	65.077	2.025	0.232	0.061	NA	NA	Phi_or_like
6:4891946-4892613	chr6	4891946	4892613	-1.92306	0.0031641	-0.100712	0.806245	CDYL	ENSG00000153046	83.688	22.229	1.112	0.254	15.0543	31.4552	32.6663	33.8014	51.4302	92.217	-1.59965	0.00504253	-0.0697663	0.823393	281.637	93.163	1.787	0.716	+	hsa_circ_0008285	Phi_or_like
10:98078108-98082485	chr10	98078108	98082485	-5.06834	0.00400397	-9.62694	1.23e-57	DNTT	ENSG00000107447	15.66	0	0.003	0	0.6948	0	0	0	0.9394	0	-7.01321	0.0488727	-14.7652	2.46135e-149	19.13	0	0.001	0	NA	NA	Phi_or_like
13:28611321-28624359	chr13	28611321	28624359	-5.28557	0.00400397	-6.92651	7.36e-14	FLT3	ENSG00000122025	18.568	0	0.052	0	2.316	0	5.148	23.2674	0.7045	0	-3.86519	1.06441e-05	-4.48149	1.06849e-11	70.587	4.955	0.069	0.091	NA	NA	Phi_or_like
X:2637701-2644414	chrX	2637701	2644414	-5.09496	0.00400397	-4.0636	2.2e-13	CD99	ENSG00000002586	15.971	0	0.006	0	0	0	0.1872	0.2315	0	0.3826	-2.76407	0.0481475	-2.12272	0.000223209	11.71	1.728	0.007	0.006	+	hsa_circ_0089810	Phi_or_like
6:18236682-18258636	chr6	18236682	18258636	-2.7306	0.00656543	-1.23029	0.00322073	DEK	ENSG00000124795	37.434	5.736	0.057	0.015	2.316	3.3111	5.8032	7.64	3.9923	3.0611	-1.82275	0.0003232	-0.434805	0.0743068	263.544	74.471	0.161	0.103	-	hsa_circ_0075796	Phi_or_like
13:28748408-28794515	chr13	28748408	28794515	-4.63651	0.00894679	0.276124	0.705366	PAN3	ENSG00000152520	22.945	0.551	0.077	0.002	0.9264	0.2759	1.5912	17.5952	1.6439	1.1479	-1.87177	0.00397489	-1.70623	0.00220963	54.449	14.907	0.083	0.073	+	hsa_circ_0005831	Phi_or_like
7:100410368-100410830	chr7	100410368	100410830	-3.61525	0.0162063	-2.6064	1.73e-12	EPHB4	ENSG00000196411	21.026	2.023	0.512	0.161	14.1279	5.2425	3.0888	1.2733	11.0375	0	-6.08733	0.000318939	-3.28108	1.39248e-11	16.53	0.239	0.501	0.097	-	hsa_circ_0001730	Phi_or_like
12:69214104-69218431	chr12	69214104	69218431	-4.18266	0.0174476	-1.921	0.000665206	MDM2	ENSG00000135679	16.987	1.012	0.027	0.004	7.643	5.7944	2.7144	1.9679	11.7421	3.4438	-4.27328	0.0353614	-3.48326	3.42684e-10	51.729	2.638	0.01	0.012	+	hsa_circ_0004448	Phi_or_like
13:28597486-28602425	chr13	28597486	28602425	-5.3079	0.0243914	-6.92651	7.36e-14	FLT3	ENSG00000122025	18.979	0	0.029	0	0.2316	0	1.5912	10.7655	1.1742	0	-3.74156	0.00331657	-4.48149	1.06849e-11	17.61	1.412	0.018	0.032	NA	NA	Phi_or_like
10:7318853-7327916	chr10	7318853	7327916	-1.54658	0.0277333	-0.44277	0.512324	SFMBT2	ENSG00000198879	196.677	67.926	1.944	1.003	19.4548	22.0738	15.6311	4.3988	16.9086	44.7693	-2.63827	0.00105203	-1.44317	0.00765813	155.451	24.95	1.017	0.637	-	hsa_circ_0000211	Phi_or_like
1:29068914-29070498	chr1	29068914	29070498	-3.47217	0.0289179	0.503211	0.233141	YTHDF2	ENSG00000198492	18.238	1.563	0.07	0.005	4.8637	4.6907	4.0248	3.9358	4.6968	7.2702	-2.2417	0.0244416	0.267491	0.470061	33.088	6.707	0.067	0.016	+	hsa_circ_0000039	Phi_or_like
18:45391429-45423180	chr18	45391429	45423180	-2.68322	0.0299772	-0.630977	0.138291	SMAD2	ENSG00000175387	21.57	3.125	0.05	0.012	2.0844	1.3796	5.7096	3.7043	3.2878	1.5306	-1.55917	0.0219699	-0.963507	0.0241498	97.69	33.043	0.133	0.067	-	hsa_circ_0000847	Phi_or_like
3:154801946-154836600	chr3	154801946	154836600	-4.21346	0.0305449	-5.91922	3.3e-31	MME	ENSG00000196549	8.806	0	0.002	0	0	1.6555	0	0	0	0	-7.00802	1.09021e-05	-6.8711	6.4275e-97	19.552	0	0.002	0	NA	NA	Phi_or_like
2:168920009-168986268	chr2	168920009	168986268	-3.63927	0.0307836	-1.8527	4.87e-06	STK39	ENSG00000198648	20.102	1.563	0.307	0.02	1.158	0	2.2464	2.1994	5.4013	0	-1.63497	0.0244415	-2.30137	0.000582806	65.292	20.703	0.402	0.275	-	hsa_circ_0005882	Phi_or_like
2:61712902-61717911	chr2	61712902	61717911	-2.75797	0.0322293	-0.831052	0.000910665	XPO1	ENSG00000082898	22.577	3.291	0.034	0.008	5.5585	7.174	5.8968	5.4406	9.6285	4.2091	-3.76946	1.50513e-06	-0.854017	0.00510652	61.435	4.64	0.034	0.006	-	hsa_circ_0005050	Phi_or_like
2:106739425-106782539	chr2	106739425	106782539	-2.7239	0.0376747	-1.10702	0.0473717	UXS1	ENSG00000115652	22	3.291	16.436	0.025	1.8528	6.8981	2.4336	3.2412	5.6362	0.7653	-2.00109	0.013097	-1.16394	0.00521054	35.266	8.878	9.214	0.036	-	hsa_circ_0055945	Phi_or_like
12:93938846-93960935	chr12	93938846	93960935	-4.11916	0.0390129	-9.17105	1.01e-33	SOCS2-AS1	ENSG00000246985	8.237	0	0.034	0	0	0.2759	0	0	0	0	-4.42871	0.0265371	-7.30088	6.94207e-41	9.093	0.451	0.027	0.343	NA	NA	Phi_or_like
3:44871462-44881948	chr3	44871462	44881948	-4.01765	0.0390129	-4.6865	3.72e-16	KIF15	ENSG00000163808	7.986	0	0.136	0	0	0	2.34	2.1994	1.1742	1.1479	-3.43855	0.00368475	-3.39555	1.3218e-21	20.352	1.803	0.109	0.146	+	hsa_circ_0002912	Phi_or_like
2:215617170-215661841	chr2	215617170	215661841	-3.32197	0.0393733	-1.84336	0.000924918	BARD1	ENSG00000138376	15.894	1.563	0.171	0.047	1.8528	3.3111	7.3944	4.9776	5.1665	3.8264	-2.1559	0.00490138	-1.35761	6.68786e-05	53.859	11.976	0.447	0.145	-	hsa_circ_0002999	Phi_or_like
14:32559707-32586493	chr14	32559707	32586493	-2.11639	0.0396406	-0.783902	0.105287	ARHGAP5	ENSG00000100852	34.156	7.888	0.23	0.07	9.7274	9.6573	12.2616	13.3122	13.3859	2.6785	-2.65997	1.05944e-05	-0.586807	0.232835	108.087	17.013	0.294	0.086	+	hsa_circ_0031584	Phi_or_like
3:154855890-154858081	chr3	154855890	154858081	-4.03441	0.0402967	-5.91922	3.3e-31	MME	ENSG00000196549	7.815	0	0.002	0	0.2316	1.6555	0	0	0	0	-6.5493	0.000199897	-6.8711	6.4275e-97	13.914	0	0.002	0	NA	NA	Phi_or_like
19:4950622-4951008	chr19	4950622	4951008	-4.02107	0.042141	-7.70114	3.05e-32	UHRF1	ENSG00000034063	7.786	0	0.011	0	5.0953	6.0703	1.0296	2.4309	5.871	0.7653	-4.40635	0.0168792	-8.40356	4.01283e-68	13.469	0.722	0.011	0.454	+	hsa_circ_0002185	Phi_or_like
1:201786215-201786413	chr1	201786215	201786413	-3.89516	0.0434541	-3.28088	2.94e-07	NAV1	ENSG00000134369	7.309	0	0.085	0	0	0.5518	0.0936	0	0	0	-5.27944	0.0433763	-6.86985	2.36301e-30	6.061	0	0.034	0	+	hsa_circ_0008264	Phi_or_like
13:28598997-28602425	chr13	28598997	28602425	-4.99985	0.0443113	-6.92651	7.36e-14	FLT3	ENSG00000122025	15.309	0	0.023	0	0.4632	0	2.5272	13.6595	1.409	0	-4.27167	0.00068224	-4.48149	1.06849e-11	20.419	1.142	0.019	0.026	NA	NA	Phi_or_like
13:28588588-28589838	chr13	28588588	28589838	-4.93851	0.0481812	-6.92651	7.36e-14	FLT3	ENSG00000122025	14.679	0	0.026	0	3.2425	0	1.1232	11.1128	0.7045	0	-4.76299	0.00936337	-4.48149	1.06849e-11	10.919	0.423	0.012	0.006	NA	NA	Phi_or_like
10:116879948-116889297	chr10	116879948	116889297	-5.86424	1.12e-10	-6.43865	6.06e-75	ATRNL1	ENSG00000107518	249.629	4.763	1.315	1.191	3.0109	11.8647	125.049	42.599	3.5226	2.2959	-6.80025	6.55834e-35	-6.59653	1.37113e-30	574.155	5.175	1.185	0.842	+	hsa_circ_0020093	TCF3-PBX1
4:166141085-166184511	chr4	166141085	166184511	-3.71607	2.61e-06	0.325062	0.622347	KLHL2	ENSG00000109466	235	17.353	0.913	0.147	1.158	6.0703	2.34	1.1576	5.1665	3.4438	-4.09542	1.89445e-10	-2.31191	4.15424e-06	577.715	33.838	0.489	0.241	+	hsa_circ_0071375	TCF3-PBX1
18:8718421-8720494	chr18	8718421	8720494	-4.89196	1.43e-05	-4.80498	2.81e-11	SOGA2	ENSG00000168502	142.569	4.228	0.177	0.205	0.6948	3.587	4.0248	1.7364	23.0144	0	-4.00044	2.18776e-15	-4.89733	1.80819e-62	285.446	17.612	0.432	0.965	+	hsa_circ_0000825	TCF3-PBX1
2:215632205-215646233	chr2	215632205	215646233	-5.53206	1.43e-05	-1.92194	7.43e-05	BARD1	ENSG00000138376	115.67	2.74	0.582	0.073	9.0326	6.3462	17.4095	21.1837	15.4995	6.1223	-2.01368	3.8688e-05	-1.58904	5.50276e-22	137.86	33.952	0.403	0.423	-	hsa_circ_0001098	TCF3-PBX1
6:22020567-22020771	chr6	22020567	22020771	-6.89462	4.84e-05	-5.85275	7.51e-20	CASC15	ENSG00000272168	57.989	0	0.366	0	4.1689	0	0	0.1158	7.9846	0	-6.68967	8.97241e-09	-7.00642	9.08074e-119	63.767	0.722	0.132	0.243	+	hsa_circ_0075828	TCF3-PBX1
4:187627716-187630999	chr4	187627716	187630999	-6.74344	0.000107827	-9.64466	6.27e-21	FAT1	ENSG00000083857	53.581	0	0.118	0	0	1.3796	0	0	29.3551	0	-9.52644	8.11644e-14	-12.0882	1.00454e-187	109.395	0	0.088	0	-	hsa_circ_0001461	TCF3-PBX1
5:158500403-158526471	chr5	158500403	158526471	-5.76759	0.000129268	-0.861397	0.141113	EBF1	ENSG00000164330	87.95	1.102	30.286	0.003	4.8637	3.3111	5.148	7.2928	14.795	2.2959	-6.72346	7.75892e-15	-2.23473	2.42562e-18	120.929	1.094	0.164	0.009	NA	NA	TCF3-PBX1
10:15617487-15634303	chr10	15617487	15634303	-6.60753	0.000207367	-12.1837	1.63e-32	ITGA8	ENSG00000077943	46.77	0	0.071	0	0	0	0	0	13.8556	0	-9.54065	4.37782e-14	-9.90947	2.03649e-11	110.447	0	0.058	0	NA	NA	TCF3-PBX1
12:25214525-25222365	chr12	25214525	25222365	-5.3225	0.000207367	-2.64906	8.31e-19	LRMP	ENSG00000118308	67.276	2.189	0.012	0.002	0.9264	1.1037	3.6504	2.3152	9.3936	0.3826	-2.91747	1.58485e-09	-2.46999	2.71791e-35	120.995	16.207	0.007	0.011	+	hsa_circ_0000381	TCF3-PBX1
10:117221450-117228839	chr10	117221450	117228839	-6.49709	0.000221386	NA	NA	ATRNL1	ENSG00000272811	43.094	0	0.203	0	1.3896	2.2074	23.1191	6.2509	0.4697	0	-9.13159	1.13024e-12	NA	NA	83.234	0	0.149	0	NA	NA	TCF3-PBX1
4:103225473-103236987	chr4	103225473	103236987	-6.27566	0.000452373	-2.13233	5.91e-14	SLC39A8	ENSG00000138821	35.795	0	0.133	0	2.316	3.0352	4.8672	5.3249	7.5149	3.4438	-2.21255	8.17106e-05	-2.19865	8.59545e-19	89.715	19.445	0.183	0.277	-	hsa_circ_0002782	TCF3-PBX1
6:4891946-4892613	chr6	4891946	4892613	-2.74261	0.000453181	-0.0910224	0.842084	CDYL	ENSG00000153046	147.594	22.229	0.901	0.254	15.0543	31.4552	32.6663	33.8014	51.4302	92.217	-1.97102	1.67579e-06	-0.00480636	0.97788	363.994	93.163	1.461	0.716	+	hsa_circ_0008285	TCF3-PBX1
14:32559707-32586493	chr14	32559707	32586493	-3.10723	0.000646795	-0.729554	0.0271369	ARHGAP5	ENSG00000100852	66.96	7.888	0.258	0.07	9.7274	9.6573	12.2616	13.3122	13.3859	2.6785	-3.2219	3.73996e-09	-0.358773	0.136192	159.675	17.013	0.358	0.086	+	hsa_circ_0031584	TCF3-PBX1
10:116879948-116931050	chr10	116879948	116931050	-4.33743	0.000727299	NA	NA	ATRNL1	ENSG00000272811	53.454	2.905	0.287	0.452	0.9264	3.0352	9.828	4.1673	0.4697	0.7653	-7.38897	2.30867e-12	-6.59653	1.37113e-30	100.064	0.662	0.198	0.137	NA	NA	TCF3-PBX1
2:168994597-169038600	chr2	168994597	169038600	-4.33492	0.000727299	-2.62506	2.26e-16	STK39	ENSG00000198648	50.21	2.905	0.252	0.028	2.0844	0.5518	2.6208	1.6206	8.2194	0	-4.93655	2.53076e-11	-2.39083	1.51535e-20	69.784	2.444	0.385	0.032	-	hsa_circ_0002029	TCF3-PBX1
2:168986050-168997268	chr2	168986050	168997268	-3.50789	0.00077622	-2.62506	2.26e-16	STK39	ENSG00000198648	55.535	5.019	0.264	0.054	0.9264	0.5518	2.6208	2.6624	4.6968	0	-1.84998	0.000257599	-2.39083	1.51535e-20	103.88	28.953	0.597	0.39	-	hsa_circ_0003296	TCF3-PBX1
5:143042459-143052262	chr5	143042459	143052262	-3.51526	0.00077622	-5.88697	8.19e-30	CTB-57H20.1	ENSG00000249881	55.294	5.019	0.578	1.148	1.158	0.8278	0.936	0.5788	0.7045	0	-7.42184	2.04408e-14	-6.67361	9.94416e-57	134.879	0.797	0.734	0.342	NA	NA	TCF3-PBX1
8:18622958-18662408	chr8	18622958	18662408	-5.69214	0.000932811	-1.54566	0.00447822	PSD3	ENSG00000156011	47.659	1.012	0.336	0.023	5.5585	1.1037	6.6456	7.64	7.5149	0	-4.63294	2.05459e-14	-2.9098	2.22523e-11	109.908	4.562	0.309	0.134	-	hsa_circ_0002111	TCF3-PBX1
2:168920009-168931741	chr2	168920009	168931741	-5.90818	0.000988679	-2.62506	2.26e-16	STK39	ENSG00000198648	28.069	0	0.143	0	1.6212	1.6555	1.1232	1.2733	2.8181	0	-3.12183	0.00530601	-2.39083	1.51535e-20	31.162	3.741	0.175	0.052	-	hsa_circ_0003279	TCF3-PBX1
2:168920009-168986268	chr2	168920009	168986268	-5.00718	0.00109317	-2.62506	2.26e-16	STK39	ENSG00000198648	51.341	1.563	0.261	0.02	1.158	0	2.2464	2.1994	5.4013	0	-2.3314	1.98732e-05	-2.39083	1.51535e-20	104.272	20.703	0.573	0.275	-	hsa_circ_0005882	TCF3-PBX1
1:46521466-46546422	chr1	46521466	46546422	-5.79093	0.0011798	-5.46304	9.17e-18	PIK3R3	ENSG00000117461	27.087	0	0.107	0	1.3896	1.9315	0.0936	1.7364	4.6968	1.9132	-5.29111	1.13446e-07	-5.65987	3.4682e-49	50.099	1.438	0.14	0.321	-	hsa_circ_0012300	TCF3-PBX1
2:169018296-169038600	chr2	169018296	169038600	-2.80976	0.00156413	-2.62506	2.26e-16	STK39	ENSG00000198648	72.853	10.054	0.378	0.112	4.4005	1.3796	6.9264	6.0194	8.2194	0	-1.48252	0.00277423	-2.39083	1.51535e-20	183.41	65.652	0.982	0.856	-	hsa_circ_0001079	TCF3-PBX1
2:168994597-168997268	chr2	168994597	168997268	-5.49874	0.00293638	-2.62506	2.26e-16	STK39	ENSG00000198648	22.56	0	0.091	0	0.9264	0.2759	0.8424	1.0418	2.5833	0	-2.79546	0.00335724	-2.39083	1.51535e-20	28.078	4.216	0.158	0.057	-	hsa_circ_0002193	TCF3-PBX1
3:35721278-35732497	chr3	35721278	35732497	-4.76729	0.00314945	-6.5454	5.18e-26	ARPP21	ENSG00000172995	46.759	2.189	0.153	0.424	1.3896	2.7592	10.4832	10.6498	0.7045	0	-9.91597	1.62429e-15	-9.36694	1.67113e-207	234.776	0.211	0.605	0.25	+	hsa_circ_0001281	TCF3-PBX1
7:22330793-22357656	chr7	22330793	22357656	-2.63169	0.00329414	0.0922225	0.858168	RAPGEF5	ENSG00000136237	63.115	9.873	0.497	0.137	1.3896	3.0352	0.8424	0	7.7498	5.357	-5.47455	1.10903e-13	-2.528	8.92705e-15	90.371	1.87	0.374	0.063	-	hsa_circ_0001681	TCF3-PBX1
2:168986050-169038600	chr2	168986050	169038600	-5.54628	0.00350572	-2.62506	2.26e-16	STK39	ENSG00000198648	21.608	0	0.111	0	0.6948	0.2759	2.6208	1.6206	4.9317	0	-5.47577	6.97841e-08	-2.39083	1.51535e-20	46.74	1.202	0.272	0.017	-	hsa_circ_0001078	TCF3-PBX1
12:25216653-25222365	chr12	25216653	25222365	-3.99162	0.00363983	-2.64906	8.31e-19	LRMP	ENSG00000118308	41.55	3.2	0.007	0.003	2.5477	1.1037	4.9608	3.9358	7.2801	1.5306	-4.04535	1.74944e-11	-2.46999	2.71791e-35	94.176	5.762	0.005	0.004	+	hsa_circ_0025630	TCF3-PBX1
12:25232177-25243131	chr12	25232177	25243131	-3.53346	0.00451564	-2.64906	8.31e-19	LRMP	ENSG00000118308	39.966	4.082	0.007	0.004	0	0.2759	3.276	2.894	4.9317	0	-2.67105	5.24393e-08	-2.46999	2.71791e-35	96.172	15.258	0.005	0.01	NA	NA	TCF3-PBX1
12:25232177-25236427	chr12	25232177	25236427	-2.00073	0.00480177	-2.64906	8.31e-19	LRMP	ENSG00000118308	96.144	23.549	0.015	0.027	1.3896	1.3796	5.616	4.0515	11.5072	0	-2.35022	2.8247e-07	-2.46999	2.71791e-35	181.297	35.781	0.01	0.023	+	hsa_circ_0025633	TCF3-PBX1
13:78293666-78327493	chr13	78293666	78327493	-2.22617	0.00491456	-2.98103	6.87e-15	SLAIN1	ENSG00000139737	70.814	14.282	0.13	0.283	3.9373	3.0352	5.3352	4.6303	5.4013	2.2959	-1.02977	0.0499361	-2.34052	1.11186e-28	151.583	74.252	0.167	1.526	+	hsa_circ_0000497	TCF3-PBX1
18:13278103-13387761	chr18	13278103	13387761	-5.32635	0.00570281	-1.84591	4.72e-07	LDLRAD4	ENSG00000168675	20.261	0	16.373	0	0.6948	3.0352	0.1872	0.1158	0	0	-7.61278	5.06071e-08	-3.715	3.04467e-29	29.18	0	50.324	0	+	hsa_circ_0047037	TCF3-PBX1
22:26853824-26854543	chr22	26853824	26854543	-3.49244	0.00570281	-2.53685	1.33e-18	HPS4	ENSG00000100099	40.263	4.082	0.037	0.045	6.2533	12.6925	1.0296	0.463	1.6439	0.7653	-2.75187	6.24011e-05	-3.07473	1.98932e-41	51.683	7.542	0.032	0.098	-	hsa_circ_0005175	TCF3-PBX1
10:7285519-7327916	chr10	7285519	7327916	-3.17212	0.00672457	0.652261	0.210788	SFMBT2	ENSG00000198879	42.352	4.688	0.605	0.096	5.5585	12.9684	4.3056	0.5788	9.8633	19.1322	-1.75525	0.0279814	-0.524498	0.123564	47.441	14.164	0.432	0.338	-	hsa_circ_0017636	TCF3-PBX1
12:100166699-100175875	chr12	100166699	100175875	-9.34993	0.00672457	-9.21238	1.4e-06	ANKS1B	ENSG00000185046	632.545	1.177	0.888	1.88	0	0.5518	0	0	23.7189	0	-12.9724	2.29674e-29	-14.668	1.75155e-160	1188.01	0	0.653	0	-	hsa_circ_0007294	TCF3-PBX1
10:125798030-125806240	chr10	125798030	125806240	-4.61276	0.00701815	-3.58104	1.38e-21	CHST15	ENSG00000182022	40.586	1.563	0.085	0.053	3.0109	2.4833	6.3648	5.7879	4.9317	0	-3.33168	6.44316e-07	-1.30685	2.3162e-07	75.729	7.54	0.162	0.06	-	hsa_circ_0000264	TCF3-PBX1
10:15614209-15628663	chr10	15614209	15628663	-5.41847	0.00747988	-12.1837	1.63e-32	ITGA8	ENSG00000077943	19.838	0	0.041	0	0	0	0	0	1.409	0	-7.62129	0.0261991	-9.90947	2.03649e-11	29.134	0	0.012	0	NA	NA	TCF3-PBX1
2:106739425-106782539	chr2	106739425	106782539	-3.37791	0.00747988	-1.14382	0.000479149	UXS1	ENSG00000115652	34.529	3.291	23.294	0.025	1.8528	6.8981	2.4336	3.2412	5.6362	0.7653	-2.83759	1.08328e-05	-1.60124	3.95499e-15	63.49	8.878	88.586	0.036	-	hsa_circ_0055945	TCF3-PBX1
1:117944807-117984947	chr1	117944807	117984947	-1.87934	0.00775145	0.0307815	0.961277	MAN1A2	ENSG00000198162	219.674	59.902	1.169	0.357	8.5694	14.348	16.6607	19.9104	37.3397	11.4793	-1.73172	4.55629e-05	-0.345873	0.0742758	535.048	160.836	1.01	0.549	+	hsa_circ_0000119	TCF3-PBX1
12:459786-463400	chr12	459786	463400	-5.1777	0.00823494	0.303462	0.386209	KDM5A	ENSG00000073614	17.712	0	0.034	0	0.9264	1.1037	2.9952	2.4309	2.1136	1.9132	-2.65434	0.0001441	0.105009	0.593396	66.351	10.708	0.063	0.018	-	hsa_circ_0002881	TCF3-PBX1
13:21742126-21742538	chr13	21742126	21742538	-4.82473	0.00900278	-4.68168	7.24e-24	SKA3	ENSG00000165480	27.841	0.551	0.294	0.277	9.959	3.587	6.1776	2.894	2.5833	3.4438	-2.37412	0.000236708	-3.37224	6.786e-16	70.034	13.597	0.352	1.458	-	hsa_circ_0000467	TCF3-PBX1
9:103261046-103279053	chr9	103261046	103279053	-5.20319	0.0090406	NA	NA	MSANTD3-TMEFF1	ENSG00000251349	33.636	1.012	0.347	0.203	5.5585	1.1037	0.936	2.0836	28.6506	0	-3.08186	4.58803e-06	NA	NA	212.098	25.258	1.098	0.816	+	hsa_circ_0004425	TCF3-PBX1
19:58436990-58439415	chr19	58436990	58439415	-3.61958	0.00946542	-0.918311	0.0508777	ZNF418	ENSG00000196724	37.473	2.665	1.525	0.226	0.6948	0	0	0.8103	3.2878	1.1479	-3.52254	3.43065e-09	-0.594383	0.0216474	102.251	8.872	1.703	0.394	-	hsa_circ_0052318	TCF3-PBX1
6:151669845-151674887	chr6	151669845	151674887	-5.25241	0.00971923	-6.77344	6.54e-21	AKAP12	ENSG00000131016	20.239	0	0.032	0	5.0953	3.587	0	0	7.2801	0	-7.40383	1.62429e-15	-5.66423	1.23705e-15	135.317	0.873	0.092	0.051	+	hsa_circ_0078299	TCF3-PBX1
12:12397195-12397589	chr12	12397195	12397589	-4.69017	0.0102999	-2.62606	5.13e-17	LRP6	ENSG00000070018	24.199	0.551	0.239	0.094	3.4741	2.2074	5.0544	7.0612	5.4013	0.7653	-4.22789	2.0053e-11	-5.05434	5.92691e-59	80.35	4.322	0.422	1.403	-	hsa_circ_0000378	TCF3-PBX1
2:215617170-215661841	chr2	215617170	215661841	-4.40927	0.0118409	-1.92194	7.43e-05	BARD1	ENSG00000138376	33.79	1.563	0.172	0.047	1.8528	3.3111	7.3944	4.9776	5.1665	3.8264	-2.46714	0.00022642	-1.58904	5.50276e-22	66.309	11.976	0.199	0.145	-	hsa_circ_0002999	TCF3-PBX1
18:13387339-13387761	chr18	13387339	13387761	-5.36599	0.0120761	-1.84591	4.72e-07	LDLRAD4	ENSG00000168675	21.513	0	6.031	0	0	0.8278	0.1872	0.3473	0.2348	0	-6.92669	0.0219001	-3.715	3.04467e-29	18.018	0	29.964	0	+	hsa_circ_0000834	TCF3-PBX1
8:28570973-28575724	chr8	28570973	28575724	-5.07887	0.0120761	-2.7027	1.51e-09	EXTL3	ENSG00000012232	17.415	0	0.106	0	0.9264	0	0.468	1.1576	5.4013	0.3826	-4.01898	0.000460788	-2.23087	1.87959e-12	29.362	1.841	0.147	0.081	+	hsa_circ_0003885	TCF3-PBX1
10:15590453-15634303	chr10	15590453	15634303	-5.11217	0.0123658	-12.1837	1.63e-32	ITGA8	ENSG00000077943	16.94	0	0.038	0	0	0	0	0	5.4013	0	-8.10494	3.93016e-08	-9.90947	2.03649e-11	40.647	0	0.019	0	NA	NA	TCF3-PBX1
11:36248634-36248980	chr11	36248634	36248980	-5.02254	0.0127829	-8.23716	8.76e-29	LDLRAD3	ENSG00000179241	15.289	0	0.173	0	0	3.3111	0.3744	2.0836	3.5226	0.7653	-4.19087	1.59149e-05	-5.84539	6.66251e-67	57.505	3.327	0.376	2.371	+	hsa_circ_0006988	TCF3-PBX1
3:138289159-138291826	chr3	138289159	138291826	-4.99028	0.0127829	-3.1664	7.61e-13	CEP70	ENSG00000114107	15.81	0	0.104	0	1.6212	1.1037	1.5912	3.0097	3.9923	0	-2.24609	0.0139807	-1.47164	2.44615e-10	34.617	7.38	0.103	0.251	-	hsa_circ_0003823	TCF3-PBX1
7:43436412-43447330	chr7	43436412	43447330	-5.279	0.0131932	-8.02396	6.65e-06	HECW1	ENSG00000002746	18.809	0	0.252	0	0	0	0	0.2315	0.4697	0	-6.19077	0.00180575	-11.8204	4.0307e-75	10.96	0	0.085	0	+	hsa_circ_0008258	TCF3-PBX1
18:13278103-13438383	chr18	13278103	13438383	-4.69759	0.0140112	-1.84591	4.72e-07	LDLRAD4	ENSG00000168675	27.117	1.177	10.635	1.88	0.2316	4.4148	0.1872	0	0.7045	0	-7.84521	6.73872e-07	-3.715	3.04467e-29	34.38	0	52.704	0	+	hsa_circ_0047038	TCF3-PBX1
20:62407030-62422143	chr20	62407030	62422143	-3.35496	0.0149274	-3.05181	0.00157641	ZBTB46	ENSG00000130584	42.559	4.008	1.228	1.125	2.316	0	0	0.1158	1.1742	1.1479	-5.8445	5.57163e-07	-5.06213	1.43861e-37	40.368	0.535	8.494	0.321	-	hsa_circ_0002805	TCF3-PBX1
10:116879948-116975638	chr10	116879948	116975638	-5.18678	0.0166035	-6.43865	6.06e-75	ATRNL1	ENSG00000107518	18.926	0	0.061	0	0	1.3796	0.8424	1.1576	0	0	-6.80956	1.41684e-05	NA	NA	16.453	0	0.036	0	NA	NA	TCF3-PBX1
7:121753171-121773795	chr7	121753171	121773795	-4.9206	0.0166035	-3.21425	1.07e-19	AASS	ENSG00000008311	15.544	0	0.054	0	0.9264	1.3796	2.7144	3.2412	0.7045	0	-6.02989	1.96728e-09	-3.83364	8.17886e-34	70.74	0.958	0.104	0.032	-	hsa_circ_0006919	TCF3-PBX1
7:22306582-22357656	chr7	22306582	22357656	-4.51069	0.0174772	0.0922225	0.858168	RAPGEF5	ENSG00000136237	23.127	1.012	0.171	0.012	0.2316	1.9315	0.5616	0	3.5226	0	-4.39524	2.67837e-05	-2.528	8.92705e-15	30.864	1.566	0.124	0.059	-	hsa_circ_0079557	TCF3-PBX1
22:47022647-47033857	chr22	47022647	47033857	-2.68917	0.0225536	-2.42957	1.76e-06	GRAMD4	ENSG00000075240	41.376	6.822	0.054	0.058	1.8528	3.0352	2.7144	0.3473	1.1742	0	-3.59471	3.84711e-11	-2.20437	2.45332e-14	111.402	9.411	0.108	0.067	+	hsa_circ_0001250	TCF3-PBX1
12:1136913-1137738	chr12	1136913	1137738	-3.09563	0.0237007	0.0979503	0.830463	ERC1	ENSG00000082805	30.084	2.756	0.3	0.053	3.7057	3.3111	3.8376	3.4727	6.8104	0.3826	-2.12483	0.000619424	-0.280012	0.271896	55.189	12.693	0.209	0.118	+	hsa_circ_0000373	TCF3-PBX1
7:127013395-127017383	chr7	127013395	127017383	-4.18685	0.0244619	1.49381	6.87e-07	ZNF800	ENSG00000048405	30.361	1.102	0.148	0.005	0.9264	0.5518	6.7392	2.3152	1.1742	1.5306	-2.26079	0.0231545	1.05326	0.00664457	31.484	6.328	0.085	0.016	-	hsa_circ_0082096	TCF3-PBX1
22:26304288-26346416	chr22	26304288	26346416	-5.10254	0.0259355	-6.96713	1.08e-05	MYO18B	ENSG00000133454	15.669	0	0.065	0	0.2316	4.6907	2.9952	0	0	0	-6.52512	0.00050929	-8.13735	4.34906e-11	13.391	0	0.079	0	NA	NA	TCF3-PBX1
19:4950622-4951008	chr19	4950622	4951008	-4.73365	0.027636	-7.99076	4e-51	UHRF1	ENSG00000034063	12.682	0	0.006	0	5.0953	6.0703	1.0296	2.4309	5.871	0.7653	-4.89667	0.000735594	-9.0597	9.22637e-80	19.015	0.722	0.01	0.454	+	hsa_circ_0002185	TCF3-PBX1
18:13387339-13438383	chr18	13387339	13438383	-4.90268	0.0276979	-1.84591	4.72e-07	LDLRAD4	ENSG00000168675	15.811	0	1.429	0	0	2.2074	0	0	0.7045	0	-6.92445	0.0220061	-3.715	3.04467e-29	18.002	0	29.433	0	+	hsa_circ_0047040	TCF3-PBX1
5:80911291-80946158	chr5	80911291	80946158	-2.78877	0.0276979	-1.41385	4.39e-06	SSBP2	ENSG00000145687	28.912	4.303	0.014	0.021	1.6212	4.4148	3.9312	1.3891	0.7045	0	-2.16769	0.049601	-2.60473	9.025e-29	32.878	7.344	0.007	0.02	-	hsa_circ_0073222	TCF3-PBX1
1:2066700-2087531	chr1	2066700	2087531	-4.91745	0.0286395	-5.02032	6.22e-24	PRKCZ	ENSG00000067606	16.259	0	0.008	0	0	0	0	0	0	0	-4.97603	0.027962	-4.74735	2.15776e-88	7.853	0.241	0.002	0.006	+	hsa_circ_0009366	TCF3-PBX1
18:9583114-9595151	chr18	9583114	9595151	-2.42377	0.0298448	0.127237	0.765455	PPP4R1	ENSG00000154845	39.761	7.263	0.119	0.057	0.2316	0.5518	4.3056	4.1673	6.5755	1.1479	-1.46286	0.00532594	-0.619754	1.04369e-06	91.647	33.386	0.139	0.177	-	hsa_circ_0007509	TCF3-PBX1
21:46548316-46554747	chr21	46548316	46554747	-1.96924	0.0298448	0.361873	0.552956	ADARB1	ENSG00000197381	95.887	23.717	0.468	0.166	0.9264	5.5185	25.6463	4.2831	20.666	1.1479	-2.35825	9.35225e-05	-0.785926	0.115872	233.777	45.531	0.914	1.358	+	hsa_circ_0005037	TCF3-PBX1
2:168994597-169023917	chr2	168994597	169023917	-4.82491	0.0301073	-2.62506	2.26e-16	STK39	ENSG00000198648	12.684	0	0.075	0	0.6948	0.2759	0.468	0.3473	0.9394	0	-3.65433	0.0287992	-2.39083	1.51535e-20	14.771	1.044	0.056	0.017	-	hsa_circ_0003120	TCF3-PBX1
10:125780771-125806240	chr10	125780771	125806240	-4.6106	0.0359041	-3.58104	1.38e-21	CHST15	ENSG00000182022	12.504	0	0.026	0	0.4632	0.5518	1.0296	0.9261	1.6439	0	-3.16234	0.0286381	-1.30685	2.3162e-07	10.792	1.229	0.024	0.011	-	hsa_circ_0020304	TCF3-PBX1
18:18571136-18600200	chr18	18571136	18600200	-4.64204	0.0366714	0.958849	0.00663097	ROCK1	ENSG00000067900	12.315	0	0.023	0	0	0.5518	0.2808	0.463	0.2348	0	-2.62471	0.0311837	-0.485086	0.00780896	21.231	3.443	0.02	0.008	NA	NA	TCF3-PBX1
10:116879948-116925405	chr10	116879948	116925405	-4.15196	0.0372966	-6.43865	6.06e-75	ATRNL1	ENSG00000107518	17.09	1.177	0.118	0.174	1.8528	1.6555	4.4928	1.9679	0	0	-5.8989	2.01536e-06	NA	NA	35.65	0.634	0.079	0.068	+	hsa_circ_0020094	TCF3-PBX1
4:178274461-178281831	chr4	178274461	178281831	-2.25921	0.0397169	-3.81685	1.45e-15	NEIL3	ENSG00000109674	40.044	8.476	0.665	3.438	3.4741	3.0352	4.5864	7.64	5.1665	4.5917	-2.31685	0.000163297	-2.63383	4.1965e-06	105.393	21.314	1.034	4.86	+	hsa_circ_0001460	TCF3-PBX1
6:22056774-22063469	chr6	22056774	22063469	-4.65559	0.041072	-5.85275	7.51e-20	CASC15	ENSG00000272168	13.168	0	0.065	0	0.6948	0	0	0.3473	5.4013	0	-7.61462	4.90714e-08	-7.00642	9.08074e-119	28.928	0	0.066	0	NA	NA	TCF3-PBX1
2:169018296-169023917	chr2	169018296	169023917	-3.45545	0.0413857	-2.62506	2.26e-16	STK39	ENSG00000198648	24.513	1.654	0.102	0.023	3.9373	0	1.1232	1.7364	2.1136	0	-2.63506	5.13176e-05	-2.39083	1.51535e-20	57.548	9.336	0.33	0.126	-	hsa_circ_0007082	TCF3-PBX1
X:24190831-24197887	chrX	24190831	24197887	-1.95499	0.0413931	0.126107	0.826525	ZFX	ENSG00000005889	59.449	15.057	0.175	0.075	2.5477	1.9315	15.1631	7.0612	2.8181	2.2959	-1.45072	0.00956336	0.400428	0.178302	92.472	33.768	0.138	0.076	+	hsa_circ_0007108	TCF3-PBX1
13:111857635-111896641	chr13	111857635	111896641	-4.57584	0.0421232	1.45091	0.00582525	ARHGEF7	ENSG00000102606	11.323	0	0.036	0	0	0.5518	0.6552	0.3473	0.2348	0.3826	-3.05749	0.00459721	-0.859102	0.0257047	27.259	3.156	0.051	0.02	+	hsa_circ_0002680	TCF3-PBX1
3:125032151-125050082	chr3	125032151	125050082	-1.90576	0.0423041	0.402873	0.311673	ZNF148	ENSG00000163848	46.204	11.617	0.209	0.058	9.0326	3.8629	18.6263	10.7655	13.1511	17.6016	-1.08246	0.0490951	0.0663053	0.64199	126.924	60.053	0.41	0.161	-	hsa_circ_0001333	TCF3-PBX1
6:22020567-22056919	chr6	22020567	22056919	-4.54595	0.0429504	-5.85275	7.51e-20	CASC15	ENSG00000272168	10.762	0	0.077	0	0.9264	0	0	0	2.1136	0	-7.04932	4.88797e-06	-7.00642	9.08074e-119	19.73	0	0.044	0	+	hsa_circ_0075829	TCF3-PBX1
2:153431649-153437563	chr2	153431649	153437563	-4.45499	0.0432563	-4.58704	6.45e-26	FMNL2	ENSG00000157827	11.011	0	0.067	0	2.0844	0.5518	1.404	1.0418	2.1136	0.3826	-5.97459	0.00487886	-3.94237	4.56991e-46	9.301	0	0.086	0	NA	NA	TCF3-PBX1
1:117944807-117963271	chr1	117944807	117963271	-1.31581	0.0434791	0.0307815	0.961277	MAN1A2	ENSG00000198162	516.038	208.309	2.818	1.241	31.2666	33.6626	84.4269	90.7544	99.3377	34.8205	-1.54065	0.000206255	-0.345873	0.0742758	1701.92	584.928	3.256	1.971	+	hsa_circ_0000118	TCF3-PBX1
12:100166699-100219167	chr12	100166699	100219167	-4.81854	0.0448654	-9.21238	1.4e-06	ANKS1B	ENSG00000185046	13.347	0	0.02	0	0	0	0	0	0.7045	0	-8.24241	3.69898e-10	-14.668	1.75155e-160	44.822	0	0.025	0	NA	NA	TCF3-PBX1
12:133383762-133398897	chr12	133383762	133398897	-4.5411	0.0450518	-2.63309	2.46e-06	GOLGA3	ENSG00000090615	12.74	0	0.011	0	0.4632	0	0	0	0	0.3826	-4.31299	0.00210324	-2.62376	8.78686e-22	15.191	0.748	0.008	0.007	-	hsa_circ_0002071	TCF3-PBX1
5:14673750-14681716	chr5	14673750	14681716	-4.602	0.0465187	0.539105	0.126205	FAM105B	ENSG00000154124	12.305	0	0.054	0	0.4632	1.1037	0	1.3891	0.7045	1.1479	-4.20625	0.00449539	0.0382372	0.887714	14.55	0.824	0.044	0.007	+	hsa_circ_0005145	TCF3-PBX1

## Sheet: Table S2_circRNAs_downregulated
circRNA	chr	start	stop	logfc.discovery	padj.discovery	logfc.gene.discovery	padj.gene.discovery	symbol	gene_name	discovery_mean_norm_cases	discovery_mean_norm_controls	discovery_mean_circscore_cases	discovery_mean_circscore_controls	REH.juncNorm	NALM6.juncNorm	RS411.juncNorm	SEM.juncNorm	697.juncNorm	GM12878.juncNorm	logfc.replication	padj.replication	logfc.gene.replication	padj.gene.replication	replication_mean_norm_cases	replication_mean_norm_controls	replication_mean_circscore_cases	replication_mean_circscore_controls	strand	known_name	subtype
12:40696590-40697936	chr12	40696590	40697936	6.13184	1.07e-07	3.73385	3.42e-05	LRRK2	ENSG00000188906	0.934	45.172	0.135	0.164	0	0	0	0	0	0	7.08126	1.8578e-15	2.30243	NA	0.592	74.547	0.018	0.178	+	hsa_circ_0025887	DUX4-rearranged
12:46622935-46648719	chr12	46622935	46648719	3.18315	4.33e-06	1.08536	0.059346	SLC38A1	ENSG00000111371	9.011	72.917	0.048	0.092	0.2316	0	0.3744	2.3152	0.7045	1.5306	3.35918	6.15431e-14	0.999446	0.00299353	11.05	114.429	0.018	0.084	-	hsa_circ_0000397	DUX4-rearranged
21:34793786-34805178	chr21	34793786	34805178	5.03964	6.29e-06	1.97603	0.000954125	IFNGR2	ENSG00000159128	0.782	28.756	0.009	0.04	0.4632	0	0.2808	0.6945	0	0.7653	2.63118	1.58637e-05	NA	NA	7.082	45.687	0.027	0.051	+	hsa_circ_0002113	DUX4-rearranged
1:1158623-1159348	chr1	1158623	1159348	2.58121	7.44e-06	0.569376	0.249365	SDF4	ENSG00000078808	17.492	103.358	0.292	0.76	9.959	4.6907	5.8032	7.9873	11.2724	6.5049	1.64325	0.000415932	1.1162	0.00359331	46.029	144.536	0.857	1.291	-	hsa_circ_0000002	DUX4-rearranged
21:34804483-34805178	chr21	34804483	34805178	3.53447	1.13e-05	1.97603	0.000954125	IFNGR2	ENSG00000159128	7.323	81.416	0.082	0.121	5.5585	0	0.7488	0.463	0.2348	1.9132	2.17666	3.29257e-05	2.13182	3.3543e-11	18.023	80.52	0.067	0.084	+	hsa_circ_0001185	DUX4-rearranged
12:28408513-28412375	chr12	28408513	28412375	3.09677	4.19e-05	0.653519	0.101824	CCDC91	ENSG00000123106	9.799	78.215	0.113	0.35	1.158	1.1037	0.1872	1.0418	0	0.7653	3.83466	3.37366e-09	0.669737	0.000288608	11.893	162.443	0.029	0.525	+	hsa_circ_0000387	DUX4-rearranged
1:114372213-114377061	chr1	114372213	114377061	2.94842	6.62e-05	1.58729	0.0138608	PTPN22	ENSG00000134242	11.53	80.247	0.438	0.476	0.6948	0	0	0.6945	0	3.4438	1.73668	0.0376518	1.5435	0.00442724	28.212	93.775	0.362	0.473	-	hsa_circ_0000110	DUX4-rearranged
3:149563797-149639014	chr3	149563797	149639014	2.14038	0.00013013	1.04911	0.00343249	RNF13	ENSG00000082996	27.624	125.744	0.734	0.466	3.2425	2.2074	2.808	3.5885	0.7045	6.5049	2.04143	1.52164e-07	1.19787	0.000224012	67.571	280.245	0.3	0.847	+	hsa_circ_0001346	DUX4-rearranged
2:231134246-231152681	chr2	231134246	231152681	6.60675	0.000258999	5.7045	3.96e-10	SP140	ENSG00000079263	0	13.699	0	0.025	0	0	0	0	0	0.7653	3.43827	0.00776378	4.23951	4.38761e-08	1.582	18.405	0.121	0.016	NA	NA	DUX4-rearranged
5:122881110-122893258	chr5	122881110	122893258	1.99351	0.000303625	1.58665	0.000108085	CSNK1G3	ENSG00000151292	111.35	443.915	1.379	1.188	7.4114	4.9666	13.0104	15.9746	14.3253	4.5917	2.41255	3.82277e-15	1.7812	8.62889e-35	185.194	985.345	1.347	2.333	+	hsa_circ_0001522	DUX4-rearranged
X:100296305-100297301	chrX	100296305	100297301	2.80784	0.000748253	0.157154	0.800251	TRMT2B	ENSG00000188917	9.039	53.994	0.145	0.457	0	0	0.0936	0.2315	0.2348	0	4.52771	2.22949e-11	1.4348	1.98825e-11	3.755	81.842	0.036	0.308	-	hsa_circ_0001937	DUX4-rearranged
14:71880664-71996087	chr14	71880664	71996087	2.9373	0.000770873	2.90445	2.1e-11	SIPA1L1	ENSG00000197555	5.682	40.331	0.48	2.021	0.6948	0.2759	0.1872	1.3891	0.4697	5.7396	5.08082	2.60373e-30	2.83447	7.80428e-16	5.811	189.702	0.476	12.621	NA	NA	DUX4-rearranged
7:22999874-23030758	chr7	22999874	23030758	2.6479	0.000770873	1.32937	7.12e-06	FAM126A	ENSG00000122591	8.19	54.737	0.246	0.308	1.8528	1.3796	1.3104	1.8521	1.409	3.4438	1.68699	0.000121234	1.62788	4.81442e-15	39.256	126.544	0.398	0.551	-	hsa_circ_0008951	DUX4-rearranged
8:37971709-37976881	chr8	37971709	37976881	2.83912	0.00131908	-1.21578	0.00115318	ASH2L	ENSG00000129691	7.948	54.977	0.089	1.197	0.9264	1.6555	1.7784	1.6206	1.6439	3.8264	1.7284	1.57779e-05	-0.328136	0.0426804	32.021	106.591	0.179	0.788	+	hsa_circ_0001790	DUX4-rearranged
3:31917924-31921322	chr3	31917924	31921322	4.82347	0.00168634	4.39175	4.1e-08	OSBPL10	ENSG00000144645	0.745	22.54	0.043	0.073	0	0	0	0	0	0	7.76773	1.37937e-12	4.50334	1.28645e-10	0.182	54.696	0.042	0.105	-	hsa_circ_0008549	DUX4-rearranged
4:25848915-25849486	chr4	25848915	25849486	5.16763	0.00228412	4.64078	1.02e-11	SEL1L3	ENSG00000091490	0.84	16.879	0.059	0.026	0	0	0.1872	0	0	0	5.99803	5.41449e-11	4.84058	5.7188e-15	0.678	42.973	0.024	0.026	NA	NA	DUX4-rearranged
2:231120166-231152681	chr2	231120166	231152681	5.2453	0.00230201	5.7045	3.96e-10	SP140	ENSG00000079263	0.678	17.761	0.022	0.034	0	0	0	0	0	1.1479	6.36746	1.51898e-11	4.23951	4.38761e-08	0.773	48.838	0.069	0.042	NA	NA	DUX4-rearranged
3:57276883-57282379	chr3	57276883	57282379	2.55418	0.00230201	0.95042	0.0369424	APPL1	ENSG00000157500	9.052	54.986	0.092	0.122	1.158	0.8278	1.872	1.6206	2.5833	3.8264	2.27692	6.80239e-05	0.926038	7.83724e-27	28.765	138.846	0.074	0.184	+	hsa_circ_0001317	DUX4-rearranged
3:71064699-71102924	chr3	71064699	71102924	3.78068	0.00230201	2.36968	5.23e-11	FOXP1	ENSG00000114861	1.462	23.646	0.018	0.024	0.2316	0	0.1872	0	0.7045	0	2.19115	0.00760084	1.35995	3.57048e-07	10.482	47.844	0.049	0.099	-	hsa_circ_0001320	DUX4-rearranged
5:56160560-56161804	chr5	56160560	56161804	2.56089	0.00284695	2.42577	4.64e-05	MAP3K1	ENSG00000095015	20.971	130.798	0.544	0.167	0.2316	0	6.552	7.5243	24.6583	1.9132	1.96405	3.65144e-05	2.11104	4.32721e-12	90.405	354.95	0.331	0.216	+	hsa_circ_0001485	DUX4-rearranged
15:31266516-31269158	chr15	31266516	31269158	3.92896	0.00465461	0.980797	0.0296987	MTMR10	ENSG00000166912	1.852	24.324	0.019	0.083	0	0	0.0936	0.5788	0	0	2.3858	0.000351181	0.794256	0.000605404	7.359	38.964	0.047	0.141	NA	NA	DUX4-rearranged
2:54278094-54284497	chr2	54278094	54284497	3.17456	0.00565859	1.14947	0.0194248	ACYP2	ENSG00000170634	3.621	28.237	0.149	0.33	0.4632	0.2759	0	0.2315	0	0	3.31625	0.000182504	1.51126	1.46483e-12	3.099	28.607	0.109	0.323	+	hsa_circ_0004462	DUX4-rearranged
9:14639893-14662324	chr9	14639893	14662324	4.08023	0.00594778	2.00428	4.91e-07	ZDHHC21	ENSG00000175893	1.119	20.301	0.052	0.07	0	0	0.0936	0.2315	0	0.3826	5.0359	4.84304e-09	1.37918	6.06449e-11	1.077	38.558	0.016	0.142	NA	NA	DUX4-rearranged
4:114452371-114469885	chr4	114452371	114469885	5.1888	0.00901889	5.75482	2.29e-19	CAMK2D	ENSG00000145349	0.449	11.526	0.021	0.014	0	0	2.7144	2.0836	0.2348	0.3826	7.36645	2.03403e-09	4.81957	7.98744e-15	0	21.162	0	0.032	-	hsa_circ_0008026	DUX4-rearranged
7:74578130-74578824	chr7	74578130	74578824	5.62264	0.0097671	NA	NA	NCF1C	ENSG00000262960	0.085	9.707	0.018	0.018	0	0	0.0936	0	0	1.9132	3.86787	0.0324333	2.48586	0.00171173	0.546	8.873	0.013	0.012	NA	NA	DUX4-rearranged
21:37619814-37620866	chr21	37619814	37620866	1.71673	0.0124316	1.67837	0.000283	DOPEY2	ENSG00000142197	43.784	147.572	3.226	0.922	3.9373	6.0703	1.9656	3.357	2.3484	0.3826	2.16813	1.8971e-08	2.13535	1.11085e-34	59.549	267.828	2.893	2.101	+	hsa_circ_0001187	DUX4-rearranged
2:231222519-231226412	chr2	231222519	231226412	2.61363	0.0172384	2.25749	5.41e-07	SP140L	ENSG00000185404	7.666	39.854	0.156	0.089	0.2316	0	0.6552	0.2315	0.7045	0.3826	3.28486	2.82257e-06	1.45241	1.66759e-06	7.679	77.591	0.027	0.137	+	hsa_circ_0008382	DUX4-rearranged
12:31595708-31600703	chr12	31595708	31600703	3.56513	0.0205103	3.8694	1.98e-06	DENND5B	ENSG00000170456	1.803	17.648	0.343	0.08	0	0.2759	0.0936	0.463	0.7045	1.1479	3.97373	1.03737e-06	3.57442	1.44936e-14	2.846	44.757	0.122	0.153	-	hsa_circ_0008445	DUX4-rearranged
4:103501691-103504114	chr4	103501691	103504114	2.50924	0.0205103	2.52767	6.25e-11	NFKB1	ENSG00000109320	5.701	31.224	0.075	0.072	0.2316	0.5518	0.0936	0.3473	1.409	0.3826	2.13241	0.0118485	0.372116	0.103289	6.428	29.423	0.028	0.087	NA	NA	DUX4-rearranged
19:45528586-45528995	chr19	45528586	45528995	2.81544	0.0229931	2.4218	NA	RELB	ENSG00000104856	4.819	35.062	0.469	0.207	0.9264	1.6555	0.468	0.9261	0.2348	2.6785	4.13195	0.000387398	3.81542	2.27058e-17	1.232	16.206	0.16	0.197	+	hsa_circ_0008590	DUX4-rearranged
10:52193235-52350007	chr10	52193235	52350007	2.74002	0.0259907	1.84109	3.06e-12	SGMS1	ENSG00000198964	5.016	34.106	0.174	0.259	0.2316	0	1.2168	1.2733	1.1742	0.3826	1.61339	0.00609679	1.27759	0.000179393	17.174	52.794	0.27	0.44	-	hsa_circ_0018401	DUX4-rearranged
2:190584297-190585513	chr2	190584297	190585513	3.70356	0.0268127	1.13751	0.0412134	ANKAR	ENSG00000151687	2.261	20.994	0.324	0.82	0	0	0	0	0	0	3.74022	1.68946e-07	1.44917	3.12299e-08	3.178	41.086	0.188	1.043	NA	NA	DUX4-rearranged
1:178745816-178754742	chr1	178745816	178754742	4.69354	0.0290069	4.65883	1.21e-13	RALGPS2	ENSG00000116191	0.331	9.707	0.006	0.005	0.4632	0	0.3744	0	0	0	6.11209	4.713e-06	3.87718	1.02837e-40	0.292	17.26	0.002	0.007	+	hsa_circ_0000162	DUX4-rearranged
10:111883774-111890244	chr10	111883774	111890244	2.50327	0.0291384	1.81724	6.28e-05	ADD3	ENSG00000148700	5.618	33.574	0.044	0.034	2.5477	0	0.7488	1.0418	0.2348	0	2.47154	3.7385e-08	1.70849	3.64804e-09	13.64	76.124	0.036	0.048	+	hsa_circ_0003357	DUX4-rearranged
17:40652724-40653322	chr17	40652724	40653322	5.48153	0.0387676	3.50731	1.05e-05	ATP6V0A1	ENSG00000033627	0.034	8.55	0.011	0.065	0	0	0	0	0	1.5306	4.42804	0.00664403	2.41891	0.00358902	1.557	35.353	0.151	0.48	+	hsa_circ_0008179	DUX4-rearranged
9:14639893-14680160	chr9	14639893	14680160	1.88689	0.0406548	2.00428	4.91e-07	ZDHHC21	ENSG00000175893	25.162	90.298	1.518	0.347	0	0	0.7488	1.9679	0	4.2091	2.96418	0.00538783	1.37918	6.06449e-11	26.015	203.057	0.35	0.745	-	hsa_circ_0008952	DUX4-rearranged
12:28378727-28412375	chr12	28378727	28412375	1.79005	0.0411506	0.653519	0.101824	CCDC91	ENSG00000123106	49.654	164.76	0.524	0.828	1.6212	4.4148	1.3104	2.0836	0	0.7653	3.87411	9.06962e-16	0.669737	0.000288608	34.804	519.068	0.098	1.657	+	hsa_circ_0000386	DUX4-rearranged
1:15964801-15970145	chr1	15964801	15970145	2.12056	0.041552	1.19825	0.00462114	DDI2	ENSG00000197312	10.289	43.888	0.166	0.264	1.6212	2.2074	1.0296	1.8521	0.9394	1.5306	1.32429	0.0130487	0.0180874	0.939174	29.317	74.492	0.271	0.571	+	hsa_circ_0000019	DUX4-rearranged
3:56661064-56662642	chr3	56661064	56662642	1.66627	0.0425996	-0.208786	0.681501	FAM208A	ENSG00000163946	29.734	91.962	0.22	0.346	0.6948	1.1037	1.5912	2.0836	2.1136	3.0611	2.26404	4.23586e-07	0.104081	0.42241	40.164	193.247	0.074	0.308	-	hsa_circ_0001314	DUX4-rearranged
15:44907560-44912601	chr15	44907560	44912601	2.30058	0.0472587	0.297607	0.442676	SPG11	ENSG00000104133	6.304	32.193	0.084	0.146	0.6948	2.4833	0.8424	0.6945	0	1.1479	2.37938	1.68193e-07	0.674777	0.00252644	18.311	94.932	0.073	0.226	-	hsa_circ_0003784	DUX4-rearranged
17:47388673-47389404	chr17	47388673	47389404	1.73391	0.0473999	1.28701	0.00305811	ZNF652	ENSG00000198740	24.638	81.073	3.174	0.938	2.316	2.2074	2.1528	1.2733	0.7045	2.6785	3.18678	2.18911e-06	0.7071	0.000328022	11.546	102.47	1.336	7.967	-	hsa_circ_0003258	DUX4-rearranged
22:26059596-26070495	chr22	26059596	26070495	2.13505	0.0496737	1.95964	0.000732981	ADRBK2	ENSG00000100077	10.301	42.338	0.146	0.09	0.4632	0.5518	0.468	0.2315	0	4.2091	2.24171	0.0164982	1.3239	0.000296709	6.97	33.68	0.028	0.048	+	hsa_circ_0062649	DUX4-rearranged
6:159197439-159210403	chr6	159197439	159210403	5.54107	2.73e-12	2.8464	3.3e-11	EZR	ENSG00000092820	0.928	43.015	0.003	0.011	0.2316	0	0.3744	1.2733	0	0.3826	4.13736	0.037505	2.6098	4.68468e-12	0.719	12.623	0.002	0.003	-	hsa_circ_0078538	ETV6-RUNX1_or_like
X:100296305-100297301	chrX	100296305	100297301	2.98497	2.73e-12	0.202728	0.538978	TRMT2B	ENSG00000188917	7.124	53.994	0.099	0.457	0	0	0.0936	0.2315	0.2348	0	4.04625	0.0206615	1.41162	1.5461e-10	4.879	81.842	0.072	0.308	-	hsa_circ_0001937	ETV6-RUNX1_or_like
5:122881110-122893258	chr5	122881110	122893258	2.24357	1.63e-10	2.00977	1.93e-08	CSNK1G3	ENSG00000151292	93.024	443.915	1.571	1.188	7.4114	4.9666	13.0104	15.9746	14.3253	4.5917	2.47542	0.0155124	1.59481	1.45211e-12	177.125	985.345	1.332	2.333	+	hsa_circ_0001522	ETV6-RUNX1_or_like
10:70719561-70720005	chr10	70719561	70720005	2.05484	2.06e-08	3.06707	1.31e-17	DDX21	ENSG00000165732	17.629	75.797	0.114	0.037	5.3269	5.7944	2.1528	1.9679	1.1742	10.714	2.11442	0.0423049	0.887214	1.76173e-05	21.057	91.152	0.042	0.087	+	hsa_circ_0008865	ETV6-RUNX1_or_like
12:40696590-40697936	chr12	40696590	40697936	6.25919	3.72e-08	3.96123	1.2e-05	LRRK2	ENSG00000188906	0.61	45.172	0.041	0.164	0	0	0	0	0	0	5.78331	0.00488183	1.01095	0.367518	1.488	74.547	0.005	0.178	+	hsa_circ_0025887	ETV6-RUNX1_or_like
2:190584297-190585513	chr2	190584297	190585513	3.7391	2.11e-06	1.73413	1.67e-06	ANKAR	ENSG00000151687	1.861	20.994	0.388	0.82	0	0	0	0	0	0	6.98822	1.55206e-05	1.59551	6.47361e-18	0.25	41.086	0.027	1.043	NA	NA	ETV6-RUNX1_or_like
5:56160560-56161804	chr5	56160560	56161804	2.99512	2.14e-06	2.70906	2.41e-08	MAP3K1	ENSG00000095015	16.328	130.798	0.248	0.167	0.2316	0	6.552	7.5243	24.6583	1.9132	2.66931	0.0407628	2.40364	5.92045e-05	55.594	354.95	0.359	0.216	+	hsa_circ_0001485	ETV6-RUNX1_or_like
2:231222519-231226412	chr2	231222519	231226412	2.78071	6.77e-06	2.51767	3.24e-13	SP140L	ENSG00000185404	6.223	39.854	0.115	0.089	0.2316	0	0.6552	0.2315	0.7045	0.3826	3.74961	0.010392	1.39785	2.87402e-05	5.725	77.591	0.03	0.137	+	hsa_circ_0008382	ETV6-RUNX1_or_like
3:31917924-31921322	chr3	31917924	31921322	4.90911	1.19e-05	5.07208	4.85e-12	OSBPL10	ENSG00000144645	0.752	22.54	0.083	0.073	0	0	0	0	0	0	8.60893	5.96746e-08	4.30805	5.07004e-10	0	54.696	0	0.105	-	hsa_circ_0008549	ETV6-RUNX1_or_like
2:54278094-54284497	chr2	54278094	54284497	2.84228	1.88e-05	1.21906	1.23e-05	ACYP2	ENSG00000170634	4.067	28.237	0.168	0.33	0.4632	0.2759	0	0.2315	0	0	4.20837	0.0442292	1.20892	3.70804e-05	1.503	28.607	0.064	0.323	+	hsa_circ_0004462	ETV6-RUNX1_or_like
7:87068982-87069718	chr7	87068982	87069718	4.68146	2.68e-05	4.95319	2.6e-08	ABCB4	ENSG00000005471	0.823	20.501	0.224	0.152	0	0	0.1872	0	0.2348	0	4.71719	0.0224707	3.62764	4.42798e-05	1.657	46.621	0.061	0.18	-	hsa_circ_0080960	ETV6-RUNX1_or_like
7:18705835-18706099	chr7	18705835	18706099	3.51965	0.00026866	3.29615	5.03e-14	HDAC9	ENSG00000048052	1.993	22.116	0.082	0.082	1.158	1.6555	4.68	1.7364	5.6362	0	4.15899	0.0134903	2.32898	0.000166661	3.021	55.466	0.062	0.099	+	hsa_circ_0007904	ETV6-RUNX1_or_like
1:178745816-178754742	chr1	178745816	178754742	4.34218	0.000301315	4.02083	2.27e-33	RALGPS2	ENSG00000116191	0.44	9.707	0.005	0.005	0.4632	0	0.3744	0	0	0	6.11555	0.00153391	3.12415	4.88135e-19	0.146	17.26	0.001	0.007	+	hsa_circ_0000162	ETV6-RUNX1_or_like
14:71880664-71996087	chr14	71880664	71996087	2.00047	0.000396669	2.0357	4.76e-09	SIPA1L1	ENSG00000197555	10.712	40.331	1.601	2.021	0.6948	0.2759	0.1872	1.3891	0.4697	5.7396	4.49934	0.00047779	1.77757	7.36037e-11	8.288	189.702	0.24	12.621	NA	NA	ETV6-RUNX1_or_like
2:231120166-231152681	chr2	231120166	231152681	4.6261	0.000917635	4.8233	3.6e-10	SP140	ENSG00000079263	0.809	17.761	0.083	0.034	0	0	0	0	0	1.1479	8.44701	1.2196e-07	2.93453	0.00368155	0	48.838	0	0.042	NA	NA	ETV6-RUNX1_or_like
12:28378727-28412375	chr12	28378727	28412375	1.69262	0.00125107	0.921729	0.00441047	CCDC91	ENSG00000123106	51.12	164.76	0.609	0.828	1.6212	4.4148	1.3104	2.0836	0	0.7653	3.24132	0.00240496	0.634359	0.0130786	54.873	519.068	0.192	1.657	+	hsa_circ_0000386	ETV6-RUNX1_or_like
15:44907560-44912601	chr15	44907560	44912601	2.16085	0.0019268	0.745264	0.00366055	SPG11	ENSG00000104133	7.319	32.193	0.089	0.146	0.6948	2.4833	0.8424	0.6945	0	1.1479	3.13392	0.0117905	1.20477	1.70719e-28	10.736	94.932	0.078	0.226	-	hsa_circ_0003784	ETV6-RUNX1_or_like
5:122881110-122888841	chr5	122881110	122888841	2.56781	0.00478442	2.00977	1.93e-08	CSNK1G3	ENSG00000151292	2.862	17.872	0.049	0.046	0.2316	0	0.7488	0.6945	0.7045	0	3.61846	0.0258791	1.59481	1.45211e-12	3.04	38.712	0.019	0.095	NA	NA	ETV6-RUNX1_or_like
9:14639893-14680160	chr9	14639893	14680160	3.02044	0.00478442	3.33201	2.44e-05	ZDHHC21	ENSG00000175893	10.966	90.298	0.555	0.347	0	0	0.7488	1.9679	0	4.2091	4.42421	0.00204102	3.20562	4.88025e-05	9.589	203.057	0.753	0.745	-	hsa_circ_0008952	ETV6-RUNX1_or_like
4:42505466-42526864	chr4	42505466	42526864	3.06603	0.00746351	2.5367	7.77e-14	ATP8A1	ENSG00000124406	2.214	18.017	0.035	0.035	0.2316	2.2074	0.3744	0.5788	0.4697	1.5306	3.8883	0.0292315	1.46501	2.24966e-06	2.765	43.021	0.022	0.063	-	hsa_circ_0069612	ETV6-RUNX1_or_like
19:45528586-45528995	chr19	45528586	45528995	2.96777	0.00806992	3.12718	1.02e-08	RELB	ENSG00000104856	4.766	35.062	0.333	0.207	0.9264	1.6555	0.468	0.9261	0.2348	2.6785	4.62229	0.0188432	3.40125	3.66886e-09	0.703	16.206	0.149	0.197	+	hsa_circ_0008590	ETV6-RUNX1_or_like
20:30904020-30904677	chr20	30904020	30904677	1.86329	0.00993229	0.76091	0.00291767	KIF3B	ENSG00000101350	7.163	25.423	0.337	0.415	1.158	0.8278	0.468	1.3891	0.2348	0.7653	4.02376	0.0219759	1.62685	6.54727e-14	6.199	102.097	0.166	0.902	+	hsa_circ_0002302	ETV6-RUNX1_or_like
9:14639893-14662324	chr9	14639893	14662324	3.83179	0.0137147	3.33201	2.44e-05	ZDHHC21	ENSG00000175893	1.34	20.301	0.059	0.07	0	0	0.0936	0.2315	0	0.3826	7.27338	1.13436e-05	3.20562	4.88025e-05	0.323	38.558	0.004	0.142	NA	NA	ETV6-RUNX1_or_like
12:90049455-90049884	chr12	90049455	90049884	2.73146	0.0234884	3.82994	1.07e-15	ATP2B1	ENSG00000070961	2.438	15.994	0.063	0.017	0.2316	1.1037	0.468	0.5788	0.4697	1.9132	4.41765	0.0137217	2.43769	1.87436e-09	1.284	27.918	0.015	0.037	-	hsa_circ_0007621	ETV6-RUNX1_or_like
2:128093445-128100770	chr2	128093445	128100770	2.31819	0.0289158	2.05807	1.1e-17	MAP3K2	ENSG00000169967	2.782	15.576	0.028	0.024	0	0	0.0936	0	0.4697	0	4.69096	0.01545	0.686935	0.0059323	0.832	22.202	0.005	0.042	NA	NA	ETV6-RUNX1_or_like
1:145227040-145248894	chr1	145227040	145248894	3.44496	0.028924	NA	NA	NOTCH2NL	ENSG00000264343	1.245	11.286	0.027	0.012	0.2316	0	0.1872	0	0	0.7653	6.46807	0.000445453	1.53074	0.000509071	0.162	16.477	0.002	0.015	+	hsa_circ_0002262	ETV6-RUNX1_or_like
2:114697535-114699936	chr2	114697535	114699936	2.9497	0.0300857	1.23452	0.000173766	ACTR3	ENSG00000115091	1.902	14.762	0.003	0.017	0.2316	0.5518	0.3744	0	0	0	6.28426	0.000647225	0.236311	0.52644	0.218	24.626	0	0.01	+	hsa_circ_0008712	ETV6-RUNX1_or_like
X:10031484-10066619	chrX	10031484	10066619	2.32432	0.0384926	1.73474	0.00428315	WWC3	ENSG00000047644	8.951	45.623	0.574	0.266	0.4632	2.4833	0	1.5049	6.1059	0.3826	3.35503	0.0357214	0.895145	0.102788	7.915	82.57	4.507	217.03	+	hsa_circ_0001910	ETV6-RUNX1_or_like
4:25848915-25849486	chr4	25848915	25849486	3.12845	0.0484561	2.74811	0.000131676	SEL1L3	ENSG00000091490	2.002	16.879	0.031	0.026	0	0	0.1872	0	0	0	7.43064	3.2582e-06	3.32375	0.000139089	0.21	42.973	0.002	0.026	NA	NA	ETV6-RUNX1_or_like
1:114372213-114377061	chr1	114372213	114377061	3.44033	4.58e-14	2.04471	0.00015893	PTPN22	ENSG00000134242	7.955	80.247	0.28	0.476	0.6948	0	0	0.6945	0	3.4438	2.86139	0.00474974	2.21614	5.99218e-05	12.727	93.775	0.212	0.473	-	hsa_circ_0000110	HHD
9:37126308-37126939	chr9	37126308	37126939	2.22795	8.86e-12	-0.815944	0.0673911	ZCCHC7	ENSG00000147905	22.49	98.271	0.035	0.23	5.0953	2.4833	35.0999	30.6759	18.7873	5.7396	3.08636	0.000591095	-0.462199	0.17182	54.447	461.26	0.016	0.601	+	hsa_circ_0001860	HHD
5:56160560-56161804	chr5	56160560	56161804	2.9812	3.62e-08	2.54113	9.2e-13	MAP3K1	ENSG00000095015	14.694	130.798	0.209	0.167	0.2316	0	6.552	7.5243	24.6583	1.9132	2.59176	2.74118e-05	2.49818	1.10461e-09	58.563	354.95	0.237	0.216	+	hsa_circ_0001485	HHD
5:122881110-122893258	chr5	122881110	122893258	2.26206	9.59e-08	1.82247	0.00301929	CSNK1G3	ENSG00000151292	90.743	443.915	1.758	1.188	7.4114	4.9666	13.0104	15.9746	14.3253	4.5917	2.50597	1.36883e-07	1.99338	9.62396e-14	173.643	985.345	1.209	2.333	+	hsa_circ_0001522	HHD
1:211526580-211527809	chr1	211526580	211527809	2.5979	1.09e-06	2.85938	2.18e-25	TRAF5	ENSG00000082512	9.425	55.809	0.256	0.119	1.158	1.1037	0	0.5788	0.9394	4.5917	3.28778	0.00438784	2.70975	6.78504e-16	6.773	65.224	0.04	0.064	+	hsa_circ_0007234	HHD
3:5215701-5216099	chr3	5215701	5216099	2.54789	1.71e-06	0.284065	0.580925	ARL8B	ENSG00000134108	20.773	117.393	0.123	0.728	0.6948	1.3796	0.2808	0.2315	0.2348	1.1479	2.48592	0.0372849	0.00608682	0.980437	21.076	117.402	0.098	0.313	+	hsa_circ_0001263	HHD
19:45528586-45528995	chr19	45528586	45528995	3.48419	8.1e-06	3.25025	5.33e-07	RELB	ENSG00000104856	3.211	35.062	0.233	0.207	0.9264	1.6555	0.468	0.9261	0.2348	2.6785	3.51024	0.0263362	3.66139	2.91544e-23	1.601	16.206	0.126	0.197	+	hsa_circ_0008590	HHD
X:100296305-100297301	chrX	100296305	100297301	2.47981	1.5e-05	-0.403111	0.127403	TRMT2B	ENSG00000188917	9.544	53.994	0.091	0.457	0	0	0.0936	0.2315	0.2348	0	3.4943	0.00409733	0.747654	0.000174851	7.444	81.842	0.034	0.308	-	hsa_circ_0001937	HHD
11:72695132-72700142	chr11	72695132	72700142	1.68594	1.71e-05	2.79467	3.09e-09	FCHSD2	ENSG00000137478	28.209	93.764	0.925	0.118	3.9373	2.4833	2.2464	0.5788	1.8787	4.2091	3.34746	0.000183265	1.1576	0.0644773	24.721	249.291	0.534	2.003	-	hsa_circ_0005918	HHD
12:70193988-70195501	chr12	70193988	70195501	2.26908	1.71e-05	1.84901	0.00143175	RAB3IP	ENSG00000127328	12.33	57.087	0.78	0.352	3.7057	4.4148	2.7144	1.3891	1.409	11.8619	2.84168	0.0132011	0.90425	0.0506905	7.359	51.492	0.136	0.465	+	hsa_circ_0000419	HHD
3:57276883-57282379	chr3	57276883	57282379	2.25857	5.46e-05	1.07467	0.00414233	APPL1	ENSG00000157500	11.796	54.986	0.085	0.122	1.158	0.8278	1.872	1.6206	2.5833	3.8264	2.48798	0.00554372	0.759965	0.000303772	24.928	138.846	0.053	0.184	+	hsa_circ_0001317	HHD
12:121220457-121222396	chr12	121220457	121222396	1.3359	7.51e-05	0.937196	0.0449876	SPPL3	ENSG00000157837	43.038	105.015	1.402	1.397	0.9264	6.3462	1.7784	1.5049	0.2348	3.0611	2.71449	0.000161565	1.19588	0.00120275	49.714	325.296	3.301	13.357	-	hsa_circ_0003472	HHD
1:15964801-15970145	chr1	15964801	15970145	2.29019	0.00012357	1.14736	0.0104201	DDI2	ENSG00000197312	8.913	43.888	0.13	0.264	1.6212	2.2074	1.0296	1.8521	0.9394	1.5306	2.02896	0.0361796	0.159847	0.581121	18.281	74.492	0.131	0.571	+	hsa_circ_0000019	HHD
22:26059596-26070495	chr22	26059596	26070495	2.33754	0.000133442	2.54198	9.24e-06	ADRBK2	ENSG00000100077	8.098	42.338	0.141	0.09	0.4632	0.5518	0.468	0.2315	0	4.2091	3.01562	0.00474974	1.81664	7.17981e-05	4.19	33.68	0.023	0.048	+	hsa_circ_0062649	HHD
7:18705835-18706099	chr7	18705835	18706099	2.87744	0.000140628	2.39233	5.21e-07	HDAC9	ENSG00000048052	2.621	22.116	0.104	0.082	1.158	1.6555	4.68	1.7364	5.6362	0	3.1048	0.00114921	1.90434	3.08081e-18	6.428	55.466	0.044	0.099	+	hsa_circ_0007904	HHD
1:111690263-111703918	chr1	111690263	111703918	2.82052	0.000151839	2.10217	4.21e-15	CEPT1	ENSG00000134255	3.879	33.996	0.107	0.088	0.9264	0.8278	2.6208	1.3891	0.7045	3.4438	2.17241	0.00697811	1.00565	1.10276e-09	18.364	83.466	0.133	0.324	+	hsa_circ_0000106	HHD
8:37971709-37976881	chr8	37971709	37976881	2.4553	0.000159242	-1.42957	0.000318862	ASH2L	ENSG00000129691	9.653	54.977	0.089	1.197	0.9264	1.6555	1.7784	1.6206	1.6439	3.8264	2.54642	0.00167063	0.010046	0.969489	18.249	106.591	0.085	0.788	+	hsa_circ_0001790	HHD
14:71867510-71884913	chr14	71867510	71884913	2.70963	0.000192496	2.85337	1.09e-06	SIPA1L1	ENSG00000197555	5.68	35.768	0.611	1.579	0	0.5518	0.1872	0	0	2.6785	6.12494	1.79469e-10	2.94252	3.12152e-16	1.303	85.271	0.089	5.437	+	hsa_circ_0002722	HHD
2:231222519-231226412	chr2	231222519	231226412	2.38544	0.000193352	2.63441	2.29e-12	SP140L	ENSG00000185404	8.287	39.854	0.187	0.089	0.2316	0	0.6552	0.2315	0.7045	0.3826	3.35686	0.00202532	1.66384	2.4657e-12	7.654	77.591	0.034	0.137	+	hsa_circ_0008382	HHD
3:56661064-56662642	chr3	56661064	56662642	1.66669	0.000193352	-0.195741	0.576204	FAM208A	ENSG00000163946	29.237	91.962	0.166	0.346	0.6948	1.1037	1.5912	2.0836	2.1136	3.0611	2.23621	0.000550605	0.296787	0.0889827	41.165	193.247	0.074	0.308	-	hsa_circ_0001314	HHD
17:40650941-40653322	chr17	40650941	40653322	3.8398	0.000194137	3.22631	1.14e-07	ATP6V0A1	ENSG00000033627	1.665	17.797	0.197	0.145	0	0	0	0	0	1.5306	4.9499	4.91365e-07	2.61394	5.22766e-07	1.601	52.125	0.213	0.695	+	hsa_circ_0043837	HHD
9:14639893-14662324	chr9	14639893	14662324	4.67409	0.000227282	4.40558	2.29e-07	ZDHHC21	ENSG00000175893	0.82	20.301	0.07	0.07	0	0	0.0936	0.2315	0	0.3826	6.2849	6.34306e-08	3.80984	1.14341e-05	0.356	38.558	0.015	0.142	NA	NA	HHD
3:71064699-71102924	chr3	71064699	71102924	3.67519	0.000496843	2.92203	9.46e-10	FOXP1	ENSG00000114861	1.526	23.646	0.021	0.024	0.2316	0	0.1872	0	0.7045	0	2.77177	0.00427814	2.14279	5.53186e-23	6.734	47.844	0.097	0.099	-	hsa_circ_0001320	HHD
15:44624185-44630515	chr15	44624185	44630515	1.7416	0.000497098	0.692505	0.0535832	CASC4	ENSG00000166734	15.49	53.43	0.123	0.139	1.158	0.8278	1.5912	1.8521	0.2348	0.7653	1.66274	0.000645523	0.715741	0.00385615	44.046	140.399	0.084	0.191	+	hsa_circ_0000596	HHD
10:52193235-52350007	chr10	52193235	52350007	2.61216	0.000568507	1.91091	1.53e-06	SGMS1	ENSG00000198964	5.642	34.106	0.211	0.259	0.2316	0	1.2168	1.2733	1.1742	0.3826	2.13988	0.0228895	1.45058	3.28937e-07	12.026	52.794	0.137	0.44	-	hsa_circ_0018401	HHD
2:190584297-190585513	chr2	190584297	190585513	4.16265	0.000588462	1.81892	2.6e-07	ANKAR	ENSG00000151687	1.77	20.994	0.25	0.82	0	0	0	0	0	0	4.19341	0.000157891	2.18827	1.29175e-29	2.319	41.086	0.179	1.043	NA	NA	HHD
21:37619814-37620866	chr21	37619814	37620866	1.32795	0.000745916	1.24886	0.0051148	DOPEY2	ENSG00000142197	58.098	147.572	2.01	0.922	3.9373	6.0703	1.9656	3.357	2.3484	0.3826	2.36656	0.00474974	1.4562	0.000338317	51.94	267.828	1.479	2.101	+	hsa_circ_0001187	HHD
12:28378727-28412375	chr12	28378727	28412375	1.34769	0.000865902	0.9039	0.0520145	CCDC91	ENSG00000123106	66.348	164.76	0.745	0.828	1.6212	4.4148	1.3104	2.0836	0	0.7653	3.77109	2.13646e-05	1.11569	2.40627e-07	38.218	519.068	0.115	1.657	+	hsa_circ_0000386	HHD
20:57014000-57016139	chr20	57014000	57016139	1.34774	0.00117517	-0.287303	0.603432	VAPB	ENSG00000124164	41.983	111.77	2.137	1.022	11.8118	8.8295	7.488	7.0612	7.9846	4.2091	2.01032	0.00103326	-0.0972431	0.837841	44.342	177.126	1.735	3.042	+	hsa_circ_0001173	HHD
4:42505466-42526864	chr4	42505466	42526864	3.12662	0.00117517	1.79878	1.92e-12	ATP8A1	ENSG00000124406	1.834	18.017	0.019	0.035	0.2316	2.2074	0.3744	0.5788	0.4697	1.5306	4.15371	0.000146924	1.31351	1.73919e-11	2.458	43.021	0.008	0.063	-	hsa_circ_0069612	HHD
5:137320945-137324004	chr5	137320945	137324004	1.1151	0.00123648	0.479704	0.137855	FAM13B	ENSG00000031003	139.559	300.834	1.187	1.211	20.1496	25.6608	9.6408	13.891	16.204	20.2801	2.00437	4.04919e-05	0.880805	1.20344e-06	169.058	676.924	0.812	2.055	-	hsa_circ_0001535	HHD
6:90916287-90981660	chr6	90916287	90981660	1.89558	0.00124394	1.9956	0.00349573	BACH2	ENSG00000112182	29.163	113.332	0.716	0.251	1.3896	8.2777	0.7488	0.1158	2.5833	0	2.25415	0.0280212	0.463325	0.520387	27.552	132.14	0.485	0.964	-	hsa_circ_0001626	HHD
3:149563797-149639014	chr3	149563797	149639014	1.67078	0.001511	0.90979	0.15946	RNF13	ENSG00000082996	38.086	125.744	0.336	0.466	3.2425	2.2074	2.808	3.5885	0.7045	6.5049	1.22482	0.00977048	1.02834	0.000209339	119.812	280.245	0.563	0.847	+	hsa_circ_0001346	HHD
12:40696590-40697936	chr12	40696590	40697936	5.57894	0.00180552	4.47473	8.53e-09	LRRK2	ENSG00000188906	0.975	45.172	0.076	0.164	0	0	0	0	0	0	6.56164	5.79169e-09	2.97758	0.00350453	1.024	74.547	0.016	0.178	+	hsa_circ_0025887	HHD
2:231120166-231152681	chr2	231120166	231152681	3.38829	0.00180552	3.63172	2.44e-07	SP140	ENSG00000079263	1.437	17.761	0.086	0.034	0	0	0	0	0	1.1479	5.15917	2.87622e-08	3.5349	5.51517e-11	1.212	48.838	0.015	0.042	NA	NA	HHD
9:14639893-14680160	chr9	14639893	14680160	3.65675	0.00294213	4.40558	2.29e-07	ZDHHC21	ENSG00000175893	7.681	90.298	0.394	0.347	0	0	0.7488	1.9679	0	4.2091	5.3599	0.00364326	3.80984	1.14341e-05	5.001	203.057	0.151	0.745	-	hsa_circ_0008952	HHD
15:44907560-44912601	chr15	44907560	44912601	2.11023	0.00298682	0.610549	0.0184136	SPG11	ENSG00000104133	6.848	32.193	0.12	0.146	0.6948	2.4833	0.8424	0.6945	0	1.1479	2.69017	0.00233848	1.1353	4.42909e-11	14.726	94.932	0.066	0.226	-	hsa_circ_0003784	HHD
10:11523768-11527910	chr10	11523768	11527910	2.41218	0.00326015	1.91965	4.88e-12	USP6NL	ENSG00000148429	5.525	29.93	0.106	0.058	0.6948	0	0.468	0.1158	0.7045	0.7653	3.68453	0.00474974	1.21671	6.40978e-13	4.411	54.903	0.019	0.092	-	hsa_circ_0017683	HHD
1:120572528-120594393	chr1	120572528	120594393	2.882	0.00358798	3.54739	7.43e-14	NOTCH2	ENSG00000134250	3.137	20.222	0.122	0.046	0.6948	0	0.2808	0.1158	0	0	4.54536	7.15259e-06	3.01682	8.69882e-20	2.611	31.657	0.105	0.069	-	hsa_circ_0002128	HHD
14:71880664-71996087	chr14	71880664	71996087	3.09274	0.00424933	2.85337	1.09e-06	SIPA1L1	ENSG00000197555	4.052	40.331	0.609	2.021	0.6948	0.2759	0.1872	1.3891	0.4697	5.7396	5.12083	5.96463e-08	2.94252	3.12152e-16	5.417	189.702	0.264	12.621	NA	NA	HHD
3:169854206-169867032	chr3	169854206	169867032	1.37127	0.00443399	1.7672	5.6e-05	PHC3	ENSG00000173889	24.263	59.966	0.364	0.17	3.2425	0.2759	7.956	5.0934	3.5226	7.2702	1.92555	0.000300991	0.869843	0.00555393	76.26	290.033	0.752	1.52	-	hsa_circ_0001359	HHD
20:30904020-30904677	chr20	30904020	30904677	2.1924	0.00448776	1.13338	1.05e-06	KIF3B	ENSG00000101350	6.785	25.423	0.312	0.415	1.158	0.8278	0.468	1.3891	0.2348	0.7653	3.46198	5.12711e-05	1.97608	1.68577e-14	9.365	102.097	0.266	0.902	+	hsa_circ_0002302	HHD
3:47139444-47147610	chr3	47139444	47147610	1.45783	0.00513721	1.20476	0.00033416	SETD2	ENSG00000181555	22.154	59.305	0.222	0.163	1.8528	0.8278	2.808	2.6624	2.3484	1.5306	2.28947	4.39689e-07	-0.217135	0.637633	32.239	156.697	0.249	1.324	-	hsa_circ_0001290	HHD
1:114391161-114397671	chr1	114391161	114397671	2.84016	0.00534901	2.04471	0.00015893	PTPN22	ENSG00000134242	2.911	21.25	0.106	0.131	0	0	0	0.1158	0	2.2959	3.82197	0.0077316	2.21614	5.99218e-05	2.569	37.342	0.055	0.189	-	hsa_circ_0000111	HHD
12:28408513-28412375	chr12	28408513	28412375	1.75459	0.00534901	0.9039	0.0520145	CCDC91	ENSG00000123106	24.887	78.215	0.209	0.35	1.158	1.1037	0.1872	1.0418	0	0.7653	4.13094	0.000278152	1.11569	2.40627e-07	9.352	162.443	0.028	0.525	+	hsa_circ_0000387	HHD
5:122881110-122888841	chr5	122881110	122888841	3.01121	0.00572909	1.82247	0.00301929	CSNK1G3	ENSG00000151292	1.623	17.872	0.034	0.046	0.2316	0	0.7488	0.6945	0.7045	0	3.47685	0.00014672	1.99338	9.62396e-14	3.409	38.712	0.028	0.095	NA	NA	HHD
11:128993340-128994789	chr11	128993340	128994789	4.44048	0.00575317	3.07646	0.0124174	ARHGAP32	ENSG00000134909	0.897	22.104	0.087	0.235	1.8528	0	0.7488	0.8103	0	0	3.59861	0.0326333	1.49688	0.0981403	1.556	19.364	0.068	0.381	-	hsa_circ_0000371	HHD
2:54278094-54284497	chr2	54278094	54284497	2.65322	0.00583725	1.55891	1.77e-08	ACYP2	ENSG00000170634	4.446	28.237	0.215	0.33	0.4632	0.2759	0	0.2315	0	0	2.99837	0.00702793	2.03275	6.50483e-12	3.514	28.607	0.223	0.323	+	hsa_circ_0004462	HHD
12:46622935-46648719	chr12	46622935	46648719	1.5796	0.00635372	0.0611215	0.895453	SLC38A1	ENSG00000111371	22.601	72.917	0.038	0.092	0.2316	0	0.3744	2.3152	0.7045	1.5306	1.96597	0.0192572	-0.00611396	0.981804	29.509	114.429	0.017	0.084	-	hsa_circ_0000397	HHD
3:30664690-30691952	chr3	30664690	30691952	3.05969	0.00682953	1.23206	0.0150923	TGFBR2	ENSG00000163513	1.624	14.01	0.011	0.024	0	0	0.468	0.1158	0	0	3.29985	0.0273312	1.71185	9.73388e-10	2.089	21.718	0.008	0.034	NA	NA	HHD
7:23015828-23030758	chr7	23015828	23030758	1.61349	0.00682953	0.836	0.0172053	FAM126A	ENSG00000122591	7.675	26.623	0.15	0.159	0.9264	0.5518	1.1232	2.0836	1.6439	3.4438	1.75595	0.00668039	0.950016	1.26315e-05	31.314	106.292	0.154	0.481	-	hsa_circ_0005251	HHD
1:59805629-59812070	chr1	59805629	59812070	2.21887	0.00984157	1.00965	0.00643728	FGGY	ENSG00000172456	4.718	20.42	0.264	0.462	2.0844	0	0.2808	0.5788	0	0.3826	3.07189	0.0171475	1.14489	1.81351e-05	4.139	34.21	0.15	2.842	+	hsa_circ_0000076	HHD
10:111883774-111890244	chr10	111883774	111890244	1.71702	0.0105272	1.3066	0.0109909	ADD3	ENSG00000148700	9.8	33.574	0.044	0.034	2.5477	0	0.7488	1.0418	0.2348	0	2.20202	0.0472731	1.24683	0.00254204	16.347	76.124	0.03	0.048	+	hsa_circ_0003357	HHD
15:59204761-59209198	chr15	59204761	59209198	0.940955	0.0110938	0.260637	0.234583	SLTM	ENSG00000137776	73.288	142.746	0.524	0.437	4.8637	16.2795	18.3455	14.7013	16.4389	16.071	1.23383	0.00925305	0.227178	0.39097	238.702	561.692	0.226	0.571	-	hsa_circ_0000605	HHD
7:87068982-87069718	chr7	87068982	87069718	2.90503	0.0136288	2.37339	0.0157599	ABCB4	ENSG00000005471	2.956	20.501	0.091	0.152	0	0	0.1872	0	0.2348	0	3.89948	0.000811778	2.46575	0.00356593	3.223	46.621	0.045	0.18	-	hsa_circ_0080960	HHD
19:17387303-17387718	chr19	17387303	17387718	1.52208	0.0146962	-0.48727	0.17179	BABAM1	ENSG00000105393	12.252	33.059	0.082	0.236	2.7793	4.6907	1.5912	1.7364	0.9394	2.2959	2.15251	0.0137187	0.927927	0.0373461	13.45	60.006	0.023	0.152	+	hsa_circ_0003253	HHD
6:90916287-90962309	chr6	90916287	90962309	2.21879	0.016632	1.9956	0.00349573	BACH2	ENSG00000112182	4.564	22.485	0.098	0.052	0.6948	0.8278	0.0936	0	0	0	5.52686	9.90132e-08	0.463325	0.520387	0.748	32.317	0.014	0.226	NA	NA	HHD
12:94562928-94580249	chr12	94562928	94580249	1.91053	0.0188291	0.886621	0.0374566	PLXNC1	ENSG00000136040	9.058	39.317	0.316	0.26	0.4632	0.5518	3.276	0.5788	1.1742	1.9132	2.7111	0.000368251	1.1444	0.00867846	24.618	161.282	0.207	0.652	NA	NA	HHD
4:103644027-103647840	chr4	103644027	103647840	1.54187	0.0188291	0.677504	0.0683754	MANBA	ENSG00000109323	11.346	30.004	0.094	0.169	1.3896	0.5518	0.936	5.0934	0	0.3826	2.48892	0.0252437	-0.0332405	0.908103	12.03	67.686	0.035	0.259	-	hsa_circ_0006007	HHD
1:59805629-59844509	chr1	59805629	59844509	1.66911	0.0193899	1.00965	0.00643728	FGGY	ENSG00000172456	11.292	35.272	0.873	0.813	0	0	1.6848	1.2733	0	2.2959	1.9085	0.0110508	1.14489	1.81351e-05	26.956	99.109	0.877	8.035	+	hsa_circ_0006633	HHD
19:21587930-21588658	chr19	21587930	21588658	2.21106	0.0197097	0.544182	0.30951	ZNF493	ENSG00000196268	3.436	15.679	1.891	29.714	0.4632	1.1037	0.468	0.3473	0.2348	0.3826	3.38769	0.00476793	-0.27888	0.130725	3.735	36.894	0.054	117.398	NA	NA	HHD
8:37734626-37735069	chr8	37734626	37735069	1.43798	0.0231757	2.97854	2.82e-08	RAB11FIP1	ENSG00000156675	18.382	50.434	0.549	0.174	0.4632	0	1.2168	1.5049	0.2348	2.2959	1.74364	0.00523037	1.4829	2.8465e-06	40.925	137.03	0.442	0.716	-	hsa_circ_0001789	HHD
3:31917924-31921322	chr3	31917924	31921322	4.19673	0.0236068	4.5787	2.35e-10	OSBPL10	ENSG00000144645	0.881	22.54	9.502	0.073	0	0	0	0	0	0	5.57572	3.1094e-06	4.35965	1.8693e-13	1.031	54.696	0.032	0.105	-	hsa_circ_0008549	HHD
1:24840803-24841057	chr1	24840803	24841057	1.54633	0.0239386	0.956901	0.134702	RCAN3	ENSG00000117602	15.079	41.897	0.808	0.474	1.3896	0.2759	0.6552	1.0418	0	0	2.18464	6.51412e-06	0.516908	0.230808	32.63	148.358	1.816	3.119	+	hsa_circ_0003553	HHD
4:103610730-103612114	chr4	103610730	103612114	1.79345	0.0270801	0.677504	0.0683754	MANBA	ENSG00000109323	4.33	17.392	0.056	0.1	0.6948	0.2759	0.468	0	0	0.3826	3.43986	0.0080353	-0.0332405	0.908103	3.558	38.503	0.012	0.144	-	hsa_circ_0001429	HHD
7:23650789-23651172	chr7	23650789	23651172	1.13475	0.0301501	-0.337418	0.614841	CCDC126	ENSG00000169193	43.557	100.29	2.581	5.567	3.0109	1.6555	0.2808	1.3891	2.8181	5.7396	3.04105	0.000366047	0.596391	0.10581	32.518	267.375	1.048	4.782	+	hsa_circ_0001684	HHD
17:61841375-61842207	chr17	61841375	61842207	2.04735	0.0312391	0.309878	0.394755	CCDC47	ENSG00000108588	3.95	15.978	0.025	0.152	0.6948	0.2759	0.1872	0	0.4697	0.3826	2.85393	0.0300222	-0.820579	0.000123011	2.156	15.601	0.004	0.064	-	hsa_circ_0009168	HHD
22:40825609-40831558	chr22	40825609	40831558	2.12608	0.0342619	0.718682	0.0425566	MKL1	ENSG00000196588	2.88	12.943	0.153	0.174	0.2316	1.1037	0.7488	0.9261	2.3484	0	4.19243	0.00297157	0.119319	0.840859	1.287	21.694	0.04	0.289	-	hsa_circ_0063452	HHD
1:114377531-114397671	chr1	114377531	114397671	2.39623	0.0358524	2.04471	0.00015893	PTPN22	ENSG00000134242	3.371	19.1	0.126	0.117	0	0	0	0.463	0.2348	6.8876	3.43871	0.00608071	2.21614	5.99218e-05	5.883	65.356	0.096	0.336	NA	NA	HHD
3:67546221-67559327	chr3	67546221	67559327	2.3426	0.0358524	1.72684	0.0215011	SUCLG2	ENSG00000172340	3.137	18.017	0.05	0.068	2.7793	0	3.0888	2.4309	0.4697	4.2091	2.96322	0.0273312	3.27927	7.68538e-08	8.677	52.773	0.107	0.089	-	hsa_circ_0004276	HHD
7:72361165-72361649	chr7	72361165	72361649	1.37362	0.0358524	NA	NA	POM121	ENSG00000262122	9.963	24.509	0.381	0.191	2.0844	2.4833	1.872	1.5049	0.7045	0.3826	2.5634	0.0128351	0.319405	0.509106	9.273	53.89	0.317	3.019	+	hsa_circ_0003261	HHD
8:48308935-48320523	chr8	48308935	48320523	1.5212	0.0358639	0.476495	0.212205	SPIDR	ENSG00000164808	11.687	36.952	0.345	0.183	0.4632	1.9315	3.0888	1.6206	2.1136	0.7653	1.9504	0.00709676	NA	NA	32.45	125.86	0.162	0.517	+	hsa_circ_0001798	HHD
9:125932180-125936121	chr9	125932180	125936121	2.30575	0.0375831	1.41002	2.32e-08	STRBP	ENSG00000165209	3.572	19.435	0.015	0.023	1.158	0.8278	0.2808	0.8103	0.4697	0.3826	3.08972	0.0324726	1.0948	4.45443e-06	5.289	43.47	0.007	0.034	-	hsa_circ_0088425	HHD
20:2944917-2945848	chr20	2944917	2945848	1.26712	0.0383632	0.39265	0.129849	PTPRA	ENSG00000132670	14.911	39.047	0.181	0.239	0.6948	2.4833	4.8672	3.1255	4.9317	3.4438	2.04133	0.000550605	0.54074	0.0508188	39.355	161.424	0.207	0.814	+	hsa_circ_0006117	HHD
3:197592293-197602646	chr3	197592293	197602646	1.6028	0.0401402	0.694783	0.0630096	LRCH3	ENSG00000186001	7.11	21.581	0.116	0.178	0.6948	1.6555	0.936	2.0836	1.6439	8.0355	2.6284	0.000550605	0.664765	0.00309592	15.908	98.032	0.108	0.522	+	hsa_circ_0008351	HHD
5:102432244-102433485	chr5	102432244	102433485	1.53438	0.0411141	-1.46146	0.000270543	GIN1	ENSG00000145723	8.648	27.434	0.311	1.092	0	0.5518	0.468	0.463	1.1742	1.1479	3.00312	0.00880077	0.248127	0.463034	12.983	103.713	0.242	4.351	-	hsa_circ_0006499	HHD
2:128093445-128100770	chr2	128093445	128100770	2.38617	0.0461719	1.68767	3.94e-12	MAP3K2	ENSG00000169967	2.488	15.576	0.02	0.024	0	0	0.0936	0	0.4697	0	3.60698	0.0185754	0.807158	5.95591e-05	1.84	22.202	0.006	0.042	NA	NA	HHD
2:99786012-99787892	chr2	99786012	99787892	1.28684	0.0468328	0.236246	0.554375	MITD1	ENSG00000158411	20.3	47.538	0.335	0.325	3.0109	5.5185	2.5272	4.3988	3.7575	6.1223	1.21406	0.0101181	0.0948785	0.753165	38.931	90.649	0.122	0.364	-	hsa_circ_0001050	HHD
12:40696590-40697936	chr12	40696590	40697936	7.19974	1.42e-07	5.66148	1.64e-14	LRRK2	ENSG00000188906	0.295	45.172	0.021	0.164	0	0	0	0	0	0	6.30288	0.000263382	3.99717	1.98834e-32	1.604	74.547	0.031	0.178	+	hsa_circ_0025887	MLL
4:144464661-144465125	chr4	144464661	144465125	1.56081	3.06e-07	0.368644	0.260635	SMARCA5	ENSG00000153147	358.353	1059.87	0.759	2.177	69.0182	59.5994	30.7943	43.4093	34.2868	27.5503	1.87936	1.57712e-05	0.486387	0.194436	627.059	2291.88	0.373	3.468	+	hsa_circ_0001445	MLL
1:114372213-114377061	chr1	114372213	114377061	2.96546	2.68e-06	1.9588	0.000403908	PTPN22	ENSG00000134242	9.447	80.247	0.237	0.476	0.6948	0	0	0.6945	0	3.4438	3.2054	0.00163182	1.44421	5.26149e-05	12.835	93.775	0.028	0.473	-	hsa_circ_0000110	MLL
7:24663284-24708279	chr7	24663284	24708279	7.09826	4.17e-06	5.97739	3.31e-38	MPP6	ENSG00000105926	0	25.686	0	0.152	6.2533	11.8647	0	3.0097	27.4764	16.4537	8.43749	3.12491e-06	6.05423	2.13264e-19	0	123.859	0	0.517	+	hsa_circ_0001686	MLL
21:34804483-34805178	chr21	34804483	34805178	2.94201	4.42e-06	2.04134	7.5e-07	IFNGR2	ENSG00000159128	11.167	81.416	0.059	0.121	5.5585	0	0.7488	0.463	0.2348	1.9132	2.76437	0.0094398	2.91878	3.44728e-17	14.439	80.52	0.04	0.084	+	hsa_circ_0001185	MLL
5:56160560-56161804	chr5	56160560	56161804	2.09478	1.32e-05	1.97869	5.49e-06	MAP3K1	ENSG00000095015	29.491	130.798	0.174	0.167	0.2316	0	6.552	7.5243	24.6583	1.9132	2.47562	9.42116e-08	2.71604	2.56977e-19	64.637	354.95	0.135	0.216	+	hsa_circ_0001485	MLL
3:31917924-31921322	chr3	31917924	31921322	6.92697	1.42e-05	8.89407	7.3e-67	OSBPL10	ENSG00000144645	0	22.54	0	0.073	0	0	0	0	0	0	7.2543	0.000213476	7.70735	6.437e-28	0	54.696	0	0.105	-	hsa_circ_0008549	MLL
3:133907680-133914026	chr3	133907680	133914026	6.09343	1.9e-05	5.75307	3.93e-32	RYK	ENSG00000163785	0.197	29.551	0.053	0.185	1.6212	1.3796	0.0936	0.3473	0	2.6785	4.33566	0.000424936	4.00509	7.23841e-17	4.813	62.569	0.091	0.263	-	hsa_circ_0005768	MLL
7:24663284-24690331	chr7	24663284	24690331	6.31229	2.39e-05	5.97739	3.31e-38	MPP6	ENSG00000105926	0.193	24.914	0.044	0.142	5.5585	7.7258	0	0.9261	11.5072	7.2702	5.85993	1.03114e-05	6.05423	2.13264e-19	3.209	108.711	0.112	0.456	+	hsa_circ_0001685	MLL
12:28408513-28412375	chr12	28408513	28412375	2.76561	3.32e-05	1.09971	6.51e-05	CCDC91	ENSG00000123106	10.131	78.215	0.093	0.35	1.158	1.1037	0.1872	1.0418	0	0.7653	5.8049	7.88982e-08	1.63979	7.84787e-10	4.813	162.443	0.009	0.525	+	hsa_circ_0000387	MLL
12:28378727-28412375	chr12	28378727	28412375	1.71658	8.74e-05	1.09971	6.51e-05	CCDC91	ENSG00000123106	51.653	164.76	0.352	0.828	1.6212	4.4148	1.3104	2.0836	0	0.7653	3.45427	7.53084e-13	1.63979	7.84787e-10	50.553	519.068	0.1	1.657	+	hsa_circ_0000386	MLL
12:31595708-31600703	chr12	31595708	31600703	6.5826	8.74e-05	6.81869	1.25e-22	DENND5B	ENSG00000170456	0	17.648	0	0.08	0	0.2759	0.0936	0.463	0.7045	1.1479	6.9671	0.000481793	6.28905	9.01598e-42	0	44.757	0	0.153	-	hsa_circ_0008445	MLL
2:231120166-231152681	chr2	231120166	231152681	6.57093	8.74e-05	6.47186	4.2e-29	SP140	ENSG00000079263	0	17.761	0	0.034	0	0	0	0	0	1.1479	7.09831	0.00035496	5.70142	6.12226e-21	0	48.838	0	0.042	NA	NA	MLL
8:37734626-37735069	chr8	37734626	37735069	2.64625	0.000129131	3.35515	1.64e-12	RAB11FIP1	ENSG00000156675	8.405	50.434	0.225	0.174	0.4632	0	1.2168	1.5049	0.2348	2.2959	1.47705	0.0188339	1.58471	7.17284e-08	47.575	137.03	0.27	0.716	-	hsa_circ_0001789	MLL
11:128993340-128994789	chr11	128993340	128994789	6.10308	0.000157938	7.93327	1.45e-55	ARHGAP32	ENSG00000134909	0.295	22.104	0.25	0.235	1.8528	0	0.7488	0.8103	0	0	5.75784	0.0123323	4.92824	4.37732e-08	0	19.364	0	0.381	-	hsa_circ_0000371	MLL
10:31661946-31750166	chr10	31661946	31750166	5.97523	0.00016324	6.83886	5.05e-32	ZEB1	ENSG00000148516	0.193	19.376	0.049	12.807	0.2316	0.5518	0	0.1158	1.8787	3.8264	6.38677	0.00247577	4.31371	7.6286e-10	0	29.961	0	3.481	+	hsa_circ_0000230	MLL
21:34793786-34805178	chr21	34793786	34805178	3.84875	0.000216191	2.04134	7.5e-07	IFNGR2	ENSG00000159128	1.761	28.756	0.011	0.04	0.4632	0	0.2808	0.6945	0	0.7653	3.83816	0.00377322	NA	NA	4.813	45.687	0.015	0.051	+	hsa_circ_0002113	MLL
X:100296305-100297301	chrX	100296305	100297301	2.73968	0.000216191	-0.797627	0.182446	TRMT2B	ENSG00000188917	8.186	53.994	0.036	0.457	0	0	0.0936	0.2315	0.2348	0	2.98896	0.00496474	0.950126	0.0235789	12.835	81.842	0.024	0.308	-	hsa_circ_0001937	MLL
12:46622935-46637097	chr12	46622935	46637097	1.80987	0.000298296	1.40199	0.000626223	SLC38A1	ENSG00000111371	28.581	98.839	0.078	0.126	2.316	2.4833	5.0544	5.2091	6.3407	4.9744	2.35191	0.000134116	1.49075	9.40306e-07	51.259	243.379	0.035	0.181	-	hsa_circ_0000396	MLL
17:47388673-47389404	chr17	47388673	47389404	2.26024	0.000449881	2.52594	3.69e-06	ZNF652	ENSG00000198740	19.1	81.073	0.996	0.938	2.316	2.2074	2.1528	1.2733	0.7045	2.6785	1.92201	0.00419473	0.720222	0.197832	27.349	102.47	0.548	7.967	-	hsa_circ_0003258	MLL
17:40650941-40653322	chr17	40650941	40653322	5.82242	0.000464504	4.11766	2.6e-07	ATP6V0A1	ENSG00000033627	0.734	17.797	0.045	0.145	0	0	0	0	0	1.5306	7.19068	0.000222457	3.08875	1.23942e-08	0	52.125	0	0.695	+	hsa_circ_0043837	MLL
1:14057494-14068652	chr1	14057494	14068652	3.43672	0.000503325	3.23376	3.74e-05	PRDM2	ENSG00000116731	2.794	32.154	0.252	0.098	1.3896	1.3796	1.0296	0.3473	2.8181	2.6785	4.62816	0.000141529	-0.108689	0.922648	3.796	69.193	0.03	0.775	+	hsa_circ_0005986	MLL
2:231134246-231152681	chr2	231134246	231152681	6.17534	0.000763212	6.47186	4.2e-29	SP140	ENSG00000079263	0	13.699	0	0.025	0	0	0	0	0	0.7653	5.68888	0.0117588	5.70142	6.12226e-21	0	18.405	0	0.016	NA	NA	MLL
10:11523768-11527910	chr10	11523768	11527910	3.54649	0.000906609	2.85554	9.93e-11	USP6NL	ENSG00000148429	2.77	29.93	0.031	0.058	0.6948	0	0.468	0.1158	0.7045	0.7653	2.53893	0.0114962	2.31585	2.3245e-12	7.628	54.903	0.049	0.092	-	hsa_circ_0017683	MLL
2:207144263-207162097	chr2	207144263	207162097	5.74908	0.000906609	7.76445	2.83e-24	ZDBF2	ENSG00000204186	0.295	17.47	0.412	0.197	0	0	0	2.3152	0	1.5306	7.36542	0.000138848	4.00514	2.33144e-06	0	58.919	0	0.748	+	hsa_circ_0002141	MLL
3:56661064-56662642	chr3	56661064	56662642	1.96441	0.00091818	-0.266683	0.427662	FAM208A	ENSG00000163946	22.375	91.962	0.081	0.346	0.6948	1.1037	1.5912	2.0836	2.1136	3.0611	2.30351	2.26027e-05	0.610122	0.0758647	40.496	193.247	0.041	0.308	-	hsa_circ_0001314	MLL
6:144858717-144860579	chr6	144858717	144860579	2.13636	0.00091818	2.24713	1.15e-12	UTRN	ENSG00000152818	15.238	69.605	0.086	0.065	1.8528	3.0352	0.6552	1.0418	0.2348	0.7653	3.46351	0.000204855	1.36642	0.0504997	14.439	126.313	0.006	0.119	+	hsa_circ_0001647	MLL
21:37619814-37620866	chr21	37619814	37620866	1.64048	0.000926834	1.33806	0.0533805	DOPEY2	ENSG00000142197	46.235	147.572	1.711	0.922	3.9373	6.0703	1.9656	3.357	2.3484	0.3826	2.20317	3.41242e-05	1.47342	0.0109146	61.078	267.828	0.845	2.101	+	hsa_circ_0001187	MLL
14:71880664-71996087	chr14	71880664	71996087	2.747	0.000946068	3.11191	3.1e-17	SIPA1L1	ENSG00000197555	6.134	40.331	0.311	2.021	0.6948	0.2759	0.1872	1.3891	0.4697	5.7396	7.66981	1.53263e-06	1.51991	0.0350595	1.604	189.702	0.007	12.621	NA	NA	MLL
2:231222519-231226412	chr2	231222519	231226412	2.60533	0.00105469	2.64069	1.2e-10	SP140L	ENSG00000185404	6.634	39.854	0.087	0.089	0.2316	0	0.6552	0.2315	0.7045	0.3826	7.76594	3.53662e-05	2.35557	5.39045e-10	0	77.591	0	0.137	+	hsa_circ_0008382	MLL
2:86088303-86090608	chr2	86088303	86090608	3.58566	0.00105469	2.14339	2.13e-05	ST3GAL5	ENSG00000115525	2.098	24.493	0.134	0.289	1.3896	0	0	0	0	0	6.47861	0.00176308	2.31299	7.43708e-05	0	31.949	0	0.158	-	hsa_circ_0055451	MLL
7:87068982-87069718	chr7	87068982	87069718	4.37141	0.00110034	2.85591	4.05e-05	ABCB4	ENSG00000005471	0.774	20.501	0.032	0.152	0	0	0.1872	0	0.2348	0	5.61158	0.00227546	3.84137	3.6076e-18	1.604	46.621	0.041	0.18	-	hsa_circ_0080960	MLL
8:103372298-103373854	chr8	103372298	103373854	1.97128	0.001296	1.31692	0.000303815	UBR5	ENSG00000104517	19.044	78.86	0.123	0.209	6.2533	2.4833	6.9264	5.4406	9.3936	10.3314	1.51984	0.039936	0.308966	0.403249	43.668	116.96	0.057	0.353	-	hsa_circ_0001819	MLL
8:37971709-37976881	chr8	37971709	37976881	2.38097	0.00164878	-1.34944	9.19e-05	ASH2L	ENSG00000129691	10.602	54.977	0.058	1.197	0.9264	1.6555	1.7784	1.6206	1.6439	3.8264	2.91149	0.000156087	-0.00419265	0.992928	16.356	106.591	0.037	0.788	+	hsa_circ_0001790	MLL
11:108098321-108100050	chr11	108098321	108100050	2.56418	0.00203667	1.45271	0.000151555	ATM	ENSG00000149311	7.663	46.251	0.046	0.072	0.9264	0.8278	0.6552	0.5788	0.7045	1.1479	3.96954	6.50549e-06	2.0426	8.97718e-12	12.835	152.042	0.013	0.134	+	hsa_circ_0024193	MLL
2:114697535-114699936	chr2	114697535	114699936	5.02124	0.00372458	0.830347	0.020189	ACTR3	ENSG00000115091	0.291	14.762	0	0.017	0.2316	0.5518	0.3744	0	0	0	6.10277	0.00500297	0.671989	0.0585875	0	24.626	0	0.01	+	hsa_circ_0008712	MLL
1:15964801-15970145	chr1	15964801	15970145	2.40813	0.00422957	1.47492	0.000142352	DDI2	ENSG00000197312	8.631	43.888	0.11	0.264	1.6212	2.2074	1.0296	1.8521	0.9394	1.5306	3.10528	0.0031926	0.635877	0.0917228	11.231	74.492	0.033	0.571	+	hsa_circ_0000019	MLL
2:190584297-190585513	chr2	190584297	190585513	3.46578	0.00479995	1.48633	0.0040808	ANKAR	ENSG00000151687	1.651	20.994	0.254	0.82	0	0	0	0	0	0	4.29258	0.00749667	2.09109	8.88422e-12	3.209	41.086	0.129	1.043	NA	NA	MLL
15:44624185-44630515	chr15	44624185	44630515	1.89423	0.00597375	0.194233	0.702575	CASC4	ENSG00000166734	13.475	53.43	0.048	0.139	1.158	0.8278	1.5912	1.8521	0.2348	0.7653	1.54504	0.00967285	0.839103	0.0188061	47.263	140.399	0.044	0.191	+	hsa_circ_0000596	MLL
1:120572528-120594393	chr1	120572528	120594393	3.69671	0.00729459	4.32758	1.43e-08	NOTCH2	ENSG00000134250	2.012	20.222	0.025	0.046	0.6948	0	0.2808	0.1158	0	0	5.04456	0.00784724	2.28402	0.000317929	1.604	31.657	0.004	0.069	-	hsa_circ_0002128	MLL
5:137320945-137324004	chr5	137320945	137324004	1.12256	0.00731203	0.49147	0.217066	FAM13B	ENSG00000031003	135.994	300.834	1.085	1.211	20.1496	25.6608	9.6408	13.891	16.204	20.2801	1.88071	3.53662e-05	0.821677	0.025739	184.284	676.924	0.436	2.055	-	hsa_circ_0001535	MLL
9:14639893-14662324	chr9	14639893	14662324	3.40075	0.00731203	1.92902	5.92e-05	ZDHHC21	ENSG00000175893	2	20.301	0.036	0.07	0	0	0.0936	0.2315	0	0.3826	3.54385	0.0113904	1.84233	3.13267e-08	4.813	38.558	0.018	0.142	NA	NA	MLL
1:211526580-211527809	chr1	211526580	211527809	2.36997	0.00823378	2.68097	0.000489382	TRAF5	ENSG00000082512	12.683	55.809	0.271	0.119	1.158	1.1037	0	0.5788	0.9394	4.5917	6.11321	0.000400224	3.93146	4.06221e-08	1.604	65.224	0.007	0.064	+	hsa_circ_0007234	MLL
2:54278094-54284497	chr2	54278094	54284497	3.22149	0.00832586	1.07347	0.000615359	ACYP2	ENSG00000170634	3.376	28.237	0.048	0.33	0.4632	0.2759	0	0.2315	0	0	4.88982	0.0117368	1.31834	1.22906e-05	1.604	28.607	0.048	0.323	+	hsa_circ_0004462	MLL
14:71867510-71884913	chr14	71867510	71884913	2.54853	0.00989368	3.11191	3.1e-17	SIPA1L1	ENSG00000197555	7.428	35.768	0.277	1.579	0	0.5518	0.1872	0	0	2.6785	4.80209	4.98231e-05	1.51991	0.0350595	4.813	85.271	0.017	5.437	+	hsa_circ_0002722	MLL
1:114391161-114397671	chr1	114391161	114397671	2.92877	0.0103408	1.9588	0.000403908	PTPN22	ENSG00000134242	3.328	21.25	0.073	0.131	0	0	0	0.1158	0	2.2959	2.82802	0.0207362	1.44421	5.26149e-05	4.108	37.342	0.027	0.189	-	hsa_circ_0000111	MLL
19:1032390-1032695	chr19	1032390	1032695	3.10338	0.0103408	4.24444	1.47e-11	CNN2	ENSG00000064666	2.483	21.635	0.083	0.024	0.9264	0	0	0.6945	0.2348	3.8264	5.58352	0.0146549	0.607043	0.409792	0	17.151	0	0.118	+	hsa_circ_0004891	MLL
3:169694733-169706147	chr3	169694733	169706147	2.34269	0.0111218	0.802412	0.0352241	SEC62	ENSG00000008952	5.723	32.118	0.088	1.737	1.158	0.2759	1.2168	0.2315	0.4697	0.3826	2.36802	0.00357426	0.753299	0.0295235	13.615	75.106	0.01	0.069	+	hsa_circ_0001358	MLL
12:90049455-90049884	chr12	90049455	90049884	3.62014	0.0113539	3.99089	1.08e-22	ATP2B1	ENSG00000070961	1.274	15.994	0.021	0.017	0.2316	1.1037	0.468	0.5788	0.4697	1.9132	2.89346	0.0485376	1.92088	6.93117e-10	2.934	27.918	0.008	0.037	-	hsa_circ_0007621	MLL
20:57014000-57016139	chr20	57014000	57016139	1.35584	0.0130184	0.848135	0.00913094	VAPB	ENSG00000124164	43.967	111.77	3.658	1.022	11.8118	8.8295	7.488	7.0612	7.9846	4.2091	1.51631	0.0133685	0.559149	0.132543	64.443	177.126	1.077	3.042	+	hsa_circ_0001173	MLL
3:47139444-47147610	chr3	47139444	47147610	1.68857	0.0130184	1.58872	0.00856019	SETD2	ENSG00000181555	18.382	59.305	0.207	0.163	1.8528	0.8278	2.808	2.6624	2.3484	1.5306	3.00177	9.25289e-06	-0.577441	0.301393	22.343	156.697	0.031	1.324	-	hsa_circ_0001290	MLL
16:27357787-27364017	chr16	27357787	27364017	4.6557	0.0145688	3.41344	3.76e-14	IL4R	ENSG00000077238	0.927	12.57	0.014	0.022	0	0	0	0	0	0	6.98242	0.000539287	3.87089	9.17871e-18	0	45.143	0	0.033	+	hsa_circ_0038724	MLL
8:56863017-56866543	chr8	56863017	56866543	4.59429	0.015065	3.93777	7.12e-14	LYN	ENSG00000254087	1.029	13.848	0.003	0.006	0	0	0.6552	0.5788	0.2348	0.7653	6.13407	0.00394634	2.28942	1.52553e-09	0	25.084	0	0.034	+	hsa_circ_0006022	MLL
1:111690263-111703918	chr1	111690263	111703918	2.13394	0.0154639	1.81911	1.78e-09	CEPT1	ENSG00000134255	7.835	33.996	0.04	0.088	0.9264	0.8278	2.6208	1.3891	0.7045	3.4438	3.89392	0.000177369	1.05441	0.00408006	8.022	83.466	0.021	0.324	+	hsa_circ_0000106	MLL
4:25848915-25849486	chr4	25848915	25849486	3.25442	0.0171916	2.64454	1.82e-06	SEL1L3	ENSG00000091490	1.561	16.879	0.016	0.026	0	0	0.1872	0	0	0	2.11746	0.0407558	3.08582	7.25284e-10	8.646	42.973	0.039	0.026	NA	NA	MLL
11:72695132-72700142	chr11	72695132	72700142	1.30257	0.023573	2.77165	0.000917691	FCHSD2	ENSG00000137478	39.214	93.764	1.274	0.118	3.9373	2.4833	2.2464	0.5788	1.8787	4.2091	2.98735	2.38972e-07	0.990933	0.137487	34.472	249.291	0.223	2.003	-	hsa_circ_0005918	MLL
9:110062421-110074018	chr9	110062421	110074018	3.20506	0.023573	0.635135	0.114767	RAD23B	ENSG00000119318	1.454	16.62	0.003	0.026	1.3896	2.7592	1.0296	1.1576	1.6439	0	2.93209	0.0296969	0.706882	0.190294	6.418	35.972	0.006	0.034	+	hsa_circ_0008812	MLL
12:121220457-121222396	chr12	121220457	121222396	1.24772	0.0242658	1.73567	0.000347729	SPPL3	ENSG00000157837	43.676	105.015	1.999	1.397	0.9264	6.3462	1.7784	1.5049	0.2348	3.0611	2.59638	1.76425e-05	0.320896	0.662253	57.676	325.296	0.77	13.357	-	hsa_circ_0003472	MLL
20:30904020-30904677	chr20	30904020	30904677	2.18449	0.0284253	0.770776	0.0262489	KIF3B	ENSG00000101350	6.004	25.423	0.185	0.415	1.158	0.8278	0.468	1.3891	0.2348	0.7653	2.84544	0.000343428	1.75785	7.02626e-08	12.167	102.097	0.187	0.902	+	hsa_circ_0002302	MLL
10:111883774-111890244	chr10	111883774	111890244	1.86159	0.0300163	0.843623	0.0655574	ADD3	ENSG00000148700	9.322	33.574	0.018	0.034	2.5477	0	0.7488	1.0418	0.2348	0	2.18504	0.0493205	1.53736	6.31132e-06	19.253	76.124	0.014	0.048	+	hsa_circ_0003357	MLL
6:117010482-117013555	chr6	117010482	117013555	1.2921	0.0304746	1.09646	0.00557446	KPNA5	ENSG00000196911	33.13	82.222	0.335	0.654	4.1689	3.3111	2.6208	3.9358	5.1665	7.6529	2.99568	2.26027e-05	1.91286	1.17604e-13	41.008	296.714	0.116	1.051	NA	NA	MLL
5:122881110-122893258	chr5	122881110	122893258	1.96136	0.0311381	2.14958	0.00195558	CSNK1G3	ENSG00000151292	113.6	443.915	1.051	1.188	7.4114	4.9666	13.0104	15.9746	14.3253	4.5917	2.52604	2.506e-06	2.75999	5.85015e-14	175.258	985.345	1.056	2.333	+	hsa_circ_0001522	MLL
1:8601272-8617582	chr1	8601272	8617582	2.06428	0.0313659	2.5287	0.000778701	RERE	ENSG00000142599	7.96	34.984	0.474	0.226	6.0217	8.8295	2.0592	1.0418	1.6439	2.2959	3.94793	0.000160858	0.910879	0.0562745	5.987	73.699	0.057	1.016	-	hsa_circ_0002158	MLL
3:30664690-30691952	chr3	30664690	30691952	3.49533	0.0330457	1.24056	0.00248561	TGFBR2	ENSG00000163513	1.061	14.01	0.005	0.024	0	0	0.468	0.1158	0	0	5.92225	0.00662819	1.0637	0.000532712	0	21.718	0	0.034	NA	NA	MLL
17:45479497-45492285	chr17	45479497	45492285	1.43723	0.0337393	0.263571	0.628518	EFCAB13	ENSG00000178852	24.562	68.973	0.379	0.52	2.7793	1.6555	2.1528	0.5788	0.9394	3.4438	2.26645	4.01421e-06	1.6994	7.79028e-06	65.81	313.525	0.614	2.362	+	hsa_circ_0000778	MLL
6:47575662-47580272	chr6	47575662	47580272	3.90685	0.0348231	3.83562	6.35e-06	CD2AP	ENSG00000198087	0.77	13.66	0.007	0.044	1.3896	1.3796	0.6552	0.6945	0.7045	0	5.9384	0.00613065	3.25984	2.12488e-30	0	21.942	0	0.042	NA	NA	MLL
7:23650789-23651172	chr7	23650789	23651172	1.70238	0.0357857	0.640252	0.521447	CCDC126	ENSG00000169193	31.304	100.29	1.528	5.567	3.0109	1.6555	0.2808	1.3891	2.8181	5.7396	5.12911	2.4393e-13	2.28939	1.0495e-05	7.316	267.375	0.431	4.782	+	hsa_circ_0001684	MLL
21:46548316-46554747	chr21	46548316	46554747	2.70744	0.0380531	4.65082	1.89e-09	ADARB1	ENSG00000197381	3.188	23.717	1.562	0.166	0.9264	5.5185	25.6463	4.2831	20.666	1.1479	6.99442	0.000430776	3.37146	4.78114e-19	0	45.531	0	1.358	+	hsa_circ_0005037	MLL
9:14639893-14680160	chr9	14639893	14680160	1.36337	0.0394139	1.92902	5.92e-05	ZDHHC21	ENSG00000175893	34.579	90.298	0.665	0.347	0	0	0.7488	1.9679	0	4.2091	2.41708	5.24408e-05	1.84233	3.13267e-08	38.892	203.057	0.212	0.745	-	hsa_circ_0008952	MLL
5:102432244-102433485	chr5	102432244	102433485	2.05107	0.0396173	-0.974032	0.0648656	GIN1	ENSG00000145723	6.676	27.434	0.232	1.092	0	0.5518	0.468	0.463	1.1742	1.1479	5.78576	1.45406e-05	1.30649	0.0209329	3.209	103.713	0.065	4.351	-	hsa_circ_0006499	MLL
9:125932180-125936121	chr9	125932180	125936121	2.40064	0.0396173	1.03324	0.00231894	STRBP	ENSG00000165209	3.803	19.435	0.009	0.023	1.158	0.8278	0.2808	0.8103	0.4697	0.3826	3.76554	0.0044819	1.06674	0.00128872	4.813	43.47	0.003	0.034	-	hsa_circ_0088425	MLL
12:40696590-40697936	chr12	40696590	40697936	5.30439	2.84e-08	4.87954	4.74e-13	LRRK2	ENSG00000188906	1.324	45.172	0.162	0.164	0	0	0	0	0	0	4.91396	3.32399e-07	2.49897	0.00166747	2.66	74.547	0.034	0.178	+	hsa_circ_0025887	Phi_or_like
12:28378727-28412375	chr12	28378727	28412375	2.31877	7.83e-08	1.29747	9.81e-05	CCDC91	ENSG00000123106	33.749	164.76	0.367	0.828	1.6212	4.4148	1.3104	2.0836	0	0.7653	4.06773	1.865e-18	0.98083	0.0233885	32.208	519.068	0.08	1.657	+	hsa_circ_0000386	Phi_or_like
21:37619814-37620866	chr21	37619814	37620866	2.24436	7.83e-08	2.16705	1.73e-07	DOPEY2	ENSG00000142197	31.021	147.572	1.68	0.922	3.9373	6.0703	1.9656	3.357	2.3484	0.3826	2.53237	5.31609e-07	1.8108	0.000563949	46.188	267.828	1.174	2.101	+	hsa_circ_0001187	Phi_or_like
2:231222519-231226412	chr2	231222519	231226412	3.07385	2.01e-05	2.4092	3.28e-10	SP140L	ENSG00000185404	4.562	39.854	0.083	0.089	0.2316	0	0.6552	0.2315	0.7045	0.3826	3.41691	4.37277e-07	1.44792	0.000376276	7.581	77.591	0.024	0.137	+	hsa_circ_0008382	Phi_or_like
X:100296305-100297301	chrX	100296305	100297301	3.0569	2.01e-05	0.378931	0.189685	TRMT2B	ENSG00000188917	6.616	53.994	0.086	0.457	0	0	0.0936	0.2315	0.2348	0	5.68284	2.80043e-08	1.46226	8.65072e-06	1.449	81.842	0.016	0.308	-	hsa_circ_0001937	Phi_or_like
19:45528586-45528995	chr19	45528586	45528995	3.13903	6.87e-05	2.83013	0.00107911	RELB	ENSG00000104856	4.111	35.062	0.358	0.207	0.9264	1.6555	0.468	0.9261	0.2348	2.6785	2.77417	0.0498685	3.5339	6.90967e-13	2.442	16.206	0.299	0.197	+	hsa_circ_0008590	Phi_or_like
17:40650941-40653322	chr17	40650941	40653322	5.53526	7.18e-05	4.05678	1.2e-11	ATP6V0A1	ENSG00000033627	0.585	17.797	0.065	0.145	0	0	0	0	0	1.5306	4.88251	7.88969e-06	2.58902	7.4634e-05	1.975	52.125	0.473	0.695	+	hsa_circ_0043837	Phi_or_like
3:149563797-149639014	chr3	149563797	149639014	2.12301	7.71e-05	1.50156	1.17e-06	RNF13	ENSG00000082996	28.405	125.744	0.275	0.466	3.2425	2.2074	2.808	3.5885	0.7045	6.5049	2.09201	2.00014e-05	1.65699	3.0112e-11	65.593	280.245	0.439	0.847	+	hsa_circ_0001346	Phi_or_like
5:122881110-122893258	chr5	122881110	122893258	2.63104	0.000103807	2.76104	0.000725395	CSNK1G3	ENSG00000151292	71.906	443.915	1.581	1.188	7.4114	4.9666	13.0104	15.9746	14.3253	4.5917	2.02348	0.000388083	1.79323	5.0603e-08	243.489	985.345	1.542	2.333	+	hsa_circ_0001522	Phi_or_like
5:56160560-56161804	chr5	56160560	56161804	2.60003	0.000103807	2.93836	4.63e-10	MAP3K1	ENSG00000095015	21.21	130.798	0.344	0.167	0.2316	0	6.552	7.5243	24.6583	1.9132	2.09761	0.000803186	2.6019	3.80542e-10	82.575	354.95	0.294	0.216	+	hsa_circ_0001485	Phi_or_like
2:231120166-231152681	chr2	231120166	231152681	4.98678	0.000153334	3.8875	0.000241528	SP140	ENSG00000079263	0.725	17.761	0.02	0.034	0	0	0	0	0	1.1479	6.84637	9.47934e-07	3.26418	0.00117107	0.395	48.838	0.002	0.042	NA	NA	Phi_or_like
14:71880664-71996087	chr14	71880664	71996087	2.93058	0.000247743	2.98597	2.91e-11	SIPA1L1	ENSG00000197555	5.558	40.331	0.33	2.021	0.6948	0.2759	0.1872	1.3891	0.4697	5.7396	4.55127	4.2889e-10	2.08263	1.74002e-05	8.562	189.702	0.223	12.621	NA	NA	Phi_or_like
21:34804483-34805178	chr21	34804483	34805178	2.33573	0.000276286	1.47674	0.0283793	IFNGR2	ENSG00000159128	16.387	81.416	0.074	0.121	5.5585	0	0.7488	0.463	0.2348	1.9132	1.98877	0.0206078	1.72503	NA	19.829	80.52	0.05	0.084	+	hsa_circ_0001185	Phi_or_like
5:122881110-122888841	chr5	122881110	122888841	5.18379	0.000276286	2.76104	0.000725395	CSNK1G3	ENSG00000151292	0.465	17.872	0.007	0.046	0.2316	0	0.7488	0.6945	0.7045	0	2.7178	0.00116549	1.79323	5.0603e-08	5.473	38.712	0.059	0.095	NA	NA	Phi_or_like
10:52193235-52350007	chr10	52193235	52350007	3.11361	0.000426053	1.96004	5.33e-06	SGMS1	ENSG00000198964	4.654	34.106	0.124	0.259	0.2316	0	1.2168	1.2733	1.1742	0.3826	2.11551	0.0386581	1.25176	3.14206e-05	12.725	52.794	0.087	0.44	-	hsa_circ_0018401	Phi_or_like
15:31266516-31269158	chr15	31266516	31269158	3.8194	0.000426053	1.45331	0.00306667	MTMR10	ENSG00000166912	1.883	24.324	0.024	0.083	0	0	0.0936	0.5788	0	0	3.84093	4.69138e-05	0.128627	0.848634	2.398	38.964	0.013	0.141	NA	NA	Phi_or_like
4:144464661-144465125	chr4	144464661	144465125	1.27291	0.000609823	0.167231	0.718531	SMARCA5	ENSG00000153147	438.84	1059.87	1.035	2.177	69.0182	59.5994	30.7943	43.4093	34.2868	27.5503	1.83628	9.34101e-05	-0.133374	0.644262	642.843	2291.88	0.482	3.468	+	hsa_circ_0001445	Phi_or_like
8:37734626-37735069	chr8	37734626	37735069	2.21177	0.00066631	3.04998	1.86e-05	RAB11FIP1	ENSG00000156675	10.782	50.434	0.36	0.174	0.4632	0	1.2168	1.5049	0.2348	2.2959	2.10083	0.000944381	1.95944	4.38543e-12	30.908	137.03	0.429	0.716	-	hsa_circ_0001789	Phi_or_like
12:28408513-28412375	chr12	28408513	28412375	2.40376	0.000695478	1.29747	9.81e-05	CCDC91	ENSG00000123106	15.063	78.215	0.15	0.35	1.158	1.1037	0.1872	1.0418	0	0.7653	4.09928	2.55556e-07	0.98083	0.0233885	10.829	162.443	0.023	0.525	+	hsa_circ_0000387	Phi_or_like
10:70719561-70720005	chr10	70719561	70720005	1.9666	0.000941821	2.76942	2.24e-15	DDX21	ENSG00000165732	18.626	75.797	0.079	0.037	5.3269	5.7944	2.1528	1.9679	1.1742	10.714	2.13033	0.00874623	0.607629	0.115086	20.92	91.152	0.021	0.087	+	hsa_circ_0008865	Phi_or_like
7:87068982-87069718	chr7	87068982	87069718	4.08771	0.000941821	2.95525	0.00291047	ABCB4	ENSG00000005471	0.95	20.501	0.077	0.152	0	0	0.1872	0	0.2348	0	2.76298	0.00445409	1.98717	0.000431688	6.335	46.621	0.089	0.18	-	hsa_circ_0080960	Phi_or_like
7:18705835-18706099	chr7	18705835	18706099	3.18647	0.00129167	3.00104	4.78e-10	HDAC9	ENSG00000048052	2.234	22.116	0.118	0.082	1.158	1.6555	4.68	1.7364	5.6362	0	3.90303	1.87772e-05	1.79799	5.47034e-05	4.25	55.466	0.048	0.099	+	hsa_circ_0007904	Phi_or_like
2:190584297-190585513	chr2	190584297	190585513	3.14851	0.00167841	1.47924	0.00162828	ANKAR	ENSG00000151687	2.443	20.994	0.375	0.82	0	0	0	0	0	0	3.54877	0.00133811	1.3472	0.0157454	3.53	41.086	0.162	1.043	NA	NA	Phi_or_like
3:56661064-56662642	chr3	56661064	56662642	1.7737	0.00229802	-0.0772967	0.837003	FAM208A	ENSG00000163946	26.408	91.962	0.127	0.346	0.6948	1.1037	1.5912	2.0836	2.1136	3.0611	2.48414	9.41285e-07	0.409339	0.144664	35.128	193.247	0.056	0.308	-	hsa_circ_0001314	Phi_or_like
3:57276883-57282379	chr3	57276883	57282379	1.8542	0.00265572	0.892715	0.0332691	APPL1	ENSG00000157500	15.315	54.986	0.074	0.122	1.158	0.8278	1.872	1.6206	2.5833	3.8264	2.07877	5.84129e-05	0.553352	0.0233026	32.807	138.846	0.049	0.184	+	hsa_circ_0001317	Phi_or_like
3:31917924-31921322	chr3	31917924	31921322	3.6013	0.00278809	4.2879	2.79e-13	OSBPL10	ENSG00000144645	1.997	22.54	0.081	0.073	0	0	0	0	0	0	4.76721	3.826e-06	3.33551	0.000251539	2.152	54.696	0.02	0.105	-	hsa_circ_0008549	Phi_or_like
1:15964801-15970145	chr1	15964801	15970145	2.01703	0.00316029	1.54621	1.47e-05	DDI2	ENSG00000197312	11.188	43.888	0.141	0.264	1.6212	2.2074	1.0296	1.8521	0.9394	1.5306	2.00513	0.00484143	0.0158236	0.964583	19.885	74.492	0.096	0.571	+	hsa_circ_0000019	Phi_or_like
15:44907560-44912601	chr15	44907560	44912601	2.19142	0.0031641	0.351586	0.199111	SPG11	ENSG00000104133	6.864	32.193	0.053	0.146	0.6948	2.4833	0.8424	0.6945	0	1.1479	2.00145	0.00523932	0.79181	0.00564617	23.279	94.932	0.077	0.226	-	hsa_circ_0003784	Phi_or_like
1:111690263-111703918	chr1	111690263	111703918	2.03326	0.00400397	2.10853	7.28e-12	CEPT1	ENSG00000134255	8.402	33.996	0.082	0.088	0.9264	0.8278	2.6208	1.3891	0.7045	3.4438	2.28608	0.000128333	0.55473	0.11135	16.795	83.466	0.078	0.324	+	hsa_circ_0000106	Phi_or_like
9:14639893-14680160	chr9	14639893	14680160	2.06161	0.00410492	2.77954	2.3e-07	ZDHHC21	ENSG00000175893	21.082	90.298	0.749	0.347	0	0	0.7488	1.9679	0	4.2091	3.66083	1.34056e-07	1.37987	0.00888413	16.751	203.057	0.121	0.745	-	hsa_circ_0008952	Phi_or_like
14:71867510-71884913	chr14	71867510	71884913	2.60685	0.004145	2.98597	2.91e-11	SIPA1L1	ENSG00000197555	5.937	35.768	0.358	1.579	0	0.5518	0.1872	0	0	2.6785	6.4284	1.00705e-08	2.08263	1.74002e-05	1.282	85.271	0.038	5.437	+	hsa_circ_0002722	Phi_or_like
7:23650789-23651172	chr7	23650789	23651172	1.71836	0.00450592	0.233655	0.743581	CCDC126	ENSG00000169193	30.194	100.29	2.013	5.567	3.0109	1.6555	0.2808	1.3891	2.8181	5.7396	3.29487	9.29622e-13	0.929688	0.0953267	27.044	267.375	1.019	4.782	+	hsa_circ_0001684	Phi_or_like
8:37971709-37976881	chr8	37971709	37976881	1.73743	0.00506593	-1.24076	0.000194694	ASH2L	ENSG00000129691	16.139	54.977	0.154	1.197	0.9264	1.6555	1.7784	1.6206	1.6439	3.8264	2.62091	5.90925e-06	-0.0336062	0.923274	16.68	106.591	0.057	0.788	+	hsa_circ_0001790	Phi_or_like
9:37126308-37126939	chr9	37126308	37126939	1.33071	0.00597207	-0.539479	0.425246	ZCCHC7	ENSG00000147905	39.318	98.271	0.062	0.23	5.0953	2.4833	35.0999	30.6759	18.7873	5.7396	2.00012	0.000274815	-1.29624	0.000426263	114.476	461.26	0.024	0.601	+	hsa_circ_0001860	Phi_or_like
12:31595708-31600703	chr12	31595708	31600703	4.08934	0.00653079	4.44875	0.000342991	DENND5B	ENSG00000170456	0.991	17.648	0.04	0.08	0	0.2759	0.0936	0.463	0.7045	1.1479	3.52577	0.000318939	4.241	7.26868e-08	3.426	44.757	0.094	0.153	-	hsa_circ_0008445	Phi_or_like
2:54278094-54284497	chr2	54278094	54284497	2.43847	0.00653079	0.957212	0.0434459	ACYP2	ENSG00000170634	5.412	28.237	0.14	0.33	0.4632	0.2759	0	0.2315	0	0	2.99493	0.00514959	1.3574	0.00965363	3.935	28.607	0.116	0.323	+	hsa_circ_0004462	Phi_or_like
4:42505466-42526864	chr4	42505466	42526864	3.05573	0.00696648	1.67907	3.31e-06	ATP8A1	ENSG00000124406	2.202	18.017	0.012	0.035	0.2316	2.2074	0.3744	0.5788	0.4697	1.5306	2.95405	0.00368475	0.723631	0.123348	5.674	43.021	0.013	0.063	-	hsa_circ_0069612	Phi_or_like
3:5215701-5216099	chr3	5215701	5216099	2.07011	0.00845582	0.630515	0.0526686	ARL8B	ENSG00000134108	27.906	117.393	0.205	0.728	0.6948	1.3796	0.2808	0.2315	0.2348	1.1479	2.90718	9.45999e-05	-0.03276	0.927576	15.907	117.402	0.071	0.313	+	hsa_circ_0001263	Phi_or_like
5:137320945-137324004	chr5	137320945	137324004	0.975714	0.00845582	0.441355	0.154056	FAM13B	ENSG00000031003	152.606	300.834	1.152	1.211	20.1496	25.6608	9.6408	13.891	16.204	20.2801	1.58042	0.00116549	0.364178	0.371099	226.974	676.924	0.799	2.055	-	hsa_circ_0001535	Phi_or_like
1:120572528-120594393	chr1	120572528	120594393	2.57917	0.0087627	3.71944	5.36e-19	NOTCH2	ENSG00000134250	3.388	20.222	0.146	0.046	0.6948	0	0.2808	0.1158	0	0	3.44022	0.00117307	2.5116	1.28424e-06	3.258	31.657	0.067	0.069	-	hsa_circ_0002128	Phi_or_like
2:207144263-207162097	chr2	207144263	207162097	3.75121	0.00920476	5.86468	2.66e-12	ZDBF2	ENSG00000204186	1.101	17.47	0.308	0.197	0	0	0	2.3152	0	1.5306	3.68481	0.000427517	3.50976	4.98188e-06	5.797	58.919	0.318	0.748	+	hsa_circ_0002141	Phi_or_like
7:22999874-23030758	chr7	22999874	23030758	2.06604	0.00931678	1.08349	0.0954822	FAM126A	ENSG00000122591	12.346	54.737	0.34	0.308	1.8528	1.3796	1.3104	1.8521	1.409	3.4438	1.54156	0.0215374	1.60554	3.67138e-05	43.508	126.544	0.31	0.551	-	hsa_circ_0008951	Phi_or_like
1:114372213-114377061	chr1	114372213	114377061	2.26599	0.0102625	1.22874	0.146963	PTPN22	ENSG00000134242	16.454	80.247	0.286	0.476	0.6948	0	0	0.6945	0	3.4438	2.02979	0.0244416	1.4935	0.0614435	22.394	93.775	0.168	0.473	-	hsa_circ_0000110	Phi_or_like
15:44624185-44630515	chr15	44624185	44630515	1.49257	0.0124823	0.246759	0.627204	CASC4	ENSG00000166734	18.826	53.43	0.088	0.139	1.158	0.8278	1.5912	1.8521	0.2348	0.7653	1.2796	0.0459041	0.586109	0.0414405	56.684	140.399	0.08	0.191	+	hsa_circ_0000596	Phi_or_like
20:30904020-30904677	chr20	30904020	30904677	2.33846	0.0150904	0.980886	0.00746533	KIF3B	ENSG00000101350	5.322	25.423	0.314	0.415	1.158	0.8278	0.468	1.3891	0.2348	0.7653	4.40894	2.33247e-07	1.89184	1.48307e-11	4.989	102.097	0.109	0.902	+	hsa_circ_0002302	Phi_or_like
12:90049455-90049884	chr12	90049455	90049884	2.99846	0.0173948	3.45811	1.13e-15	ATP2B1	ENSG00000070961	2.35	15.994	0.023	0.017	0.2316	1.1037	0.468	0.5788	0.4697	1.9132	3.28275	0.00754019	1.98163	3.76177e-12	2.95	27.918	0.011	0.037	-	hsa_circ_0007621	Phi_or_like
12:46622935-46648719	chr12	46622935	46648719	1.43319	0.0177293	-0.00979558	0.988083	SLC38A1	ENSG00000111371	27.283	72.917	0.036	0.092	0.2316	0	0.3744	2.3152	0.7045	1.5306	1.83713	0.0374625	-0.231509	0.622026	33.714	114.429	0.013	0.084	-	hsa_circ_0000397	Phi_or_like
4:103610730-103612114	chr4	103610730	103612114	2.84618	0.0177293	1.37681	1.44e-05	MANBA	ENSG00000109323	2.56	17.392	0.032	0.1	0.6948	0.2759	0.468	0	0	0.3826	3.14322	0.00104372	0.347732	0.291955	4.024	38.503	0.017	0.144	-	hsa_circ_0001429	Phi_or_like
10:11523768-11527910	chr10	11523768	11527910	2.06196	0.0211561	1.89944	5.04e-14	USP6NL	ENSG00000148429	7.121	29.93	0.083	0.058	0.6948	0	0.468	0.1158	0.7045	0.7653	3.11446	8.87073e-05	1.34712	0.000606347	6.606	54.903	0.029	0.092	-	hsa_circ_0017683	Phi_or_like
4:25848915-25849486	chr4	25848915	25849486	3.22539	0.0224547	2.74202	0.00953751	SEL1L3	ENSG00000091490	1.725	16.879	0.029	0.026	0	0	0.1872	0	0	0	3.3281	0.000842249	3.65215	2.75088e-07	4.323	42.973	0.021	0.026	NA	NA	Phi_or_like
9:14639893-14662324	chr9	14639893	14662324	3.38461	0.0234091	2.77954	2.3e-07	ZDHHC21	ENSG00000175893	1.623	20.301	0.079	0.07	0	0	0.0936	0.2315	0	0.3826	6.50039	4.54497e-06	1.37987	0.00888413	0.395	38.558	0.006	0.142	NA	NA	Phi_or_like
17:47388673-47389404	chr17	47388673	47389404	1.90211	0.0248247	1.24129	9.35e-06	ZNF652	ENSG00000198740	21.964	81.073	25.112	0.938	2.316	2.2074	2.1528	1.2733	0.7045	2.6785	3.24956	0.000318939	-0.112384	0.780454	11.076	102.47	0.222	7.967	-	hsa_circ_0003258	Phi_or_like
14:39746137-39748741	chr14	39746137	39748741	1.50327	0.026362	NA	NA	RP11-407N17.3	ENSG00000258941	17.234	48.057	0.219	0.2	2.7793	5.5185	2.34	2.6624	2.3484	1.5306	1.65628	0.0374625	NA	NA	26.014	81.406	0.124	0.43	+	hsa_circ_0000530	Phi_or_like
3:149563797-149589941	chr3	149563797	149589941	2.01472	0.026362	1.50156	1.17e-06	RNF13	ENSG00000082996	4.596	19.104	0.049	0.077	0.6948	1.1037	0.0936	0.463	0.2348	0	3.56868	0.00120616	1.65699	3.0112e-11	3.145	33.348	0.025	0.102	+	hsa_circ_0067716	Phi_or_like
X:80064511-80064803	chrX	80064511	80064803	2.63438	0.0282715	1.19412	0.00355587	BRWD3	ENSG00000165288	2.837	16.156	0.057	0.146	0	1.1037	0.1872	0.1158	0.2348	0.3826	4.34286	0.0295723	-0.244833	0.630444	0.703	8.644	0.003	0.07	-	hsa_circ_0091178	Phi_or_like
2:120830753-120836157	chr2	120830753	120836157	3.11263	0.0297262	4.14636	4.18e-07	EPB41L5	ENSG00000115109	1.645	14.577	0.298	0.192	0	1.3796	0.1872	0.3473	0.9394	0.3826	2.4721	0.0025457	0.969125	0.176042	7.711	44.744	0.144	0.58	+	hsa_circ_0001064	Phi_or_like
4:103644027-103647840	chr4	103644027	103647840	1.68424	0.0299034	1.37681	1.44e-05	MANBA	ENSG00000109323	8.887	30.004	0.123	0.169	1.3896	0.5518	0.936	5.0934	0	0.3826	2.21917	0.00176366	0.347732	0.291955	15.063	67.686	0.056	0.259	-	hsa_circ_0006007	Phi_or_like
12:121220457-121222396	chr12	121220457	121222396	0.966868	0.0335351	1.06536	0.0186398	SPPL3	ENSG00000157837	53.385	105.015	1.884	1.397	0.9264	6.3462	1.7784	1.5049	0.2348	3.0611	3.0306	4.83556e-09	0.523801	0.320788	41.302	325.296	1.295	13.357	-	hsa_circ_0003472	Phi_or_like
X:138897036-138908982	chrX	138897036	138908982	1.86279	0.042141	-0.0203136	0.959454	ATP11C	ENSG00000101974	5.791	21.655	0.084	0.18	0.4632	0.2759	0.936	0.8103	0.9394	2.2959	3.85602	0.000308683	-0.0385258	0.945061	3.268	37.622	0.01	0.139	-	hsa_circ_0002372	Phi_or_like
11:72695132-72700142	chr11	72695132	72700142	1.34543	0.0434541	2.76526	9.05e-08	FCHSD2	ENSG00000137478	36.156	93.764	0.603	0.118	3.9373	2.4833	2.2464	0.5788	1.8787	4.2091	2.30766	1.50513e-06	0.717559	0.169079	50.566	249.291	0.689	2.003	-	hsa_circ_0005918	Phi_or_like
20:57014000-57016139	chr20	57014000	57016139	1.05161	0.0440968	-0.153798	0.811693	VAPB	ENSG00000124164	52.989	111.77	2.562	1.022	11.8118	8.8295	7.488	7.0612	7.9846	4.2091	1.36011	0.043029	-0.277679	0.449744	69.92	177.126	1.582	3.042	+	hsa_circ_0001173	Phi_or_like
4:103635594-103647840	chr4	103635594	103647840	1.11445	0.0497648	1.37681	1.44e-05	MANBA	ENSG00000109323	29.117	64.276	0.371	0.356	0.9264	0.2759	1.7784	1.7364	2.3484	1.5306	1.67688	0.00137628	0.347732	0.291955	58.883	185.038	0.193	0.702	-	hsa_circ_0001432	Phi_or_like
3:5215701-5216099	chr3	5215701	5216099	3.55012	4.93e-08	0.71922	0.015649	ARL8B	ENSG00000134108	10.42	117.393	0.047	0.728	0.6948	1.3796	0.2808	0.2315	0.2348	1.1479	1.94567	0.00157523	0.259261	0.270067	30.369	117.402	0.091	0.313	+	hsa_circ_0001263	TCF3-PBX1
1:114372213-114377061	chr1	114372213	114377061	3.85399	2.5e-07	2.83733	2.19e-06	PTPN22	ENSG00000134242	4.625	80.247	0.135	0.476	0.6948	0	0	0.6945	0	3.4438	2.28702	0.000172968	3.06604	6.03089e-21	18.612	93.775	0.341	0.473	-	hsa_circ_0000110	TCF3-PBX1
12:40696590-40697936	chr12	40696590	40697936	7.63897	3.98e-07	5.39082	6.83e-68	LRRK2	ENSG00000188906	0	45.172	0	0.164	0	0	0	0	0	0	7.1106	4.38804e-08	4.7603	5.51145e-58	0.564	74.547	0.02	0.178	+	hsa_circ_0025887	TCF3-PBX1
21:34804483-34805178	chr21	34804483	34805178	3.52492	9.79e-05	2.93836	1.56e-16	IFNGR2	ENSG00000159128	6.166	81.416	0.045	0.121	5.5585	0	0.7488	0.463	0.2348	1.9132	2.7121	0.000314785	3.01165	5.64482e-89	12.527	80.52	0.039	0.084	+	hsa_circ_0001185	TCF3-PBX1
3:149563797-149639014	chr3	149563797	149639014	2.36752	0.00015993	2.01072	9.28e-09	RNF13	ENSG00000082996	23.482	125.744	0.162	0.466	3.2425	2.2074	2.808	3.5885	0.7045	6.5049	2.28002	2.12479e-06	2.33549	2.30473e-20	56.864	280.245	0.294	0.847	+	hsa_circ_0001346	TCF3-PBX1
3:31917924-31921322	chr3	31917924	31921322	6.64682	0.000172978	7.76099	2.21e-46	OSBPL10	ENSG00000144645	0	22.54	0	0.073	0	0	0	0	0	0	5.93326	5.15984e-06	6.59054	2.30144e-113	1.1	54.696	0.138	0.105	-	hsa_circ_0008549	TCF3-PBX1
X:100296305-100297301	chrX	100296305	100297301	3.22071	0.000207367	0.265797	0.428568	TRMT2B	ENSG00000188917	6.604	53.994	0.041	0.457	0	0	0.0936	0.2315	0.2348	0	3.32875	4.93064e-06	1.21118	4.75587e-12	8.394	81.842	0.033	0.308	-	hsa_circ_0001937	TCF3-PBX1
21:34793786-34805178	chr21	34793786	34805178	4.77863	0.00047131	2.93836	1.56e-16	IFNGR2	ENSG00000159128	1.888	28.756	0.013	0.04	0.4632	0	0.2808	0.6945	0	0.7653	3.10664	0.000327521	NA	NA	5.378	45.687	0.018	0.051	+	hsa_circ_0002113	TCF3-PBX1
4:144464661-144465125	chr4	144464661	144465125	1.50671	0.000670779	0.0643408	0.8886	SMARCA5	ENSG00000153147	377.401	1059.87	0.389	2.177	69.0182	59.5994	30.7943	43.4093	34.2868	27.5503	1.7041	0.000148975	0.0220018	0.914974	704.008	2291.88	0.414	3.468	+	hsa_circ_0001445	TCF3-PBX1
2:231120166-231152681	chr2	231120166	231152681	6.2933	0.000727299	6.3901	7.45e-35	SP140	ENSG00000079263	0	17.761	0	0.034	0	0	0	0	0	1.1479	5.77266	1.7269e-05	5.74896	1.16795e-25	1.074	48.838	0.012	0.042	NA	NA	TCF3-PBX1
5:32135677-32143986	chr5	32135677	32143986	3.39412	0.000727299	-1.11865	0.000538506	GOLPH3	ENSG00000113384	3.784	48.17	0.011	0.41	3.2425	0.2759	3.9312	1.3891	1.409	1.1479	2.04716	0.0191452	0.27408	0.0658147	13.718	56.063	0.017	0.106	-	hsa_circ_0001470	TCF3-PBX1
6:144858717-144860579	chr6	144858717	144860579	2.46407	0.000727299	2.40881	9.82e-11	UTRN	ENSG00000152818	12.289	69.605	0.058	0.065	1.8528	3.0352	0.6552	1.0418	0.2348	0.7653	2.23078	0.00585722	1.1358	0.00432814	27.406	126.313	0.026	0.119	+	hsa_circ_0001647	TCF3-PBX1
8:37971709-37976881	chr8	37971709	37976881	2.8323	0.000727299	-1.30288	0.00021163	ASH2L	ENSG00000129691	6.44	54.977	0.034	1.197	0.9264	1.6555	1.7784	1.6206	1.6439	3.8264	1.68543	0.0104213	-0.118712	0.494326	33.572	106.591	0.071	0.788	+	hsa_circ_0001790	TCF3-PBX1
17:47388673-47389404	chr17	47388673	47389404	2.33743	0.00155527	1.45507	0.00101029	ZNF652	ENSG00000198740	14.951	81.073	12.023	0.938	2.316	2.2074	2.1528	1.2733	0.7045	2.6785	2.26658	0.00588875	0.405549	0.223113	21.846	102.47	0.328	7.967	-	hsa_circ_0003258	TCF3-PBX1
2:190584297-190585513	chr2	190584297	190585513	4.82177	0.00216435	2.29261	3.48e-09	ANKAR	ENSG00000151687	0.52	20.994	0.1	0.82	0	0	0	0	0	0	4.97029	9.60119e-05	2.29892	1.01874e-12	1.326	41.086	0.08	1.043	NA	NA	TCF3-PBX1
8:37734626-37735069	chr8	37734626	37735069	2.81468	0.00216435	4.36285	2.66e-18	RAB11FIP1	ENSG00000156675	9.376	50.434	0.293	0.174	0.4632	0	1.2168	1.5049	0.2348	2.2959	4.50603	1.88727e-11	3.1976	1.49535e-24	6.591	137.03	0.104	0.716	-	hsa_circ_0001789	TCF3-PBX1
3:56661064-56662642	chr3	56661064	56662642	1.96613	0.0027214	-0.244563	0.488067	FAM208A	ENSG00000163946	21.877	91.962	0.052	0.346	0.6948	1.1037	1.5912	2.0836	2.1136	3.0611	2.37777	0.0028014	0.35299	0.00507034	37.42	193.247	0.044	0.308	-	hsa_circ_0001314	TCF3-PBX1
21:37619814-37620866	chr21	37619814	37620866	1.7388	0.00360737	1.95638	1.06e-05	DOPEY2	ENSG00000142197	42.473	147.572	1.052	0.922	3.9373	6.0703	1.9656	3.357	2.3484	0.3826	2.56315	0.00125597	2.22154	1.54478e-13	45.53	267.828	0.813	2.101	+	hsa_circ_0001187	TCF3-PBX1
7:87068982-87069718	chr7	87068982	87069718	4.12421	0.00640114	2.61291	2.09e-08	ABCB4	ENSG00000005471	0.902	20.501	0.054	0.152	0	0	0.1872	0	0.2348	0	2.9252	0.00719623	1.72064	3.10664e-05	5.871	46.621	0.029	0.18	-	hsa_circ_0080960	TCF3-PBX1
5:122881110-122893258	chr5	122881110	122893258	1.31439	0.00672457	2.06358	3.79e-08	CSNK1G3	ENSG00000151292	177.348	443.915	1.247	1.188	7.4114	4.9666	13.0104	15.9746	14.3253	4.5917	1.52916	0.00100062	2.00272	1.51801e-21	341.925	985.345	1.481	2.333	+	hsa_circ_0001522	TCF3-PBX1
14:71880664-71996087	chr14	71880664	71996087	2.53371	0.00902632	2.89744	2.55e-13	SIPA1L1	ENSG00000197555	6.7	40.331	0.252	2.021	0.6948	0.2759	0.1872	1.3891	0.4697	5.7396	4.57037	2.44295e-13	2.47092	3.37852e-23	8.69	189.702	0.203	12.621	NA	NA	TCF3-PBX1
12:28378727-28412375	chr12	28378727	28412375	1.44627	0.0129509	0.810149	0.0381651	CCDC91	ENSG00000123106	62.326	164.76	0.295	0.828	1.6212	4.4148	1.3104	2.0836	0	0.7653	3.03484	1.80465e-07	0.745756	0.0435869	63.821	519.068	0.105	1.657	+	hsa_circ_0000386	TCF3-PBX1
17:40650941-40653322	chr17	40650941	40653322	3.93785	0.0133109	2.97594	0.00144739	ATP6V0A1	ENSG00000033627	0.854	17.797	0.057	0.145	0	0	0	0	0	1.5306	2.34338	0.00465972	1.46525	0.000112065	9.68	52.125	0.114	0.695	+	hsa_circ_0043837	TCF3-PBX1
3:169889160-169896726	chr3	169889160	169896726	4.26366	0.0144437	2.37258	4.36e-11	PHC3	ENSG00000173889	0.63	16.053	0.008	0.038	0.9264	0.2759	1.404	0.9261	0.4697	1.9132	2.20318	0.0133297	0.91469	0.000483867	6.588	29.094	0.036	0.154	-	hsa_circ_0005362	TCF3-PBX1
2:190593385-190609514	chr2	190593385	190609514	2.52435	0.0151644	2.29261	3.48e-09	ANKAR	ENSG00000151687	5.955	38.583	0.751	1.497	0.6948	0.2759	0.6552	0.8103	0.7045	0	1.64196	0.0213424	2.29892	1.01874e-12	15.18	47.963	0.81	1.285	+	hsa_circ_0005644	TCF3-PBX1
12:46622935-46648719	chr12	46622935	46648719	2.09932	0.0168674	0.774657	0.0334071	SLC38A1	ENSG00000111371	14.824	72.917	0.022	0.092	0.2316	0	0.3744	2.3152	0.7045	1.5306	1.62707	0.00191183	0.261496	0.119914	36.689	114.429	0.017	0.084	-	hsa_circ_0000397	TCF3-PBX1
17:61841375-61842207	chr17	61841375	61842207	4.16764	0.0194061	0.691242	0.102274	CCDC47	ENSG00000108588	1.754	15.978	0.005	0.152	0.6948	0.2759	0.1872	0	0.4697	0.3826	3.58085	0.0217354	0.0496922	0.777001	1.299	15.601	0.003	0.064	-	hsa_circ_0009168	TCF3-PBX1
3:141231004-141259451	chr3	141231004	141259451	2.83195	0.0225536	3.08092	2.27e-06	RASA2	ENSG00000155903	3.722	23.182	0.107	0.075	0.4632	1.3796	0.6552	0.1158	0	0.3826	4.06941	7.30371e-06	2.18333	4.11355e-14	3.865	55.873	0.02	0.113	+	hsa_circ_0067582	TCF3-PBX1
2:207144263-207162097	chr2	207144263	207162097	4.00378	0.0237007	6.76679	3.53e-42	ZDBF2	ENSG00000204186	0.87	17.47	1.128	0.197	0	0	0	2.3152	0	1.5306	2.63737	0.0049351	2.59062	0.000124478	9.477	58.919	0.619	0.748	+	hsa_circ_0002141	TCF3-PBX1
10:70719561-70720005	chr10	70719561	70720005	2.06289	0.0255844	2.19359	2.7e-14	DDX21	ENSG00000165732	18.995	75.797	0.027	0.037	5.3269	5.7944	2.1528	1.9679	1.1742	10.714	2.9256	8.74865e-05	0.686767	0.00173618	12.323	91.152	0.01	0.087	+	hsa_circ_0008865	TCF3-PBX1
20:57014000-57016139	chr20	57014000	57016139	1.46283	0.027636	0.104033	0.753576	VAPB	ENSG00000124164	38.297	111.77	1.082	1.022	11.8118	8.8295	7.488	7.0612	7.9846	4.2091	1.06836	0.0482329	0.600876	0.00184679	85.187	177.126	2.945	3.042	+	hsa_circ_0001173	TCF3-PBX1
9:37126308-37126939	chr9	37126308	37126939	1.6301	0.0276979	-1.22331	0.000822168	ZCCHC7	ENSG00000147905	29.915	98.271	0.013	0.23	5.0953	2.4833	35.0999	30.6759	18.7873	5.7396	2.25034	2.10099e-06	-1.03411	3.88219e-08	96.916	461.26	0.014	0.601	+	hsa_circ_0001860	TCF3-PBX1
1:120572528-120594393	chr1	120572528	120594393	3.32962	0.0290206	1.97985	0.00121518	NOTCH2	ENSG00000134250	1.591	20.222	0.02	0.046	0.6948	0	0.2808	0.1158	0	0	4.51702	0.00035436	0.931262	0.00850347	1.691	31.657	0.005	0.069	-	hsa_circ_0002128	TCF3-PBX1
1:24840803-24841057	chr1	24840803	24841057	2.34496	0.0301073	1.18832	0.088829	RCAN3	ENSG00000117602	7.674	41.897	0.31	0.474	1.3896	0.2759	0.6552	1.0418	0	0	1.89546	0.00514882	1.02777	0.019366	40.021	148.358	1.129	3.119	+	hsa_circ_0003553	TCF3-PBX1
3:149563797-149589941	chr3	149563797	149589941	3.35079	0.0328642	2.01072	9.28e-09	RNF13	ENSG00000082996	3.501	19.104	0.022	0.077	0.6948	1.1037	0.0936	0.463	0.2348	0	3.40943	0.000864569	2.33549	2.30473e-20	3.29	33.348	0.013	0.102	+	hsa_circ_0067716	TCF3-PBX1
9:14639893-14680160	chr9	14639893	14680160	1.59044	0.0329757	3.0516	3.83e-18	ZDHHC21	ENSG00000175893	30.609	90.298	0.606	0.347	0	0	0.7488	1.9679	0	4.2091	2.8562	1.49682e-08	1.73192	2.16944e-07	27.521	203.057	0.209	0.745	-	hsa_circ_0008952	TCF3-PBX1
2:54278094-54284497	chr2	54278094	54284497	2.38982	0.0360667	1.57225	3.49e-06	ACYP2	ENSG00000170634	5.505	28.237	0.125	0.33	0.4632	0.2759	0	0.2315	0	0	3.17845	0.00182327	1.23001	6.29368e-05	3.344	28.607	0.05	0.323	+	hsa_circ_0004462	TCF3-PBX1
15:44907560-44912601	chr15	44907560	44912601	2.20157	0.0366714	0.637557	0.0365912	SPG11	ENSG00000104133	5.874	32.193	0.038	0.146	0.6948	2.4833	0.8424	0.6945	0	1.1479	3.12713	1.88929e-05	1.06662	0.000106315	11.094	94.932	0.027	0.226	-	hsa_circ_0003784	TCF3-PBX1
16:16101672-16130460	chr16	16101672	16130460	2.51051	0.0369782	0.53242	0.167551	ABCC1	ENSG00000103222	3.535	24.123	0.04	0.15	0	0.8278	0	0.5788	0	0	2.32325	0.000236708	0.705186	7.12536e-07	14.082	69.337	0.203	1.757	+	hsa_circ_0038076	TCF3-PBX1
1:114391161-114397671	chr1	114391161	114397671	3.19894	0.0373173	2.83733	2.19e-06	PTPN22	ENSG00000134242	1.867	21.25	0.064	0.131	0	0	0	0.1158	0	2.2959	3.56954	0.00035436	3.06604	6.03089e-21	3.29	37.342	0.045	0.189	-	hsa_circ_0000111	TCF3-PBX1
15:64404771-64415745	chr15	64404771	64415745	4.0199	0.0386969	0.562479	0.0866855	SNX1	ENSG00000028528	0.52	12.392	0.002	0.057	0.2316	0.2759	0.2808	0.3473	0	0.3826	3.26358	0.0355625	0.449543	0.00737933	1.664	13.605	0.003	0.03	+	hsa_circ_0002178	TCF3-PBX1
4:54292038-54294350	chr4	54292038	54294350	3.40803	0.0389525	0.390664	0.321378	FIP1L1	ENSG00000145216	1.149	14.668	0.003	0.069	1.3896	0.8278	0.1872	0.2315	0.2348	0	2.60832	0.00665514	-0.485417	0.00651818	5.206	30.45	0.004	0.054	+	hsa_circ_0069748	TCF3-PBX1
12:28408513-28412375	chr12	28408513	28412375	1.85597	0.0434791	0.810149	0.0381651	CCDC91	ENSG00000123106	22.337	78.215	0.117	0.35	1.158	1.1037	0.1872	1.0418	0	0.7653	2.97945	6.61496e-08	0.745756	0.0435869	21.385	162.443	0.037	0.525	+	hsa_circ_0000387	TCF3-PBX1
12:109046047-109048186	chr12	109046047	109048186	2.33669	0.0450944	2.29486	0.00244972	CORO1C	ENSG00000110880	9.632	50.1	0.234	0.411	7.8746	5.5185	3.744	5.7879	4.6968	34.0553	5.99945	3.06466e-24	3.48229	8.53965e-103	9.2	542.024	0.14	1.681	-	hsa_circ_0000437	TCF3-PBX1
16:27357787-27364017	chr16	27357787	27364017	4.23878	0.0471047	3.77816	3.29e-09	IL4R	ENSG00000077238	0.414	12.57	0.011	0.022	0	0	0	0	0	0	6.38723	4.93064e-06	4.93421	1.52048e-57	0.381	45.143	0.006	0.033	+	hsa_circ_0038724	TCF3-PBX1

## Sheet: Table S3_annotations_circBank_
original.circbaseID	circbaseID	position	logfc.discovery	padj.discovery	symbol	gene_name	circBankID	strand	splicedSeqLength	annotation	coding_prob	m6A.levels	conserved_in_mouse	miRNAs	sequence
208309	hsa_circ_0000118	chr1:117944807-117963271	-1315810688	0.043479109	MAN1A2	ENSG00000198162	hsa_circMAN1A2_008	+	553	ANNOTATED, CDS, coding, INTERNAL	0.62855024231816	0.837060924	NA	hsa-miR-4775:313.00, hsa-miR-7151-5p:173.00, hsa-miR-135a-3p:171.00, hsa-miR-95-5p:165.00, hsa-miR-449a:163.00, hsa-miR-449b-5p:163.00	GGAAGAGGAAGAACGTCTGAGAAATAAAATTCGAGCTGATCATGAGAAGGCCTTGGAAGAAGCAAAAGAAAAATTAAGAAAGTCAAGAGAGGAAATTCGAGCAGAAATTCAGACAGAGAAAAATAAGGTAGTCCAAGAAATGAAGATAAAAGAGAACAAGCCACTGCCACCAGTCCCTATTCCCAACCTTGTAGGAATACGTGGTGGAGACCCAGAAGATAATGACATAAGAGAGAAAAGGGAAAAAATTAAAGAGATGATGAAACATGCTTGGGATAACTATAGGACATATGGGTGGGGACATAATGAACTCAGACCTATTGCAAGGAAAGGACACTCCCCTAACATATTTGGAAGTTCACAAATGGGTGCTACCATAGTAGATGCTTTGGATACCCT…
59902	hsa_circ_0000119	chr1:117944807-117984947	-1879340399	0.007751451	MAN1A2	ENSG00000198162	hsa_circMAN1A2_009	+	648	ANNOTATED, CDS, coding, INTERNAL	0.999999923142777	0.176312483	NA	hsa-miR-4775:313.00, hsa-miR-7151-5p:173.00, hsa-miR-135a-3p:171.00, hsa-miR-95-5p:165.00, hsa-miR-449a:163.00, hsa-miR-449b-5p:163.00	GGAAGAGGAAGAACGTCTGAGAAATAAAATTCGAGCTGATCATGAGAAGGCCTTGGAAGAAGCAAAAGAAAAATTAAGAAAGTCAAGAGAGGAAATTCGAGCAGAAATTCAGACAGAGAAAAATAAGGTAGTCCAAGAAATGAAGATAAAAGAGAACAAGCCACTGCCACCAGTCCCTATTCCCAACCTTGTAGGAATACGTGGTGGAGACCCAGAAGATAATGACATAAGAGAGAAAAGGGAAAAAATTAAAGAGATGATGAAACATGCTTGGGATAACTATAGGACATATGGGTGGGGACATAATGAACTCAGACCTATTGCAAGGAAAGGACACTCCCCTAACATATTTGGAAGTTCACAAATGGGTGCTACCATAGTAGATGCTTTGGATACCCT…
0	hsa_circ_0010023	chr1:12638745-12639440	-5375204345	0.002243921	DHRS3	ENSG00000162496	hsa_circDHRS3_007	-	359	ANNOTATED, CDS, coding, INTERNAL, OVCODE, OVERLAPTX, OVEXON	0.957384097133292	NA	NA	hsa-miR-345-5p:320.00, hsa-miR-4655-5p:188.00, hsa-miR-4632-5p:173.00, hsa-miR-3122:167.00, hsa-miR-1250-5p:166.00	GTGGGTGACATCACCATCCTGGTGAACAATGCCGCCGTGGTCCATGGGAAGAGCCTAATGGACAGTGATGATGATGCCCTCCTCAAGTCCCAACACATCAACACCCTGGGCCAGTTCTGGACCACCAAGGCCTTCCTGCCACGTATGCTGGAGCTGCAGAATGGCCACATCGTGTGCCTCAACTCCGTGCTGGCACTGTCTGCCATCCCCGGTGCCATCGACTACTGCACATCCAAAGCGTCAGCCTTCGCCTTCATGGAGAGCCTGACCCTGGGGCTGCTGGACTGTCCGGGAGTCAGCGCCACCACAGTGCTGCCCTTCCACACCAGCACCGAGATGTTCCAGGGCATGAGAGTCAG
0	hsa_circ_0010023	chr1:12638745-12639440	-5326252474	0.002449221	DHRS3	ENSG00000162496	hsa_circDHRS3_007	-	359	ANNOTATED, CDS, coding, INTERNAL, OVCODE, OVERLAPTX, OVEXON	0.957384097133292	NA	NA	hsa-miR-345-5p:320.00, hsa-miR-4655-5p:188.00, hsa-miR-4632-5p:173.00, hsa-miR-3122:167.00, hsa-miR-1250-5p:166.00	GTGGGTGACATCACCATCCTGGTGAACAATGCCGCCGTGGTCCATGGGAAGAGCCTAATGGACAGTGATGATGATGCCCTCCTCAAGTCCCAACACATCAACACCCTGGGCCAGTTCTGGACCACCAAGGCCTTCCTGCCACGTATGCTGGAGCTGCAGAATGGCCACATCGTGTGCCTCAACTCCGTGCTGGCACTGTCTGCCATCCCCGGTGCCATCGACTACTGCACATCCAAAGCGTCAGCCTTCGCCTTCATGGAGAGCCTGACCCTGGGGCTGCTGGACTGTCCGGGAGTCAGCGCCACCACAGTGCTGCCCTTCCACACCAGCACCGAGATGTTCCAGGGCATGAGAGTCAG
0	hsa_circ_0008264	chr1:201786215-201786413	-3895158849	0.043454065	NAV1	ENSG00000134369	hsa_circNAV1_024	+	198	ANNOTATED, CDS, coding, INTERNAL, OVCODE, OVEXON	0.878251069178382	NA	NA	hsa-miR-342-5p:175.00, hsa-miR-6766-5p:166.00, hsa-miR-6756-5p:164.00, hsa-miR-6769b-5p:164.00, hsa-miR-6876-3p:164.00	GTCCATGGACAGAAAGCTGCTTGGGAGGACCCAGTGGAATGGGTCCGGGACACACTTCCCTGGCCATCAGCCCAACAAGACCAATCAAAGCTGTACCACCTGCCCCCACCCACCGTGGGCCCTCACAGCATTGCCTCACCTCCCGAGGATAGGACAGTCAAAGACAGCACCCCAAGTTCTCTGGACTCAGATCCTCTG
0	hsa_circ_0009366	chr1:2066700-2087531	-4917446874	0.028639518	PRKCZ	ENSG00000067606	hsa_circPRKCZ_003	+	640	ANNOTATED, CDS, coding, INTERNAL, OVCODE, OVEXON	0.998619247647762	NA	chr4_155286779_155301015_-	hsa-miR-6767-3p:179.00, hsa-miR-5187-5p:171.00, hsa-miR-1255a:167.00, hsa-miR-518d-3p:167.00, hsa-miR-942-5p:165.00	AATCTATCTACCGCCGGGGAGCCAGAAGATGGAGGAAGCTGTACCGTGCCAACGGCCACCTCTTCCAAGCCAAGCGCTTTAACAGGAGAGCGTACTGCGGTCAGTGCAGCGAGAGGATATGGGGCCTCGCGAGGCAAGGCTACAGGTGCATCAACTGCAAACTGCTGGTCCATAAGCGCTGCCACGGCCTCGTCCCGCTGACCTGCAGGAAGCATATGGATTCTGTCATGCCTTCCCAAGAGCCTCCAGTAGACGACAAGAACGAGGACGCCGACCTTCCTTCCGAGGAGACAGATGGAATTGCTTACATTTCCTCATCCCGGAAGCATGACAGCATTAAAGACGACTCGGAGGACCTTAAGCCAGTTATCGATGGGATGGATGGAATCAAAATCTCTC…
11971	hsa_circ_0000192	chr1:230313963-230339036	-2318507929	0.002213249	GALNT2	ENSG00000143641	hsa_circGALNT2_005	+	248	ANNOTATED, CDS, coding, INTERNAL, OVCODE, OVEXON	0.664742969791029	0.050527018	NA	hsa-miR-136-5p:171.00, hsa-miR-4701-5p:163.00, hsa-miR-3619-3p:161.00, hsa-miR-4679:161.00, hsa-miR-6809-3p:160.00	GAGGACTGGAATGAAATTGACCCCATTAAAAAGAAAGACCTTCATCACAGCAATGGAGAAGAGAAAGCACAAAGCATGGAGACCCTCCCTCCAGGGAAAGTACGGTGGCCAGACTTTAACCAGGAAGCTTATGTTGGAGGGACGATGGTCCGCTCCGGGCAGGACCCTTACGCCCGCAACAAGTTCAACCAGGTGGAGAGTGATAAGCTTCGAATGGACAGAGCCATCCCTGACACCCGGCATGACCA
1563	hsa_circ_0000039	chr1:29068914-29070498	-3472168339	0.028917922	YTHDF2	ENSG00000198492	hsa_circYTHDF2_003	+	1584	ANNOTATED, CDS, coding, INTERNAL	1	0.984581946	chr4_132204131_132205715_-	hsa-miR-3912-5p:472.00, hsa-miR-7974:325.00, hsa-miR-671-5p:320.00, hsa-miR-4507:316.00, hsa-miR-6719-3p:314.00	AATAATGCATATACTGCCATGTCAGATTCCTACTTACCCAGTTACTACAGTCCCTCCATTGGCTTCTCCTATTCTTTGGGTGAAGCTGCTTGGTCTACGGGGGGTGACACAGCCATGCCCTACTTAACTTCTTATGGACAGCTGAGCAACGGAGAGCCCCACTTCCTACCAGATGCAATGTTTGGGCAACCAGGAGCCCTAGGTAGCACTCCATTTCTTGGTCAGCATGGTTTTAATTTCTTTCCCAGTGGGATTGACTTCTCAGCATGGGGAAATAACAGTTCTCAGGGACAGTCTACTCAGAGCTCTGGATATAGTAGCAATTATGCTTATGCACCTAGCTCCTTAGGTGGAGCCATGATTGATGGACAGTCAGCTTTTGCCAATGAGACCCTCAAT…
0	hsa_circ_0012152	chr1:44877652-44878394	-7797824698	4.25e-05	RNF220	ENSG00000187147	hsa_circRNF220_001	+	742	ANNOTATED, CDS, coding, INTERNAL, OVCODE, OVEXON, UTR5	0.981583615859224	0.355013922	NA	hsa-miR-6880-5p:328.00, hsa-miR-939-5p:311.00, hsa-miR-4723-5p:307.00, hsa-miR-7847-3p:304.00, hsa-miR-6870-5p:301.00	GTCTTAGGAGGGAATGATTCCCCAGTAATATTCCCTGCCCTGACCCAAAGTGCTGGTTGGCCTCCCTCCCAGGGAAGACTGCTTCTTGCGTAACGCCGGCCACAGAAAGAGACTCCGATGGACTTACACCGGGCAGCCTTCAAGATGGAGAACTCATCCTACCTTCCCAACCCTCTGGCATCCCCAGCACTGATGGTCCTGGCATCCACGGCTGAGGCCAGCCGTGATGCTTCCATCCCTTGTCAGCAGCCACGACCCTTTGGTGTACCTGTCTCAGTTGACAAGGACGTGCATATTCCTTTCACCAACGGTTCCTATACCTTTGCCTCTATGTACCATCGGCAAGGTGGGGTGCCAGGCACTTTTGCCAATCGTGATTTCCCCCCTTCTCTACTACAC…
0	hsa_circ_0002563	chr1:45223227-45223812	-4002748874	0.029554911	KIF2C	ENSG00000142945	hsa_circKIF2C_012	+	247	ANNOTATED, CDS, coding, INTERNAL, OVCODE, OVEXON	0.308898769698479	0.000377597	NA	hsa-miR-4752:166.00, hsa-miR-5693:164.00, hsa-miR-3674:162.00, hsa-miR-6866-3p:156.00, hsa-miR-204-5p:154.00, hsa-miR-211-5p:154.00, hsa-miR-766-5p:154.00	GTTCACAGCAAGGCCACTGGTACAGACAATCTTTGAAGGTGGAAAAGCAACTTGTTTTGCATATGGCCAGACAGGAAGTGGCAAGACACATACTATGGGCGGAGACCTCTCTGGGAAAGCCCAGAATGCATCCAAAGGGATCTATGCCATGGCCTCCCGGGACGTCTTCCTCCTGAAGAATCAACCCTGCTACCGGAAGTTGGGCCTGGAAGTCTATGTGACATTCTTCGAGATCTACAATGGGAAG
0	hsa_circ_0012300	chr1:46521466-46546422	-5790932705	0.001179796	PIK3R3	ENSG00000117461	hsa_circPIK3R3_006	-	835	ANNOTATED, CDS, coding, INTERNAL, OVCODE, OVEXON	0.998822190101359	0.977049842	NA	hsa-miR-2681-5p:303.00, hsa-miR-3183:179.00, hsa-miR-607:171.00, hsa-miR-3917:169.00, hsa-miR-4693-3p:168.00	CTCTTCCACCAAAGCCACCTAAGCCAATGACTTCAGCAGTTCCAAATGGAATGAAGGACAGTTCTGTTTCTCTTCAGGATGCAGAATGGTACTGGGGGGATATTTCAAGGGAGGAGGTAAATGACAAATTGCGGGATATGCCAGATGGGACCTTCTTGGTCCGAGATGCCTCAACAAAAATGCAGGGAGATTATACTTTGACTTTGCGGAAGGGAGGCAATAATAAGTTAATAAAGATCTATCACCGGGATGGTAAATATGGCTTTTCTGATCCTCTGACATTTAATTCCGTGGTGGAGCTCATTAACCACTATCACCATGAATCTCTTGCTCAGTACAATCCCAAACTTGATGTGAAGCTGATGTACCCAGTGTCCAGATACCAACAGGATCAGTTGG…
4763	hsa_circ_0020093	chr10:116879948-116889297	-5864237618	1.12e-10	ATRNL1	ENSG00000107518	hsa_circATRNL1_004	+	536	ANNOTATED, CDS, coding, INTERNAL, OVCODE, OVEXON	0.338432268705667	0.000267494	NA	hsa-miR-448:171.00, hsa-miR-18b-5p:169.00, hsa-miR-18a-5p:166.00, hsa-miR-4775:165.00, hsa-miR-890:162.00	GTTAACAGAACCTTCTGGATATTTAACAGATGGCCCAATTAACTATAAATATAAAACTAAATGTACTTGGCTCATTGAAGGCTATCCAAATGCAGTGTTAAGATTAAGATTCAATCATTTTGCTACAGAATGTAGCTGGGATCATATGTATGTTTATGATGGAGATTCAATATATGCACCTTTAATAGCTGTACTTAGTGGTTTGATAGTCCCTGAAATAAGGGGCAATGAAACTGTGCCTGAAGTTGTTACTACATCTGGCTATGCACTGTTACATTTTTTTAGTGATGCTGCGTATAATCTAACTGGTTTCAACATTTTCTATTCAATCAATTCTTGTCCTAACAATTGCTCTGGTCATGGGAAGTGTACAACTAGTGTCTCTGTTCCAAGTCAAGT…
4763	hsa_circ_0020093	chr10:116879948-116889297	-4190206587	2.25e-05	ATRNL1	ENSG00000107518	hsa_circATRNL1_004	+	536	ANNOTATED, CDS, coding, INTERNAL, OVCODE, OVEXON	0.338432268705667	0.000267494	NA	hsa-miR-448:171.00, hsa-miR-18b-5p:169.00, hsa-miR-18a-5p:166.00, hsa-miR-4775:165.00, hsa-miR-890:162.00	GTTAACAGAACCTTCTGGATATTTAACAGATGGCCCAATTAACTATAAATATAAAACTAAATGTACTTGGCTCATTGAAGGCTATCCAAATGCAGTGTTAAGATTAAGATTCAATCATTTTGCTACAGAATGTAGCTGGGATCATATGTATGTTTATGATGGAGATTCAATATATGCACCTTTAATAGCTGTACTTAGTGGTTTGATAGTCCCTGAAATAAGGGGCAATGAAACTGTGCCTGAAGTTGTTACTACATCTGGCTATGCACTGTTACATTTTTTTAGTGATGCTGCGTATAATCTAACTGGTTTCAACATTTTCTATTCAATCAATTCTTGTCCTAACAATTGCTCTGGTCATGGGAAGTGTACAACTAGTGTCTCTGTTCCAAGTCAAGT…
4763	hsa_circ_0020093	chr10:116879948-116889297	-4070039174	0.01243158	ATRNL1	ENSG00000107518	hsa_circATRNL1_004	+	536	ANNOTATED, CDS, coding, INTERNAL, OVCODE, OVEXON	0.338432268705667	0.000267494	NA	hsa-miR-448:171.00, hsa-miR-18b-5p:169.00, hsa-miR-18a-5p:166.00, hsa-miR-4775:165.00, hsa-miR-890:162.00	GTTAACAGAACCTTCTGGATATTTAACAGATGGCCCAATTAACTATAAATATAAAACTAAATGTACTTGGCTCATTGAAGGCTATCCAAATGCAGTGTTAAGATTAAGATTCAATCATTTTGCTACAGAATGTAGCTGGGATCATATGTATGTTTATGATGGAGATTCAATATATGCACCTTTAATAGCTGTACTTAGTGGTTTGATAGTCCCTGAAATAAGGGGCAATGAAACTGTGCCTGAAGTTGTTACTACATCTGGCTATGCACTGTTACATTTTTTTAGTGATGCTGCGTATAATCTAACTGGTTTCAACATTTTCTATTCAATCAATTCTTGTCCTAACAATTGCTCTGGTCATGGGAAGTGTACAACTAGTGTCTCTGTTCCAAGTCAAGT…
1177	hsa_circ_0020094	chr10:116879948-116925405	-4151961877	0.037296619	ATRNL1	ENSG00000107518	hsa_circATRNL1_006	+	799	ANNOTATED, CDS, coding, INTERNAL, OVCODE, OVEXON	0.981292903336021	NA	NA	hsa-miR-3133:309.00, hsa-miR-543:306.00, hsa-miR-181a-5p:305.00, hsa-miR-340-5p:173.00, hsa-miR-448:171.00, hsa-miR-6873-5p:171.00, hsa-miR-936:171.00	GTTAACAGAACCTTCTGGATATTTAACAGATGGCCCAATTAACTATAAATATAAAACTAAATGTACTTGGCTCATTGAAGGCTATCCAAATGCAGTGTTAAGATTAAGATTCAATCATTTTGCTACAGAATGTAGCTGGGATCATATGTATGTTTATGATGGAGATTCAATATATGCACCTTTAATAGCTGTACTTAGTGGTTTGATAGTCCCTGAAATAAGGGGCAATGAAACTGTGCCTGAAGTTGTTACTACATCTGGCTATGCACTGTTACATTTTTTTAGTGATGCTGCGTATAATCTAACTGGTTTCAACATTTTCTATTCAATCAATTCTTGTCCTAACAATTGCTCTGGTCATGGGAAGTGTACAACTAGTGTCTCTGTTCCAAGTCAAGT…
1177	hsa_circ_0020094	chr10:116879948-116925405	-3619645425	0.042496853	ATRNL1	ENSG00000107518	hsa_circATRNL1_006	+	799	ANNOTATED, CDS, coding, INTERNAL, OVCODE, OVEXON	0.981292903336021	NA	NA	hsa-miR-3133:309.00, hsa-miR-543:306.00, hsa-miR-181a-5p:305.00, hsa-miR-340-5p:173.00, hsa-miR-448:171.00, hsa-miR-6873-5p:171.00, hsa-miR-936:171.00	GTTAACAGAACCTTCTGGATATTTAACAGATGGCCCAATTAACTATAAATATAAAACTAAATGTACTTGGCTCATTGAAGGCTATCCAAATGCAGTGTTAAGATTAAGATTCAATCATTTTGCTACAGAATGTAGCTGGGATCATATGTATGTTTATGATGGAGATTCAATATATGCACCTTTAATAGCTGTACTTAGTGGTTTGATAGTCCCTGAAATAAGGGGCAATGAAACTGTGCCTGAAGTTGTTACTACATCTGGCTATGCACTGTTACATTTTTTTAGTGATGCTGCGTATAATCTAACTGGTTTCAACATTTTCTATTCAATCAATTCTTGTCCTAACAATTGCTCTGGTCATGGGAAGTGTACAACTAGTGTCTCTGTTCCAAGTCAAGT…
2905	hsa_circ_0092763	chr10:116879948-116931050	-4337433907	0.000727299	ATRNL1	ENSG00000272811	hsa_circATRNL1_007	+	1055	ANNOTATED, CDS, coding, INTERNAL, OVCODE, OVEXON	0.9921261	0.299771508	NA	hsa-miR-3133:309.00, hsa-miR-543:306.00, hsa-miR-181a-5p:305.00, hsa-miR-6507-5p:302.00, hsa-miR-340-5p:173.00	GTTAACAGAACCTTCTGGATATTTAACAGATGGCCCAATTAACTATAAATATAAAACTAAATGTACTTGGCTCATTGAAGGCTATCCAAATGCAGTGTTAAGATTAAGATTCAATCATTTTGCTACAGAATGTAGCTGGGATCATATGTATGTTTATGATGGAGATTCAATATATGCACCTTTAATAGCTGTACTTAGTGGTTTGATAGTCCCTGAAATAAGGGGCAATGAAACTGTGCCTGAAGTTGTTACTACATCTGGCTATGCACTGTTACATTTTTTTAGTGATGCTGCGTATAATCTAACTGGTTTCAACATTTTCTATTCAATCAATTCTTGTCCTAACAATTGCTCTGGTCATGGGAAGTGTACAACTAGTGTCTCTGTTCCAAGTCAAGT…
0	hsa_circ_0092765	chr10:116879948-116975638	-5186783248	0.016603491	ATRNL1	ENSG00000107518	hsa_circATRNL1_009	+	1239	ANNOTATED, CDS, coding, INTERNAL, OVCODE, OVEXON	1	NA	NA	hsa-miR-3133:309.00, hsa-miR-543:306.00, hsa-miR-181a-5p:305.00, hsa-miR-6507-5p:302.00, hsa-miR-340-5p:173.00	GTTAACAGAACCTTCTGGATATTTAACAGATGGCCCAATTAACTATAAATATAAAACTAAATGTACTTGGCTCATTGAAGGCTATCCAAATGCAGTGTTAAGATTAAGATTCAATCATTTTGCTACAGAATGTAGCTGGGATCATATGTATGTTTATGATGGAGATTCAATATATGCACCTTTAATAGCTGTACTTAGTGGTTTGATAGTCCCTGAAATAAGGGGCAATGAAACTGTGCCTGAAGTTGTTACTACATCTGGCTATGCACTGTTACATTTTTTTAGTGATGCTGCGTATAATCTAACTGGTTTCAACATTTTCTATTCAATCAATTCTTGTCCTAACAATTGCTCTGGTCATGGGAAGTGTACAACTAGTGTCTCTGTTCCAAGTCAAGT…
0	hsa_circ_0092796	chr10:117221450-117228839	-6497086241	0.000221386	ATRNL1	ENSG00000272811	hsa_circATRNL1_042	+	332	ANNOTATED, CDS, coding, INTERNAL, OVCODE, OVERLAPTX, OVEXON	0.0006302891	0.002135954	NA	hsa-miR-4742-3p:305.00, hsa-miR-625-3p:170.00, hsa-miR-382-5p:165.00, hsa-miR-628-5p:162.00, hsa-miR-5590-3p:161.00	ACAGCCTTTTGATTGATTATCAATTTACCTTCAGCTTATTACAGGAAGATGATCGCCACCATACTGCCATAAACTTTATAGCAAACCCAGAACAGTCGAACAAAAATCTGGATATATCAATTAATGCATCAAACAACTTTAATCTCAACATTACGTGGTCTGTCGGTTCAACAGCTGGAACAATATCTGGGGAAGAGACTTCTATAGTTTCCAAGAATAATATAAAGGAATACAGAGATAGTTTTTCCTATGAAAAATTTAACTTTAGAAGCAATCCTAACATTACATTCTATGTGTACGTCAGCAACTTTTCCTGGCCTATTAAAATACAG
0	hsa_circ_0020304	chr10:125780771-125806240	-4610596765	0.035904095	CHST15	ENSG00000182022	hsa_circCHST15_006	-	1859	ANNOTATED, CDS, coding, INTERNAL, OVCODE, OVERLAPTX, OVEXON, UTR5	0.99999951661555	NA	NA	hsa-miR-6730-5p:331.00, hsa-miR-6724-5p:319.00, hsa-miR-302c-3p:311.00, hsa-miR-541-3p:311.00, hsa-miR-432-3p:310.00	GAAATCTGGCATTTTTTAAAGTTTGCGCCCCACAAAGAGGAAATATTCCAAAGGTACTCAGGATGTAAAAGGGGAGATCTTCACAGATGCCTCCGTGGATGGCATGGCAATCCATCCATCAATGAGAAGACCATGATTTCTTTTAATTTTCTGTGTGTTTCCACATTCCCCAGTGAGAATTCTTCCACCTTTTTTTGTGCCATGGGAAAAACCTGAAGGGCAGGCAGAGCTGCTCCCGAACTTGTGACCTTCTCTGAGGTTGCAGCGGCTCTTGTAGAACATGACTCTGGGACATCACTTCCTTTTGTTTTCTTTCGGAGCTGAACCAAAGAATGTGCACCCTCTTTCTCTAGTGCTGTGGTGTCTGCTTATTTTTGTATTTGTGCTTTCCATCCATCT…
1563	hsa_circ_0000264	chr10:125798030-125806240	-4612760178	0.007018151	CHST15	ENSG00000182022	hsa_circCHST15_005	-	1702	ANNOTATED, CDS, coding, INTERNAL, OVCODE, OVEXON, UTR5	0.99998687736735	0.977049842	NA	hsa-miR-6730-5p:331.00, hsa-miR-6724-5p:319.00, hsa-miR-302c-3p:311.00, hsa-miR-541-3p:311.00, hsa-miR-432-3p:310.00	GAAATCTGGCATTTTTTAAAGTTTGCGCCCCACAAAGAGGAAATATTCCAAAGGTACTCAGGATGTAAAAGGGGAGATCTTCACAGATGCCTCCGTGGATGGCATGGCAATCCATCCATCAATGAGAAGACCATGATTTCTTTTAATTTTCTGTGTGTTTCCACATTCCCCAGTGAGAATTCTTCCACCTTTTTTTGTGCCATGGGAAAAACCTGAAGGGCAGGCAGAGCTGCTCCCGAACTTGTGACCTTCTCTGAGGTTGCAGCGGCTCTTGTAGAACATGACTCTGGGACATCACTTCCTTTTGTTTTCTTTCGGAGCTGAACCAAAGAATGTGCACCCTCTTTCTCTAGTGCTGTGGTGTCTGCTTATTTTTGTATTTGTGCTTTCCATCCATCT…
1563	hsa_circ_0000264	chr10:125798030-125806240	-4905578353	0.000698027	CHST15	ENSG00000182022	hsa_circCHST15_005	-	1702	ANNOTATED, CDS, coding, INTERNAL, OVCODE, OVEXON, UTR5	0.99998687736735	0.977049842	NA	hsa-miR-6730-5p:331.00, hsa-miR-6724-5p:319.00, hsa-miR-302c-3p:311.00, hsa-miR-541-3p:311.00, hsa-miR-432-3p:310.00	GAAATCTGGCATTTTTTAAAGTTTGCGCCCCACAAAGAGGAAATATTCCAAAGGTACTCAGGATGTAAAAGGGGAGATCTTCACAGATGCCTCCGTGGATGGCATGGCAATCCATCCATCAATGAGAAGACCATGATTTCTTTTAATTTTCTGTGTGTTTCCACATTCCCCAGTGAGAATTCTTCCACCTTTTTTTGTGCCATGGGAAAAACCTGAAGGGCAGGCAGAGCTGCTCCCGAACTTGTGACCTTCTCTGAGGTTGCAGCGGCTCTTGTAGAACATGACTCTGGGACATCACTTCCTTTTGTTTTCTTTCGGAGCTGAACCAAAGAATGTGCACCCTCTTTCTCTAGTGCTGTGGTGTCTGCTTATTTTTGTATTTGTGCTTTCCATCCATCT…
1563	hsa_circ_0000264	chr10:125798030-125806240	-5100948603	0.000315195	CHST15	ENSG00000182022	hsa_circCHST15_005	-	1702	ANNOTATED, CDS, coding, INTERNAL, OVCODE, OVEXON, UTR5	0.99998687736735	0.977049842	NA	hsa-miR-6730-5p:331.00, hsa-miR-6724-5p:319.00, hsa-miR-302c-3p:311.00, hsa-miR-541-3p:311.00, hsa-miR-432-3p:310.00	GAAATCTGGCATTTTTTAAAGTTTGCGCCCCACAAAGAGGAAATATTCCAAAGGTACTCAGGATGTAAAAGGGGAGATCTTCACAGATGCCTCCGTGGATGGCATGGCAATCCATCCATCAATGAGAAGACCATGATTTCTTTTAATTTTCTGTGTGTTTCCACATTCCCCAGTGAGAATTCTTCCACCTTTTTTTGTGCCATGGGAAAAACCTGAAGGGCAGGCAGAGCTGCTCCCGAACTTGTGACCTTCTCTGAGGTTGCAGCGGCTCTTGTAGAACATGACTCTGGGACATCACTTCCTTTTGTTTTCTTTCGGAGCTGAACCAAAGAATGTGCACCCTCTTTCTCTAGTGCTGTGGTGTCTGCTTATTTTTGTATTTGTGCTTTCCATCCATCT…
0.551	hsa_circ_0002109	chr10:13214375-13214765	-4129398844	0.018445839	MCM10	ENSG00000065328	hsa_circMCM10_003	+	246	ANNOTATED, CDS, coding, INTERNAL, OVCODE, OVEXON	0.989313572375079	NA	NA	hsa-miR-129-5p:166.00, hsa-miR-6865-5p:166.00, hsa-miR-378g:161.00, hsa-miR-3913-3p:160.00, hsa-miR-9-5p:159.00	AGGAATTAAGGAATTTGCAAGAGCAAATGAAGGCCTTACAAGAGCAGCTAAAAGTAACAACAATTAAACAGACAGCAAGCCCAGCCCGTCTGCAAAAATCCCCTGTAGAGAAGTCTCCCCGGCCACCTCTTAAGGAGAGGAGAGTTCAGAGAATTCAGGAGTCAACATGCTTTTCTGCGGAGCTTGATGTCCCTGCGCTACCAAGAACCAAGAGGGTGGCTCGAACACCAAAGGCTTCACCTCCAG
0	NA	chr10:15590453-15634303	-5112173951	0.012365801	ITGA8	ENSG00000077943	NA	NA	NA	NA	NA	NA	NA	NA	NA
0	hsa_circ_0093212	chr10:15614209-15628663	-541846922	0.007479878	ITGA8	ENSG00000077943	hsa_circITGA8_009	-	346	ANNOTATED, CDS, coding, INTERNAL, OVCODE, OVEXON	0.01041341	NA	NA	hsa-miR-6876-3p:177.00, hsa-miR-1253:171.00, hsa-miR-6833-5p:159.00, hsa-miR-7112-5p:159.00, hsa-miR-2355-3p:157.00, hsa-miR-6881-3p:157.00	TTCCAACAAGGACAATCCAGACAGCAATTTTGTGAGCCTGCAAATCAACATCACTGCTGTAGCGCAGGTGGAAATAAGAGGAGTGTCACACCCTCCGCAGATTGTTCTGCCCATTCATAACTGGGAACCAGAAGAGGAGCCCCACAAAGAGGAGGAGGTTGGACCATTGGTGGAACATATTTATGAGCTGCACAATATTGGACCAAGTACCATCAGTGACACCATCCTGGAGGTGGGCTGGCCTTTCTCTGCCCGGGATGAATTTCTTCTCTATATTTTCCATATTCAAACTCTGGGACCTCTGCAGTGCCAACCAAATCCTAATATCAATCCACAGGATATAAAG
0	hsa_circ_0093213	chr10:15617487-15634303	-6607534655	0.000207367	ITGA8	ENSG00000077943	hsa_circITGA8_006	-	267	ANNOTATED, CDS, coding, INTERNAL, OVCODE, OVERLAPTX, OVEXON	0.9976674	NA	NA	hsa-miR-6876-3p:177.00, hsa-miR-4648:166.00, hsa-miR-6847-3p:163.00, hsa-miR-494-5p:160.00, hsa-miR-2355-3p:157.00, hsa-miR-6881-3p:157.00	TATTCCCTGGGCCTCCGATTTGCAGTTCCACGTCTTGAGAAAACAAACATGAGCATTAACTTCGATCTCCAAATCAGAAGTTCCAACAAGGACAATCCAGACAGCAATTTTGTGAGCCTGCAAATCAACATCACTGCTGTAGCGCAGGTGGAAATAAGAGGAGTGTCACACCCTCCGCAGATTGTTCTGCCCATTCATAACTGGGAACCAGAAGAGGAGCCCCACAAAGAGGAGGAGGTTGGACCATTGGTGGAACATATTTATGAG
0	hsa_circ_0018168	chr10:34558584-34573173	-5920601084	0.007457415	PARD3	ENSG00000148498	hsa_circPARD3_036	-	354	ANNOTATED, CDS, coding, INTERNAL, OVCODE, OVEXON	0.999777723779254	0.175504861	chr8_127460273_127474615_+	hsa-miR-7111-3p:312.00, hsa-miR-125a-3p:169.00, hsa-miR-3677-3p:166.00, hsa-miR-5088-3p:165.00, hsa-miR-7151-5p:164.00	GTTTGGCAAACATCGAAAAGATGACAAGATTGAGAAAACGGGTAAAATAAAAATACAGGAATCCTTTACATCAGAAGAGGAGAGGATACGAATGAAGCAGGAGCAGGAGAGGATTCAAGCCAAAACTCGAGAATTTAGGGAACGACAAGCTCGAGAGCGTGACTATGCTGAAATTCAAGATTTTCATCGGACATTTGGCTGTGATGATGAGTTAATGTATGGGGGAGTTTCTTCTTATGAAGGTTCCATGGCTCTCAACGCTAGACCTCAGAGCCCACGAGAAGGGCATATGATGGATGCTTTGTATGCCCAAGTCAAGAAGCCGCGGAATTCCAAACCCTCACCTGTAGACAG
0	hsa_circ_0006743	chr10:65140077-65140242	-5644780865	0.001295997	JMJD1C	ENSG00000171988	hsa_circJMJD1C_011	-	165	ANNOTATED, CDS, coding, INTERNAL, OVCODE, OVEXON	0.0092541805665474	0.001602822	NA	hsa-miR-548c-3p:164.00, hsa-miR-664a-5p:160.00, hsa-miR-4677-5p:159.00, hsa-miR-4252:158.00, hsa-miR-670-5p:154.00	GTGTATGTGGAATTTGATGATCTTGAATGGGATAAACGAGAGTGGGTTAAAGTTTATGAAGATTTTTCAACTTTCTTGGTGGAATACCACTTAATCTGGGCCAAAAGGAATGACCCTAGCCAGACTCAGGGATCAAAGAGCAAACAGATTCAGTGGCCTGCATTG
0.551	hsa_circ_0017628	chr10:7262372-7327916	-390628051	0.033132718	SFMBT2	ENSG00000198879	hsa_circSFMBT2_026	-	894	ANNOTATED, CDS, coding, INTERNAL, OVCODE, OVEXON	0.999999999700972	0.977049842	NA	hsa-miR-4477a:171.00, hsa-miR-548bb-3p:169.00, hsa-miR-4722-5p:168.00, hsa-miR-548az-5p:165.00, hsa-miR-30b-3p:163.00	CAATCAAAGAGAAGTACACAGACTGGACAGAATTTCTCATACGTGACTTGACTGGTTCGAGGACAGCACCCGCCAACCTCCTGGAAGGTCCTCTGCGAGGGAAAGGCCCTATAGACCTCATTACAGTTGGTTCCTTAATAGAACTTCAGGATTCCCAGAACCCTTTTCAGTACTGGATAGTTAGTGTGATTGAAAATGTTGGAGGAAGATTACGCCTTCGCTATGTGGGATTGGAGGACACTGAATCCTATGACCAGTGGTTGTTTTACTTGGATTACAGACTTCGACCAGTTGGTTGGTGTCAAGAGAATAAATACAGAATGGACCCACCTTCAGAAATCTATCCTTTGAAGATGGCCTCTGAATGGAAATGTACTCTGGAAAAATCCCTTATTGATG…
4688	hsa_circ_0017636	chr10:7285519-7327916	-3088319769	0.029285779	SFMBT2	ENSG00000198879	hsa_circSFMBT2_023	-	684	ANNOTATED, CDS, coding, INTERNAL, OVCODE, OVEXON	0.999999448816281	0.138331767	NA	hsa-miR-4477a:171.00, hsa-miR-548bb-3p:169.00, hsa-miR-4722-5p:168.00, hsa-miR-548az-5p:165.00, hsa-miR-30b-3p:163.00	CAATCAAAGAGAAGTACACAGACTGGACAGAATTTCTCATACGTGACTTGACTGGTTCGAGGACAGCACCCGCCAACCTCCTGGAAGGTCCTCTGCGAGGGAAAGGCCCTATAGACCTCATTACAGTTGGTTCCTTAATAGAACTTCAGGATTCCCAGAACCCTTTTCAGTACTGGATAGTTAGTGTGATTGAAAATGTTGGAGGAAGATTACGCCTTCGCTATGTGGGATTGGAGGACACTGAATCCTATGACCAGTGGTTGTTTTACTTGGATTACAGACTTCGACCAGTTGGTTGGTGTCAAGAGAATAAATACAGAATGGACCCACCTTCAGAAATCTATCCTTTGAAGATGGCCTCTGAATGGAAATGTACTCTGGAAAAATCCCTTATTGATG…
4688	hsa_circ_0017636	chr10:7285519-7327916	-354921537	3.48e-05	SFMBT2	ENSG00000198879	hsa_circSFMBT2_023	-	684	ANNOTATED, CDS, coding, INTERNAL, OVCODE, OVEXON	0.999999448816281	0.138331767	NA	hsa-miR-4477a:171.00, hsa-miR-548bb-3p:169.00, hsa-miR-4722-5p:168.00, hsa-miR-548az-5p:165.00, hsa-miR-30b-3p:163.00	CAATCAAAGAGAAGTACACAGACTGGACAGAATTTCTCATACGTGACTTGACTGGTTCGAGGACAGCACCCGCCAACCTCCTGGAAGGTCCTCTGCGAGGGAAAGGCCCTATAGACCTCATTACAGTTGGTTCCTTAATAGAACTTCAGGATTCCCAGAACCCTTTTCAGTACTGGATAGTTAGTGTGATTGAAAATGTTGGAGGAAGATTACGCCTTCGCTATGTGGGATTGGAGGACACTGAATCCTATGACCAGTGGTTGTTTTACTTGGATTACAGACTTCGACCAGTTGGTTGGTGTCAAGAGAATAAATACAGAATGGACCCACCTTCAGAAATCTATCCTTTGAAGATGGCCTCTGAATGGAAATGTACTCTGGAAAAATCCCTTATTGATG…
4688	hsa_circ_0017636	chr10:7285519-7327916	-3172124859	0.006724566	SFMBT2	ENSG00000198879	hsa_circSFMBT2_023	-	684	ANNOTATED, CDS, coding, INTERNAL, OVCODE, OVEXON	0.999999448816281	0.138331767	NA	hsa-miR-4477a:171.00, hsa-miR-548bb-3p:169.00, hsa-miR-4722-5p:168.00, hsa-miR-548az-5p:165.00, hsa-miR-30b-3p:163.00	CAATCAAAGAGAAGTACACAGACTGGACAGAATTTCTCATACGTGACTTGACTGGTTCGAGGACAGCACCCGCCAACCTCCTGGAAGGTCCTCTGCGAGGGAAAGGCCCTATAGACCTCATTACAGTTGGTTCCTTAATAGAACTTCAGGATTCCCAGAACCCTTTTCAGTACTGGATAGTTAGTGTGATTGAAAATGTTGGAGGAAGATTACGCCTTCGCTATGTGGGATTGGAGGACACTGAATCCTATGACCAGTGGTTGTTTTACTTGGATTACAGACTTCGACCAGTTGGTTGGTGTCAAGAGAATAAATACAGAATGGACCCACCTTCAGAAATCTATCCTTTGAAGATGGCCTCTGAATGGAAATGTACTCTGGAAAAATCCCTTATTGATG…
67926	hsa_circ_0000211	chr10:7318853-7327916	-2322905568	1.71e-05	SFMBT2	ENSG00000198879	hsa_circSFMBT2_020	-	434	ANNOTATED, CDS, coding, INTERNAL	0.0363923602782416	0.096193658	NA	hsa-miR-4477a:171.00, hsa-miR-4477b:161.00, hsa-miR-103a-3p:158.00, hsa-miR-107:158.00, hsa-miR-4743-3p:158.00, hsa-miR-582-3p:158.00	CAATCAAAGAGAAGTACACAGACTGGACAGAATTTCTCATACGTGACTTGACTGGTTCGAGGACAGCACCCGCCAACCTCCTGGAAGGTCCTCTGCGAGGGAAAGGCCCTATAGACCTCATTACAGTTGGTTCCTTAATAGAACTTCAGGATTCCCAGAACCCTTTTCAGTACTGGATAGTTAGTGTGATTGAAAATGTTGGAGGAAGATTACGCCTTCGCTATGTGGGATTGGAGGACACTGAATCCTATGACCAGTGGTTGTTTTACTTGGATTACAGACTTCGACCAGTTGGTTGGTGTCAAGAGAATAAATACAGAATGGACCCACCTTCAGAAATCTATCCTTTGAAGATGGCCTCTGAATGGAAATGTACTCTGGAAAAATCCCTTATTGATG…
67926	hsa_circ_0000211	chr10:7318853-7327916	-1546579732	0.027733287	SFMBT2	ENSG00000198879	hsa_circSFMBT2_020	-	434	ANNOTATED, CDS, coding, INTERNAL	0.0363923602782416	0.096193658	NA	hsa-miR-4477a:171.00, hsa-miR-4477b:161.00, hsa-miR-103a-3p:158.00, hsa-miR-107:158.00, hsa-miR-4743-3p:158.00, hsa-miR-582-3p:158.00	CAATCAAAGAGAAGTACACAGACTGGACAGAATTTCTCATACGTGACTTGACTGGTTCGAGGACAGCACCCGCCAACCTCCTGGAAGGTCCTCTGCGAGGGAAAGGCCCTATAGACCTCATTACAGTTGGTTCCTTAATAGAACTTCAGGATTCCCAGAACCCTTTTCAGTACTGGATAGTTAGTGTGATTGAAAATGTTGGAGGAAGATTACGCCTTCGCTATGTGGGATTGGAGGACACTGAATCCTATGACCAGTGGTTGTTTTACTTGGATTACAGACTTCGACCAGTTGGTTGGTGTCAAGAGAATAAATACAGAATGGACCCACCTTCAGAAATCTATCCTTTGAAGATGGCCTCTGAATGGAAATGTACTCTGGAAAAATCCCTTATTGATG…
67926	hsa_circ_0000211	chr10:7318853-7327916	-1800580058	0.012233758	SFMBT2	ENSG00000198879	hsa_circSFMBT2_020	-	434	ANNOTATED, CDS, coding, INTERNAL	0.0363923602782416	0.096193658	NA	hsa-miR-4477a:171.00, hsa-miR-4477b:161.00, hsa-miR-103a-3p:158.00, hsa-miR-107:158.00, hsa-miR-4743-3p:158.00, hsa-miR-582-3p:158.00	CAATCAAAGAGAAGTACACAGACTGGACAGAATTTCTCATACGTGACTTGACTGGTTCGAGGACAGCACCCGCCAACCTCCTGGAAGGTCCTCTGCGAGGGAAAGGCCCTATAGACCTCATTACAGTTGGTTCCTTAATAGAACTTCAGGATTCCCAGAACCCTTTTCAGTACTGGATAGTTAGTGTGATTGAAAATGTTGGAGGAAGATTACGCCTTCGCTATGTGGGATTGGAGGACACTGAATCCTATGACCAGTGGTTGTTTTACTTGGATTACAGACTTCGACCAGTTGGTTGGTGTCAAGAGAATAAATACAGAATGGACCCACCTTCAGAAATCTATCCTTTGAAGATGGCCTCTGAATGGAAATGTACTCTGGAAAAATCCCTTATTGATG…
0	hsa_circ_0017641	chr10:7318853-7423911	-5791682915	0.000300029	SFMBT2	ENSG00000198879	hsa_circSFMBT2_008	-	921	ANNOTATED, CDS, coding, INTERNAL, OVCODE, OVERLAPTX, OVEXON, UTR5	0.996348888789662	NA	NA	hsa-miR-4691-5p:317.00, hsa-miR-302d-3p:178.00, hsa-miR-4477a:171.00, hsa-miR-302a-3p:170.00, hsa-miR-302b-3p:170.00, hsa-miR-302c-3p:170.00	GTAATTTTTTCTGCAGGATGAATTAAGAGAAGAGACACTTGCTCATCAGGCATGGAGAGCACTTTGTCAGCTTCCAATATGCAAGACCCTTCATCTTCACCCTTGGAAAAGTGTCTCGGCTCAGCTAATGGAAATGGAGACCTTGATTCTGAAGAAGGCTCAAGCTTGGAGGAAACTGGCTTTAACTGGGGAGAATATTTGGAAGAGACAGGAGCAAGTGCTGCTCCCCACACATCATTCAAACACGTTGAAATCAGCATTCAGAGCAACTTCCAGCCAGGAATGAAATTGGAAGTGGCTAATAAGAACAACCCGGACACGTACTGGGTGGCCACGATCATTACCACGTGCGGGCAGCTGCTGCTTCTGCGCTACTGCGGTTACGGGGAGGACCGCAGG…
1177	hsa_circ_0017648	chr10:7409610-7423911	-6167023437	6.59e-05	SFMBT2	ENSG00000198879	hsa_circSFMBT2_004	-	487	ANNOTATED, CDS, coding, INTERNAL, OVCODE, OVERLAPTX, OVEXON, UTR5	0.830893450783844	NA	NA	hsa-miR-302d-3p:178.00, hsa-miR-302a-3p:170.00, hsa-miR-302b-3p:170.00, hsa-miR-302c-3p:170.00, hsa-miR-93-5p:169.00	GTAATTTTTTCTGCAGGATGAATTAAGAGAAGAGACACTTGCTCATCAGGCATGGAGAGCACTTTGTCAGCTTCCAATATGCAAGACCCTTCATCTTCACCCTTGGAAAAGTGTCTCGGCTCAGCTAATGGAAATGGAGACCTTGATTCTGAAGAAGGCTCAAGCTTGGAGGAAACTGGCTTTAACTGGGGAGAATATTTGGAAGAGACAGGAGCAAGTGCTGCTCCCCACACATCATTCAAACACGTTGAAATCAGCATTCAGAGCAACTTCCAGCCAGGAATGAAATTGGAAGTGGCTAATAAGAACAACCCGGACACGTACTGGGTGGCCACGATCATTACCACGTGCGGGCAGCTGCTGCTTCTGCGCTACTGCGGTTACGGGGAGGACCGCAGG…
0	hsa_circ_0017649	chr10:7412242-7423911	-5141539659	0.002300216	SFMBT2	ENSG00000198879	hsa_circSFMBT2_003	-	246	ANNOTATED, CDS, coding, INTERNAL, OVCODE, OVERLAPTX, OVEXON, UTR5	0.136507457729166	NA	NA	hsa-miR-302d-3p:178.00, hsa-miR-302a-3p:170.00, hsa-miR-302b-3p:170.00, hsa-miR-302c-3p:170.00, hsa-miR-93-5p:169.00	GTAATTTTTTCTGCAGGATGAATTAAGAGAAGAGACACTTGCTCATCAGGCATGGAGAGCACTTTGTCAGCTTCCAATATGCAAGACCCTTCATCTTCACCCTTGGAAAAGTGTCTCGGCTCAGCTAATGGAAATGGAGACCTTGATTCTGAAGAAGGCTCAAGCTTGGAGGAAACTGGCTTTAACTGGGGAGAATATTTGGAAGAGACAGGAGCAAGTGCTGCTCCCCACACATCATTCAAACAC
0	NA	chr10:98078108-98082485	-5150534796	0.001870695	DNTT	ENSG00000107447	NA	NA	NA	NA	NA	NA	NA	NA	NA
0	NA	chr10:98078108-98082485	-5068339106	0.004003969	DNTT	ENSG00000107447	NA	NA	NA	NA	NA	NA	NA	NA	NA
41861	hsa_circ_0000284	chr11:33307958-33309057	-281332118	1.12e-10	HIPK3	ENSG00000110422	hsa_circHIPK3_004	+	1099	ANNOTATED, CDS, coding, INTERNAL, OVCODE, OVEXON, UTR5	0.999681918339332	0.740531685	NA	hsa-miR-8087:463.00, hsa-miR-30d-3p:320.00, hsa-miR-6500-3p:317.00, hsa-miR-7107-3p:306.00, hsa-miR-150-3p:302.00, hsa-miR-30e-3p:302.00	GTATGGCCTCACAAGTCTTGGTCTACCCACCATATGTTTATCAAACTCAGTCAAGTGCCTTTTGTAGTGTGAAGAAACTCAAAGTAGAGCCAAGCAGTTGTGTATTCCAGGAAAGAAACTATCCACGGACCTATGTGAATGGTAGAAACTTTGGAAATTCTCATCCTCCCACTAAGGGTAGTGCTTTTCAGACAAAGATACCATTTAATAGACCTCGAGGACACAACTTTTCATTGCAGACAAGTGCTGTTGTTTTGAAAAACACTGCAGGTGCTACAAAGGTCATAGCAGCTCAGGCACAGCAAGCTCACGTGCAGGCACCTCAGATTGGGGCGTGGCGAAACAGATTGCATTTCCTAGAAGGCCCCCAGCGATGTGGATTGAAGCGCAAGAGTGAGG…
0	hsa_circ_0006988	chr11:36248634-36248980	-5022540526	0.012782925	LDLRAD3	ENSG00000179241	hsa_circLDLRAD3_007	+	346	ANNOTATED, CDS, coding, INTERNAL, OVCODE, OVEXON	0.942925806155537	0.000356627	NA	hsa-miR-6836-5p:305.00, hsa-miR-138-5p:167.00, hsa-miR-597-3p:165.00, hsa-miR-3937:164.00, hsa-miR-1243:163.00, hsa-miR-608:163.00, hsa-miR-6842-5p:163.00	AACCCGGCAGTGGGCAGGTGTTTGTGACTTCAGAGAACCAACTTGTGTATTACCCCAGCATCACCTATGCCATCATCGGCAGCTCCGTCATTTTTGTGCTGGTGGTGGCCCTGCTGGCACTGGTCTTGCACCACCAGCGGAAGCGGAACAACCTCATGACGCTGCCCGTGCACCGGCTGCAGCACCCTGTGCTGCTGTCCCGCCTGGTGGTCCTGGACCACCCCCACCACTGCAACGTCACCTACAACGTCAATAATGGCATCCAGTATGTGGCCAGCCAGGCGGAGCAGAATGCGTCGGAAGTAGGCTCCCCACCCTCCTACTCCGAGGCCTTGCTGGACCAGAG
0	hsa_circ_0006988	chr11:36248634-36248980	-6391690314	0.001419351	LDLRAD3	ENSG00000179241	hsa_circLDLRAD3_007	+	346	ANNOTATED, CDS, coding, INTERNAL, OVCODE, OVEXON	0.942925806155537	0.000356627	NA	hsa-miR-6836-5p:305.00, hsa-miR-138-5p:167.00, hsa-miR-597-3p:165.00, hsa-miR-3937:164.00, hsa-miR-1243:163.00, hsa-miR-608:163.00, hsa-miR-6842-5p:163.00	AACCCGGCAGTGGGCAGGTGTTTGTGACTTCAGAGAACCAACTTGTGTATTACCCCAGCATCACCTATGCCATCATCGGCAGCTCCGTCATTTTTGTGCTGGTGGTGGCCCTGCTGGCACTGGTCTTGCACCACCAGCGGAAGCGGAACAACCTCATGACGCTGCCCGTGCACCGGCTGCAGCACCCTGTGCTGCTGTCCCGCCTGGTGGTCCTGGACCACCCCCACCACTGCAACGTCACCTACAACGTCAATAATGGCATCCAGTATGTGGCCAGCCAGGCGGAGCAGAATGCGTCGGAAGTAGGCTCCCCACCCTCCTACTCCGAGGCCTTGCTGGACCAGAG
1177	hsa_circ_0007294	chr12:100166699-100175875	-9349929466	0.006724566	ANKS1B	ENSG00000185046	hsa_circANKS1B_022	-	459	ANNOTATED, CDS, coding, INTERNAL, OVCODE, OVEXON	0.00354723146117159	0.003200513	NA	hsa-miR-7703:307.00, hsa-miR-141-5p:169.00, hsa-miR-3616-5p:165.00, hsa-miR-4747-5p:165.00, hsa-miR-146a-3p:161.00, hsa-miR-4684-3p:161.00	ACAGAAAAGGGGAGTGCACTTCATGAAGCAGCTTTGTTTGGAAAGGTGGATGTTGTACGAGTTCTGTTAGAAACAGGAATTGATGCCAACATAAAGGATAGCTTAGGTAGAACTGTCTTGGACATTCTGAAAGAACATCCATCTCAGAAATCTCTCCAGATTGCAACACTCTTACAAGAGTATTTAGAAGGCGTGGGAAGATCTACAGTCCTCGAAGAGCCTGTACAGGAAGATGCAACACAAGAAACACACATTTCATCTCCTGTTGAGTCTCCTTCCCAAAAGACCAAAAGTGAAACCGTCACTGGAGAATTATCAAAACTCTTGGATGAAATAAAACTCTGTCAAGAAAAGGATTATTCGTTTGAAGACTTGTGCCACACAATATCAGACCACTAC…
0	hsa_circ_0096922	chr12:100166699-100219167	-4818541715	0.044865379	ANKS1B	ENSG00000185046	hsa_circANKS1B_011	-	994	ANNOTATED, CDS, coding, INTERNAL, OVCODE, OVEXON	0.9996357	NA	NA	hsa-miR-3912-5p:314.00, hsa-miR-627-3p:311.00, hsa-miR-7703:307.00, hsa-miR-153-5p:302.00, hsa-miR-141-5p:169.00	CATCTGGCGAGGCCCCAATGTGAACTGCACAGACAGTTCGGGTTACACTGCTTTACACCACGCAGCCTTAAATGGACATAAGGACATAGTTCTCAAACTACTTCAGTATGAGGCATCAACAAATGTAGCAGACAACAAAGGGTATTTTCCTATTCACCTGGCTGCCTGGAAAGGAGATGTGGAAATTGTGAAGATTCTTATTCATCATGGACCATCACATTCCAGGGTCAATGAACAGAACAATGAAAATGAAACTGCCCTACACTGTGCAGCTCAATATGGACACTCAGAAGTAGTTGCTGTTCTCCTAGAAGAGCTCACTGACCCGACAATTAGAAATAGCAAGCTGGAAACACCTTTGGACTTGGCGGCACTCTACGGACGGCTTAGAGTGGTAAA…
2756	hsa_circ_0000373	chr12:1136913-1137738	-3095629996	0.023700664	ERC1	ENSG00000082805	hsa_circERC1_003	+	825	ANNOTATED, CDS, coding, INTERNAL, ncRNA, OVCODE, OVEXON, UTR5	0.987916531870315	0.581824788	NA	hsa-miR-6079:312.00, hsa-miR-493-3p:308.00, hsa-miR-6851-5p:304.00, hsa-miR-1249-5p:169.00, hsa-miR-6865-5p:169.00	ATATGGTGTAAGATACTTCTTCAAGATTGGACAGCTGGGGACCTTCTTCTGATTAACCTTAAACCAACTTGTAGCCATAGAGACACCTCACAAGGTTCCCATTTTTGTTGTTGTTGTTGTTGATTTTCTGCTCACACCTTTCCTGACCTTGCAACCATGTATGGAAGTGCCCGCTCTGTTGGGAAGGTGGAGCCGAGCAGCCAGAGCCCTGGGCGTTCACCCAGGCTTCCACGTTCCCCTCGCTTGGGTCACCGTCGAACCAACAGTACGGGAGGGAGTTCGGGAAGCAGTGTTGGAGGTGGCAGTGGGAAAACCCTTTCAATGGAAAATATACAATCTTTAAATGCTGCCTATGCCACCTCTGGCCCTATGTATCTAAGTGACCATGAAAATGTGGGT…
2756	hsa_circ_0000373	chr12:1136913-1137738	-2818383919	0.030830139	ERC1	ENSG00000082805	hsa_circERC1_003	+	825	ANNOTATED, CDS, coding, INTERNAL, ncRNA, OVCODE, OVEXON, UTR5	0.987916531870315	0.581824788	NA	hsa-miR-6079:312.00, hsa-miR-493-3p:308.00, hsa-miR-6851-5p:304.00, hsa-miR-1249-5p:169.00, hsa-miR-6865-5p:169.00	ATATGGTGTAAGATACTTCTTCAAGATTGGACAGCTGGGGACCTTCTTCTGATTAACCTTAAACCAACTTGTAGCCATAGAGACACCTCACAAGGTTCCCATTTTTGTTGTTGTTGTTGTTGATTTTCTGCTCACACCTTTCCTGACCTTGCAACCATGTATGGAAGTGCCCGCTCTGTTGGGAAGGTGGAGCCGAGCAGCCAGAGCCCTGGGCGTTCACCCAGGCTTCCACGTTCCCCTCGCTTGGGTCACCGTCGAACCAACAGTACGGGAGGGAGTTCGGGAAGCAGTGTTGGAGGTGGCAGTGGGAAAACCCTTTCAATGGAAAATATACAATCTTTAAATGCTGCCTATGCCACCTCTGGCCCTATGTATCTAAGTGACCATGAAAATGTGGGT…
2756	hsa_circ_0000373	chr12:1136913-1137738	-241387755	0.03659737	ERC1	ENSG00000082805	hsa_circERC1_003	+	825	ANNOTATED, CDS, coding, INTERNAL, ncRNA, OVCODE, OVEXON, UTR5	0.987916531870315	0.581824788	NA	hsa-miR-6079:312.00, hsa-miR-493-3p:308.00, hsa-miR-6851-5p:304.00, hsa-miR-1249-5p:169.00, hsa-miR-6865-5p:169.00	ATATGGTGTAAGATACTTCTTCAAGATTGGACAGCTGGGGACCTTCTTCTGATTAACCTTAAACCAACTTGTAGCCATAGAGACACCTCACAAGGTTCCCATTTTTGTTGTTGTTGTTGTTGATTTTCTGCTCACACCTTTCCTGACCTTGCAACCATGTATGGAAGTGCCCGCTCTGTTGGGAAGGTGGAGCCGAGCAGCCAGAGCCCTGGGCGTTCACCCAGGCTTCCACGTTCCCCTCGCTTGGGTCACCGTCGAACCAACAGTACGGGAGGGAGTTCGGGAAGCAGTGTTGGAGGTGGCAGTGGGAAAACCCTTTCAATGGAAAATATACAATCTTTAAATGCTGCCTATGCCACCTCTGGCCCTATGTATCTAAGTGACCATGAAAATGTGGGT…
21292	hsa_circ_0000441	chr12:116534473-116549317	-2729368891	6.57e-05	MED13L	ENSG00000123066	hsa_circMED13L_026	-	169	ANNOTATED, CDS, coding, INTERNAL, OVCODE, OVEXON	0.0562759033993622	0.002135954	NA	hsa-miR-6768-3p:160.00, hsa-miR-4709-3p:159.00, hsa-miR-135b-5p:156.00, hsa-miR-1248:154.00, hsa-miR-135a-5p:152.00, hsa-miR-4752:152.00, hsa-miR-501-5p:152.00	TTGTGGAAGAAGGACTCTGGGAAAATGGCCTTTCCTATGAATGTAGGACGCTGCTCTTCAAAGCGATCCACAATCTGTTAGAAAGGTGCCTAATGGATAAGAACTTCGTTAGGATTGGGAAATGGTTTGTCCGACCCTACGAAAAGGATGAAAAGCCAGTCAACAAAAG
0.551	hsa_circ_0000378	chr12:12397195-12397589	-4690171756	0.010299899	LRP6	ENSG00000070018	hsa_circLRP6_002	-	394	ANNOTATED, CDS, coding, INTERNAL, OVCODE, OVEXON	0.0234772055361385	0.988391715	NA	hsa-miR-4691-5p:173.00, hsa-miR-1202:165.00, hsa-miR-6792-3p:160.00, hsa-miR-499b-3p:159.00, hsa-miR-1179:157.00	CGGCCCCTTTGTTGCTTTATGCAAACAGACGGGACTTGCGATTGGTTGATGCTACAAATGGCAAAGAGAATGCTACGATTGTAGTTGGAGGCTTGGAGGATGCAGCTGCGGTGGACTTTGTGTTTAGTCATGGCTTGATATACTGGAGTGATGTCAGCGAAGAAGCCATTAAACGAACAGAATTTAACAAAACTGAGAGTGTGCAGAATGTTGTTGTTTCTGGATTATTGTCCCCCGATGGGCTGGCATGTGATTGGCTTGGAGAAAAATTGTACTGGACAGATTCTGAAACTAATCGGATTGAAGTTTCTAATTTAGATGGATCTTTACGAAAAGTTTTATTTTGGCAAGAGTTGGATCAACCCAGAGCTATTGCCTTAGATCCTTCAAGTGG
0.551	hsa_circ_0000378	chr12:12397195-12397589	-4157284347	0.0136288	LRP6	ENSG00000070018	hsa_circLRP6_002	-	394	ANNOTATED, CDS, coding, INTERNAL, OVCODE, OVEXON	0.0234772055361385	0.988391715	NA	hsa-miR-4691-5p:173.00, hsa-miR-1202:165.00, hsa-miR-6792-3p:160.00, hsa-miR-499b-3p:159.00, hsa-miR-1179:157.00	CGGCCCCTTTGTTGCTTTATGCAAACAGACGGGACTTGCGATTGGTTGATGCTACAAATGGCAAAGAGAATGCTACGATTGTAGTTGGAGGCTTGGAGGATGCAGCTGCGGTGGACTTTGTGTTTAGTCATGGCTTGATATACTGGAGTGATGTCAGCGAAGAAGCCATTAAACGAACAGAATTTAACAAAACTGAGAGTGTGCAGAATGTTGTTGTTTCTGGATTATTGTCCCCCGATGGGCTGGCATGTGATTGGCTTGGAGAAAAATTGTACTGGACAGATTCTGAAACTAATCGGATTGAAGTTTCTAATTTAGATGGATCTTTACGAAAAGTTTTATTTTGGCAAGAGTTGGATCAACCCAGAGCTATTGCCTTAGATCCTTCAAGTGG
0	hsa_circ_0002071	chr12:133383762-133398897	-454110329	0.045051775	GOLGA3	ENSG00000090615	hsa_circGOLGA3_004	-	1473	ANNOTATED, CDS, coding, INTERNAL, OVCODE, OVEXON, UTR5	0.999991604111398	NA	NA	hsa-miR-370-3p:326.00, hsa-miR-4654:319.00, hsa-miR-3184-5p:313.00, hsa-miR-6842-5p:309.00, hsa-miR-6724-5p:308.00	GTATCATGATATTAGCTGGTTTGACATCAAGTCATTTGTGAGTCATCAGATCTTCTCCTGAAAATGGGAGACACAGTAGGGCCCCTCCCAGGAGCTCTTGGCTGTTGCTGATGGCAGAAGCCAAGCTTGTCCAAGGTTCACTTGTAGCCCCTCAGCGTCAGCTCAGCTGGTGTCGTCCTGACCATGGACGGCGCGTCGGCCGAGCAAGATGGCCTCCAGGAGGACAGATCCCACAGTGGCCCCTCGTCTCTCCCCGAGGCCCCACTGAAGCCCCCGGGCCCACTGGTGCCACCTGACCAGCAGGACAAAGTCCAGTGTGCCGAGGTAAACAGAGCATCCACGGAAGGGGAAAGCCCGGATGGACCTGGCCAGGGAGGCCTCTGTCAGAACGGGCCAACG…
2189	hsa_circ_0000381	chr12:25214525-25222365	-5322501576	0.000207367	LRMP	ENSG00000118308	hsa_circLRMP_003	+	1636	ALT_ACCEPTOR, CDS, coding, INTERNAL, intronic, UTR5	0.00323885187978273	NA	NA	hsa-miR-5197-3p:327.00, hsa-miR-6792-3p:318.00, hsa-miR-561-5p:314.00, hsa-miR-1252-5p:311.00, hsa-miR-4796-3p:311.00	CAACAATTGAGTCACTTCAAAAGGAGTTCATTGAAGGGGAACACCATGGCTTGCTGTTTCAGGTAAAATATCTCTGATATGTGTTCAGTTACTGTGGAGGAAGTTGTTCAATTCATGTAAGGTTTTGAAGCTAATTTATAACAGACAATGACTTTAATCATTAAATTAAATAACCAGTTTAGAAGAAAATGTTTTGGTGGACTTTGTTCTCTTCTGCACTTAAAGTATTTAGCAAAATAAGAAAGGAGATCTTACATTAGTGAGTGGCTACTGATAATATCTTCTAGAGAGGAAGCATTTCAGAATTTTCTTTGCCCCACCACTATATCTATTAGCGAACAGCCAGTTTTTCAGTCTTGGGGACCTCCTTTCTGATAGTAAGGGCATATCATTCAATTT…
3.2	hsa_circ_0025630	chr12:25216653-25222365	-3991620506	0.003639826	LRMP	ENSG00000118308	hsa_circLRMP_004	+	327	ANNOTATED, CDS, coding, INTERNAL, OVCODE, OVEXON, UTR5	0.933002951960478	NA	NA	hsa-miR-6790-5p:164.00, hsa-miR-4731-5p:162.00, hsa-miR-567:161.00, hsa-miR-762:161.00, hsa-miR-3682-5p:160.00	AAGCAGTGTTGCCACAAACTATATGGTGGTCAAGAAGCAAGAATACATCAGACACCCCTGACCTTGAAACATACGTGCTGGTACACACCTCTGCTGGATGCCTTATCTCTGGATAGTTTTACAGCAGTTCCAACCCTGGAATCAACACCTTTCTCAGGTGTAGCCAACCAAATCCACACTCTGTGTGAAAGGCCCACATATGGAGAAGTAAAGGATGGTGCTTTGGATGTAAAAAGACAACACAAGTGCCCAGGCCCCACAAGTGGCCCCAGCCCAGGAACGAATCTCTCAGGCTGCATCAGGATGAATGATGACCCAAGTATGGAA
23549	hsa_circ_0025633	chr12:25232177-25236427	-2000732319	0.004801766	LRMP	ENSG00000118308	hsa_circLRMP_007	+	291	ANNOTATED, CDS, coding, INTERNAL, OVCODE, OVEXON	0.986381876821071	NA	chr6_145147635_145149357_+	hsa-miR-378b:300.00, hsa-miR-921:167.00, hsa-miR-513b-5p:162.00, hsa-miR-16-2-3p:161.00, hsa-miR-195-3p:161.00	GAGAATGGTGTTGAACGCGTGTGTCCTGAGAGCCTGCTGCAGTCCAGGGAATATTCCTCACTACCATTACCCAGACACACTTCATCGACAGACGGTACTATAACTTCAAGTGATCCTGGATTAGAAATTCTGAATATGGCTTCTTGTGACCTTGACAGAAACTCGCTCTGTAAGAAAGAGGAGGATACAAGATCAGCTTCTCCCACGATAGAGGCCCAAGGCACAAGTCCAGCTCATGATAATATTGCATTCCAAGACTCTACGAGTAAGGATAAAACCATATTAAATCTG
4082	NA	chr12:25232177-25243131	-3533464396	0.004515644	LRMP	ENSG00000118308	NA	NA	NA	NA	NA	NA	NA	NA	NA
0	hsa_circ_0002881	chr12:459786-463400	-5177698621	0.008234939	KDM5A	ENSG00000073614	hsa_circKDM5A_013	-	438	ANNOTATED, CDS, coding, INTERNAL, OVCODE, OVEXON	0.999985526341219	NA	chr6_120388009_120389711_+	hsa-miR-377-3p:180.00, hsa-miR-4727-5p:166.00, hsa-miR-4720-5p:165.00, hsa-miR-1197:162.00, hsa-miR-8076:162.00	GTTGATCTCTATGTTTGTATGTTTTGTGGTCGGGGAAACAATGAAGATAAATTGCTTTTGTGTGATGGATGTGATGACAGCTATCATACATTTTGTCTAATTCCTCCACTACCTGATGTGCCCAAAGGAGACTGGAGGTGTCCTAAATGTGTCGCCGAGGAATGTAGCAAACCTCGAGAAGCCTTTGGATTTGAACAAGCTGTACGAGAGTATACACTTCAGAGCTTTGGAGAGATGGCAGATAATTTTAAGTCTGATTATTTTAATATGCCAGTCCATATGGTTCCCACAGAACTAGTAGAAAAGGAATTTTGGCGGCTGGTAAGCAGCATTGAAGAAGATGTTATTGTGGAATATGGAGCAGATATCTCCTCAAAAGACTTTGGAAGTGGATTTCCG…
1012	hsa_circ_0004448	chr12:69214104-69218431	-4182656006	0.017447582	MDM2	ENSG00000135679	hsa_circMDM2_005	+	215	ANNOTATED, CDS, coding, INTERNAL, OVCODE, OVEXON	0.0396620123061937	0.002135954	NA	hsa-miR-4777-5p:162.00, hsa-miR-4753-3p:159.00, hsa-let-7e-5p:158.00, hsa-miR-3074-5p:158.00, hsa-miR-3927-3p:156.00, hsa-miR-4458:156.00, hsa-miR-532-3p:156.00, hsa-miR-5694:156.00	GAAAATATATACCATGATCTACAGGAACTTGGTAGTAGTCAATCAGCAGGAATCATCGGACTCAGGTACATCTGTGAGTGAGAACAGGTGTCACCTTGAAGGTGGGAGTGATCAAAAGGACCTTGTACAAGAGCTTCAGGAAGAGAAACCTTCATCTTCACATTTGGTTTCTAGACCATCTACCTCATCTAGAAGGAGAGCAATTAGTGAGACAG
0	hsa_circ_0099501	chr12:93938846-93960935	-4119156117	0.039012884	SOCS2-AS1	ENSG00000246985	hsa_circSOCS2-AS1_002	-	611	ANNOTATED, INTERNAL, ncRNA, OVEXON	0.2287569	NA	NA	hsa-miR-6809-3p:305.00, hsa-miR-1343-3p:175.00, hsa-miR-6787-3p:170.00, hsa-miR-4736:168.00, hsa-miR-6867-3p:167.00	AGTTTGCCATCTCCGTACCACCACCACCACCACACACAGCACCCTCAAGACTCCCTGTGATCCTGGGATGCACTCAACGAAGAGTGTGTGGCCCAGGATTTGATGGAAATGCTACAAGAGAAGCAGGCTCTCCCCTTCTGAAATGATGAGTGATAATGACCATACAGGTCAACTTTTCCACCACTTGGAGGGAGCCTGTCAAAGAACAAAGGCAACAGAGAAGAGAGCAGAGCTGAGGTTGGGTGAGAGGGAGAAATTCCTGAGTGCTTGAATCCCACATGCCGGAAGCCGCACCACACTTGGACTTCTCAATACAGGAGCCACTGAGAAACCAAGTCATGCTGAAGACCTGGAAATCCCAGCAGGCTGCAAACCAGCTGCAACTACAATGGGTCAGCC…
0	hsa_circ_0002680	chr13:111857635-111896641	-4575839709	0.042123184	ARHGEF7	ENSG00000102606	hsa_circARHGEF7_008	+	698	ANNOTATED, CDS, coding, INTERNAL, OVCODE, OVEXON	0.976432269824926	NA	chr8_11781154_11800868_+	hsa-miR-7161-5p:479.00, hsa-miR-548u:307.00, hsa-miR-4527:303.00, hsa-miR-3922-3p:167.00, hsa-miR-2110:165.00, hsa-miR-99a-3p:165.00	ACGTTTGATGCAAATGATTTGTATCAGGGGCAGAATTTTAACAAGGTCCTCAGTTCCTTAGTGACTCTAAATAAAGTAACAGCAGACATCGGGCTGGGGAGTGACTCCGTGTGTGCCCGGCCCTCGTCTCACCGCATAAAGTCTTTTGACTCCCTTGGATCACAGTCTTTGCACACTCGGACTTCAAAACTGTTCCAGGGCCAGTATCGGAGTTTGGACATGACCGATAATAGCAACAATCAACTGGTAGTAAGAGCAAAGTTTAACTTCCAGCAGACCAATGAGGACGAGCTTTCCTTCTCAAAAGGAGACGTCATCCATGTCACCCGTGTGGAAGAGGGAGGCTGGTGGGAGGGCACACTCAACGGCCGGACCGGCTGGTTCCCCAGCAACTACGTG…
0.551	hsa_circ_0000467	chr13:21742126-21742538	-4824728683	0.009002785	SKA3	ENSG00000165480	hsa_circSKA3_005	-	412	ANNOTATED, CDS, coding, INTERNAL	0.684552647934995	0.14620556	NA	hsa-miR-6515-5p:169.00, hsa-miR-520g-3p:165.00, hsa-miR-135a-5p:164.00, hsa-miR-549a:161.00, hsa-miR-1324:159.00, hsa-miR-4653-3p:159.00, hsa-miR-520h:159.00	TACACGAGCAAGAAGCCATTAACTCTGACCCAGAGTTGTCTAATTGTGAAAATTTTCAGAAGACTGATGTGAAAGATGATCTGTCTGATCCTCCTGTTGCAAGCAGTTGTATTTCTGAGAAGTCTCCACGTAGTCCACAACTTTCAGATTTTGGACTTGAGCGGTACATCGTATCCCAAGTTCTACCAAACCCTCCACAGGCAGTGAACAACTATAAGGAAGAGCCCGTAATTGTAACCCCACCTACCAAACAATCACTAGTAAAAGTACTAAAAACTCCAAAATGTGCACTAAAAATGGATGATTTTGAGTGTGTAACTCCTAAATTAGAACACTTTGGTATCTCTGAATATACTATGTGTTTAAATGAAGATTACACAATGGGACTTAAAAATGCGA…
0	hsa_circ_0100160	chr13:28588588-28589838	-6465217689	2.1e-05	FLT3	ENSG00000122025	hsa_circFLT3_015	-	318	ANNOTATED, CDS, coding, INTERNAL, OVCODE, OVEXON	0.9932719	NA	NA	hsa-miR-4659b-3p:306.00, hsa-miR-6508-3p:165.00, hsa-miR-3182:163.00, hsa-miR-4528:160.00, hsa-miR-4727-5p:159.00, hsa-miR-4747-5p:159.00, hsa-miR-544a:159.00	GCCCGTCTGCCTGTAAAATGGATGGCCCCCGAAAGCCTGTTTGAAGGCATCTACACCATTAAGAGTGATGTCTGGTCATATGGAATATTACTGTGGGAAATCTTCTCACTTGGTGTGAATCCTTACCCTGGCATTCCGGTTGATGCTAACTTCTACAAACTGATTCAAAATGGATTTAAAATGGATCAGCCATTTTATGCTACAGAAGAAATATACATTATAATGCAATCCTGCTGGGCTTTTGACTCAAGGAAACGGCCATCCTTCCCTAATTTGACTTCGTTTTTAGGATGTCAGCTGGCAGATGCAGAAGAAGCG
0	hsa_circ_0100160	chr13:28588588-28589838	-6911846702	1.56e-05	FLT3	ENSG00000122025	hsa_circFLT3_015	-	318	ANNOTATED, CDS, coding, INTERNAL, OVCODE, OVEXON	0.9932719	NA	NA	hsa-miR-4659b-3p:306.00, hsa-miR-6508-3p:165.00, hsa-miR-3182:163.00, hsa-miR-4528:160.00, hsa-miR-4727-5p:159.00, hsa-miR-4747-5p:159.00, hsa-miR-544a:159.00	GCCCGTCTGCCTGTAAAATGGATGGCCCCCGAAAGCCTGTTTGAAGGCATCTACACCATTAAGAGTGATGTCTGGTCATATGGAATATTACTGTGGGAAATCTTCTCACTTGGTGTGAATCCTTACCCTGGCATTCCGGTTGATGCTAACTTCTACAAACTGATTCAAAATGGATTTAAAATGGATCAGCCATTTTATGCTACAGAAGAAATATACATTATAATGCAATCCTGCTGGGCTTTTGACTCAAGGAAACGGCCATCCTTCCCTAATTTGACTTCGTTTTTAGGATGTCAGCTGGCAGATGCAGAAGAAGCG
0	hsa_circ_0100160	chr13:28588588-28589838	-4938512726	0.048181224	FLT3	ENSG00000122025	hsa_circFLT3_015	-	318	ANNOTATED, CDS, coding, INTERNAL, OVCODE, OVEXON	0.9932719	NA	NA	hsa-miR-4659b-3p:306.00, hsa-miR-6508-3p:165.00, hsa-miR-3182:163.00, hsa-miR-4528:160.00, hsa-miR-4727-5p:159.00, hsa-miR-4747-5p:159.00, hsa-miR-544a:159.00	GCCCGTCTGCCTGTAAAATGGATGGCCCCCGAAAGCCTGTTTGAAGGCATCTACACCATTAAGAGTGATGTCTGGTCATATGGAATATTACTGTGGGAAATCTTCTCACTTGGTGTGAATCCTTACCCTGGCATTCCGGTTGATGCTAACTTCTACAAACTGATTCAAAATGGATTTAAAATGGATCAGCCATTTTATGCTACAGAAGAAATATACATTATAATGCAATCCTGCTGGGCTTTTGACTCAAGGAAACGGCCATCCTTCCCTAATTTGACTTCGTTTTTAGGATGTCAGCTGGCAGATGCAGAAGAAGCG
0	hsa_circ_0029829	chr13:28589293-28589838	-4543601018	0.040636321	FLT3	ENSG00000122025	hsa_circFLT3_014	-	212	ANNOTATED, CDS, coding, INTERNAL, OVCODE, OVEXON	0.12728517975232	NA	NA	hsa-miR-6508-3p:165.00, hsa-miR-3182:163.00, hsa-miR-4699-5p:158.00, hsa-miR-3674:156.00, hsa-miR-4659a-3p:156.00, hsa-miR-4659b-3p:156.00, hsa-miR-4670-3p:156.00, hsa-miR-889-5p:156.00	GCCCGTCTGCCTGTAAAATGGATGGCCCCCGAAAGCCTGTTTGAAGGCATCTACACCATTAAGAGTGATGTCTGGTCATATGGAATATTACTGTGGGAAATCTTCTCACTTGGTGTGAATCCTTACCCTGGCATTCCGGTTGATGCTAACTTCTACAAACTGATTCAAAATGGATTTAAAATGGATCAGCCATTTTATGCTACAGAAGAAAT
0	hsa_circ_0100162	chr13:28589293-28597614	-4425106548	0.013614228	FLT3	ENSG00000122025	hsa_circFLT3_013	-	472	ANNOTATED, CDS, coding, INTERNAL, OVCODE, OVEXON	0.9090061	NA	NA	hsa-miR-23c:172.00, hsa-miR-6508-3p:165.00, hsa-miR-3156-5p:163.00, hsa-miR-3182:163.00, hsa-miR-7161-3p:161.00	ATGAAATTGAATATGAAAACCAAAAAAGGCTGGAAGAAGAGGAGGACTTGAATGTGCTTACATTTGAAGATCTTCTTTGCTTTGCATATCAAGTTGCCAAAGGAATGGAATTTCTGGAATTTAAGTCGTGTGTTCACAGAGACCTGGCCGCCAGGAACGTGCTTGTCACCCACGGGAAAGTGGTGAAGATATGTGACTTTGGATTGGCTCGAGATATCATGAGTGATTCCAACTATGTTGTCAGGGGCAATGTGAGGCTGGCCCGTCTGCCTGTAAAATGGATGGCCCCCGAAAGCCTGTTTGAAGGCATCTACACCATTAAGAGTGATGTCTGGTCATATGGAATATTACTGTGGGAAATCTTCTCACTTGGTGTGAATCCTTACCCTGGCATTCCGG…
0	hsa_circ_0100162	chr13:28589293-28597614	-4504342361	0.033739254	FLT3	ENSG00000122025	hsa_circFLT3_013	-	472	ANNOTATED, CDS, coding, INTERNAL, OVCODE, OVEXON	0.9090061	NA	NA	hsa-miR-23c:172.00, hsa-miR-6508-3p:165.00, hsa-miR-3156-5p:163.00, hsa-miR-3182:163.00, hsa-miR-7161-3p:161.00	ATGAAATTGAATATGAAAACCAAAAAAGGCTGGAAGAAGAGGAGGACTTGAATGTGCTTACATTTGAAGATCTTCTTTGCTTTGCATATCAAGTTGCCAAAGGAATGGAATTTCTGGAATTTAAGTCGTGTGTTCACAGAGACCTGGCCGCCAGGAACGTGCTTGTCACCCACGGGAAAGTGGTGAAGATATGTGACTTTGGATTGGCTCGAGATATCATGAGTGATTCCAACTATGTTGTCAGGGGCAATGTGAGGCTGGCCCGTCTGCCTGTAAAATGGATGGCCCCCGAAAGCCTGTTTGAAGGCATCTACACCATTAAGAGTGATGTCTGGTCATATGGAATATTACTGTGGGAAATCTTCTCACTTGGTGTGAATCCTTACCCTGGCATTCCGG…
0	NA	chr13:28592603-28602425	-5383008956	0.002062098	FLT3	ENSG00000122025	NA	NA	NA	NA	NA	NA	NA	NA	NA
0	NA	chr13:28592603-28602425	-4299592638	0.016039419	FLT3	ENSG00000122025	NA	NA	NA	NA	NA	NA	NA	NA	NA
0	hsa_circ_0100163	chr13:28597486-28602425	-714218831	3.06e-06	FLT3	ENSG00000122025	hsa_circFLT3_012	-	476	ANNOTATED, CDS, coding, INTERNAL, OVCODE, OVEXON	0.4729596	NA	NA	hsa-miR-515-3p:178.00, hsa-miR-519e-3p:178.00, hsa-miR-6719-3p:175.00, hsa-miR-548aq-3p:164.00, hsa-miR-3156-5p:163.00, hsa-miR-548ae-3p:163.00, hsa-miR-548aj-3p:163.00, hsa-miR-548ar-3p:163.00, hsa-miR-6876-3p:163.00, hsa-miR-759:163.00	AAAAAGCAGACAGCTCTGAAAGAGAGGCACTCATGTCAGAACTCAAGATGATGACCCAGCTGGGAAGCCACGAGAATATTGTGAACCTGCTGGGGGCGTGCACACTGTCAGGACCAATTTACTTGATTTTTGAATACTGTTGCTATGGTGATCTTCTCAACTATCTAAGAAGTAAAAGAGAAAAATTTCACAGGACTTGGACAGAGATTTTCAAGGAACACAATTTCAGTTTTTACCCCACTTTCCAATCACATCCAAATTCCAGCATGCCTGGTTCAAGAGAAGTTCAGATACACCCGGACTCGGATCAAATCTCAGGGCTTCATGGGAATTCATTTCACTCTGAAGATGAAATTGAATATGAAAACCAAAAAAGGCTGGAAGAAGAGGAGGACTTGA…
0	hsa_circ_0100163	chr13:28597486-28602425	-5307900032	0.024391405	FLT3	ENSG00000122025	hsa_circFLT3_012	-	476	ANNOTATED, CDS, coding, INTERNAL, OVCODE, OVEXON	0.4729596	NA	NA	hsa-miR-515-3p:178.00, hsa-miR-519e-3p:178.00, hsa-miR-6719-3p:175.00, hsa-miR-548aq-3p:164.00, hsa-miR-3156-5p:163.00, hsa-miR-548ae-3p:163.00, hsa-miR-548aj-3p:163.00, hsa-miR-548ar-3p:163.00, hsa-miR-6876-3p:163.00, hsa-miR-759:163.00	AAAAAGCAGACAGCTCTGAAAGAGAGGCACTCATGTCAGAACTCAAGATGATGACCCAGCTGGGAAGCCACGAGAATATTGTGAACCTGCTGGGGGCGTGCACACTGTCAGGACCAATTTACTTGATTTTTGAATACTGTTGCTATGGTGATCTTCTCAACTATCTAAGAAGTAAAAGAGAAAAATTTCACAGGACTTGGACAGAGATTTTCAAGGAACACAATTTCAGTTTTTACCCCACTTTCCAATCACATCCAAATTCCAGCATGCCTGGTTCAAGAGAAGTTCAGATACACCCGGACTCGGATCAAATCTCAGGGCTTCATGGGAATTCATTTCACTCTGAAGATGAAATTGAATATGAAAACCAAAAAAGGCTGGAAGAAGAGGAGGACTTGA…
0	hsa_circ_0100163	chr13:28597486-28602425	-5974792783	0.000188717	FLT3	ENSG00000122025	hsa_circFLT3_012	-	476	ANNOTATED, CDS, coding, INTERNAL, OVCODE, OVEXON	0.4729596	NA	NA	hsa-miR-515-3p:178.00, hsa-miR-519e-3p:178.00, hsa-miR-6719-3p:175.00, hsa-miR-548aq-3p:164.00, hsa-miR-3156-5p:163.00, hsa-miR-548ae-3p:163.00, hsa-miR-548aj-3p:163.00, hsa-miR-548ar-3p:163.00, hsa-miR-6876-3p:163.00, hsa-miR-759:163.00	AAAAAGCAGACAGCTCTGAAAGAGAGGCACTCATGTCAGAACTCAAGATGATGACCCAGCTGGGAAGCCACGAGAATATTGTGAACCTGCTGGGGGCGTGCACACTGTCAGGACCAATTTACTTGATTTTTGAATACTGTTGCTATGGTGATCTTCTCAACTATCTAAGAAGTAAAAGAGAAAAATTTCACAGGACTTGGACAGAGATTTTCAAGGAACACAATTTCAGTTTTTACCCCACTTTCCAATCACATCCAAATTCCAGCATGCCTGGTTCAAGAGAAGTTCAGATACACCCGGACTCGGATCAAATCTCAGGGCTTCATGGGAATTCATTTCACTCTGAAGATGAAATTGAATATGAAAACCAAAAAAGGCTGGAAGAAGAGGAGGACTTGA…
0	hsa_circ_0100164	chr13:28598997-28602425	-70340459	7.7e-06	FLT3	ENSG00000122025	hsa_circFLT3_011	-	348	ANNOTATED, CDS, coding, INTERNAL, OVCODE, OVEXON	0.9934899	NA	NA	hsa-miR-515-3p:178.00, hsa-miR-519e-3p:178.00, hsa-miR-6719-3p:175.00, hsa-miR-548aq-3p:164.00, hsa-miR-548ae-3p:163.00, hsa-miR-548aj-3p:163.00, hsa-miR-548ar-3p:163.00, hsa-miR-6876-3p:163.00, hsa-miR-759:163.00	AAAAAGCAGACAGCTCTGAAAGAGAGGCACTCATGTCAGAACTCAAGATGATGACCCAGCTGGGAAGCCACGAGAATATTGTGAACCTGCTGGGGGCGTGCACACTGTCAGGACCAATTTACTTGATTTTTGAATACTGTTGCTATGGTGATCTTCTCAACTATCTAAGAAGTAAAAGAGAAAAATTTCACAGGACTTGGACAGAGATTTTCAAGGAACACAATTTCAGTTTTTACCCCACTTTCCAATCACATCCAAATTCCAGCATGCCTGGTTCAAGAGAAGTTCAGATACACCCGGACTCGGATCAAATCTCAGGGCTTCATGGGAATTCATTTCACTCTGAAG
0	hsa_circ_0100164	chr13:28598997-28602425	-6125969826	0.000147207	FLT3	ENSG00000122025	hsa_circFLT3_011	-	348	ANNOTATED, CDS, coding, INTERNAL, OVCODE, OVEXON	0.9934899	NA	NA	hsa-miR-515-3p:178.00, hsa-miR-519e-3p:178.00, hsa-miR-6719-3p:175.00, hsa-miR-548aq-3p:164.00, hsa-miR-548ae-3p:163.00, hsa-miR-548aj-3p:163.00, hsa-miR-548ar-3p:163.00, hsa-miR-6876-3p:163.00, hsa-miR-759:163.00	AAAAAGCAGACAGCTCTGAAAGAGAGGCACTCATGTCAGAACTCAAGATGATGACCCAGCTGGGAAGCCACGAGAATATTGTGAACCTGCTGGGGGCGTGCACACTGTCAGGACCAATTTACTTGATTTTTGAATACTGTTGCTATGGTGATCTTCTCAACTATCTAAGAAGTAAAAGAGAAAAATTTCACAGGACTTGGACAGAGATTTTCAAGGAACACAATTTCAGTTTTTACCCCACTTTCCAATCACATCCAAATTCCAGCATGCCTGGTTCAAGAGAAGTTCAGATACACCCGGACTCGGATCAAATCTCAGGGCTTCATGGGAATTCATTTCACTCTGAAG
0	hsa_circ_0100164	chr13:28598997-28602425	-4999852239	0.044311274	FLT3	ENSG00000122025	hsa_circFLT3_011	-	348	ANNOTATED, CDS, coding, INTERNAL, OVCODE, OVEXON	0.9934899	NA	NA	hsa-miR-515-3p:178.00, hsa-miR-519e-3p:178.00, hsa-miR-6719-3p:175.00, hsa-miR-548aq-3p:164.00, hsa-miR-548ae-3p:163.00, hsa-miR-548aj-3p:163.00, hsa-miR-548ar-3p:163.00, hsa-miR-6876-3p:163.00, hsa-miR-759:163.00	AAAAAGCAGACAGCTCTGAAAGAGAGGCACTCATGTCAGAACTCAAGATGATGACCCAGCTGGGAAGCCACGAGAATATTGTGAACCTGCTGGGGGCGTGCACACTGTCAGGACCAATTTACTTGATTTTTGAATACTGTTGCTATGGTGATCTTCTCAACTATCTAAGAAGTAAAAGAGAAAAATTTCACAGGACTTGGACAGAGATTTTCAAGGAACACAATTTCAGTTTTTACCCCACTTTCCAATCACATCCAAATTCCAGCATGCCTGGTTCAAGAGAAGTTCAGATACACCCGGACTCGGATCAAATCTCAGGGCTTCATGGGAATTCATTTCACTCTGAAG
0	hsa_circ_0100165	chr13:28608023-28624359	-5220662858	0.002076894	FLT3	ENSG00000122025	hsa_circFLT3_008	-	1328	ANNOTATED, CDS, coding, INTERNAL, OVCODE, OVEXON	0.9988746	NA	NA	hsa-miR-513b-5p:328.00, hsa-miR-4709-3p:314.00, hsa-miR-135b-5p:306.00, hsa-miR-5196-5p:170.00, hsa-miR-548ad-3p:170.00	CTGTAAAGAAGAAAGTCCAGCTGTTGTTAAAAAGGAGGAAAAAGTGCTTCATGAATTATTTGGGACGGACATAAGGTGCTGTGCCAGAAATGAACTGGGCAGGGAATGCACCAGGCTGTTCACAATAGATCTAAATCAAACTCCTCAGACCACATTGCCACAATTATTTCTTAAAGTAGGGGAACCCTTATGGATAAGGTGCAAAGCTGTTCATGTGAACCATGGATTCGGGCTCACCTGGGAATTAGAAAACAAAGCACTCGAGGAGGGCAACTACTTTGAGATGAGTACCTATTCAACAAACAGAACTATGATACGGATTCTGTTTGCTTTTGTATCATCAGTGGCAAGAAACGACACCGGATACTACACTTGTTCCTCTTCAAAGCATCCCAGTCA…
0	hsa_circ_0100165	chr13:28608023-28624359	-5571899563	0.001223409	FLT3	ENSG00000122025	hsa_circFLT3_008	-	1328	ANNOTATED, CDS, coding, INTERNAL, OVCODE, OVEXON	0.9988746	NA	NA	hsa-miR-513b-5p:328.00, hsa-miR-4709-3p:314.00, hsa-miR-135b-5p:306.00, hsa-miR-5196-5p:170.00, hsa-miR-548ad-3p:170.00	CTGTAAAGAAGAAAGTCCAGCTGTTGTTAAAAAGGAGGAAAAAGTGCTTCATGAATTATTTGGGACGGACATAAGGTGCTGTGCCAGAAATGAACTGGGCAGGGAATGCACCAGGCTGTTCACAATAGATCTAAATCAAACTCCTCAGACCACATTGCCACAATTATTTCTTAAAGTAGGGGAACCCTTATGGATAAGGTGCAAAGCTGTTCATGTGAACCATGGATTCGGGCTCACCTGGGAATTAGAAAACAAAGCACTCGAGGAGGGCAACTACTTTGAGATGAGTACCTATTCAACAAACAGAACTATGATACGGATTCTGTTTGCTTTTGTATCATCAGTGGCAAGAAACGACACCGGATACTACACTTGTTCCTCTTCAAAGCATCCCAGTCA…
0	hsa_circ_0100168	chr13:28611321-28624359	-6468645285	3.58e-05	FLT3	ENSG00000122025	hsa_circFLT3_006	-	695	ANNOTATED, CDS, coding, INTERNAL, OVCODE, OVEXON	0.2502947	NA	NA	hsa-miR-513b-5p:169.00, hsa-miR-5011-3p:164.00, hsa-miR-3660:163.00, hsa-miR-6759-5p:163.00, hsa-miR-6812-5p:163.00, hsa-miR-8058:163.00	CTGTAAAGAAGAAAGTCCAGCTGTTGTTAAAAAGGAGGAAAAAGTGCTTCATGAATTATTTGGGACGGACATAAGGTGCTGTGCCAGAAATGAACTGGGCAGGGAATGCACCAGGCTGTTCACAATAGATCTAAATCAAACTCCTCAGACCACATTGCCACAATTATTTCTTAAAGTAGGGGAACCCTTATGGATAAGGTGCAAAGCTGTTCATGTGAACCATGGATTCGGGCTCACCTGGGAATTAGAAAACAAAGCACTCGAGGAGGGCAACTACTTTGAGATGAGTACCTATTCAACAAACAGAACTATGATACGGATTCTGTTTGCTTTTGTATCATCAGTGGCAAGAAACGACACCGGATACTACACTTGTTCCTCTTCAAAGCATCCCAGTCA…
0	hsa_circ_0100168	chr13:28611321-28624359	-5285568993	0.004003969	FLT3	ENSG00000122025	hsa_circFLT3_006	-	695	ANNOTATED, CDS, coding, INTERNAL, OVCODE, OVEXON	0.2502947	NA	NA	hsa-miR-513b-5p:169.00, hsa-miR-5011-3p:164.00, hsa-miR-3660:163.00, hsa-miR-6759-5p:163.00, hsa-miR-6812-5p:163.00, hsa-miR-8058:163.00	CTGTAAAGAAGAAAGTCCAGCTGTTGTTAAAAAGGAGGAAAAAGTGCTTCATGAATTATTTGGGACGGACATAAGGTGCTGTGCCAGAAATGAACTGGGCAGGGAATGCACCAGGCTGTTCACAATAGATCTAAATCAAACTCCTCAGACCACATTGCCACAATTATTTCTTAAAGTAGGGGAACCCTTATGGATAAGGTGCAAAGCTGTTCATGTGAACCATGGATTCGGGCTCACCTGGGAATTAGAAAACAAAGCACTCGAGGAGGGCAACTACTTTGAGATGAGTACCTATTCAACAAACAGAACTATGATACGGATTCTGTTTGCTTTTGTATCATCAGTGGCAAGAAACGACACCGGATACTACACTTGTTCCTCTTCAAAGCATCCCAGTCA…
0	hsa_circ_0100168	chr13:28611321-28624359	-7190926607	4.17e-06	FLT3	ENSG00000122025	hsa_circFLT3_006	-	695	ANNOTATED, CDS, coding, INTERNAL, OVCODE, OVEXON	0.2502947	NA	NA	hsa-miR-513b-5p:169.00, hsa-miR-5011-3p:164.00, hsa-miR-3660:163.00, hsa-miR-6759-5p:163.00, hsa-miR-6812-5p:163.00, hsa-miR-8058:163.00	CTGTAAAGAAGAAAGTCCAGCTGTTGTTAAAAAGGAGGAAAAAGTGCTTCATGAATTATTTGGGACGGACATAAGGTGCTGTGCCAGAAATGAACTGGGCAGGGAATGCACCAGGCTGTTCACAATAGATCTAAATCAAACTCCTCAGACCACATTGCCACAATTATTTCTTAAAGTAGGGGAACCCTTATGGATAAGGTGCAAAGCTGTTCATGTGAACCATGGATTCGGGCTCACCTGGGAATTAGAAAACAAAGCACTCGAGGAGGGCAACTACTTTGAGATGAGTACCTATTCAACAAACAGAACTATGATACGGATTCTGTTTGCTTTTGTATCATCAGTGGCAAGAAACGACACCGGATACTACACTTGTTCCTCTTCAAAGCATCCCAGTCA…
0	hsa_circ_0100171	chr13:28622411-28624359	-5478145045	0.00044609	FLT3	ENSG00000122025	hsa_circFLT3_005	-	591	ANNOTATED, CDS, coding, INTERNAL, OVCODE, OVEXON	0.9999827	NA	NA	hsa-miR-513b-5p:169.00, hsa-miR-3660:163.00, hsa-miR-6759-5p:163.00, hsa-miR-6812-5p:163.00, hsa-miR-8058:163.00	CTGTAAAGAAGAAAGTCCAGCTGTTGTTAAAAAGGAGGAAAAAGTGCTTCATGAATTATTTGGGACGGACATAAGGTGCTGTGCCAGAAATGAACTGGGCAGGGAATGCACCAGGCTGTTCACAATAGATCTAAATCAAACTCCTCAGACCACATTGCCACAATTATTTCTTAAAGTAGGGGAACCCTTATGGATAAGGTGCAAAGCTGTTCATGTGAACCATGGATTCGGGCTCACCTGGGAATTAGAAAACAAAGCACTCGAGGAGGGCAACTACTTTGAGATGAGTACCTATTCAACAAACAGAACTATGATACGGATTCTGTTTGCTTTTGTATCATCAGTGGCAAGAAACGACACCGGATACTACACTTGTTCCTCTTCAAAGCATCCCAGTCA…
0	hsa_circ_0100171	chr13:28622411-28624359	-4855538992	0.011676721	FLT3	ENSG00000122025	hsa_circFLT3_005	-	591	ANNOTATED, CDS, coding, INTERNAL, OVCODE, OVEXON	0.9999827	NA	NA	hsa-miR-513b-5p:169.00, hsa-miR-3660:163.00, hsa-miR-6759-5p:163.00, hsa-miR-6812-5p:163.00, hsa-miR-8058:163.00	CTGTAAAGAAGAAAGTCCAGCTGTTGTTAAAAAGGAGGAAAAAGTGCTTCATGAATTATTTGGGACGGACATAAGGTGCTGTGCCAGAAATGAACTGGGCAGGGAATGCACCAGGCTGTTCACAATAGATCTAAATCAAACTCCTCAGACCACATTGCCACAATTATTTCTTAAAGTAGGGGAACCCTTATGGATAAGGTGCAAAGCTGTTCATGTGAACCATGGATTCGGGCTCACCTGGGAATTAGAAAACAAAGCACTCGAGGAGGGCAACTACTTTGAGATGAGTACCTATTCAACAAACAGAACTATGATACGGATTCTGTTTGCTTTTGTATCATCAGTGGCAAGAAACGACACCGGATACTACACTTGTTCCTCTTCAAAGCATCCCAGTCA…
0	hsa_circ_0100173	chr13:28636003-28644749	-4498273424	0.037967752	FLT3	ENSG00000122025	hsa_circFLT3_001	-	325	ANNOTATED, CDS, coding, INTERNAL, OVCODE, OVEXON	0.2064736	NA	NA	hsa-miR-1912:166.00, hsa-miR-4791:166.00, hsa-miR-7161-3p:166.00, hsa-miR-6754-5p:165.00, hsa-miR-6791-5p:163.00	TTGTTTTTTCTGCAATGATATTTGGGACTATTACAAATCAAGATCTGCCTGTGATCAAGTGTGTTTTAATCAATCATAAGAACAATGATTCATCAGTGGGGAAGTCATCATCATATCCCATGGTATCAGAATCCCCGGAAGACCTCGGGTGTGCGTTGAGACCCCAGAGCTCAGGGACAGTGTACGAAGCTGCCGCTGTGGAAGTGGATGTATCTGCTTCCATCACACTGCAAGTGCTGGTCGACGCCCCAGGGAACATTTCCTGTCTCTGGGTCTTTAAGCACAGCTCCCTGAATTGCCAGCCACATTTTGATTTACAAAACAG
0	hsa_circ_0100173	chr13:28636003-28644749	-378871551	0.039648817	FLT3	ENSG00000122025	hsa_circFLT3_001	-	325	ANNOTATED, CDS, coding, INTERNAL, OVCODE, OVEXON	0.2064736	NA	NA	hsa-miR-1912:166.00, hsa-miR-4791:166.00, hsa-miR-7161-3p:166.00, hsa-miR-6754-5p:165.00, hsa-miR-6791-5p:163.00	TTGTTTTTTCTGCAATGATATTTGGGACTATTACAAATCAAGATCTGCCTGTGATCAAGTGTGTTTTAATCAATCATAAGAACAATGATTCATCAGTGGGGAAGTCATCATCATATCCCATGGTATCAGAATCCCCGGAAGACCTCGGGTGTGCGTTGAGACCCCAGAGCTCAGGGACAGTGTACGAAGCTGCCGCTGTGGAAGTGGATGTATCTGCTTCCATCACACTGCAAGTGCTGGTCGACGCCCCAGGGAACATTTCCTGTCTCTGGGTCTTTAAGCACAGCTCCCTGAATTGCCAGCCACATTTTGATTTACAAAACAG
0.551	hsa_circ_0005831	chr13:28748408-28794515	-4636509442	0.008946786	PAN3	ENSG00000152520	hsa_circPAN3_008	+	570	ANNOTATED, CDS, coding, INTERNAL, OVCODE, OVEXON	0.999999517592409	0.002135954	NA	hsa-miR-3158-3p:303.00, hsa-miR-512-5p:167.00, hsa-miR-4429:163.00, hsa-miR-548q:163.00, hsa-miR-6761-5p:163.00, hsa-miR-758-3p:163.00	TTCCAGGAATGGATGGAGGTGCTTTAACTGATACAAGTCTCACAGATTCCTATTTTAGCACCAGCTTTATTGGAGTCAATGGATTTGGAAGCCCTGTAGAAACAAAATATCCCCTGATGCAGAGAATGACTAATAGTAGCAGCTCCCCAAGCCTTCTAAATGACAGTGCCAAGCCATATTCAGCCCATGATCCTCTAACATCACCTGCTTCATCCTTGTTTAATGACTTTGGTGCCCTCAACATCTCTCAGAGACGAAAGCCAAGGAAGTATCGCCTGGGGATGCTGGAGGAGAGGCTAGTTCCGATGGGATCAAAGGCACGAAAAGCAAAGAACCCTATTGGCTGCCTTGCTGACAGGTGTAAATCAGGAGTACCCATCAATATGGTTTGGTGGAACA…
0.551	hsa_circ_0005831	chr13:28748408-28794515	-6421276604	1.82e-05	PAN3	ENSG00000152520	hsa_circPAN3_008	+	570	ANNOTATED, CDS, coding, INTERNAL, OVCODE, OVEXON	0.999999517592409	0.002135954	NA	hsa-miR-3158-3p:303.00, hsa-miR-512-5p:167.00, hsa-miR-4429:163.00, hsa-miR-548q:163.00, hsa-miR-6761-5p:163.00, hsa-miR-758-3p:163.00	TTCCAGGAATGGATGGAGGTGCTTTAACTGATACAAGTCTCACAGATTCCTATTTTAGCACCAGCTTTATTGGAGTCAATGGATTTGGAAGCCCTGTAGAAACAAAATATCCCCTGATGCAGAGAATGACTAATAGTAGCAGCTCCCCAAGCCTTCTAAATGACAGTGCCAAGCCATATTCAGCCCATGATCCTCTAACATCACCTGCTTCATCCTTGTTTAATGACTTTGGTGCCCTCAACATCTCTCAGAGACGAAAGCCAAGGAAGTATCGCCTGGGGATGCTGGAGGAGAGGCTAGTTCCGATGGGATCAAAGGCACGAAAAGCAAAGAACCCTATTGGCTGCCTTGCTGACAGGTGTAAATCAGGAGTACCCATCAATATGGTTTGGTGGAACA…
0.551	hsa_circ_0005831	chr13:28748408-28794515	-5595888308	0.000212875	PAN3	ENSG00000152520	hsa_circPAN3_008	+	570	ANNOTATED, CDS, coding, INTERNAL, OVCODE, OVEXON	0.999999517592409	0.002135954	NA	hsa-miR-3158-3p:303.00, hsa-miR-512-5p:167.00, hsa-miR-4429:163.00, hsa-miR-548q:163.00, hsa-miR-6761-5p:163.00, hsa-miR-758-3p:163.00	TTCCAGGAATGGATGGAGGTGCTTTAACTGATACAAGTCTCACAGATTCCTATTTTAGCACCAGCTTTATTGGAGTCAATGGATTTGGAAGCCCTGTAGAAACAAAATATCCCCTGATGCAGAGAATGACTAATAGTAGCAGCTCCCCAAGCCTTCTAAATGACAGTGCCAAGCCATATTCAGCCCATGATCCTCTAACATCACCTGCTTCATCCTTGTTTAATGACTTTGGTGCCCTCAACATCTCTCAGAGACGAAAGCCAAGGAAGTATCGCCTGGGGATGCTGGAGGAGAGGCTAGTTCCGATGGGATCAAAGGCACGAAAAGCAAAGAACCCTATTGGCTGCCTTGCTGACAGGTGTAAATCAGGAGTACCCATCAATATGGTTTGGTGGAACA…
7133	hsa_circ_0008902	chr13:28830428-28835595	-4059565197	1.42e-07	PAN3	ENSG00000152520	hsa_circPAN3_032	+	411	ANNOTATED, CDS, coding, INTERNAL, OVCODE, OVEXON	0.999944586867412	NA	NA	hsa-miR-4709-3p:310.00, hsa-miR-6780b-5p:177.00, hsa-miR-605-3p:175.00, hsa-miR-654-3p:168.00, hsa-miR-378j:165.00	GAATGTCGTTGTCTGCTGGGTCTTCCCCTCTTCATTCCCCCAAGATTACTCCACATACTTCTCCTGCTCCCAGAAGAAGAAGTCACACTCCAAATCCAGCAAGTTACATGGTGCCTTCTAGTGCCTCTACATCTGTTAATAATCCTGTTTCTCAGACTCCGTCTTCTGGTCAGGTGATCCAAAAGGAAACTGTTGGTGGGACGACTTACTTCTATACAGACACAACTCCAGCACCTTTGACTGGAATGGTGTTTCCAAACTATCATATTTATCCTCCAACTGCACCTCACGTTGCTTATATGCAACCGAAAGCAAACGCACCTTCCTTCTTCATGGCTGATGAACTCCGACAGGAGCTGATCAACAGACATTTAATAACAATGGCTCAAATTGATCAAG…
10168	hsa_circ_0029853	chr13:28830428-28855516	-3113801373	1.12e-05	PAN3	ENSG00000152520	hsa_circPAN3_039	+	1384	ANNOTATED, CDS, coding, INTERNAL, OVCODE, OVEXON	0.999993772173403	NA	NA	hsa-miR-605-3p:340.00, hsa-miR-4709-3p:310.00, hsa-miR-4659a-3p:307.00, hsa-miR-6780b-5p:177.00, hsa-miR-4699-3p:174.00	GAATGTCGTTGTCTGCTGGGTCTTCCCCTCTTCATTCCCCCAAGATTACTCCACATACTTCTCCTGCTCCCAGAAGAAGAAGTCACACTCCAAATCCAGCAAGTTACATGGTGCCTTCTAGTGCCTCTACATCTGTTAATAATCCTGTTTCTCAGACTCCGTCTTCTGGTCAGGTGATCCAAAAGGAAACTGTTGGTGGGACGACTTACTTCTATACAGACACAACTCCAGCACCTTTGACTGGAATGGTGTTTCCAAACTATCATATTTATCCTCCAACTGCACCTCACGTTGCTTATATGCAACCGAAAGCAAACGCACCTTCCTTCTTCATGGCTGATGAACTCCGACAGGAGCTGATCAACAGACATTTAATAACAATGGCTCAAATTGATCAAG…
1012	hsa_circ_0000469	chr13:28840851-28845003	-5674667624	0.000425861	PAN3	ENSG00000152520	hsa_circPAN3_047	+	547	ANNOTATED, CDS, coding, INTERNAL, OVCODE, OVEXON	0.245034979278596	0.003200513	NA	hsa-miR-3145-3p:173.00, hsa-miR-518e-5p:166.00, hsa-miR-519a-5p:166.00, hsa-miR-519b-5p:166.00, hsa-miR-519c-5p:166.00, hsa-miR-522-5p:166.00, hsa-miR-523-5p:166.00, hsa-miR-92a-1-5p:166.00	CAGTTCCTACAGAGGTTGACAGCTACCATAGCCTATTCCCTCTAGAACCACTGCCACCTCCCAACCGGATACAGAAATCAAGTAATTTTGGATATATTACATCTTGCTACAAAGCTGTAAACAGCAAAGATGATCTGCCATATTGCCTTCGGAGGATACATGGTTTTCGTCTTGTTAACACAAAGTGCATGGTGTTGGTCGACATGTGGAAGAAAATTCAACACTCAAATATCGTAACTTTGCGTGAAGTATTTACCACTAAAGCATTTGCTGAGCCCTCTCTTGTGTTTGCATATGATTTCCATGCTGGAGGAGAAACTATGATGAGCAGACACTTTAATGACCCTAATGCTGATGCCTACTTCACCAAGAGAAAGTGGGGTCAGCACGAGGGACCAT…
14282	hsa_circ_0000497	chr13:78293666-78327493	-2226174888	0.004914559	SLAIN1	ENSG00000139737	hsa_circSLAIN1_010	+	788	ANNOTATED, CDS, coding, INTERNAL	0.965710023292932	0.24304297	NA	hsa-miR-4691-5p:308.00, hsa-miR-4646-5p:307.00, hsa-miR-1238-5p:171.00, hsa-miR-3150a-3p:171.00, hsa-miR-3618:171.00	GTTATACATTGGCTCTTCAAAGACGTTCACCTCATCAGAGAAATCCCTGACTCCTTTGCAGTGGTGTAGACATGTCCTAGATAACCCAACTCCTGAGATGGAAGCAGCGAGACGTTCCCTGTGCTTTAGACTGGAGCAAGGTTACACTTCCAGGGGCTCCCCACTCAGTCCCCAGTCATCTATCGACAGTGAGCTGAGTACTTCAGAATTGGAGGATGATTCTATCTCCATGGGATATAAATTACAGGACCTCACTGATGTTCAGATCATGGCTCGTCTGCAAGAAGAAAGTCTCAGGCAAGATTATGCTTCTACTTCAGCATCTGTATCAAGACATAGTTCCAGTGTGTCATTGAGTTCAGGAAAAAAAGGGACATGTAGTGATCAAGAATATGACCA…
7888	hsa_circ_0031584	chr14:32559707-32586493	-2116390772	0.039640641	ARHGAP5	ENSG00000100852	hsa_circARHGAP5_004	+	4033	ANNOTATED, CDS, coding, INTERNAL, OVCODE, OVERLAPTX, OVEXON, UTR5	1	0.851792844	NA	hsa-miR-4762-3p:460.00, hsa-miR-329-5p:325.00, hsa-miR-6844:322.00, hsa-miR-1264:320.00, hsa-miR-19a-3p:320.00, hsa-miR-4686:320.00	GAAGATGATCCCTATGATCTTGAAGATGTTTCTGCACAGAAATGAGGGAAATACAAAGAACCAAATACAGTTCTGAAATTTGGGATCTGTATTTTGAGATGATTTTATTTTCAGAATGAGAAGCATATCTGGTTACCTTTATGAATGTAGAGACATGAGAAGAGAGTTATGATGGCAAAAAACAAAGAGCCTCGTCCCCCATCCTATACCATCAGTATAGTTGGACTCTCTGGGACTGAAAAAGACAAAGGTAACTGTGGAGTTGGAAAGTCTTGTTTGTGCAATAGATTTGTACGCTCAAAAGCAGATGAATATTATCCAGAGCATACTTCTGTGCTTAGCACCATTGACTTTGGAGGACGAGTAGTAAACAATGATCACTTTTTGTACTGGGGTGAC…
7888	hsa_circ_0031584	chr14:32559707-32586493	-2667241816	0.000986553	ARHGAP5	ENSG00000100852	hsa_circARHGAP5_004	+	4033	ANNOTATED, CDS, coding, INTERNAL, OVCODE, OVERLAPTX, OVEXON, UTR5	1	0.851792844	NA	hsa-miR-4762-3p:460.00, hsa-miR-329-5p:325.00, hsa-miR-6844:322.00, hsa-miR-1264:320.00, hsa-miR-19a-3p:320.00, hsa-miR-4686:320.00	GAAGATGATCCCTATGATCTTGAAGATGTTTCTGCACAGAAATGAGGGAAATACAAAGAACCAAATACAGTTCTGAAATTTGGGATCTGTATTTTGAGATGATTTTATTTTCAGAATGAGAAGCATATCTGGTTACCTTTATGAATGTAGAGACATGAGAAGAGAGTTATGATGGCAAAAAACAAAGAGCCTCGTCCCCCATCCTATACCATCAGTATAGTTGGACTCTCTGGGACTGAAAAAGACAAAGGTAACTGTGGAGTTGGAAAGTCTTGTTTGTGCAATAGATTTGTACGCTCAAAAGCAGATGAATATTATCCAGAGCATACTTCTGTGCTTAGCACCATTGACTTTGGAGGACGAGTAGTAAACAATGATCACTTTTTGTACTGGGGTGAC…
7888	hsa_circ_0031584	chr14:32559707-32586493	-3107226281	0.000646795	ARHGAP5	ENSG00000100852	hsa_circARHGAP5_004	+	4033	ANNOTATED, CDS, coding, INTERNAL, OVCODE, OVERLAPTX, OVEXON, UTR5	1	0.851792844	NA	hsa-miR-4762-3p:460.00, hsa-miR-329-5p:325.00, hsa-miR-6844:322.00, hsa-miR-1264:320.00, hsa-miR-19a-3p:320.00, hsa-miR-4686:320.00	GAAGATGATCCCTATGATCTTGAAGATGTTTCTGCACAGAAATGAGGGAAATACAAAGAACCAAATACAGTTCTGAAATTTGGGATCTGTATTTTGAGATGATTTTATTTTCAGAATGAGAAGCATATCTGGTTACCTTTATGAATGTAGAGACATGAGAAGAGAGTTATGATGGCAAAAAACAAAGAGCCTCGTCCCCCATCCTATACCATCAGTATAGTTGGACTCTCTGGGACTGAAAAAGACAAAGGTAACTGTGGAGTTGGAAAGTCTTGTTTGTGCAATAGATTTGTACGCTCAAAAGCAGATGAATATTATCCAGAGCATACTTCTGTGCTTAGCACCATTGACTTTGGAGGACGAGTAGTAAACAATGATCACTTTTTGTACTGGGGTGAC…
44274	hsa_circ_0000566	chr14:97299803-97327072	-2492599418	1.09e-06	VRK1	ENSG00000100749	hsa_circVRK1_007	+	1073	ANNOTATED, CDS, coding, INTERNAL, UTR5	0.999599077776026	0.658291822	chr12_106036539_106062808_+	hsa-miR-6844:306.00, hsa-miR-129-5p:301.00, hsa-miR-153-5p:171.00, hsa-miR-5011-5p:170.00, hsa-miR-18a-5p:167.00	TGAAAATGCCTCGTGTAAAAGCAGCTCAAGCTGGAAGACAGAGCTCTGCAAAGAGACATCTTGCAGAACAATTTGCAGTTGGAGAGATAATAACTGACATGGCAAAAAAGGAATGGAAAGTAGGATTACCCATTGGCCAAGGAGGCTTTGGCTGTATATATCTTGCTGATATGAATTCTTCAGAGTCAGTTGGCAGTGATGCACCTTGTGTTGTAAAAGTGGAACCCAGTGACAATGGACCTCTTTTTACTGAATTAAAGTTCTACCAACGAGCTGCAAAACCAGAGCAAATTCAGAAATGGATTCGTACCCGTAAGCTGAAGTACCTGGGTGTTCCTAAGTATTGGGGGTCTGGTCTACATGACAAAAATGGAAAAAGTTACAGGTTTATGATAATGG…
20057	hsa_circ_0008319	chr15:43120125-43132631	-1774120768	0.011543754	TTBK2	ENSG00000128881	hsa_circTTBK2_018	-	320	ANNOTATED, CDS, coding, INTERNAL, OVCODE, OVEXON	0.620287260373987	0.001063186	chr2_120783694_120790355_-	hsa-miR-455-5p:168.00, hsa-miR-4772-3p:165.00, hsa-miR-3199:163.00, hsa-miR-4727-5p:163.00, hsa-miR-5192:163.00	GGAAAGACCATGTTTGTAGATTTATTGGCTGTGGGAGGAATGATCGATTCAACTATGTGGTCATGCAGTTGCAGGGTCGGAATCTGGCAGATCTTCGCCGTAGCCAGTCCCGAGGCACATTCACCATTAGTACCACTCTCCGGCTGGGTAGACAGATTTTGGAGTCTATTGAAAGCATTCATTCTGTGGGATTCTTGCATCGAGACATCAAACCGTCGAACTTCGCTATGGGTCGCTTTCCTAGTACATGTAGGAAATGTTACATGCTTGATTTTGGCTTGGCTCGACAATTTACCAATTCCTGTGGTGACGTCAGACCA
0	hsa_circ_0105488	chr16:49764681-49823457	-5205428884	0.012554609	ZNF423	ENSG00000102935	hsa_circZNF423_008	-	261	ANNOTATED, CDS, coding, INTERNAL, OVCODE, OVEXON	0.9958208	NA	NA	hsa-miR-5196-3p:322.00, hsa-miR-4649-3p:173.00, hsa-miR-3192-3p:167.00, hsa-miR-7152-5p:165.00, hsa-miR-6786-5p:164.00	TTGAAGAGGGGGAGGCCTCAGACTTCTCGCTGGCCTGGGATTCCTCCGTGACAGCAGCAGGAGGCCTAGAAGGAGAGCCAGAGTGCGATCAGAAAACCAGCCGTGCGCTGGAAGACAGGAACAGCGTGACAAGTCAAGAGGAGAGAAATGAGGATGATGAAGACATGGAGGATGAATCAATTTACACCTGCGATCACTGTCAGCAGGACTTCGAGTCTCTGGCAGACCTGACGGACCACCGGGCCCACCGCTGTCCTGGAG
49588	hsa_circ_0005615	chr16:68155889-68157024	-1645702726	0.017733744	NFATC3	ENSG00000072736	hsa_circNFATC3_003	+	1135	ANNOTATED, CDS, coding, INTERNAL, OVCODE, OVEXON	0.0365930322634745	0.988391715	NA	hsa-miR-6782-5p:313.00, hsa-miR-4701-3p:306.00, hsa-miR-6880-5p:306.00, hsa-miR-3916:174.00, hsa-miR-3142:171.00	ATCTTGAGCCAGATGATTGTGCATCCATTTACATCTTTAATGTAGATCCACCTCCATCTACTTTAACCACACCACTTTGCTTACCACATCATGGATTACCGTCTCACTCTTCTGTTTTGTCACCATCGTTTCAGCTCCAAAGTCACAAAAACTATGAAGGAACTTGTGAGATTCCTGAATCTAAATATAGCCCATTAGGTGGTCCCAAACCCTTTGAGTGCCCAAGTATTCAAATTACATCTATCTCTCCTAACTGTCATCAAGAATTAGATGCACATGAAGATGACCTACAGATAAATGACCCAGAACGGGAATTTTTGGAAAGGCCTTCTAGAGATCATCTCTATCTTCCTCTTGAGCCATCCTACCGGGAGTCTTCTCTTAGTCCTAGTCCTGCCA…
0	hsa_circ_0004087	chr16:80718434-80719026	-5234490587	0.011185454	CDYL2	ENSG00000166446	hsa_circCDYL2_001	-	592	ANNOTATED, CDS, coding, INTERNAL, OVCODE, OVEXON	0.898454816297758	0.562232159	NA	hsa-miR-3907:310.00, hsa-miR-6881-3p:307.00, hsa-miR-4538:176.00, hsa-miR-1250-3p:169.00, hsa-miR-4732-3p:165.00	GTTGAAAGGATTGTAGACAAGAGGAAGAACAAGAAAGGAAAATGGGAGTATCTTATCCGATGGAAAGGCTACGGGAGCACCGAGGACACGTGGGAGCCGGAGCACCACCTCTTGCACTGTGAGGAGTTTATTGATGAATTCAATGGGTTGCACATGTCCAAGGACAAGAGGATCAAGTCAGGGAAGCAGTCCAGTACCTCCAAGCTGCTGCGTGACAGTCGAGGCCCGTCGGTTGAGAAACTGTCCCACAGACCTTCAGATCCTGGAAAGAGCAAGGGGACCTCCCATAAACGGAAGCGAATTAACCCTCCCCTGGCCAAGCCAAAAAAAGGGTATTCAGGCAAGCCCTCTTCAGGAGGTGACAGGGCCACCAAGACGGTGTCTTACAGGACTACCCCC…
3035	hsa_circ_0000745	chr17:20107645-20109225	-472928258	3.5e-05	SPECC1	ENSG00000128487	hsa_circSPECC1_006	+	1580	ANNOTATED, CDS, coding, INTERNAL	0.999976778886969	0.998620187	NA	hsa-miR-29a-5p:323.00, hsa-miR-3150a-3p:320.00, hsa-miR-335-3p:314.00, hsa-miR-3183:311.00, hsa-miR-3147:307.00	GGGCCTTTACAACAACTAAACGGACAGGCATTCCAGCCCCACGGGAATTTTCAGTAACTGTCTCAAGAGAGAGGTCTGTGCCACGTGGTCCCTCCAACCCCAGGAAATCAGTGTCCAGTCCAACTTCTTCCAACACTCCCACTCCTACGAAACACCTGAGGACCCCTTCCACAAAGCCCAAGCAAGAGAATGAAGGTGGAGAAAAGGCTGCGCTTGAGTCCCAAGTTCGGGAACTTTTGGCAGAAGCCAAAGCAAAAGATAGTGAAATTAACAGGCTTCGAAGTGAACTAAAGAAATACAAAGAGAAAAGGACTCTGAACGCTGAGGGGACTGATGCTTTGGGCCCAAATGTCGATGGAACATCAGTCTCCCCAGGTGACACGGAACCTATGATAAGAG…
3035	hsa_circ_0000745	chr17:20107645-20109225	-3597180212	0.005349013	SPECC1	ENSG00000128487	hsa_circSPECC1_006	+	1580	ANNOTATED, CDS, coding, INTERNAL	0.999976778886969	0.998620187	NA	hsa-miR-29a-5p:323.00, hsa-miR-3150a-3p:320.00, hsa-miR-335-3p:314.00, hsa-miR-3183:311.00, hsa-miR-3147:307.00	GGGCCTTTACAACAACTAAACGGACAGGCATTCCAGCCCCACGGGAATTTTCAGTAACTGTCTCAAGAGAGAGGTCTGTGCCACGTGGTCCCTCCAACCCCAGGAAATCAGTGTCCAGTCCAACTTCTTCCAACACTCCCACTCCTACGAAACACCTGAGGACCCCTTCCACAAAGCCCAAGCAAGAGAATGAAGGTGGAGAAAAGGCTGCGCTTGAGTCCCAAGTTCGGGAACTTTTGGCAGAAGCCAAAGCAAAAGATAGTGAAATTAACAGGCTTCGAAGTGAACTAAAGAAATACAAAGAGAAAAGGACTCTGAACGCTGAGGGGACTGATGCTTTGGGCCCAAATGTCGATGGAACATCAGTCTCCCCAGGTGACACGGAACCTATGATAAGAG…
3035	hsa_circ_0000745	chr17:20107645-20109225	-4152708354	0.00186246	SPECC1	ENSG00000128487	hsa_circSPECC1_006	+	1580	ANNOTATED, CDS, coding, INTERNAL	0.999976778886969	0.998620187	NA	hsa-miR-29a-5p:323.00, hsa-miR-3150a-3p:320.00, hsa-miR-335-3p:314.00, hsa-miR-3183:311.00, hsa-miR-3147:307.00	GGGCCTTTACAACAACTAAACGGACAGGCATTCCAGCCCCACGGGAATTTTCAGTAACTGTCTCAAGAGAGAGGTCTGTGCCACGTGGTCCCTCCAACCCCAGGAAATCAGTGTCCAGTCCAACTTCTTCCAACACTCCCACTCCTACGAAACACCTGAGGACCCCTTCCACAAAGCCCAAGCAAGAGAATGAAGGTGGAGAAAAGGCTGCGCTTGAGTCCCAAGTTCGGGAACTTTTGGCAGAAGCCAAAGCAAAAGATAGTGAAATTAACAGGCTTCGAAGTGAACTAAAGAAATACAAAGAGAAAAGGACTCTGAACGCTGAGGGGACTGATGCTTTGGGCCCAAATGTCGATGGAACATCAGTCTCCCCAGGTGACACGGAACCTATGATAAGAG…
3125	hsa_circ_0005455	chr17:44248220-44249598	-3542826279	0.002247148	KANSL1	ENSG00000120071	hsa_circ_chr17_00054	-	1378	INTERGENIC	0.999989165219434	0.993333529	NA	hsa-miR-513c-5p:315.00, hsa-miR-6834-5p:314.00, hsa-miR-4468:312.00, hsa-miR-1264:310.00, hsa-miR-2355-5p:309.00	TCTGTTCTCTGGGGAGGCAGTAAGGGGCCGTGGAGCTGGCCTCGGCCTCGGCATCGGGAGAGGCTGGACTTCCTGTCTCTCTGTGCTGAATGGCTGCGATGGCGCCCGCTCTCACTGACGCAGCAGCTGAAGCACACCATATCCGGTTCAAACTGGCTCCCCCATCCTCTACCTTGTCCCCTGGCAGTGCCGAAAATAACGGCAACGCCAACATCCTTATTGCTGCCAACGGAACCAAAAGAAAAGCCATTGCTGCAGAGGATCCCAGCCTAGATTTCCGAAATAATCCTACCAAGGAAGACTTGGGAAAGCTGCAACCACTGGTGGCATCTTATCTCTGCTCTGATGTAACATCTGTTCCCTCAAAGGAGTCTTTGAAGTTGCAAGGGGTCTTCAGCA…
0	hsa_circ_0044396	chr17:47118739-47119739	-5902750685	0.002058901	IGF2BP1	ENSG00000159217	hsa_circIGF2BP1_010	+	259	ANNOTATED, CDS, coding, INTERNAL, OVCODE, OVEXON	0.451841491882922	NA	NA	hsa-miR-6823-5p:165.00, hsa-miR-548at-5p:164.00, hsa-miR-1266-5p:163.00, hsa-miR-1184:160.00, hsa-miR-6778-3p:160.00	GGCTGACGAGGTTCCCCTGAAGATCCTGGCCCATAATAACTTTGTAGGGCGTCTCATTGGCAAGGAAGGACGGAACCTGAAGAAGGTAGAGCAAGATACCGAGACAAAAATCACCATCTCCTCGTTGCAAGACCTTACCCTTTACAACCCTGAGAGGACCATCACTGTGAAGGGGGCCATCGAGAATTGTTGCAGGGCCGAGCAGGAAATAATGAAGAAAGTTCGGGAGGCCTATGAGAATGATGTGGCTGCCATGAGC
0	hsa_circ_0047037	chr18:13278103-13387761	-5326349416	0.005702811	LDLRAD4	ENSG00000168675	hsa_circC18orf1_005	+	506	ANNOTATED, CDS, coding, INTERNAL, OVCODE, OVERLAPTX, OVEXON, UTR5	0.00639493664030054	NA	NA	hsa-miR-4767:330.00, hsa-miR-2277-5p:327.00, hsa-miR-6737-3p:320.00, hsa-miR-5008-3p:306.00, hsa-miR-6813-5p:167.00	CGGTTCAAGCTCTACGTTCGTGACATCAAACCTCCTGTTGGGCCATTTCCGAGAACTCCCATCAGTTTCTGTATAGTGTAAAAGTTTCAGAGGCGGAGCACAGAGAGCTGCGGCTGGGACAAGGAGCACCCGCGTGCAGGTGCGACCCTGCAGGATGCTGGCAGCGGCGTGGCCAGGGGCGCCCGTGTTCTGAGGGCCTGAGGGCCAGCCCCTCCACCCGCGCCATGGCCTCCGCGCCCTGGCTGGACGGCTGACGGGAGCAGGGACCGCCGCCGCCCAGGTGCCACACCCAGGTACCGCCCGCCCGCGCGAGAGCCGGGCAGGTGGGCCGCGGATGCTCCCAGAGGCCGGCCCAGCAGAGCGATGGACTTGGACAGGCTAAGATGGAAGTGACCTGAG…
1177	hsa_circ_0047038	chr18:13278103-13438383	-4697594805	0.014011194	LDLRAD4	ENSG00000168675	hsa_circC18orf1_006	+	647	ANNOTATED, CDS, coding, INTERNAL, OVCODE, OVERLAPTX, OVEXON, UTR5	0.142978255544648	NA	chr18_68005684_68106691_+	hsa-miR-4767:330.00, hsa-miR-2277-5p:327.00, hsa-miR-6737-3p:320.00, hsa-miR-5008-3p:306.00, hsa-miR-6813-5p:167.00	CGGTTCAAGCTCTACGTTCGTGACATCAAACCTCCTGTTGGGCCATTTCCGAGAACTCCCATCAGTTTCTGTATAGTGTAAAAGTTTCAGAGGCGGAGCACAGAGAGCTGCGGCTGGGACAAGGAGCACCCGCGTGCAGGTGCGACCCTGCAGGATGCTGGCAGCGGCGTGGCCAGGGGCGCCCGTGTTCTGAGGGCCTGAGGGCCAGCCCCTCCACCCGCGCCATGGCCTCCGCGCCCTGGCTGGACGGCTGACGGGAGCAGGGACCGCCGCCGCCCAGGTGCCACACCCAGGTACCGCCCGCCCGCGCGAGAGCCGGGCAGGTGGGCCGCGGATGCTCCCAGAGGCCGGCCCAGCAGAGCGATGGACTTGGACAGGCTAAGATGGAAGTGACCTGAG…
0	hsa_circ_0000834	chr18:13387339-13387761	-5365994843	0.012076138	LDLRAD4	ENSG00000168675	hsa_circC18orf1_010	+	422	ANNOTATED, CDS, coding, INTERNAL, UTR5	0.0719697002030033	NA	NA	hsa-miR-4767:330.00, hsa-miR-2277-5p:327.00, hsa-miR-6737-3p:320.00, hsa-miR-5008-3p:306.00, hsa-miR-6813-5p:167.00	TTTCAGAGGCGGAGCACAGAGAGCTGCGGCTGGGACAAGGAGCACCCGCGTGCAGGTGCGACCCTGCAGGATGCTGGCAGCGGCGTGGCCAGGGGCGCCCGTGTTCTGAGGGCCTGAGGGCCAGCCCCTCCACCCGCGCCATGGCCTCCGCGCCCTGGCTGGACGGCTGACGGGAGCAGGGACCGCCGCCGCCCAGGTGCCACACCCAGGTACCGCCCGCCCGCGCGAGAGCCGGGCAGGTGGGCCGCGGATGCTCCCAGAGGCCGGCCCAGCAGAGCGATGGACTTGGACAGGCTAAGATGGAAGTGACCTGAGCCTCGCCCGGCGGCTTCCTCGACGGGACAGCGCAAGAGTTGGAGCACAGGCTTGTCCGGGGAGCAGTATGCCGGAAGCTGGTTT…
0	hsa_circ_0047040	chr18:13387339-13438383	-4902682152	0.027697945	LDLRAD4	ENSG00000168675	hsa_circC18orf1_011	+	563	ANNOTATED, CDS, coding, INTERNAL, OVCODE, OVERLAPTX, OVEXON, UTR5	0.406505414547011	NA	NA	hsa-miR-4767:330.00, hsa-miR-2277-5p:327.00, hsa-miR-6737-3p:320.00, hsa-miR-5008-3p:306.00, hsa-miR-6813-5p:167.00	TTTCAGAGGCGGAGCACAGAGAGCTGCGGCTGGGACAAGGAGCACCCGCGTGCAGGTGCGACCCTGCAGGATGCTGGCAGCGGCGTGGCCAGGGGCGCCCGTGTTCTGAGGGCCTGAGGGCCAGCCCCTCCACCCGCGCCATGGCCTCCGCGCCCTGGCTGGACGGCTGACGGGAGCAGGGACCGCCGCCGCCCAGGTGCCACACCCAGGTACCGCCCGCCCGCGCGAGAGCCGGGCAGGTGGGCCGCGGATGCTCCCAGAGGCCGGCCCAGCAGAGCGATGGACTTGGACAGGCTAAGATGGAAGTGACCTGAGCCTCGCCCGGCGGCTTCCTCGACGGGACAGCGCAAGAGTTGGAGCACAGGCTTGTCCGGGGAGCAGTATGCCGGAAGCTGGTTT…
0	hsa_circ_0107984	chr18:14769341-14772227	-5405401861	0.048361617	ANKRD30B	ENSG00000180777	hsa_circANKRD30B_003	+	104	ANNOTATED, CDS, coding, INTERNAL, OVCODE, OVEXON	2.93863e-05	NA	NA	hsa-miR-4427:162.00, hsa-miR-7161-5p:159.00, hsa-miR-4693-5p:158.00, hsa-miR-548u:155.00, hsa-miR-493-5p:152.00	TGGATGTGAGTTCTGTAGAGCCTATATTCAGTCTTTTTGGCACACGGACTATTGAAAATTCACAGTGTACAAAAGTTGAGGAAGACTTTAATCTTGCTACCAAG
0	hsa_circ_0108003	chr18:18571136-18600200	-4642043296	0.036671369	ROCK1	ENSG00000067900	hsa_circROCK1_031	-	871	ANNOTATED, CDS, coding, INTERNAL, OVCODE, OVEXON	0.9967279	NA	NA	hsa-miR-627-3p:474.00, hsa-miR-9-5p:317.00, hsa-miR-6809-3p:166.00, hsa-miR-450b-5p:164.00, hsa-miR-21-5p:162.00	CAGGAAAGTTTGCAAAAAACAATCTATAAGCTGGAAGAACAGCTGCATAATGAAATGCAGTTAAAAGATGAAATGGAGCAGAAGTGCAGAACCTCAAACATAAAACTAGACAAGATAATGAAAGAATTGGATGAAGAGGGAAATCAAAGAAGAAATCTAGAATCTACAGTGTCTCAGATTGAGAAGGAGAAAATGTTGCTACAGCATAGAATTAATGAGTACCAAAGAAAAGCTGAACAGGAAAATGAGAAGAGAAGAAATGTAGAAAATGAAGTTTCTACATTAAAGGATCAGTTGGAAGACTTAAAGAAAGTCAGTCAGAATTCACAGCTTGCTAATGAGAAGCTGTCCCAGTTACAAAAGCAGCTAGAAGAAGCCAATGACTTACTTAGGACAGAA…
3586	hsa_circ_0000836	chr18:19345732-19399607	-275944583	0.045497306	MIB1	ENSG00000101752	hsa_circMIB1_012	+	1600	ANNOTATED, CDS, coding, INTERNAL, OVCODE, OVEXON	0.999999274073243	0.658291822	NA	hsa-miR-7161-3p:324.00, hsa-miR-4691-5p:319.00, hsa-miR-103a-3p:318.00, hsa-miR-107:318.00, hsa-miR-3614-5p:314.00	GCATCAAGCATGATGGAACCATGTGTGATACCTGCCGCCAGCAACCAATCATTGGCATTCGATGGAAGTGTGCAGAGTGTACAAATTATGATTTGTGCACAGTGTGTTATCATGGAGATAAACATCATTTAAGACATCGCTTTTACCGAATTACTACACCGGGAAGTGAGAGGGTTCTGTTAGAGTCTCGTAGGAAATCTAAGAAGATTACAGCCAGAGGAATCTTTGCAGGTGCCAGAGTGGTGCGAGGAGTGGACTGGCAGTGGGAAGATCAAGATGGAGGAAATGGACGTAGGGGAAAGGTAACAGAAATCCAGGACTGGAGTGCATCAAGCCCACATAGCGCAGCATATGTCCTCTGGGATAATGGTGCTAAGAACCTTTACAGAGTTGGCTTTG…
3586	hsa_circ_0000836	chr18:19345732-19399607	-320553295	0.04309945	MIB1	ENSG00000101752	hsa_circMIB1_012	+	1600	ANNOTATED, CDS, coding, INTERNAL, OVCODE, OVEXON	0.999999274073243	0.658291822	NA	hsa-miR-7161-3p:324.00, hsa-miR-4691-5p:319.00, hsa-miR-103a-3p:318.00, hsa-miR-107:318.00, hsa-miR-3614-5p:314.00	GCATCAAGCATGATGGAACCATGTGTGATACCTGCCGCCAGCAACCAATCATTGGCATTCGATGGAAGTGTGCAGAGTGTACAAATTATGATTTGTGCACAGTGTGTTATCATGGAGATAAACATCATTTAAGACATCGCTTTTACCGAATTACTACACCGGGAAGTGAGAGGGTTCTGTTAGAGTCTCGTAGGAAATCTAAGAAGATTACAGCCAGAGGAATCTTTGCAGGTGCCAGAGTGGTGCGAGGAGTGGACTGGCAGTGGGAAGATCAAGATGGAGGAAATGGACGTAGGGGAAAGGTAACAGAAATCCAGGACTGGAGTGCATCAAGCCCACATAGCGCAGCATATGTCCTCTGGGATAATGGTGCTAAGAACCTTTACAGAGTTGGCTTTG…
3125	hsa_circ_0000847	chr18:45391429-45423180	-3231967416	0.006359546	SMAD2	ENSG00000175387	hsa_circSMAD2_005	-	783	ANNOTATED, CDS, coding, INTERNAL, OVCODE, OVEXON, UTR5	0.999999999538985	0.230576099	chr18_76262439_76292984_+	hsa-miR-6875-3p:319.00, hsa-miR-3160-5p:311.00, hsa-miR-4691-5p:175.00, hsa-miR-548e-5p:174.00, hsa-miR-3174:172.00	GTTCGATACAAGAGGCTGTTTTCCTAGCGTGGCTTGCTGCCTTTGGTAAGAACATGTCGTCCATCTTGCCATTCACGCCGCCAGTTGTGAAGAGACTGCTGGGATGGAAGAAGTCAGCTGGTGGGTCTGGAGGAGCAGGCGGAGGAGAGCAGAATGGGCAGGAAGAAAAGTGGTGTGAGAAAGCAGTGAAAAGTCTGGTGAAGAAGCTAAAGAAAACAGGACGATTAGATGAGCTTGAGAAAGCCATCACCACTCAAAACTGTAATACTAAATGTGTTACCATACCAAGCACTTGCTCTGAAATTTGGGGACTGAGTACACCAAATACGATAGATCAGTGGGATACAACAGGCCTTTACAGCTTCTCTGAACAAACCAGGTCTCTTGATGGTCGTCTCC…
3125	hsa_circ_0000847	chr18:45391429-45423180	-268321808	0.029977152	SMAD2	ENSG00000175387	hsa_circSMAD2_005	-	783	ANNOTATED, CDS, coding, INTERNAL, OVCODE, OVEXON, UTR5	0.999999999538985	0.230576099	chr18_76262439_76292984_+	hsa-miR-6875-3p:319.00, hsa-miR-3160-5p:311.00, hsa-miR-4691-5p:175.00, hsa-miR-548e-5p:174.00, hsa-miR-3174:172.00	GTTCGATACAAGAGGCTGTTTTCCTAGCGTGGCTTGCTGCCTTTGGTAAGAACATGTCGTCCATCTTGCCATTCACGCCGCCAGTTGTGAAGAGACTGCTGGGATGGAAGAAGTCAGCTGGTGGGTCTGGAGGAGCAGGCGGAGGAGAGCAGAATGGGCAGGAAGAAAAGTGGTGTGAGAAAGCAGTGAAAAGTCTGGTGAAGAAGCTAAAGAAAACAGGACGATTAGATGAGCTTGAGAAAGCCATCACCACTCAAAACTGTAATACTAAATGTGTTACCATACCAAGCACTTGCTCTGAAATTTGGGGACTGAGTACACCAAATACGATAGATCAGTGGGATACAACAGGCCTTTACAGCTTCTCTGAACAAACCAGGTCTCTTGATGGTCGTCTCC…
4228	hsa_circ_0000825	chr18:8718421-8720494	-4891958277	1.43e-05	SOGA2	ENSG00000168502	hsa_circCCDC165_006	+	384	ANNOTATED, CDS, coding, INTERNAL, OVCODE, OVEXON, UTR5	0.999995089196069	0.193204429	NA	hsa-miR-340-3p:177.00, hsa-miR-30a-5p:168.00, hsa-miR-4724-3p:166.00, hsa-miR-145-5p:165.00, hsa-miR-30b-5p:164.00, hsa-miR-30e-5p:164.00, hsa-miR-4418:164.00	GATGAGTTAGATGAACTCCGTGCTGAGATGGAAGAGATGAGAGACAGTTATTTAGAGGAAGATGTTTACCAGCTGCAGGAACTTCGGCGAGAACTGGACCGCGCTAATAAAAACTGCCGAATCCTGCAGTACCGTCTTCGGAAAGCCGAGCAGAAAAGCCTGAAAGTGGCTGAGACGGGTCAGGTGGATGGTGAGCTTATTCGAAGCCTGGAGCAGGACTTGAAGGTAGCCAAAGATGTATCTGTCAGATTGCACCACGAACTTAAGACGGTGGAGGAAAAGCGCGCTAAAGCTGAGGATGAAAACGAAACTCTCCGACAGCAGATGATTGAAGTGGAAATATCCAAACAGGCCCTCCAGAATGAGCTGGAGAGACTGAAAGAG
7263	hsa_circ_0007509	chr18:9583114-9595151	-2423767264	0.029844828	PPP4R1	ENSG00000154845	hsa_circPPP4R1_012	-	866	ANNOTATED, CDS, coding, INTERNAL, OVCODE, OVEXON	0.989752378961477	0.113814238	chr17_65803159_65814464_+	hsa-miR-5004-5p:173.00, hsa-miR-181b-2-3p:169.00, hsa-miR-519e-5p:169.00, hsa-miR-8060:169.00, hsa-miR-548s:167.00	TTGGTGTGGATGACTACAGCTCAGAGTCTGATGTGATTATTATACCTTCAGCCCTGGACTTTGTCTCACAAGATGAAATGTTGACGCCCCTGGGGAGATTGGACAAGTATGCTGCAAGTGAGAACATATTTAACAGACAAATGGTGGCCCGGAGTTTGCTCGATACCTTGAGGGAAGTCTGCGATGATGAAAGAGATTGTATTGCTGTTTTGGAAAGAATTAGCAGATTGGCCGATGATTCAGAACCAACTGTGAGAGCGGAGCTGATGGAACAGGTGCCTCACATCGCACTGTTTTGTCAAGAAAACCGGCCTTCAATACCATATGCTTTTTCAAAATTCTTACTACCTATTGTGGTTAGATACCTTGCAGATCAGAATAATCAGGTGAGGAAAACAA…
0	hsa_circ_0002185	chr19:4950622-4951008	-4733648279	0.027636042	UHRF1	ENSG00000034063	hsa_circUHRF1_013	+	301	ANNOTATED, CDS, coding, INTERNAL, OVCODE, OVEXON	0.0176138624958733	NA	chr17_56317990_56318384_+	hsa-miR-6895-5p:162.00, hsa-miR-4667-3p:161.00, hsa-miR-3127-3p:160.00, hsa-miR-484:160.00, hsa-miR-1910-5p:158.00, hsa-miR-212-5p:158.00, hsa-miR-26a-1-3p:158.00	GGCGCTGGCTCTCAACTGCTTTGCTCCCATCAATGACCAAGAAGGGGCCGAGGCCAAGGACTGGCGGTCGGGGAAGCCGGTCAGGGTGGTGCGCAATGTCAAGGGTGGCAAGAATAGCAAGTACGCCCCCGCTGAGGGCAACCGCTACGATGGCATCTACAAGGTTGTGAAATACTGGCCCGAGAAGGGGAAGTCCGGGTTTCTCGTGTGGCGCTACCTTCTGCGGAGGGACGATGATGAGCCTGGCCCTTGGACGAAGGAGGGGAAGGACCGGATCAAGAAGCTGGGGCTGACCATGCAG
0	hsa_circ_0002185	chr19:4950622-4951008	-4021072767	0.042141013	UHRF1	ENSG00000034063	hsa_circUHRF1_013	+	301	ANNOTATED, CDS, coding, INTERNAL, OVCODE, OVEXON	0.0176138624958733	NA	chr17_56317990_56318384_+	hsa-miR-6895-5p:162.00, hsa-miR-4667-3p:161.00, hsa-miR-3127-3p:160.00, hsa-miR-484:160.00, hsa-miR-1910-5p:158.00, hsa-miR-212-5p:158.00, hsa-miR-26a-1-3p:158.00	GGCGCTGGCTCTCAACTGCTTTGCTCCCATCAATGACCAAGAAGGGGCCGAGGCCAAGGACTGGCGGTCGGGGAAGCCGGTCAGGGTGGTGCGCAATGTCAAGGGTGGCAAGAATAGCAAGTACGCCCCCGCTGAGGGCAACCGCTACGATGGCATCTACAAGGTTGTGAAATACTGGCCCGAGAAGGGGAAGTCCGGGTTTCTCGTGTGGCGCTACCTTCTGCGGAGGGACGATGATGAGCCTGGCCCTTGGACGAAGGAGGGGAAGGACCGGATCAAGAAGCTGGGGCTGACCATGCAG
0	hsa_circ_0002185	chr19:4950622-4951008	-4429060619	0.013213782	UHRF1	ENSG00000034063	hsa_circUHRF1_013	+	301	ANNOTATED, CDS, coding, INTERNAL, OVCODE, OVEXON	0.0176138624958733	NA	chr17_56317990_56318384_+	hsa-miR-6895-5p:162.00, hsa-miR-4667-3p:161.00, hsa-miR-3127-3p:160.00, hsa-miR-484:160.00, hsa-miR-1910-5p:158.00, hsa-miR-212-5p:158.00, hsa-miR-26a-1-3p:158.00	GGCGCTGGCTCTCAACTGCTTTGCTCCCATCAATGACCAAGAAGGGGCCGAGGCCAAGGACTGGCGGTCGGGGAAGCCGGTCAGGGTGGTGCGCAATGTCAAGGGTGGCAAGAATAGCAAGTACGCCCCCGCTGAGGGCAACCGCTACGATGGCATCTACAAGGTTGTGAAATACTGGCCCGAGAAGGGGAAGTCCGGGTTTCTCGTGTGGCGCTACCTTCTGCGGAGGGACGATGATGAGCCTGGCCCTTGGACGAAGGAGGGGAAGGACCGGATCAAGAAGCTGGGGCTGACCATGCAG
0	hsa_circ_0002185	chr19:4950622-4951008	-5279514706	0.005604391	UHRF1	ENSG00000034063	hsa_circUHRF1_013	+	301	ANNOTATED, CDS, coding, INTERNAL, OVCODE, OVEXON	0.0176138624958733	NA	chr17_56317990_56318384_+	hsa-miR-6895-5p:162.00, hsa-miR-4667-3p:161.00, hsa-miR-3127-3p:160.00, hsa-miR-484:160.00, hsa-miR-1910-5p:158.00, hsa-miR-212-5p:158.00, hsa-miR-26a-1-3p:158.00	GGCGCTGGCTCTCAACTGCTTTGCTCCCATCAATGACCAAGAAGGGGCCGAGGCCAAGGACTGGCGGTCGGGGAAGCCGGTCAGGGTGGTGCGCAATGTCAAGGGTGGCAAGAATAGCAAGTACGCCCCCGCTGAGGGCAACCGCTACGATGGCATCTACAAGGTTGTGAAATACTGGCCCGAGAAGGGGAAGTCCGGGTTTCTCGTGTGGCGCTACCTTCTGCGGAGGGACGATGATGAGCCTGGCCCTTGGACGAAGGAGGGGAAGGACCGGATCAAGAAGCTGGGGCTGACCATGCAG
2665	hsa_circ_0052318	chr19:58436990-58439415	-3619584928	0.009465421	ZNF418	ENSG00000196724	hsa_circZNF418_010	-	2425	ANNOTATED, CDS, coding, INTERNAL, OVCODE, OVEXON, UTR3	0.999999895998404	0.562232159	NA	hsa-miR-199b-5p:789.00, hsa-miR-181b-5p:654.00, hsa-miR-181d-5p:638.00, hsa-miR-3692-3p:630.00, hsa-miR-3142:620.00	GTTGTTGGTGTGGATCAGAAGATGAGGAGGCACCTTCTAAGAAGAGCATTTCTATACAAAGAGTGTCTCAGGTCAGCACTCCTGGGGCAGGTGTGTCTCCCAAGAAGGCCCACTCTTGTGAAATGTGTGGCGCGATCTTGGGAGACATTTTGCACTTGGCAGATCATCAGGGGACACATCACAAGCAGAAACTGCACAGGTGTGAGGCATGGGGGAATAAATTGTATGATAGTTCAAACCGTCCGCACCAGAATCAGTACCTTGGAGAGAAACCCTATAGAAGCAGTGTTGAGGAAGCATTGTTTGTGAAGAGGTGTAAGTTCCATGTGTCAGAGGAGTCATCTATCTTCATTCAGAGTGGAAAGGACTTTTTGCCCAGCTCAGGATTACTGCTGCAGG…
2574	hsa_circ_0000976	chr2:10559859-10560261	-3145730616	0.037590317	HPCAL1	ENSG00000115756	hsa_circHPCAL1_008	+	402	ANNOTATED, CDS, coding, INTERNAL, OVCODE, OVEXON, UTR5	0.998555118051842	NA	NA	hsa-miR-6770-3p:317.00, hsa-miR-370-5p:162.00, hsa-miR-639:161.00, hsa-miR-4725-3p:160.00, hsa-miR-6828-3p:160.00	GTGTAGTCGCCGCCGCCAGCCGCCATGGGCAAACAGAACAGCAAGCTGCGGCCCGAGGTGCTGCAGGACCTGCGGGAGAACACGGAGTTCACCGACCACGAGCTGCAGGAGTGGTACAAGGGCTTCCTCAAGGACTGCCCCACCGGCCACCTGACCGTGGACGAGTTCAAGAAGATCTACGCCAACTTCTTCCCCTACGGCGACGCTTCCAAGTTCGCCGAGCACGTCTTCCGCACCTTCGACACCAACGGCGACGGCACCATCGACTTCCGGGAGTTCATCATTGCGCTGAGCGTGACCTCGCGGGGCAAGCTGGAGCAGAAGCTCAAGTGGGCCTTCAGCATGTACGACCTGGACGGCAACGGCTACATCAGCCGCAGCGAGATGCTGGAGATCGTG…
3291	hsa_circ_0055945	chr2:106739425-106782539	-2694998348	0.015680882	UXS1	ENSG00000115652	hsa_circUXS1_005	-	650	ANNOTATED, CDS, coding, INTERNAL, OVCODE, OVEXON	0.989425817953212	NA	NA	hsa-miR-29a-5p:166.00, hsa-miR-4762-3p:166.00, hsa-miR-7847-3p:165.00, hsa-miR-3652:164.00, hsa-miR-1282:163.00, hsa-miR-5004-3p:163.00	CTGTTTGGGGCAACTTCGTTAATATGAGGTCTATCCAGGAAAATGGTGAACTAAAAATTGAAAGCAAGATTGAAGAGATGGTTGAACCACTAAGAGAGAAAATCAGAGATTTAGAAAAAAGCTTTACCCAGAAATACCCACCAGTAAAGTTTTTATCAGAAAAGGATCGGAAAAGAATTTTGATAACAGGAGGCGCAGGGTTCGTGGGCTCCCATCTAACTGACAAACTCATGATGGACGGCCACGAGGTGACCGTGGTGGACAATTTCTTCACGGGCAGGAAGAGAAACGTGGAGCACTGGATCGGACATGAGAACTTCGAGTTGATTAACCACGACGTGGTGGAGCCCCTCTACATCGAGGTTGACCAGATATACCATCTGGCATCTCCAGCCTCCC…
3291	hsa_circ_0055945	chr2:106739425-106782539	-3377911925	0.007479878	UXS1	ENSG00000115652	hsa_circUXS1_005	-	650	ANNOTATED, CDS, coding, INTERNAL, OVCODE, OVEXON	0.989425817953212	NA	NA	hsa-miR-29a-5p:166.00, hsa-miR-4762-3p:166.00, hsa-miR-7847-3p:165.00, hsa-miR-3652:164.00, hsa-miR-1282:163.00, hsa-miR-5004-3p:163.00	CTGTTTGGGGCAACTTCGTTAATATGAGGTCTATCCAGGAAAATGGTGAACTAAAAATTGAAAGCAAGATTGAAGAGATGGTTGAACCACTAAGAGAGAAAATCAGAGATTTAGAAAAAAGCTTTACCCAGAAATACCCACCAGTAAAGTTTTTATCAGAAAAGGATCGGAAAAGAATTTTGATAACAGGAGGCGCAGGGTTCGTGGGCTCCCATCTAACTGACAAACTCATGATGGACGGCCACGAGGTGACCGTGGTGGACAATTTCTTCACGGGCAGGAAGAGAAACGTGGAGCACTGGATCGGACATGAGAACTTCGAGTTGATTAACCACGACGTGGTGGAGCCCCTCTACATCGAGGTTGACCAGATATACCATCTGGCATCTCCAGCCTCCC…
3291	hsa_circ_0055945	chr2:106739425-106782539	-2723897795	0.037674672	UXS1	ENSG00000115652	hsa_circUXS1_005	-	650	ANNOTATED, CDS, coding, INTERNAL, OVCODE, OVEXON	0.989425817953212	NA	NA	hsa-miR-29a-5p:166.00, hsa-miR-4762-3p:166.00, hsa-miR-7847-3p:165.00, hsa-miR-3652:164.00, hsa-miR-1282:163.00, hsa-miR-5004-3p:163.00	CTGTTTGGGGCAACTTCGTTAATATGAGGTCTATCCAGGAAAATGGTGAACTAAAAATTGAAAGCAAGATTGAAGAGATGGTTGAACCACTAAGAGAGAAAATCAGAGATTTAGAAAAAAGCTTTACCCAGAAATACCCACCAGTAAAGTTTTTATCAGAAAAGGATCGGAAAAGAATTTTGATAACAGGAGGCGCAGGGTTCGTGGGCTCCCATCTAACTGACAAACTCATGATGGACGGCCACGAGGTGACCGTGGTGGACAATTTCTTCACGGGCAGGAAGAGAAACGTGGAGCACTGGATCGGACATGAGAACTTCGAGTTGATTAACCACGACGTGGTGGAGCCCCTCTACATCGAGGTTGACCAGATATACCATCTGGCATCTCCAGCCTCCC…
0	hsa_circ_0117669	chr2:153431649-153437563	-4454990992	0.043256342	FMNL2	ENSG00000157827	hsa_circFMNL2_017	+	280	ANNOTATED, CDS, coding, INTERNAL, OVCODE, OVEXON	0.08690944	NA	chr2_53068501_53073733_+	hsa-miR-101-5p:178.00, hsa-miR-301a-3p:167.00, hsa-miR-301b-3p:167.00, hsa-miR-454-3p:164.00, hsa-miR-3912-3p:163.00	ATATAATACATTGCCAAGCAGAAGAACTCTGAAAAATTCAAGATTAGTGAGTAAGAAAGATGATGTGCATGTCTGTATCATGTGTTTACGTGCCATCATGAATTATCAGTATGGTTTCAACATGGTCATGTCTCATCCACACGCTGTCAATGAGATTGCACTAAGCCTGAACAACAAGAATCCCAGAACAAAAGCCCTTGTCTTAGAACTGTTGGCAGCCGTTTGTCTTGTCAGAGGCGGGCATGAAATCATTTTATCAGCATTTGATAACTTTAAAGAG
0	hsa_circ_0003279	chr2:168920009-168931741	-5908180309	0.000988679	STK39	ENSG00000198648	hsa_circSTK39_026	-	287	ANNOTATED, CDS, coding, INTERNAL, OVCODE, OVEXON	0.240413401138563	NA	NA	hsa-miR-7976:165.00, hsa-miR-6758-5p:161.00, hsa-miR-6756-5p:160.00, hsa-miR-1304-3p:159.00, hsa-miR-608:158.00	GTAAGAAGAGTTCCTGGGTCAAGTGGTCACCTTCATAAAACCGAAGACGGGGACTGGGAGTGGAGTGACGACGAGATGGATGAGAAGAGCGAAGAAGGGAAAGCAGCTTTTTCTCAGGAAAAGTCACGAAGAGTAAAAGAAGAAAATCCAGAGATTGCAGTGAGTGCCAGCACCATCCCCGAACAAATACAGTCCCTCTCTGTGCACGACTCTCAGGGCCCACCCAATGCTAATGAAGACTACAGAGAAGCTTCTTCTTGTGCCGTGAACCTCGTTTTGAGATTAAG
1563	hsa_circ_0005882	chr2:168920009-168986268	-500717519	0.001093173	STK39	ENSG00000198648	hsa_circSTK39_023	-	402	ANNOTATED, CDS, coding, INTERNAL, OVCODE, OVEXON	0.999741115343574	0.99227391	NA	hsa-miR-6874-3p:168.00, hsa-miR-7976:165.00, hsa-miR-6758-5p:161.00, hsa-miR-6756-5p:160.00, hsa-miR-1304-3p:159.00, hsa-miR-4677-5p:159.00	GCCCACAGCAGCAGAACTTTTAAAATGCAAATTCTTCCAGAAAGCCAAGAACAGAGAGTACCTGATTGAGAAGCTGCTTACAAGAACACCAGACATAGCCCAAAGAGCCAAAAAGGTAAGAAGAGTTCCTGGGTCAAGTGGTCACCTTCATAAAACCGAAGACGGGGACTGGGAGTGGAGTGACGACGAGATGGATGAGAAGAGCGAAGAAGGGAAAGCAGCTTTTTCTCAGGAAAAGTCACGAAGAGTAAAAGAAGAAAATCCAGAGATTGCAGTGAGTGCCAGCACCATCCCCGAACAAATACAGTCCCTCTCTGTGCACGACTCTCAGGGCCCACCCAATGCTAATGAAGACTACAGAGAAGCTTCTTCTTGTGCCGTGAACCTCGTTTTGAGATT…
1563	hsa_circ_0005882	chr2:168920009-168986268	-36392743	0.030783647	STK39	ENSG00000198648	hsa_circSTK39_023	-	402	ANNOTATED, CDS, coding, INTERNAL, OVCODE, OVEXON	0.999741115343574	0.99227391	NA	hsa-miR-6874-3p:168.00, hsa-miR-7976:165.00, hsa-miR-6758-5p:161.00, hsa-miR-6756-5p:160.00, hsa-miR-1304-3p:159.00, hsa-miR-4677-5p:159.00	GCCCACAGCAGCAGAACTTTTAAAATGCAAATTCTTCCAGAAAGCCAAGAACAGAGAGTACCTGATTGAGAAGCTGCTTACAAGAACACCAGACATAGCCCAAAGAGCCAAAAAGGTAAGAAGAGTTCCTGGGTCAAGTGGTCACCTTCATAAAACCGAAGACGGGGACTGGGAGTGGAGTGACGACGAGATGGATGAGAAGAGCGAAGAAGGGAAAGCAGCTTTTTCTCAGGAAAAGTCACGAAGAGTAAAAGAAGAAAATCCAGAGATTGCAGTGAGTGCCAGCACCATCCCCGAACAAATACAGTCCCTCTCTGTGCACGACTCTCAGGGCCCACCCAATGCTAATGAAGACTACAGAGAAGCTTCTTCTTGTGCCGTGAACCTCGTTTTGAGATT…
5019	hsa_circ_0003296	chr2:168986050-168997268	-3507888146	0.00077622	STK39	ENSG00000198648	hsa_circSTK39_019	-	461	ANNOTATED, CDS, coding, INTERNAL, OVCODE, OVEXON	0.467308353784651	NA	NA	hsa-miR-367-5p:319.00, hsa-miR-6874-3p:173.00, hsa-miR-1266-3p:172.00, hsa-miR-363-5p:171.00, hsa-miR-4635:164.00	ATTTTGGGGTAAGTGCGTTCCTAGCAACAGGGGGTGATGTTACCCGAAATAAAGTAAGAAAAACATTCGTTGGCACCCCATGTTGGATGGCTCCTGAAGTCATGGAACAGGTGAGAGGCTATGACTTCAAGGCTGACATGTGGAGTTTTGGAATAACTGCCATTGAATTAGCAACAGGAGCAGCGCCTTATCACAAATATCCTCCCATGAAAGTGTTAATGTTGACTTTGCAAAATGATCCACCCACTTTGGAAACAGGGGTAGAGGATAAAGAAATGATGAAAAAGTACGGCAAGTCCTTTAGAAAATTACTTTCACTGTGTCTTCAGAAAGATCCTTCCAAAAGGCCCACAGCAGCAGAACTTTTAAAATGCAAATTCTTCCAGAAAGCCAAGAACA…
0	hsa_circ_0001078	chr2:168986050-169038600	-5546280673	0.003505718	STK39	ENSG00000198648	hsa_circSTK39_009	-	881	ANNOTATED, CDS, coding, INTERNAL	0.99555663829132	NA	NA	hsa-miR-367-5p:319.00, hsa-miR-136-5p:301.00, hsa-miR-6874-3p:173.00, hsa-miR-1266-3p:172.00, hsa-miR-363-5p:171.00	GCAGTGGAGCTACTGCTGTGGTTCAGGCAGCCCTATGCAAACCCAGGCAAGAACGTGTAGCAATAAAACGGATCAACTTGGAAAAATGCCAGACCAGTATGGATGAACTATTAAAAGAAATTCAAGCCATGAGTCAGTGCAGCCATCCCAACGTAGTGACCTATTACACCTCTTTTGTGGTCAAAGATGAACTTTGGCTGGTCATGAAATTACTAAGTGGAGGTTCAATGTTGGATATCATAAAATACATTGTCAACCGAGGAGAACACAAGAATGGAGTTCTGGAAGAGGCAATAATAGCAACAATTCTTAAAGAGGTTTTGGAAGGCTTAGACTATCTACACAGAAACGGTCAGATTCACAGGGATTTGAAAGCTGGTAATATTCTTCTGGGTGAGG…
0	hsa_circ_0002193	chr2:168994597-168997268	-5498744764	0.002936375	STK39	ENSG00000198648	hsa_circSTK39_018	-	346	ANNOTATED, CDS, coding, INTERNAL, OVCODE, OVEXON	0.0846860075966191	0.003200513	NA	hsa-miR-367-5p:319.00, hsa-miR-1266-3p:172.00, hsa-miR-363-5p:171.00, hsa-miR-4635:164.00, hsa-miR-335-3p:163.00	ATTTTGGGGTAAGTGCGTTCCTAGCAACAGGGGGTGATGTTACCCGAAATAAAGTAAGAAAAACATTCGTTGGCACCCCATGTTGGATGGCTCCTGAAGTCATGGAACAGGTGAGAGGCTATGACTTCAAGGCTGACATGTGGAGTTTTGGAATAACTGCCATTGAATTAGCAACAGGAGCAGCGCCTTATCACAAATATCCTCCCATGAAAGTGTTAATGTTGACTTTGCAAAATGATCCACCCACTTTGGAAACAGGGGTAGAGGATAAAGAAATGATGAAAAAGTACGGCAAGTCCTTTAGAAAATTACTTTCACTGTGTCTTCAGAAAGATCCTTCCAAAAG
0	hsa_circ_0003120	chr2:168994597-169023917	-4824905234	0.03010729	STK39	ENSG00000198648	hsa_circSTK39_012	-	653	ANNOTATED, CDS, coding, INTERNAL, OVCODE, OVEXON	0.936128834810885	NA	NA	hsa-miR-367-5p:319.00, hsa-miR-136-5p:301.00, hsa-miR-1266-3p:172.00, hsa-miR-363-5p:171.00, hsa-miR-4795-3p:170.00	AAAGAAATTCAAGCCATGAGTCAGTGCAGCCATCCCAACGTAGTGACCTATTACACCTCTTTTGTGGTCAAAGATGAACTTTGGCTGGTCATGAAATTACTAAGTGGAGGTTCAATGTTGGATATCATAAAATACATTGTCAACCGAGGAGAACACAAGAATGGAGTTCTGGAAGAGGCAATAATAGCAACAATTCTTAAAGAGGTTTTGGAAGGCTTAGACTATCTACACAGAAACGGTCAGATTCACAGGGATTTGAAAGCTGGTAATATTCTTCTGGGTGAGGATGGTTCAGTACAAATAGCAGATTTTGGGGTAAGTGCGTTCCTAGCAACAGGGGGTGATGTTACCCGAAATAAAGTAAGAAAAACATTCGTTGGCACCCCATGTTGGATGGCT…
2905	hsa_circ_0002029	chr2:168994597-169038600	-4334916496	0.000727299	STK39	ENSG00000198648	hsa_circSTK39_008	-	766	ANNOTATED, CDS, coding, INTERNAL, OVCODE, OVEXON	0.978061442702672	0.391045162	NA	hsa-miR-367-5p:319.00, hsa-miR-136-5p:301.00, hsa-miR-1266-3p:172.00, hsa-miR-363-5p:171.00, hsa-miR-4795-3p:170.00	GCAGTGGAGCTACTGCTGTGGTTCAGGCAGCCCTATGCAAACCCAGGCAAGAACGTGTAGCAATAAAACGGATCAACTTGGAAAAATGCCAGACCAGTATGGATGAACTATTAAAAGAAATTCAAGCCATGAGTCAGTGCAGCCATCCCAACGTAGTGACCTATTACACCTCTTTTGTGGTCAAAGATGAACTTTGGCTGGTCATGAAATTACTAAGTGGAGGTTCAATGTTGGATATCATAAAATACATTGTCAACCGAGGAGAACACAAGAATGGAGTTCTGGAAGAGGCAATAATAGCAACAATTCTTAAAGAGGTTTTGGAAGGCTTAGACTATCTACACAGAAACGGTCAGATTCACAGGGATTTGAAAGCTGGTAATATTCTTCTGGGTGAGG…
1654	hsa_circ_0007082	chr2:169018296-169023917	-3455445096	0.041385727	STK39	ENSG00000198648	hsa_circSTK39_011	-	307	ANNOTATED, CDS, coding, INTERNAL, OVCODE, OVEXON	0.411958794771039	NA	chr2_68390913_68398532_-	hsa-miR-136-5p:301.00, hsa-miR-4795-3p:170.00, hsa-miR-647:168.00, hsa-miR-581:161.00, hsa-miR-2682-3p:159.00, hsa-miR-92a-1-5p:159.00	AAAGAAATTCAAGCCATGAGTCAGTGCAGCCATCCCAACGTAGTGACCTATTACACCTCTTTTGTGGTCAAAGATGAACTTTGGCTGGTCATGAAATTACTAAGTGGAGGTTCAATGTTGGATATCATAAAATACATTGTCAACCGAGGAGAACACAAGAATGGAGTTCTGGAAGAGGCAATAATAGCAACAATTCTTAAAGAGGTTTTGGAAGGCTTAGACTATCTACACAGAAACGGTCAGATTCACAGGGATTTGAAAGCTGGTAATATTCTTCTGGGTGAGGATGGTTCAGTACAAATAGCAG
10054	hsa_circ_0001079	chr2:169018296-169038600	-2809760358	0.001564131	STK39	ENSG00000198648	hsa_circSTK39_007	-	420	ANNOTATED, CDS, coding, INTERNAL, OVCODE, OVEXON	0.999905777257844	0.176312483	NA	hsa-miR-136-5p:301.00, hsa-miR-4795-3p:170.00, hsa-miR-647:168.00, hsa-miR-140-3p:166.00, hsa-miR-581:161.00	GCAGTGGAGCTACTGCTGTGGTTCAGGCAGCCCTATGCAAACCCAGGCAAGAACGTGTAGCAATAAAACGGATCAACTTGGAAAAATGCCAGACCAGTATGGATGAACTATTAAAAGAAATTCAAGCCATGAGTCAGTGCAGCCATCCCAACGTAGTGACCTATTACACCTCTTTTGTGGTCAAAGATGAACTTTGGCTGGTCATGAAATTACTAAGTGGAGGTTCAATGTTGGATATCATAAAATACATTGTCAACCGAGGAGAACACAAGAATGGAGTTCTGGAAGAGGCAATAATAGCAACAATTCTTAAAGAGGTTTTGGAAGGCTTAGACTATCTACACAGAAACGGTCAGATTCACAGGGATTTGAAAGCTGGTAATATTCTTCTGGGTGAGG…
1563	hsa_circ_0002999	chr2:215617170-215661841	-4409268755	0.011840874	BARD1	ENSG00000138376	hsa_circBARD1_004	-	1519	ANNOTATED, CDS, coding, INTERNAL, OVCODE, OVEXON	0.999994114053101	0.988391715	NA	hsa-miR-153-5p:311.00, hsa-miR-544a:304.00, hsa-miR-4452:301.00, hsa-miR-4742-5p:176.00, hsa-miR-892c-3p:166.00	TACTAACATTCTGAGAGAGCCTGTGTGTTTAGGAGGATGTGAGCACATCTTCTGTAGTAATTGTGTAAGTGACTGCATTGGAACTGGATGTCCAGTGTGTTACACCCCGGCCTGGATACAAGACTTGAAGATAAATAGACAACTGGACAGCATGATTCAACTTTGTAGTAAGCTTCGAAATTTGCTACATGACAATGAGCTGTCAGATTTGAAAGAAGATAAACCTAGGAAAAGTTTGTTTAATGATGCAGGAAACAAGAAGAATTCAATTAAAATGTGGTTTAGCCCTCGAAGTAAGAAAGTCAGATATGTTGTGAGTAAAGCTTCAGTGCAAACCCAGCCTGCAATAAAAAAAGATGCAAGTGCTCAGCAAGACTCATATGAATTTGTTTCCCCAAG…
1563	hsa_circ_0002999	chr2:215617170-215661841	-3321973018	0.039373313	BARD1	ENSG00000138376	hsa_circBARD1_004	-	1519	ANNOTATED, CDS, coding, INTERNAL, OVCODE, OVEXON	0.999994114053101	0.988391715	NA	hsa-miR-153-5p:311.00, hsa-miR-544a:304.00, hsa-miR-4452:301.00, hsa-miR-4742-5p:176.00, hsa-miR-892c-3p:166.00	TACTAACATTCTGAGAGAGCCTGTGTGTTTAGGAGGATGTGAGCACATCTTCTGTAGTAATTGTGTAAGTGACTGCATTGGAACTGGATGTCCAGTGTGTTACACCCCGGCCTGGATACAAGACTTGAAGATAAATAGACAACTGGACAGCATGATTCAACTTTGTAGTAAGCTTCGAAATTTGCTACATGACAATGAGCTGTCAGATTTGAAAGAAGATAAACCTAGGAAAAGTTTGTTTAATGATGCAGGAAACAAGAAGAATTCAATTAAAATGTGGTTTAGCCCTCGAAGTAAGAAAGTCAGATATGTTGTGAGTAAAGCTTCAGTGCAAACCCAGCCTGCAATAAAAAAAGATGCAAGTGCTCAGCAAGACTCATATGAATTTGTTTCCCCAAG…
2.74	hsa_circ_0001098	chr2:215632205-215646233	-5532061482	1.43e-05	BARD1	ENSG00000138376	hsa_circBARD1_018	-	1204	ANNOTATED, CDS, coding, INTERNAL	0.99983047589413	0.995747391	NA	hsa-miR-153-5p:311.00, hsa-miR-544a:304.00, hsa-miR-4452:301.00, hsa-miR-4742-5p:176.00, hsa-miR-892c-3p:166.00	ATTTGAAAGAAGATAAACCTAGGAAAAGTTTGTTTAATGATGCAGGAAACAAGAAGAATTCAATTAAAATGTGGTTTAGCCCTCGAAGTAAGAAAGTCAGATATGTTGTGAGTAAAGCTTCAGTGCAAACCCAGCCTGCAATAAAAAAAGATGCAAGTGCTCAGCAAGACTCATATGAATTTGTTTCCCCAAGTCCTCCTGCAGATGTTTCTGAGAGGGCTAAAAAGGCTTCTGCAAGATCTGGAAAAAAGCAAAAAAAGAAAACTTTAGCTGAAATCAACCAAAAATGGAATTTAGAGGCAGAAAAAGAAGATGGTGAATTTGACTCCAAAGAGGAATCTAAGCAAAAGCTGGTATCCTTCTGTAGCCAACCATCTGTTATCTCCAGTCCTCAGATAA…
2.74	hsa_circ_0001098	chr2:215632205-215646233	-4651433751	0.000828239	BARD1	ENSG00000138376	hsa_circBARD1_018	-	1204	ANNOTATED, CDS, coding, INTERNAL	0.99983047589413	0.995747391	NA	hsa-miR-153-5p:311.00, hsa-miR-544a:304.00, hsa-miR-4452:301.00, hsa-miR-4742-5p:176.00, hsa-miR-892c-3p:166.00	ATTTGAAAGAAGATAAACCTAGGAAAAGTTTGTTTAATGATGCAGGAAACAAGAAGAATTCAATTAAAATGTGGTTTAGCCCTCGAAGTAAGAAAGTCAGATATGTTGTGAGTAAAGCTTCAGTGCAAACCCAGCCTGCAATAAAAAAAGATGCAAGTGCTCAGCAAGACTCATATGAATTTGTTTCCCCAAGTCCTCCTGCAGATGTTTCTGAGAGGGCTAAAAAGGCTTCTGCAAGATCTGGAAAAAAGCAAAAAAAGAAAACTTTAGCTGAAATCAACCAAAAATGGAATTTAGAGGCAGAAAAAGAAGATGGTGAATTTGACTCCAAAGAGGAATCTAAGCAAAAGCTGGTATCCTTCTGTAGCCAACCATCTGTTATCTCCAGTCCTCAGATAA…
2.74	hsa_circ_0001098	chr2:215632205-215646233	-4315440646	0.000276286	BARD1	ENSG00000138376	hsa_circBARD1_018	-	1204	ANNOTATED, CDS, coding, INTERNAL	0.99983047589413	0.995747391	NA	hsa-miR-153-5p:311.00, hsa-miR-544a:304.00, hsa-miR-4452:301.00, hsa-miR-4742-5p:176.00, hsa-miR-892c-3p:166.00	ATTTGAAAGAAGATAAACCTAGGAAAAGTTTGTTTAATGATGCAGGAAACAAGAAGAATTCAATTAAAATGTGGTTTAGCCCTCGAAGTAAGAAAGTCAGATATGTTGTGAGTAAAGCTTCAGTGCAAACCCAGCCTGCAATAAAAAAAGATGCAAGTGCTCAGCAAGACTCATATGAATTTGTTTCCCCAAGTCCTCCTGCAGATGTTTCTGAGAGGGCTAAAAAGGCTTCTGCAAGATCTGGAAAAAAGCAAAAAAAGAAAACTTTAGCTGAAATCAACCAAAAATGGAATTTAGAGGCAGAAAAAGAAGATGGTGAATTTGACTCCAAAGAGGAATCTAAGCAAAAGCTGGTATCCTTCTGTAGCCAACCATCTGTTATCTCCAGTCCTCAGATAA…
3291	hsa_circ_0005050	chr2:61712902-61717911	-2757966346	0.032229272	XPO1	ENSG00000082898	hsa_circXPO1_092	-	621	ANNOTATED, CDS, coding, INTERNAL, OVCODE, OVEXON	0.999999862368768	0.001069119	NA	hsa-miR-892c-3p:307.00, hsa-miR-4676-3p:301.00, hsa-miR-146b-5p:172.00, hsa-miR-146a-5p:168.00, hsa-miR-3936:167.00	GTTCATACGTTTTATGAAGCTGTGGGGTACATGATTGGTGCACAAACAGATCAAACAGTACAAGAACACTTGATAGAAAAGTACATGTTACTCCCTAATCAAGTGTGGGATAGTATAATCCAGCAGGCAACCAAAAATGTGGATATACTGAAAGATCCTGAAACAGTCAAGCAGCTTGGTAGCATTTTGAAAACAAATGTGAGAGCCTGCAAAGCTGTTGGACACCCCTTTGTAATTCAGCTTGGAAGAATTTATTTAGATATGCTTAATGTATACAAGTGCCTCAGTGAAAATATTTCTGCAGCTATCCAAGCTAATGGTGAAATGGTTACAAAGCAACCATTGATTAGAAGTATGCGAACTGTAAAAAGGGAAACTTTAAAGTTAATATCTGGTTGG…
1012	hsa_circ_0004597	chr20:61485367-61488990	-5342763009	0.013501529	TCFL5	ENSG00000101190	hsa_circTCFL5_006	-	386	ANNOTATED, CDS, coding, INTERNAL, OVCODE, OVEXON	0.46452017153931	0.001063186	NA	hsa-miR-361-3p:172.00, hsa-miR-330-5p:171.00, hsa-miR-326:165.00, hsa-miR-7853-5p:164.00, hsa-miR-3131:162.00, hsa-miR-3667-3p:162.00	AAGCAGCGCTATGCAAACAAGCACTGAAGAGGAATCGGAGTAGAATGCGTCAGTTGGACACAAATGTAGAGCGAAGAGCCCTTGGAGAGATTCAGAATGTGGGCGAAGGTGCCACCGCCACACAAGGCGCTTGGCAGTCCTCGGAGTCCTCACAGGCAAACCTGGGGGAGCAGGCCCAGAGTGGGCCCCAGGGAGGAAGGTCTCAACGTAGGGAGAGGCATAACCGAATGGAAAGAGATAGAAGGCGCAGAATCCGCATTTGCTGTGATGAGTTGAATCTCTTAGTGCCGTTCTGCAATGCCGAGACTGACAAGGCCACAACTCTGCAGTGGACCACAGCATTCCTGAAATACATCCAGGAAAGACATGGAGATTCTCTTAAAAAG
0	hsa_circ_0006458	chr20:61488746-61490878	-7239933032	2.11e-05	TCFL5	ENSG00000101190	hsa_circTCFL5_004	-	407	ANNOTATED, CDS, coding, INTERNAL, OVCODE, OVEXON	0.184056985252682	NA	NA	hsa-miR-361-3p:172.00, hsa-miR-330-5p:171.00, hsa-miR-326:165.00, hsa-miR-338-5p:165.00, hsa-miR-3131:162.00, hsa-miR-3667-3p:162.00	AGTTCTAGTAACTCATGTTCTGTACTTGAAGCTGCCAAGCACCAGGATATTGGATTGCCTAGAGCATTTTCTTTCTGTTATCAGCAAGAAATTGAATCCACTAAACAGACGTTAGGTAGTAGAAACAAAGTTTTGCCTGAGCAAGTTTGGATTAAAGTGGGAGAAGCAGCGCTATGCAAACAAGCACTGAAGAGGAATCGGAGTAGAATGCGTCAGTTGGACACAAATGTAGAGCGAAGAGCCCTTGGAGAGATTCAGAATGTGGGCGAAGGTGCCACCGCCACACAAGGCGCTTGGCAGTCCTCGGAGTCCTCACAGGCAAACCTGGGGGAGCAGGCCCAGAGTGGGCCCCAGGGAGGAAGGTCTCAACGTAGGGAGAGGCATAACCGAATGGAAAGA…
4008	hsa_circ_0002805	chr20:62407030-62422143	-2918651565	0.008080639	ZBTB46	ENSG00000130584	hsa_circZBTB46_002	-	1255	ANNOTATED, CDS, coding, INTERNAL, OVCODE, OVEXON, UTR5	0.999999972894751	0.359749295	NA	hsa-miR-3619-5p:606.00, hsa-miR-3692-5p:473.00, hsa-miR-6728-3p:316.00, hsa-miR-4638-5p:311.00, hsa-miR-1204:310.00	AGTCTGTAGAAGAGGCGACACCAGGGCTTCCAAATGAACAACCGAAAGGAAGATATGGAAATCACGTCCCACTACCGGCACCTGCTGCGGGAGCTCAACGAGCAGAGGCAGCACGGCGTCCTGTGCGACGTCTGCGTGGTCGTGGAGGGCAAGGTCTTCAAGGCGCACAAGAACGTCCTGCTGGGCAGCAGCCGCTACTTCAAGACGCTCTACTGCCAGGTGCAGAAGACGTCGGAGCAGGCCACGGTCACGCACCTGGACATCGTCACGGCCCAGGGCTTCAAGGCCATCATCGACTTCATGTACTCAGCGCACCTGGCGCTCACCAGCAGGAACGTCATCGAGGTGATGTCAGCCGCCAGCTTCCTGCAGATGACGGACATCGTGCAAGCCTGCCAC…
4008	hsa_circ_0002805	chr20:62407030-62422143	-3354959662	0.014927433	ZBTB46	ENSG00000130584	hsa_circZBTB46_002	-	1255	ANNOTATED, CDS, coding, INTERNAL, OVCODE, OVEXON, UTR5	0.999999972894751	0.359749295	NA	hsa-miR-3619-5p:606.00, hsa-miR-3692-5p:473.00, hsa-miR-6728-3p:316.00, hsa-miR-4638-5p:311.00, hsa-miR-1204:310.00	AGTCTGTAGAAGAGGCGACACCAGGGCTTCCAAATGAACAACCGAAAGGAAGATATGGAAATCACGTCCCACTACCGGCACCTGCTGCGGGAGCTCAACGAGCAGAGGCAGCACGGCGTCCTGTGCGACGTCTGCGTGGTCGTGGAGGGCAAGGTCTTCAAGGCGCACAAGAACGTCCTGCTGGGCAGCAGCCGCTACTTCAAGACGCTCTACTGCCAGGTGCAGAAGACGTCGGAGCAGGCCACGGTCACGCACCTGGACATCGTCACGGCCCAGGGCTTCAAGGCCATCATCGACTTCATGTACTCAGCGCACCTGGCGCTCACCAGCAGGAACGTCATCGAGGTGATGTCAGCCGCCAGCTTCCTGCAGATGACGGACATCGTGCAAGCCTGCCAC…
7684	hsa_circ_0001181	chr21:30693541-30702014	-2038651153	0.008831014	BACH1	ENSG00000156273	hsa_circBACH1_008	+	1836	ANNOTATED, CDS, coding, INTERNAL, UTR5	0.999999769358795	0.648654837	NA	hsa-miR-152-5p:462.00, hsa-miR-6773-3p:319.00, hsa-miR-424-5p:313.00, hsa-miR-548aq-3p:313.00, hsa-miR-7107-3p:313.00	GTTGATGATAATTAGAAGCATGCTTTCCACTGAACTTCCCGACAACATTTGTTATGCAGAATGTCTCTGAGTGAGAACTCGGTTTTTGCCTATGAATCTTCTGTGCATAGCACCAATGTTTTACTCAGCCTTAATGACCAGCGGAAGAAAGATGTGCTGTGCGATGTCACCATCTTTGTGGAGGGACAGCGGTTCCGCGCTCACCGGTCCGTGCTGGCGGCATGCAGCAGTTACTTCCACTCAAGAATCGTAGGCCAGGCTGATGGAGAGCTGAACATTACTCTTCCAGAAGAGGTGACAGTTAAAGGATTTGAACCTTTAATTCAGTTTGCCTACACTGCTAAACTGATTTTAAGTAAAGAGAATGTGGATGAAGTGTGCAAATGTGTGGAGTTTTTA…
1563	hsa_circ_0061668	chr21:38480691-38519903	-3360615274	0.024256722	TTC3	ENSG00000182670	hsa_circTTC3_027	+	1171	ANNOTATED, CDS, coding, INTERNAL, OVCODE, OVEXON	0.9993657	NA	NA	hsa-miR-4753-3p:320.00, hsa-miR-5003-3p:313.00, hsa-miR-3606-3p:312.00, hsa-miR-3065-5p:308.00, hsa-miR-153-5p:307.00	AAATGCACTCGGTGATGGAAAGAGAGCCACTATTCTGAAGAACACTTGGCCAAAGGGTCATTATCGTTATTGTGATGCTCTTTCTATGCTGGGGGAATATGACTGGGCCCTGCAAGCAAACATAAAAGCTCAAAAACTCTGTAAAAATGACCCTGAGGGAATCAAGGATCTAATTCAGCAGCATGTAAAGTTACAAAAACAAATAGAAGACCTACAAGGTCGAACAGCAAATAAGGATCCAATTAAAGCCTTTTATGAAAACAGGGCCTACACACCTAGGAGTTTATCAGCACCTATATTTACTACTTCACTTAACTTTGTGGAGAAGGAAAGAGATTTCAGAAAAATTAATCACGAAATGGCCAACGGTGGTAATCAGAATCTAAAGGTGGCGGATGA…
23717	hsa_circ_0005037	chr21:46548316-46554747	-1969236755	0.029844828	ADARB1	ENSG00000197381	hsa_circADARB1_004	+	290	ANNOTATED, INTERNAL, ncRNA, OVEXON	0.416859175707455	0.05079496	NA	hsa-miR-615-5p:174.00, hsa-miR-6847-3p:164.00, hsa-miR-5581-3p:161.00, hsa-miR-4708-3p:159.00, hsa-miR-5691:159.00	AGTGGAGCCTTTCAGGCTGGCATGGAGAGCTTAAGGGGCAACTGAAGGAGACACACTGGCCAAGCGCGGAGTTCTGCTTACTTCAGTCCTGCTGAGATACTCTCTCAGTCCGCTCGCACCGAAGGAAGCTGCCTTGGGATCAGAGCAGACATAAAGCTAGAAAAATTTCAAGATGAAATTGAAATGGCCAATGAGCACACCCTCATTCATCCAGCGAGCATTGAGGACCCCCTAGAGGCCAGGCCCATGAGTGATGAAGATCCCGAGGATGAAGACGCCTTGCCAGCCAG
0	NA	chr22:26304288-26346416	-5102537251	0.025935506	MYO18B	ENSG00000133454	NA	NA	NA	NA	NA	NA	NA	NA	NA
4082	hsa_circ_0005175	chr22:26853824-26854543	-3492440643	0.005702811	HPS4	ENSG00000100099	hsa_circHPS4_007	-	242	ANNOTATED, CDS, coding, INTERNAL, OVCODE, OVEXON	0.391197170007301	NA	NA	hsa-miR-612:313.00, hsa-miR-6860:301.00, hsa-miR-6882-3p:166.00, hsa-miR-7107-5p:164.00, hsa-miR-1254:163.00	TACCACAGCAGCCTGGCTTCACTGAATGGGCTGGAAGTCCACCTGAAAGAGACGCTGCCCAGGGATGAGGCAGCCTCCACGAGCAGCACCTACAACTTCACACATTACGACCGCATTCAGAGCTTGCTGATGGCAAACCTGCCGCAGGTGGCCACCCCGCAGGATCGCCGCTTCCTCCAGGCCGTCAGCCTGATGCATAGCGAATTTGCCCAGCTGCCCGCGCTTTATGAAATGACTGTCAG
6822	hsa_circ_0001250	chr22:47022647-47033857	-2689173313	0.022553599	GRAMD4	ENSG00000075240	hsa_circGRAMD4_001	+	332	ALT_ACCEPTOR, CDS, coding, OVCODE, OVEXON, upstream_start, UTR5	0.781343621071057	NA	NA	hsa-miR-5002-5p:169.00, hsa-miR-6838-3p:165.00, hsa-miR-3977:163.00, hsa-miR-6787-3p:162.00, hsa-miR-6736-3p:161.00	GGAACCCGAGCGTCATGTTAGGGTGAAGCAGAGGACCTCAGTGCTGAACATGCTAAGGAGGTTGGACAAAATCAGGTTCAGAGGTCACAAGAGAGATGACTTCCTCGATCTAGCGGAGTCTCCAAATGCCTCGGACACCGAATGCAGCGACGAAATCCCCCTGAAGGTACCGCGGACCTCGCCCCGGGACAGCGAGGAGCTGAGGGACCCTGCTGGTCCAGGGACCCTCATCATGGCCACAGGAGTCCAGGACTTTAACCGGACAGAGTTTGATCGACTGAATGAGATCAAAGGTCACCTGGAAATTGCCTTATTGGAAAAACATTTCTTAC
11617	hsa_circ_0001333	chr3:125032151-125050082	-1905756168	0.042304124	ZNF148	ENSG00000163848	hsa_circZNF148_006	-	566	ANNOTATED, CDS, coding, INTERNAL, OVCODE, OVEXON, UTR5	0.796141272754887	0.339378602	NA	hsa-miR-591:172.00, hsa-miR-3689a-5p:168.00, hsa-miR-3689b-5p:168.00, hsa-miR-3689e:168.00, hsa-miR-6767-3p:167.00	GATAGAGGGAGGAATCAGCAGCTTGGAAATTCAAGCACGTGATCTGGCGGGATGGGCGTTTGCCTAACGTATTTAATGGAGGAATCGGATGGCATAAGTGATTAAGGTGGTATTGAGGATTTCTGAAGCCTATGAAAGGTAGAAACTCAACCATGATTTCTTTTTCAACTCTACAGCATTCCTTTCCTTGAAGTCTTCGTTTTTACCTTAGTCTCGGGCAGTTATACTTAAGCATGAACATTGACGACAAACTGGAAGGATTGTTTCTTAAATGTGGCGGCATAGACGAAATGCAGTCTTCCAGGACAATGGTTGTAATGGGTGGAGTGTCTGGCCAGTCTACTGTGTCTGGAGAGCTACAGGATTCAGTACTTCAAGATCGAAGTATGCCTCACCAGG…
1102	hsa_circ_0122120	chr3:138244331-138256189	-3749701715	0.031138058	CEP70	ENSG00000114107	hsa_circCEP70_014	-	479	ANNOTATED, CDS, coding, INTERNAL, OVCODE, OVEXON	0.6393968	NA	NA	hsa-miR-4778-3p:308.00, hsa-miR-519a-3p:171.00, hsa-miR-519b-3p:169.00, hsa-miR-519c-3p:169.00, hsa-miR-557:168.00	GTGAAGTGCCAGCATTATAAGAAAAAACGAACGGAGCAAGAAGAAACTATTGCTTCTTTGCAAATGGAAGTCTGTAGATTAAAAAAGGAGGAAGAAGATCGCATTGTCACTCAAAACAGAGTGTTTGCCTATCTGTGCAAAAGAGTTCCTCATACCGTCTTGGATAGACAGTTGCTTTGTCTAATTGATTACTATGAATCTAAAATTAGAAAAATTCATACACAAAGGCAATATAAAGAAGATGAAAGTCAGTCAGAAGAAGAAAACGACTACAGAAATCTGGATGCCTCACCAACTTATAAAGGCCTTTTAATGTCATTACAGAATCAACTCAAGGAATCAAAATCTAAGATTGATGCACTTTCAAGTGAAAAGCTGAACCTCCAAAAAGATTTGGAA…
0	hsa_circ_0003823	chr3:138289159-138291826	-5925188431	0.000425861	CEP70	ENSG00000114107	hsa_circCEP70_005	-	522	ALT_ACCEPTOR, CDS, coding, INTERNAL, intronic, OVCODE, OVEXON, UTR5	0.798676850290724	0.003200513	NA	hsa-miR-6888-3p:317.00, hsa-miR-7161-3p:315.00, hsa-miR-4677-5p:305.00, hsa-miR-769-3p:301.00, hsa-miR-6855-5p:168.00	GCAACTCAAATTTTTTAATTGCCAATTTCTGTTTCTTTTGATTCTACAAAAGTAACTATGTTTCCGGTAGCCCCTAAACCCCAGGATTCCAGTCAACCATCAGACAGACTCATGACTGAAAAACAGCAGGAAGAAGCAGAATGGGAAAGCATAAATGTGCTATTGATGATGCATGGCTTAAAACCTTTGTCTCTAGTCAAAAGAACAGATCTCAAAGATCTCATCATTTTTGACAAACAGTCATCACAAAGGATGAGACAGAATTTGAAATTGTTGGTGGAAGAAACATCATGTCAACAGAACATGATACAGGAGCTTATAGAAACTAATCAACAGCTTAGAAATGAACTTCAGCTAGAGCAAAGCCGAGCAGCCAATCAAGAACAACGAGCTAATGAC…
0	hsa_circ_0003823	chr3:138289159-138291826	-4990282775	0.012782925	CEP70	ENSG00000114107	hsa_circCEP70_005	-	522	ALT_ACCEPTOR, CDS, coding, INTERNAL, intronic, OVCODE, OVEXON, UTR5	0.798676850290724	0.003200513	NA	hsa-miR-6888-3p:317.00, hsa-miR-7161-3p:315.00, hsa-miR-4677-5p:305.00, hsa-miR-769-3p:301.00, hsa-miR-6855-5p:168.00	GCAACTCAAATTTTTTAATTGCCAATTTCTGTTTCTTTTGATTCTACAAAAGTAACTATGTTTCCGGTAGCCCCTAAACCCCAGGATTCCAGTCAACCATCAGACAGACTCATGACTGAAAAACAGCAGGAAGAAGCAGAATGGGAAAGCATAAATGTGCTATTGATGATGCATGGCTTAAAACCTTTGTCTCTAGTCAAAAGAACAGATCTCAAAGATCTCATCATTTTTGACAAACAGTCATCACAAAGGATGAGACAGAATTTGAAATTGTTGGTGGAAGAAACATCATGTCAACAGAACATGATACAGGAGCTTATAGAAACTAATCAACAGCTTAGAAATGAACTTCAGCTAGAGCAAAGCCGAGCAGCCAATCAAGAACAACGAGCTAATGAC…
0	NA	chr3:154801946-154836600	-4213457563	0.030544945	MME	ENSG00000196549	NA	NA	NA	NA	NA	NA	NA	NA	NA
0	hsa_circ_0002626	chr3:154832782-154836600	-5938296906	0.000276286	MME	ENSG00000196549	hsa_circMME_002	+	524	ANNOTATED, CDS, coding, INTERNAL, OVCODE, OVEXON	0.806818368105672	NA	chr3_63326713_63329715_+	hsa-miR-4490:166.00, hsa-let-7c-3p:164.00, hsa-miR-10b-3p:164.00, hsa-miR-664a-3p:164.00, hsa-miR-148b-3p:163.00, hsa-miR-6885-3p:163.00	CTGCTCGACTGATCCAAAACATGGATGCCACCACTGAGCCTTGTACAGACTTTTTCAAATATGCTTGCGGAGGCTGGTTGAAACGTAATGTCATTCCCGAGACCAGCTCCCGTTACGGCAACTTTGACATTTTAAGAGATGAACTAGAAGTCGTTTTGAAAGATGTCCTTCAAGAACCCAAAACTGAAGATATAGTAGCAGTGCAGAAAGCAAAAGCATTGTACAGGTCTTGTATAAATGAATCTGCTATTGATAGCAGAGGTGGAGAACCTCTACTCAAACTGTTACCAGACATATATGGGTGGCCAGTAGCAACAGAAAACTGGGAGCAAAAATATGGTGCTTCTTGGACAGCTGAAAAAGCTATTGCACAACTGAATTCTAAATATGGGAAAAAAG…
0	hsa_circ_0002626	chr3:154832782-154836600	-514622719	0.014667837	MME	ENSG00000196549	hsa_circMME_002	+	524	ANNOTATED, CDS, coding, INTERNAL, OVCODE, OVEXON	0.806818368105672	NA	chr3_63326713_63329715_+	hsa-miR-4490:166.00, hsa-let-7c-3p:164.00, hsa-miR-10b-3p:164.00, hsa-miR-664a-3p:164.00, hsa-miR-148b-3p:163.00, hsa-miR-6885-3p:163.00	CTGCTCGACTGATCCAAAACATGGATGCCACCACTGAGCCTTGTACAGACTTTTTCAAATATGCTTGCGGAGGCTGGTTGAAACGTAATGTCATTCCCGAGACCAGCTCCCGTTACGGCAACTTTGACATTTTAAGAGATGAACTAGAAGTCGTTTTGAAAGATGTCCTTCAAGAACCCAAAACTGAAGATATAGTAGCAGTGCAGAAAGCAAAAGCATTGTACAGGTCTTGTATAAATGAATCTGCTATTGATAGCAGAGGTGGAGAACCTCTACTCAAACTGTTACCAGACATATATGGGTGGCCAGTAGCAACAGAAAACTGGGAGCAAAAATATGGTGCTTCTTGGACAGCTGAAAAAGCTATTGCACAACTGAATTCTAAATATGGGAAAAAAG…
0	hsa_circ_0002626	chr3:154832782-154836600	-572805707	0.000300029	MME	ENSG00000196549	hsa_circMME_002	+	524	ANNOTATED, CDS, coding, INTERNAL, OVCODE, OVEXON	0.806818368105672	NA	chr3_63326713_63329715_+	hsa-miR-4490:166.00, hsa-let-7c-3p:164.00, hsa-miR-10b-3p:164.00, hsa-miR-664a-3p:164.00, hsa-miR-148b-3p:163.00, hsa-miR-6885-3p:163.00	CTGCTCGACTGATCCAAAACATGGATGCCACCACTGAGCCTTGTACAGACTTTTTCAAATATGCTTGCGGAGGCTGGTTGAAACGTAATGTCATTCCCGAGACCAGCTCCCGTTACGGCAACTTTGACATTTTAAGAGATGAACTAGAAGTCGTTTTGAAAGATGTCCTTCAAGAACCCAAAACTGAAGATATAGTAGCAGTGCAGAAAGCAAAAGCATTGTACAGGTCTTGTATAAATGAATCTGCTATTGATAGCAGAGGTGGAGAACCTCTACTCAAACTGTTACCAGACATATATGGGTGGCCAGTAGCAACAGAAAACTGGGAGCAAAAATATGGTGCTTCTTGGACAGCTGAAAAAGCTATTGCACAACTGAATTCTAAATATGGGAAAAAAG…
0	NA	chr3:154855890-154858081	-4034411524	0.040296695	MME	ENSG00000196549	NA	NA	NA	NA	NA	NA	NA	NA	NA
2189	hsa_circ_0001281	chr3:35721278-35732497	-4767288865	0.003149448	ARPP21	ENSG00000172995	hsa_circARPP21_009	+	898	ANNOTATED, CDS, coding, INTERNAL, UTR5	0.989793260535734	NA	NA	hsa-miR-6827-3p:310.00, hsa-miR-22-3p:167.00, hsa-miR-6844:167.00, hsa-miR-875-3p:166.00, hsa-miR-5096:161.00, hsa-miR-6772-3p:161.00	GTTGACGATGTGTCACACTGTGTAAGGGAATCGCATGGAGATGGGCATTCCGAACTGTTAATGGGGACATGGGACTCCAGTTGTCTCTGATCACTTGTGTGGATTTTCCTGGCGTAGAACGACAGAAGCCGCTAGTAAGTCGCCAAGACCTACAGCAGGAATTCTGCACCAAAGGGCATAAAATCTTGTTATTTTAATTTGCATCTGGGAGAATGTCTGAGCAAGGAGACCTGAATCAGGCAATAGCAGAGGAAGGAGGGACTGAGCAGGAGACGGCCACTCCAGAGAACGGCATTGTTAAATCAGAAAGTCTGGATGAAGAGGAGAAACTGGAACTGCAGAGGCGGCTGGAGGCTCAGAATCAAGAAAGAAGAAAATCCAAGTCAGGAGCAGGAAAAG…
2189	hsa_circ_0001281	chr3:35721278-35732497	-5155155827	0.000426053	ARPP21	ENSG00000172995	hsa_circARPP21_009	+	898	ANNOTATED, CDS, coding, INTERNAL, UTR5	0.989793260535734	NA	NA	hsa-miR-6827-3p:310.00, hsa-miR-22-3p:167.00, hsa-miR-6844:167.00, hsa-miR-875-3p:166.00, hsa-miR-5096:161.00, hsa-miR-6772-3p:161.00	GTTGACGATGTGTCACACTGTGTAAGGGAATCGCATGGAGATGGGCATTCCGAACTGTTAATGGGGACATGGGACTCCAGTTGTCTCTGATCACTTGTGTGGATTTTCCTGGCGTAGAACGACAGAAGCCGCTAGTAAGTCGCCAAGACCTACAGCAGGAATTCTGCACCAAAGGGCATAAAATCTTGTTATTTTAATTTGCATCTGGGAGAATGTCTGAGCAAGGAGACCTGAATCAGGCAATAGCAGAGGAAGGAGGGACTGAGCAGGAGACGGCCACTCCAGAGAACGGCATTGTTAAATCAGAAAGTCTGGATGAAGAGGAGAAACTGGAACTGCAGAGGCGGCTGGAGGCTCAGAATCAAGAAAGAAGAAAATCCAAGTCAGGAGCAGGAAAAG…
0	hsa_circ_0002912	chr3:44871462-44881948	-4017648891	0.039012884	KIF15	ENSG00000163808	hsa_circKIF15_025	+	477	ANNOTATED, CDS, coding, INTERNAL, OVCODE, OVEXON	0.999999235778445	NA	NA	hsa-miR-1248:318.00, hsa-miR-1304-5p:171.00, hsa-miR-4494:168.00, hsa-miR-612:168.00, hsa-miR-450b-5p:164.00, hsa-miR-6728-3p:164.00, hsa-miR-6875-3p:164.00	AAAGTTGTAGCTGACCTCATGAACCAGATCCAGGAGCTAAGAACATCGGTCTGTGAGAAAACAGAAACTATAGACACCCTGAAACAAGAACTGAAGGACATAAATTGCAAATACAACTCTGCTTTGGTTGACAGAGAAGAGAGCAGAGTGTTGATCAAGAAGCAGGAAGTGGATATTCTGGATCTGAAAGAAACCCTTAGGCTGAGAATACTTTCTGAGGACATAGAGAGGGATATGCTCTGTGAGGACCTGGCTCATGCCACTGAGCAGCTGAACATGCTCACAGAGGCCTCAAAAAAACACTCGGGGCTGCTGCAGTCTGCCCAGGAAGAACTGACCAAGAAGGAAGCCCTGATTCAGGAACTTCAGCACAAGCTAAACCAAAAGAAAGAGGAAGTA…
2023	NA	chr3:71408300-71542706	-461863485	0.023525583	FOXP1	ENSG00000114861	NA	NA	NA	NA	NA	NA	NA	NA	NA
0	hsa_circ_0002782	chr4:103225473-103236987	-6146786883	7.51e-05	SLC39A8	ENSG00000138821	hsa_circSLC39A8_007	-	621	ANNOTATED, CDS, coding, INTERNAL, OVCODE, OVEXON	0.999984765437589	0.000709042	NA	hsa-miR-2113:171.00, hsa-miR-6513-5p:169.00, hsa-miR-1179:165.00, hsa-miR-551b-5p:164.00, hsa-miR-3660:163.00	TGTTTAACTGCTGAAGAGATCTTTTCCCTTCATGGCTTTTCAAATGCTACCCAAATAACCAGCTCCAAATTCTCTGTCATCTGTCCAGCAGTCTTACAGCAATTGAACTTTCACCCATGTGAGGATCGGCCCAAGCACAAAACAAGACCAAGTCATTCAGAAGTTTGGGGATATGGATTCCTGTCAGTGACGATTATTAATCTGGCATCTCTCCTCGGATTGATTTTGACTCCACTGATAAAGAAATCTTATTTCCCAAAGATTTTGACCTTTTTTGTGGGGCTGGCTATTGGGACTCTTTTTTCAAATGCAATTTTCCAACTTATTCCAGAGGCATTTGGATTTGATCCCAAAGTCGACAGTTATGTTGAGAAGGCAGTTGCTGTGTTTGGTGGATTT…
0	hsa_circ_0002782	chr4:103225473-103236987	-6275658578	0.000452373	SLC39A8	ENSG00000138821	hsa_circSLC39A8_007	-	621	ANNOTATED, CDS, coding, INTERNAL, OVCODE, OVEXON	0.999984765437589	0.000709042	NA	hsa-miR-2113:171.00, hsa-miR-6513-5p:169.00, hsa-miR-1179:165.00, hsa-miR-551b-5p:164.00, hsa-miR-3660:163.00	TGTTTAACTGCTGAAGAGATCTTTTCCCTTCATGGCTTTTCAAATGCTACCCAAATAACCAGCTCCAAATTCTCTGTCATCTGTCCAGCAGTCTTACAGCAATTGAACTTTCACCCATGTGAGGATCGGCCCAAGCACAAAACAAGACCAAGTCATTCAGAAGTTTGGGGATATGGATTCCTGTCAGTGACGATTATTAATCTGGCATCTCTCCTCGGATTGATTTTGACTCCACTGATAAAGAAATCTTATTTCCCAAAGATTTTGACCTTTTTTGTGGGGCTGGCTATTGGGACTCTTTTTTCAAATGCAATTTTCCAACTTATTCCAGAGGCATTTGGATTTGATCCCAAAGTCGACAGTTATGTTGAGAAGGCAGTTGCTGTGTTTGGTGGATTT…
0	hsa_circ_0002782	chr4:103225473-103236987	-5709797016	0.007457415	SLC39A8	ENSG00000138821	hsa_circSLC39A8_007	-	621	ANNOTATED, CDS, coding, INTERNAL, OVCODE, OVEXON	0.999984765437589	0.000709042	NA	hsa-miR-2113:171.00, hsa-miR-6513-5p:169.00, hsa-miR-1179:165.00, hsa-miR-551b-5p:164.00, hsa-miR-3660:163.00	TGTTTAACTGCTGAAGAGATCTTTTCCCTTCATGGCTTTTCAAATGCTACCCAAATAACCAGCTCCAAATTCTCTGTCATCTGTCCAGCAGTCTTACAGCAATTGAACTTTCACCCATGTGAGGATCGGCCCAAGCACAAAACAAGACCAAGTCATTCAGAAGTTTGGGGATATGGATTCCTGTCAGTGACGATTATTAATCTGGCATCTCTCCTCGGATTGATTTTGACTCCACTGATAAAGAAATCTTATTTCCCAAAGATTTTGACCTTTTTTGTGGGGCTGGCTATTGGGACTCTTTTTTCAAATGCAATTTTCCAACTTATTCCAGAGGCATTTGGATTTGATCCCAAAGTCGACAGTTATGTTGAGAAGGCAGTTGCTGTGTTTGGTGGATTT…
0	hsa_circ_0002782	chr4:103225473-103236987	-6478090961	3.9e-05	SLC39A8	ENSG00000138821	hsa_circSLC39A8_007	-	621	ANNOTATED, CDS, coding, INTERNAL, OVCODE, OVEXON	0.999984765437589	0.000709042	NA	hsa-miR-2113:171.00, hsa-miR-6513-5p:169.00, hsa-miR-1179:165.00, hsa-miR-551b-5p:164.00, hsa-miR-3660:163.00	TGTTTAACTGCTGAAGAGATCTTTTCCCTTCATGGCTTTTCAAATGCTACCCAAATAACCAGCTCCAAATTCTCTGTCATCTGTCCAGCAGTCTTACAGCAATTGAACTTTCACCCATGTGAGGATCGGCCCAAGCACAAAACAAGACCAAGTCATTCAGAAGTTTGGGGATATGGATTCCTGTCAGTGACGATTATTAATCTGGCATCTCTCCTCGGATTGATTTTGACTCCACTGATAAAGAAATCTTATTTCCCAAAGATTTTGACCTTTTTTGTGGGGCTGGCTATTGGGACTCTTTTTTCAAATGCAATTTTCCAACTTATTCCAGAGGCATTTGGATTTGATCCCAAAGTCGACAGTTATGTTGAGAAGGCAGTTGCTGTGTTTGGTGGATTT…
0	hsa_circ_0002782	chr4:103225473-103236987	-59846135	0.000432759	SLC39A8	ENSG00000138821	hsa_circSLC39A8_007	-	621	ANNOTATED, CDS, coding, INTERNAL, OVCODE, OVEXON	0.999984765437589	0.000709042	NA	hsa-miR-2113:171.00, hsa-miR-6513-5p:169.00, hsa-miR-1179:165.00, hsa-miR-551b-5p:164.00, hsa-miR-3660:163.00	TGTTTAACTGCTGAAGAGATCTTTTCCCTTCATGGCTTTTCAAATGCTACCCAAATAACCAGCTCCAAATTCTCTGTCATCTGTCCAGCAGTCTTACAGCAATTGAACTTTCACCCATGTGAGGATCGGCCCAAGCACAAAACAAGACCAAGTCATTCAGAAGTTTGGGGATATGGATTCCTGTCAGTGACGATTATTAATCTGGCATCTCTCCTCGGATTGATTTTGACTCCACTGATAAAGAAATCTTATTTCCCAAAGATTTTGACCTTTTTTGTGGGGCTGGCTATTGGGACTCTTTTTTCAAATGCAATTTTCCAACTTATTCCAGAGGCATTTGGATTTGATCCCAAAGTCGACAGTTATGTTGAGAAGGCAGTTGCTGTGTTTGGTGGATTT…
0	hsa_circ_0125604	chr4:156617907-156643344	-5076655808	0.006931298	GUCY1A3	ENSG00000164116	hsa_circGUCY1A3_005	+	1983	ANNOTATED, CDS, coding, INTERNAL, OVCODE, OVEXON, UTR5	1	NA	NA	hsa-miR-6893-3p:478.00, hsa-miR-8080:318.00, hsa-miR-3614-3p:317.00, hsa-miR-2117:314.00, hsa-miR-511-5p:314.00	ACATCCCAGTTACCAGTGTCCTTGAATTGATAGTGGCTTCTGTTTGTCAGTCTCATATAAGAACTACAGCTCATCAGGAGGAGATCGCAGCAGGGTAAGAGACACCAACACCATGTTCTGCACGAAGCTCAAGGATCTCAAGATCACAGGAGAGTGTCCTTTCTCCTTACTGGCACCAGGTCAAGTTCCTAACGAGTCTTCAGAGGAGGCAGCAGGAAGCTCAGAGAGCTGCAAAGCAACCGTGCCCATCTGTCAAGACATTCCTGAGAAGAACATACAAGAAAGTCTTCCTCAAAGAAAAACCAGTCGGAGCCGAGTCTATCTTCACACTTTGGCAGAGAGTATTTGCAAACTGATTTTCCCAGAGTTTGAACGGCTGAATGTTGCACTTCAGAGAAC…
17353	hsa_circ_0071375	chr4:166141085-166184511	-3716074286	2.61e-06	KLHL2	ENSG00000109466	hsa_circKLHL2_005	+	518	ANNOTATED, CDS, coding, INTERNAL, OVCODE, OVEXON	0.9564717	0.391045162	NA	hsa-miR-30e-5p:309.00, hsa-miR-541-5p:165.00, hsa-miR-30a-5p:163.00, hsa-miR-619-5p:161.00, hsa-miR-653-3p:161.00	ATGCACAAAGCAGGGTCATCAGAAGCCTCTCGATTCAAAAGATGATAATACCGAAAAACACTGCCCAGTGACAGTGAATCCTTGGCATATGAAGAAAGCTTTCAAAGTCATGAACGAATTAAGAAGTCAAAATTTGCTGTGCGATGTCACAATTGTGGCAGAAGACATGGAAATTTCTGCTCATAGAGTGGTGCTGGCCGCCTGTAGTCCTTATTTTCATGCCATGTTTACAGGTGAGATGAGTGAGAGCCGAGCAAAGAGAGTTAGAATAAAAGAGGTAGATGGCTGGACCCTGAGGATGCTAATTGATTATGTTTACACTGCAGAAATTCAGGTTACAGAAGAAAATGTACAGGTACTTCTCCCAGCAGCTGGTCTCTTACAGTTACAGGATGTGAA…
8476	hsa_circ_0001460	chr4:178274461-178281831	-2259211694	0.03971693	NEIL3	ENSG00000109674	hsa_circNEIL3_011	+	596	ANNOTATED, CDS, coding, INTERNAL	0.695199738600675	0.865257785	NA	hsa-miR-4668-3p:168.00, hsa-miR-342-5p:167.00, hsa-miR-548l:166.00, hsa-miR-208a-5p:163.00, hsa-miR-4744:163.00, hsa-miR-6894-3p:163.00	ATTCAGTGCTCAAGAGTGAAGAAAATTCTACTGTCTTTAGCCACTTAATGAAGTACCCGTGTAATACTTTTGGAAAACCTCATACAGAAGTCAAGATCAACAGAAAAACTGCATTTGGAACTACAACTCTTGTCTTGACTGATTTTAGCAATAAATCCAGTACTTTGGAAAGAAAAACAAAGCAAAACCAGATACTAGATGAGGAGTTTCAAAACTCTCCTCCTGCTAGTGTTTGTTTGAATGATATACAGCACCCCTCCAAGAAGACAACAAACGATATAACTCAACCATCCAGCAAAGTAAACATATCACCTACAATCAGTTCAGAATCTAAATTATTTAGTCCAGCACATAAAAAACCGAAAACAGCCCAATACTCATCACCAGAGCTTAAAAGCT…
0	hsa_circ_0001461	chr4:187627716-187630999	-6743444767	0.000107827	FAT1	ENSG00000083857	hsa_circFAT1_004	-	3283	ANNOTATED, CDS, coding, INTERNAL, UTR5	1	0.72168597	NA	hsa-miR-942-5p:477.00, hsa-miR-30e-5p:338.00, hsa-miR-30a-5p:328.00, hsa-miR-329-5p:325.00, hsa-miR-4453:324.00	ATTCCCGACAGTTAAGCAATGGGGAGACATTTGGCTTTGCTCCTGCTTCTGCTCCTTCTCTTCCAACATTTTGGAGACAGTGATGGCAGCCAACGACTTGAACAGACTCCTCTGCAGTTTACACACCTCGAGTACAACGTCACCGTGCAGGAGAACTCTGCAGCTAAGACTTATGTGGGGCATCCTGTCAAGATGGGTGTTTACATTACACATCCAGCGTGGGAAGTAAGGTACAAAATTGTTTCCGGAGACAGTGAAAACCTGTTCAAAGCTGAAGAGTACATTCTCGGAGACTTTTGCTTTCTAAGAATAAGGACCAAAGGAGGAAATACAGCTATTCTTAATAGAGAAGTGAAGGATCACTACACATTGATAGTGAAAGCACTTGAAAAAAATACT…
3291	hsa_circ_0002785	chr4:22403053-22404422	-4745651063	0.000265942	GPR125	ENSG00000152990	hsa_circGPR125_014	-	249	ANNOTATED, CDS, coding, INTERNAL, OVCODE, OVEXON	0.856902584674576	0.001282668	NA	hsa-miR-485-5p:318.00, hsa-miR-513b-5p:168.00, hsa-miR-4722-5p:161.00, hsa-miR-3929:158.00, hsa-miR-4720-5p:157.00	GATTTGACGGGATCTGAACTATACACCCAGGCGGCCAGCCTCCTGCATCCTGTGGTTTATACTACCGCTATCATTCTCCTCTTATGTCTCTTAGCCGTCATTGTCAGTTACATATACCATCACAGTTTGATTAGAATCAGCCTCAAGAGCTGGCACATGCTTGTGAACTTGTGCTTTCATATTTTCCTAACCTGTGTGGTCTTTGTGGGAGGAATAACCCAGACTAGGAATGCCAGCATCTGCCAAGCA
0	hsa_circ_0006091	chr4:3317796-3344780	-4481960326	0.02393864	RGS12	ENSG00000159788	hsa_circRGS12_003	+	2099	ANNOTATED, CDS, coding, INTERNAL, OVCODE, OVEXON, UTR5	0.999999995041447	0.998445172	NA	hsa-miR-372-5p:326.00, hsa-miR-4469:316.00, hsa-miR-4665-3p:316.00, hsa-miR-1199-3p:312.00, hsa-miR-6775-5p:312.00	GGCACTGTTTGAAGAAGCAAACATGGTAGCATCAAGCATTCCTTGAAATATGGCTCCAAGGGAACAATGAGACGTGCTCTTGGTCTTGGAAGCTCATCAGAATGTTTAGAGCTGGGGAGGCCTCCAAACGCCCATTGCCTGGGCCGTCGCCCCCAAGGGTGCGGAGTGTGGAGGTTGCCCGGGGGAGGGCCGGCTACGGATTCACGCTTTCGGGACAGGCACCCTGTGTGCTCAGCTGCGTCATGAGAGGGAGCCCTGCGGATTTCGTGGGCCTCCGAGCTGGAGACCAGATACTTGCTGTCAATGAAATCAACGTGAAAAAAGCATCTCATGAAGATGTAGTGAAATTAATTGGGAAGTGCTCTGGTGTCCTTCACATGGTGATTGCTGAAGGCGTCG…
8787	hsa_circ_0001400	chr4:37633006-37640126	-2788842906	0.000191242	RELL1	ENSG00000181826	hsa_circRELL1_005	-	434	ANNOTATED, CDS, coding, INTERNAL, OVCODE, OVEXON, UTR3	0.635063912297592	0.041053025	chr5_63924734_63930535_-	hsa-miR-1227-3p:312.00, hsa-miR-425-5p:166.00, hsa-miR-6840-3p:166.00, hsa-miR-6868-3p:165.00, hsa-miR-7151-3p:163.00	CGAATGCTGATGTCTTAAAGGCGATGGTAGCAGATAACAGCCTGTATGATCCTGAAAGCCCCGTGACCCCCAGCACACCAGGGAGCCCGCCAGTGAGTCCTGGGCCTTTGTCACCAGGGGGGACGCCAGGGAAGCACGTCTGTGGCCATCATCTGCATACGGTGGGCGGTGTTGTCGAGAGGGATGTGTGTCATCGGTGTAGGCACAAGCGGTGGCACTTTATAAAGCCCACTAACAAGTCCAGAGAGAGCAGACCACGGCGCCAAGGCGAGGTCACGGTCCTTTCTGTTGGCAGATTTAGAGTTACAAAAGTGGAGCACAAGTCAAACCAGAAGGAACGGAGAAGCCTGATGTCTGTTAGTGGGGCTGAAACCGTCAATGGGGAGGTGCCGGCAACAC…
5019	NA	chr5:143042459-143052262	-3004116777	0.018980424	CTB-57H20.1	ENSG00000249881	NA	NA	NA	NA	NA	NA	NA	NA	NA
5019	NA	chr5:143042459-143052262	-3208739473	0.012233758	CTB-57H20.1	ENSG00000249881	NA	NA	NA	NA	NA	NA	NA	NA	NA
5019	NA	chr5:143042459-143052262	-2731653864	0.005833168	CTB-57H20.1	ENSG00000249881	NA	NA	NA	NA	NA	NA	NA	NA	NA
5019	NA	chr5:143042459-143052262	-3295939622	0.00066631	CTB-57H20.1	ENSG00000249881	NA	NA	NA	NA	NA	NA	NA	NA	NA
5019	NA	chr5:143042459-143052262	-3515260181	0.00077622	CTB-57H20.1	ENSG00000249881	NA	NA	NA	NA	NA	NA	NA	NA	NA
0	hsa_circ_0005145	chr5:14673750-14681716	-4602002253	0.046518687	FAM105B	ENSG00000154124	hsa_circFAM105B_002	+	316	ANNOTATED, CDS, coding, INTERNAL, OVCODE, OVEXON	0.335761639381431	0.000916528	chr15_27616323_27623358_-	hsa-miR-4323:170.00, hsa-miR-423-3p:163.00, hsa-miR-4482-3p:163.00, hsa-miR-3116:161.00, hsa-miR-138-2-3p:159.00, hsa-miR-485-3p:159.00	TGAGGAGGACATGTACCGTGCTGCAGATGAAATAGAAAAGGAGAAAGAATTGCTTATACATGAAAGAGGGGCATCAGAACCGAGATTAAGCGTAGCTCCTGAAATGGATATCATGGACTACTGCAAAAAAGAATGGAGAGGAAATACACAGAAAGCAACGTGTATGAAAATGGGCTATGAAGAGGTTTCTCAGAAGTTCACCTCCATACGGCGAGTCCGTGGTGATAATTACTGTGCACTGAGGGCCACGCTGTTCCAGGCCATGAGCCAGGCTGTGGGGCTGCCGCCCTGGCTGCAGGACCCGGAGCTCATGCTG
1102	NA	chr5:158500403-158526471	-5767588536	0.000129268	EBF1	ENSG00000164330	NA	NA	NA	NA	NA	NA	NA	NA	NA
0	hsa_circ_0006411	chr5:67522117-67522837	-5330092719	0.029285779	PIK3R1	ENSG00000145675	hsa_circPIK3R1_002	+	720	ANNOTATED, CDS, coding, INTERNAL, OVCODE, OVEXON, UTR5	0.60201657269644	0.997411303	NA	hsa-miR-7162-5p:316.00, hsa-miR-6089:184.00, hsa-miR-6784-5p:173.00, hsa-miR-922:171.00, hsa-miR-3689b-3p:167.00, hsa-miR-3689c:167.00, hsa-miR-548q:167.00	GTGAAGCTCGTGTGTGGAGTGCCACGGTACAATCAGACGACAGATGGACAGTGTGACAAAAGTGTCAGAAAGGATTGGGCCTCGCTGTGAGAGTCAGCCTGGATTCAAAGTGTTGACAAGTTGCTGAAAAGGAAGCCAGTGAGAGGACTGTGGCACGCAGAGGAAGTGGAGCCCTGTCTTCGGTCACACCATTGATGGAGGACAGATGGACAGCCGTATGGCCAGTCACCTCTCCTCTTAAACCTTTGGAGAGTGGTCCTTTGTCCTCTGCTGGACACATAATAGGAATTCTAACACATTCTCTGAATTCACTTTTCATAAAAACGTAAAATCAGACTGCTCTGTACAACCAGGCTCAACTGTTGCATGGTAGCAGATTTGCAAACATGAGTGCTGAGG…
4303	hsa_circ_0073222	chr5:80911291-80946158	-2788766614	0.027697945	SSBP2	ENSG00000145687	hsa_circSSBP2_010	-	220	ANNOTATED, CDS, coding, INTERNAL, OVCODE, OVEXON	0.03301221	0.002135954	NA	hsa-miR-3941:170.00, hsa-miR-4307:164.00, hsa-miR-8066:162.00, hsa-miR-362-3p:159.00, hsa-miR-3679-3p:157.00	GTTAGCACTCTACGTATATGAATATCTGCTCCATGTAGGAGCTCAGAAATCAGCTCAAACATTTTTATCAGAGATAAGATGGGAAAAAAACATCACATTGGGGGAACCACCAGGATTCTTACATTCTTGGTGGTGTGTATTTTGGGATCTCTACTGTGCAGCTCCAGAGAGACGTGAAACATGTGAACACTCAAGTGAAGCAAAAGCCTTCCATGATTAC
0	hsa_circ_0130752	chr6:135522776-135524462	-4252032531	0.04424073	MYB	ENSG00000118513	hsa_circMYB_009	+	477	ANNOTATED, CDS, coding, INTERNAL, OVCODE, OVEXON	0.998289	NA	NA	hsa-miR-1273h-5p:316.00, hsa-miR-1827:307.00, hsa-miR-1268b:178.00, hsa-miR-1268a:176.00, hsa-miR-7851-3p:168.00	GTGGAATCTCCAACTGATAAATCAGGAAACTTCTTCTGCTCACACCACTGGGAAGGGGACAGTCTGAATACCCAACTGTTCACGCAGACCTCGCCTGTGGCAGATGCACCGACTGGAGTGCAATGGCACGATTTCGGCTCACTGCAACCTCTGCCTCCCGGGTTCAAGCGATTCTCCTGCCTCAGTCTCCCGAGAAGCTGGGATTACAGGCACCCGCCACCACGCCCAGCTAATTTTGAATTTTTAGTAGAGACGGGGTTTCTCCATGTTGGTCAGGCTGGTCTTGAACTCCTGACCTCAGGTGATCTACCCGCCTCGGCCTCCCAAAGTGCTAGGATTACAGGCGTGAGCCACCGCGCCCGGCCAGATAATATTCTTACAAGCTCCGTTTTAATGGCA…
0	hsa_circ_0078299	chr6:151669845-151674887	-5252413919	0.009719231	AKAP12	ENSG00000131016	hsa_circAKAP12_002	+	5042	ANNOTATED, CDS, coding, INTERNAL, OVCODE, OVEXON, UTR3	1	0.996895171	NA	hsa-miR-942-5p:959.00, hsa-miR-3173-5p:759.00, hsa-miR-4677-5p:638.00, hsa-miR-6881-3p:632.00, hsa-miR-6728-3p:629.00, hsa-miR-6809-3p:629.00	TTGGACAGAGAGACTCTGAAGATGTGAGCAAAAGAGACTCCGATAAAGAGATGGCTACTAAGTCAGCGGTTGTTCACGACATCACAGATGATGGGCAGGAGGAGACACCCGAAATAATCGAACAGATTCCTTCTTCAGAAAGCAATTTAGAAGAGCTAACACAACCCACTGAGTCCCAGGCTAATGATATTGGATTTAAGAAGGTGTTTAAGTTTGTTGGCTTTAAATTCACTGTGAAAAAGGATAAGACAGAGAAGCCTGACACTGTCCAGCTACTCACTGTGAAGAAAGATGAAGGGGAGGGAGCAGCAGGGGCTGGCGACCACAAGGACCCCAGCCTTGGGGCTGGAGAAGCAGCATCCAAAGAAAGCGAACCCAAACAATCTACAGAGAAACCCG…
8294	hsa_circ_0006405	chr6:157150360-157256710	-2303166539	0.023525583	ARID1B	ENSG00000049618	hsa_circARID1B_007	+	495	ANNOTATED, CDS, coding, INTERNAL, OVCODE, OVEXON	0.999999153773084	NA	NA	hsa-miR-370-3p:478.00, hsa-miR-6762-5p:308.00, hsa-miR-3692-5p:307.00, hsa-miR-6807-3p:184.00, hsa-miR-4641:175.00	GGCAGCCCAATGGATCCAATGGTGATGAAGAGACCTCAGTTGTATGGCATGGGCAGTAACCCTCATTCTCAGCCTCAGCAGAGCAGTCCGTACCCAGGAGGTTCCTATGGCCCTCCAGGCCCACAGCGGTATCCAATTGGCATCCAGGGTCGGACTCCCGGGGCCATGGCCGGAATGCAGTACCCTCAGCAGCAGGACTCTGGAGATGCCACATGGAAAGAAACATTCTGGTTGATGCCACCTCAGTATGGACAGCAAGGTGTGAGTGGTTACTGCCAGCAGGGCCAACAGCCATATTACAGCCAGCAGCCGCAGCCCCCGCACCTCCCACCCCAGGCGCAGTATCTGCCGTCCCAGTCCCAGCAGAGGTACCAGCCGCAGCAGGACATGTCTCAGGAA…
5736	hsa_circ_0075796	chr6:18236682-18258636	-2394213268	0.009417643	DEK	ENSG00000124795	hsa_circDEK_005	-	902	ANNOTATED, CDS, coding, INTERNAL, OVCODE, OVEXON	0.9959768	0.845161503	NA	hsa-miR-1248:457.00, hsa-miR-4659a-3p:311.00, hsa-miR-4659b-3p:307.00, hsa-miR-4539:303.00, hsa-miR-6873-3p:302.00, hsa-miR-6881-3p:302.00	AAAAGAGTCTCATCGTGGAAGGCAAGAGGGAAAAGAAAAAAGTAGAGAGGTTGACAATGCAAGTCTCTTCCTTACAGAGAGAGCCATTTACAATTGCACAAGGAAAGGGGCAGAAACTTTGTGAAATTGAGAGGATACATTTTTTTCTAAGTAAGAAGAAAACCGATGAACTTAGAAATCTACACAAACTGCTTTACAACAGGCCAGGCACTGTGTCCTCATTAAAGAAGAATGTGGGTCAGTTCAGTGGCTTTCCATTTGAAAAAGGAAGTGTCCAATATAAAAAGAAGGAAGAAATGTTGAAAAAATTTAGAAATGCCATGTTAAAGAGCATCTGTGAGGTTCTTGATTTGGAGAGATCAGGTGTAAATAGTGAACTAGTGAAGAGGATCTTGAATT…
5736	hsa_circ_0075796	chr6:18236682-18258636	-273059751	0.006565426	DEK	ENSG00000124795	hsa_circDEK_005	-	902	ANNOTATED, CDS, coding, INTERNAL, OVCODE, OVEXON	0.9959768	0.845161503	NA	hsa-miR-1248:457.00, hsa-miR-4659a-3p:311.00, hsa-miR-4659b-3p:307.00, hsa-miR-4539:303.00, hsa-miR-6873-3p:302.00, hsa-miR-6881-3p:302.00	AAAAGAGTCTCATCGTGGAAGGCAAGAGGGAAAAGAAAAAAGTAGAGAGGTTGACAATGCAAGTCTCTTCCTTACAGAGAGAGCCATTTACAATTGCACAAGGAAAGGGGCAGAAACTTTGTGAAATTGAGAGGATACATTTTTTTCTAAGTAAGAAGAAAACCGATGAACTTAGAAATCTACACAAACTGCTTTACAACAGGCCAGGCACTGTGTCCTCATTAAAGAAGAATGTGGGTCAGTTCAGTGGCTTTCCATTTGAAAAAGGAAGTGTCCAATATAAAAAGAAGGAAGAAATGTTGAAAAAATTTAGAAATGCCATGTTAAAGAGCATCTGTGAGGTTCTTGATTTGGAGAGATCAGGTGTAAATAGTGAACTAGTGAAGAGGATCTTGAATT…
0	hsa_circ_0075828	chr6:22020567-22020771	-5637698368	0.022533346	CASC15	ENSG00000272168	hsa_circLINC00340_027	+	204	ANNOTATED, INTERNAL, ncRNA, OVEXON	0.007640441	0.000188834	NA	hsa-miR-6868-3p:173.00, hsa-miR-6888-3p:163.00, hsa-miR-8068:162.00, hsa-miR-1273g-5p:159.00, hsa-miR-5582-5p:159.00, hsa-miR-6847-5p:159.00	GATCTGCATTTACTGCTCAACCACATCTAATTTGATGTCCTCTGCAGATTTAAAATGTGTGCCTTCTTTTCCGTCACCAAGTCATCCCTGGGTTACTACTGAACATCCTTCTCAATTCCCCCCGACCCATGGATGGCTGTTCTCCATTGTCTGTTTCACCAGATGTCCTCAAAACAAACAGACAGAAGAAGGAAGTGGCTAATG
0	hsa_circ_0075828	chr6:22020567-22020771	-689462322	4.84e-05	CASC15	ENSG00000272168	hsa_circLINC00340_027	+	204	ANNOTATED, INTERNAL, ncRNA, OVEXON	0.007640441	0.000188834	NA	hsa-miR-6868-3p:173.00, hsa-miR-6888-3p:163.00, hsa-miR-8068:162.00, hsa-miR-1273g-5p:159.00, hsa-miR-5582-5p:159.00, hsa-miR-6847-5p:159.00	GATCTGCATTTACTGCTCAACCACATCTAATTTGATGTCCTCTGCAGATTTAAAATGTGTGCCTTCTTTTCCGTCACCAAGTCATCCCTGGGTTACTACTGAACATCCTTCTCAATTCCCCCCGACCCATGGATGGCTGTTCTCCATTGTCTGTTTCACCAGATGTCCTCAAAACAAACAGACAGAAGAAGGAAGTGGCTAATG
0	hsa_circ_0075829	chr6:22020567-22056919	-4545950557	0.042950417	CASC15	ENSG00000272168	hsa_circLINC00340_029	+	349	ANNOTATED, INTERNAL, ncRNA, OVEXON	0.01395533	0.002135954	NA	hsa-miR-6868-3p:173.00, hsa-miR-6842-3p:167.00, hsa-miR-4763-3p:165.00, hsa-miR-6888-3p:163.00, hsa-miR-8068:162.00	GATCTGCATTTACTGCTCAACCACATCTAATTTGATGTCCTCTGCAGATTTAAAATGTGTGCCTTCTTTTCCGTCACCAAGTCATCCCTGGGTTACTACTGAACATCCTTCTCAATTCCCCCCGACCCATGGATGGCTGTTCTCCATTGTCTGTTTCACCAGATGTCCTCAAAACAAACAGACAGAAGAAGGAAGTGGCTAATGGAGCTGTGGAGTCCAAGTGTGACTGCCAAGAGGAATCCAGCAAAGCCAAAAAGCCCAAGCATGTAGCCCTGCCCGAAGCACGCCACACGCATGGAAAACCCAGAGGAAATGAGTGAGGATCAATGGGAAGAAGAGAGCCAGCCAG
0	hsa_circ_0131484	chr6:22056774-22063469	-4655592342	0.041072015	CASC15	ENSG00000272168	hsa_circLINC00340_038	+	6695	ALT_DONOR, INTERNAL, intronic, ncRNA, OVEXON	0.005870457	0.003200513	NA	hsa-miR-3916:928.00, hsa-miR-660-3p:633.00, hsa-miR-153-5p:630.00, hsa-miR-6876-5p:620.00, hsa-miR-5096:608.00	GAGCTGTGGAGTCCAAGTGTGACTGCCAAGAGGAATCCAGCAAAGCCAAAAAGCCCAAGCATGTAGCCCTGCCCGAAGCACGCCACACGCATGGAAAACCCAGAGGAAATGAGTGAGGATCAATGGGAAGAAGAGAGCCAGCCAGGTGAGCAAGCTCATCAGTCTGGAGGCTAGCGCCACTGGAAAGAGTCCCGGGCGGTTCTGTTTATTTGGCAAGTTCGGGCCATGACCTGAGCTTACACTAAATTACCTCAGAGCAAATTATTTTTTACCAAGCCACGTAAATGTTAGGTCGTCTCCCTAGAGCTTTTGGGCTGAAGACAGATGACTACATCAAAGGCTGCTCTTGAGTTTCCAGGTGTGGCTGGGGGAATTGTCTGTCTTCTTTCAGGAAAGGGT…
1012	hsa_circ_0001599	chr6:35586872-35610620	-5410313709	0.040636321	FKBP5	ENSG00000096060	hsa_circFKBP5_004	-	527	ANNOTATED, CDS, coding, INTERNAL, OVCODE, OVEXON, UTR5	0.900797243791745	0.176312483	NA	hsa-miR-561-5p:166.00, hsa-miR-6834-3p:166.00, hsa-miR-4677-5p:164.00, hsa-miR-7974:160.00, hsa-miR-222-5p:159.00, hsa-miR-29b-1-5p:159.00, hsa-miR-6511a-3p:159.00, hsa-miR-6731-3p:159.00	GTTCTCTACTTAAAAGACAATGACTACTGATGAAGGTGCCAAGAACAATGAAGAAAGCCCCACAGCCACTGTTGCTGAGCAGGGAGAGGATATTACCTCCAAAAAAGACAGGGGAGTATTAAAGATTGTCAAAAGAGTGGGGAATGGTGAGGAAACGCCGATGATTGGAGACAAAGTTTATGTCCATTACAAAGGAAAATTGTCAAATGGAAAGAAGTTTGATTCCAGTCATGATAGAAATGAACCATTTGTCTTTAGTCTTGGCAAAGGCCAAGTCATCAAGGCATGGGACATTGGGGTGGCTACCATGAAGAAAGGAGAGATATGCCATTTACTGTGCAAACCAGAATATGCATATGGCTCGGCTGGCAGTCTCCCTAAAATTCCCTCGAATGCAAC…
22229	hsa_circ_0008285	chr6:4891946-4892613	-2742605389	0.000453181	CDYL	ENSG00000153046	hsa_circCDYL_005	+	667	ANNOTATED, CDS, coding, INTERNAL, OVCODE, OVEXON	0.654095954541153	0.88527241	NA	hsa-miR-1180-3p:321.00, hsa-miR-4677-5p:305.00, hsa-miR-8085:301.00, hsa-miR-939-3p:172.00, hsa-miR-6868-3p:169.00	GTTGAAAGGATTGTTGACAAAAGGAAAAATAAAAAAGGGAAGACAGAGTATTTGGTTCGGTGGAAAGGCTATGACAGCGAGGACGACACTTGGGAGCCGGAACAGCACCTCGTGAACTGTGAGGAATACATCCACGACTTCAACAGACGCCACACGGAGAAGCAGAAGGAGAGCACATTGACCAGAACAAACAGGACCTCTCCCAACAATGCTAGGAAACAAATCTCCAGATCCACCAACAGCAACTTTTCTAAGACCTCTCCTAAGGCACTCGTGATTGGGAAAGACCACGAATCCAAAAACAGCCAGCTGTTTGCTGCCAGCCAGAAGTTCAGGAAGAACACAGCTCCATCTCTCTCCAGCCGGAAGAACATGGACCTAGCGAAGTCAGGTATCAAG…
22229	hsa_circ_0008285	chr6:4891946-4892613	-1973196487	0.000315195	CDYL	ENSG00000153046	hsa_circCDYL_005	+	667	ANNOTATED, CDS, coding, INTERNAL, OVCODE, OVEXON	0.654095954541153	0.88527241	NA	hsa-miR-1180-3p:321.00, hsa-miR-4677-5p:305.00, hsa-miR-8085:301.00, hsa-miR-939-3p:172.00, hsa-miR-6868-3p:169.00	GTTGAAAGGATTGTTGACAAAAGGAAAAATAAAAAAGGGAAGACAGAGTATTTGGTTCGGTGGAAAGGCTATGACAGCGAGGACGACACTTGGGAGCCGGAACAGCACCTCGTGAACTGTGAGGAATACATCCACGACTTCAACAGACGCCACACGGAGAAGCAGAAGGAGAGCACATTGACCAGAACAAACAGGACCTCTCCCAACAATGCTAGGAAACAAATCTCCAGATCCACCAACAGCAACTTTTCTAAGACCTCTCCTAAGGCACTCGTGATTGGGAAAGACCACGAATCCAAAAACAGCCAGCTGTTTGCTGCCAGCCAGAAGTTCAGGAAGAACACAGCTCCATCTCTCTCCAGCCGGAAGAACATGGACCTAGCGAAGTCAGGTATCAAG…
22229	hsa_circ_0008285	chr6:4891946-4892613	-2237561886	0.000254983	CDYL	ENSG00000153046	hsa_circCDYL_005	+	667	ANNOTATED, CDS, coding, INTERNAL, OVCODE, OVEXON	0.654095954541153	0.88527241	NA	hsa-miR-1180-3p:321.00, hsa-miR-4677-5p:305.00, hsa-miR-8085:301.00, hsa-miR-939-3p:172.00, hsa-miR-6868-3p:169.00	GTTGAAAGGATTGTTGACAAAAGGAAAAATAAAAAAGGGAAGACAGAGTATTTGGTTCGGTGGAAAGGCTATGACAGCGAGGACGACACTTGGGAGCCGGAACAGCACCTCGTGAACTGTGAGGAATACATCCACGACTTCAACAGACGCCACACGGAGAAGCAGAAGGAGAGCACATTGACCAGAACAAACAGGACCTCTCCCAACAATGCTAGGAAACAAATCTCCAGATCCACCAACAGCAACTTTTCTAAGACCTCTCCTAAGGCACTCGTGATTGGGAAAGACCACGAATCCAAAAACAGCCAGCTGTTTGCTGCCAGCCAGAAGTTCAGGAAGAACACAGCTCCATCTCTCTCCAGCCGGAAGAACATGGACCTAGCGAAGTCAGGTATCAAG…
22229	hsa_circ_0008285	chr6:4891946-4892613	-2719722858	0.0202158	CDYL	ENSG00000153046	hsa_circCDYL_005	+	667	ANNOTATED, CDS, coding, INTERNAL, OVCODE, OVEXON	0.654095954541153	0.88527241	NA	hsa-miR-1180-3p:321.00, hsa-miR-4677-5p:305.00, hsa-miR-8085:301.00, hsa-miR-939-3p:172.00, hsa-miR-6868-3p:169.00	GTTGAAAGGATTGTTGACAAAAGGAAAAATAAAAAAGGGAAGACAGAGTATTTGGTTCGGTGGAAAGGCTATGACAGCGAGGACGACACTTGGGAGCCGGAACAGCACCTCGTGAACTGTGAGGAATACATCCACGACTTCAACAGACGCCACACGGAGAAGCAGAAGGAGAGCACATTGACCAGAACAAACAGGACCTCTCCCAACAATGCTAGGAAACAAATCTCCAGATCCACCAACAGCAACTTTTCTAAGACCTCTCCTAAGGCACTCGTGATTGGGAAAGACCACGAATCCAAAAACAGCCAGCTGTTTGCTGCCAGCCAGAAGTTCAGGAAGAACACAGCTCCATCTCTCTCCAGCCGGAAGAACATGGACCTAGCGAAGTCAGGTATCAAG…
22229	hsa_circ_0008285	chr6:4891946-4892613	-1923055575	0.003164101	CDYL	ENSG00000153046	hsa_circCDYL_005	+	667	ANNOTATED, CDS, coding, INTERNAL, OVCODE, OVEXON	0.654095954541153	0.88527241	NA	hsa-miR-1180-3p:321.00, hsa-miR-4677-5p:305.00, hsa-miR-8085:301.00, hsa-miR-939-3p:172.00, hsa-miR-6868-3p:169.00	GTTGAAAGGATTGTTGACAAAAGGAAAAATAAAAAAGGGAAGACAGAGTATTTGGTTCGGTGGAAAGGCTATGACAGCGAGGACGACACTTGGGAGCCGGAACAGCACCTCGTGAACTGTGAGGAATACATCCACGACTTCAACAGACGCCACACGGAGAAGCAGAAGGAGAGCACATTGACCAGAACAAACAGGACCTCTCCCAACAATGCTAGGAAACAAATCTCCAGATCCACCAACAGCAACTTTTCTAAGACCTCTCCTAAGGCACTCGTGATTGGGAAAGACCACGAATCCAAAAACAGCCAGCTGTTTGCTGCCAGCCAGAAGTTCAGGAAGAACACAGCTCCATCTCTCTCCAGCCGGAAGAACATGGACCTAGCGAAGTCAGGTATCAAG…
2023	hsa_circ_0001730	chr7:100410368-100410830	-3964856588	0.005753167	EPHB4	ENSG00000196411	hsa_circEPHB4_014	-	362	ANNOTATED, CDS, coding, INTERNAL, OVCODE, OVEXON	0.772434174387481	0.020294378	NA	hsa-miR-6750-3p:311.00, hsa-miR-1182:309.00, hsa-miR-3907:170.00, hsa-miR-6862-5p:164.00, hsa-miR-4476:163.00	GTACTAAGGTCTACATCGACCCCTTCACTTATGAAGACCCTAATGAGGCTGTGAGGGAATTTGCAAAAGAGATCGATGTCTCCTACGTCAAGATTGAAGAGGTGATTGGTGCAGGTGAGTTTGGCGAGGTGTGCCGGGGGCGGCTCAAGGCCCCAGGGAAGAAGGAGAGCTGTGTGGCAATCAAGACCCTGAAGGGTGGCTACACGGAGCGGCAGCGGCGTGAGTTTCTGAGCGAGGCCTCCATCATGGGCCAGTTCGAGCACCCCAATATCATCCGCCTGGAGGGCGTGGTCACCAACAGCATGCCCGTCATGATTCTCACAGAGTTCATGGAGAACGGCGCCCTGGACTCCTTCCTGCGG
2023	hsa_circ_0001730	chr7:100410368-100410830	-3615249236	0.016206306	EPHB4	ENSG00000196411	hsa_circEPHB4_014	-	362	ANNOTATED, CDS, coding, INTERNAL, OVCODE, OVEXON	0.772434174387481	0.020294378	NA	hsa-miR-6750-3p:311.00, hsa-miR-1182:309.00, hsa-miR-3907:170.00, hsa-miR-6862-5p:164.00, hsa-miR-4476:163.00	GTACTAAGGTCTACATCGACCCCTTCACTTATGAAGACCCTAATGAGGCTGTGAGGGAATTTGCAAAAGAGATCGATGTCTCCTACGTCAAGATTGAAGAGGTGATTGGTGCAGGTGAGTTTGGCGAGGTGTGCCGGGGGCGGCTCAAGGCCCCAGGGAAGAAGGAGAGCTGTGTGGCAATCAAGACCCTGAAGGGTGGCTACACGGAGCGGCAGCGGCGTGAGTTTCTGAGCGAGGCCTCCATCATGGGCCAGTTCGAGCACCCCAATATCATCCGCCTGGAGGGCGTGGTCACCAACAGCATGCCCGTCATGATTCTCACAGAGTTCATGGAGAACGGCGCCCTGGACTCCTTCCTGCGG
2023	hsa_circ_0001730	chr7:100410368-100410830	-4197248232	0.048361617	EPHB4	ENSG00000196411	hsa_circEPHB4_014	-	362	ANNOTATED, CDS, coding, INTERNAL, OVCODE, OVEXON	0.772434174387481	0.020294378	NA	hsa-miR-6750-3p:311.00, hsa-miR-1182:309.00, hsa-miR-3907:170.00, hsa-miR-6862-5p:164.00, hsa-miR-4476:163.00	GTACTAAGGTCTACATCGACCCCTTCACTTATGAAGACCCTAATGAGGCTGTGAGGGAATTTGCAAAAGAGATCGATGTCTCCTACGTCAAGATTGAAGAGGTGATTGGTGCAGGTGAGTTTGGCGAGGTGTGCCGGGGGCGGCTCAAGGCCCCAGGGAAGAAGGAGAGCTGTGTGGCAATCAAGACCCTGAAGGGTGGCTACACGGAGCGGCAGCGGCGTGAGTTTCTGAGCGAGGCCTCCATCATGGGCCAGTTCGAGCACCCCAATATCATCCGCCTGGAGGGCGTGGTCACCAACAGCATGCCCGTCATGATTCTCACAGAGTTCATGGAGAACGGCGCCCTGGACTCCTTCCTGCGG
0	hsa_circ_0006919	chr7:121753171-121773795	-4920602247	0.016603491	AASS	ENSG00000008311	hsa_circAASS_005	-	1293	ANNOTATED, CDS, coding, INTERNAL, OVCODE, OVEXON, UTR5	1	0.977049842	chr6_23107139_23122737_-	hsa-miR-487a-3p:310.00, hsa-miR-6726-5p:307.00, hsa-miR-513b-3p:305.00, hsa-miR-4763-5p:170.00, hsa-miR-1203:168.00	TCACCAGGTGTCAAGATGCTGCAAGTACATAGGACTGGACTGGGCAGGCTGGGGGTCAGCCTCTCCAAGGGTCTTCACCACAAAGCTGTGTTGGCCGTCCGGAGGGAGGATGTGAACGCCTGGGAGAGAAGGGCCCCGCTAGCTCCCAAGCACATCAAAGGCATCACCAATCTGGGATACAAGGTCTTGATACAGCCTTCGAATCGGCGGGCCATTCATGATAAGGACTATGTCAAAGCTGGTGGCATTCTTCAGGAGGATATTTCTGAAGCTTGTCTAATTTTAGGAGTTAAAAGACCTCCAGAGGAAAAATTAATGTCCAGGAAGACTTATGCATTTTTCTCCCACACAATAAAAGCTCAGGAGGCCAATATGGGCTTGTTGGATGAGATTCTAAAA…
1102	hsa_circ_0082096	chr7:127013395-127017383	-4186853212	0.02446189	ZNF800	ENSG00000048405	hsa_circZNF800_005	-	1837	ANNOTATED, CDS, coding, INTERNAL, OVCODE, OVERLAPTX, OVEXON	0.9999999	0.997411303	NA	hsa-miR-8063:321.00, hsa-miR-1277-5p:312.00, hsa-miR-3164:310.00, hsa-miR-924:310.00, hsa-miR-518a-5p:308.00, hsa-miR-527:308.00	GAACTAAACAACTTAAGCATATTTTATTAAAAGATGTGGACACTATTTTTGAATGTAAGTTATGCCGCAGTCTCTTCAGAGGATTACCAAATTTAATTACCCATAAAAAATTCTACTGCCCACCAAGTCTCCAGATGGATGACAACCTTCCTGATGTAAATGATAAACAAAGCCAAGCCATAAATGATCTCCTAGAAGCCATATATCCAAGTGTGGACAAACGAGAATATATTATTAAGCTAGAACCCATAGAAACTAATCAAAATGCAGTATTTCAATATATTTCGAGGACTGATAATCCTATTGAAGTCACAGAGTCAAGCAGTACTCCTGAACAAACCGAAGTTCAGATACAGGAAACTAGCACTGAACAGTCAAAAACAGTACCGGTTACAGATA…
1012	hsa_circ_0079557	chr7:22306582-22357656	-4510691499	0.017477173	RAPGEF5	ENSG00000136237	hsa_circRAPGEF5_006	-	565	ANNOTATED, CDS, coding, INTERNAL, OVCODE, OVERLAPTX, OVEXON, UTR5	0.4735445	NA	chr12_117575554_117613429_+	hsa-miR-3187-3p:170.00, hsa-miR-6516-5p:165.00, hsa-miR-4778-3p:164.00, hsa-miR-7150:163.00, hsa-miR-582-3p:162.00	ACTCTATCAAGAAGAATATCTAATCCGTACCTTGAACATACGCCTTCCCAGATTTATGGAGAGAATTCTTCTTGTGCAGGAAGAGCATTGAGGAATATTATTATCGTTCAAGCAGCTGACCTGATAAAGGACAGAGTGAACCTCAAGGGGTTTTACAGGAGGAGCTGCGTTGGGTCAGAGCTGGTAGACTGGCTTCTAGAACACTGTCCTTTCGTCCAGTGCAGATCTATGGCCATAGGAGTCTGGCAACTCCTACTGGACATGGGAATTATGTTATCAGTGGACCAGCATCTATACTTTCAAGATACTTATGTTTTCTACCAGTTTTCCTCTGATGAATGTAGCTACTTGTACTGTGAATTTGAAAGAGAAGAAGAATGGCAAAATGGTGTCAAGCTT…
9873	hsa_circ_0001681	chr7:22330793-22357656	-2631694001	0.003294144	RAPGEF5	ENSG00000136237	hsa_circRAPGEF5_005	-	516	ANNOTATED, CDS, coding, INTERNAL, UTR5	0.99995667155107	0.000641746	chr12_117575554_117595307_+	hsa-miR-3187-3p:170.00, hsa-miR-6516-5p:165.00, hsa-miR-4778-3p:164.00, hsa-miR-7150:163.00, hsa-miR-582-3p:162.00	ACTCTATCAAGAAGAATATCTAATCCGTACCTTGAACATACGCCTTCCCAGATTTATGGAGAGAATTCTTCTTGTGCAGGAAGAGCATTGAGGAATATTATTATCGTTCAAGCAGCTGACCTGATAAAGGACAGAGTGAACCTCAAGGGGTTTTACAGGAGGAGCTGCGTTGGGTCAGAGCTGGTAGACTGGCTTCTAGAACACTGTCCTTTCGTCCAGTGCAGATCTATGGCCATAGGAGTCTGGCAACTCCTACTGGACATGGGAATTATGTTATCAGTGGACCAGCATCTATACTTTCAAGATACTTATGTTTTCTACCAGTTTTCCTCTGATGAATGTAGCTACTTGTACTGTGAATTTGAAAGAGAAGAAGAATGGCAAAATGGTGTCAAGCTT…
0	hsa_circ_0134225	chr7:3658711-3681737	-5209533627	0.009690261	SDK1	ENSG00000146555	hsa_circSDK1_006	+	415	ANNOTATED, CDS, coding, INTERNAL, OVCODE, OVEXON	0.1517765	NA	NA	hsa-miR-520f-5p:307.00, hsa-miR-519d-5p:171.00, hsa-miR-138-5p:168.00, hsa-miR-338-3p:162.00, hsa-miR-6764-3p:161.00	ATGATGTTGCTCCATATTTTAAAACGGAGCCAGGCCTACCACAGATCCACCTGGAAGGGAACCGCCTTGTTCTCACCTGCCTTGCCGAAGGGAGCTGGCCTTTGGAGTTCAAGTGGATGCGCGATGACAGTGAGCTCACCACCTACAGCAGCGAATATAAGTACATTATTCCATCTTTGCAGAAGCTCGATGCTGGGTTTTACCGCTGCGTGGTGCGAAACAGAATGGGAGCACTCCTGCAAAGAAAATCAGAAGTTCAAGTCGCATATATGGGAAGTTTCATGGATACGGACCAGAGGAAAACAGTTTCTCAAGGACGTGCAGCGATTCTAAACCTGCTGCCCATCACCAGCTACCCCAGACCTCAAGTGACTTGGTTTAGAGAAGGGCACAAGATTA…
0	hsa_circ_0008258	chr7:43436412-43447330	-5279004269	0.013193187	HECW1	ENSG00000002746	hsa_circHECW1_012	+	246	ANNOTATED, CDS, coding, INTERNAL, OVCODE, OVEXON	0.989980374997162	NA	NA	hsa-miR-6785-5p:179.00, hsa-miR-676-5p:175.00, hsa-miR-4753-3p:164.00, hsa-miR-204-5p:161.00, hsa-miR-3617-3p:161.00, hsa-miR-6855-5p:161.00	ATTTTTAAAAGCATTGGTGCTGATGAGACCGTCCAAGGACAAGGAAGTCGGAGGCTGATCAGCTTCTCTCTCTCAGATTTCCAAGCCATGGGGTTGAAGAAAGGGATGTTTTTCAACCCAGACCCTTATCTGAAGATTTCCATTCAGCCTGGGAAACACAGCATCTTCCCCGCCCTCCCTCACCATGGACAGGAGAGGAGATCCAAGATCATAGGCAACACCGTGAACCCCATCTGGCAGGCCGAG
1012	hsa_circ_0002111	chr8:18622958-18662408	-6663623303	4.46e-05	PSD3	ENSG00000156011	hsa_circPSD3_018	-	538	ANNOTATED, CDS, coding, INTERNAL, OVCODE, OVEXON	0.76638839823417	0.176312483	NA	hsa-miR-450b-5p:325.00, hsa-miR-548ah-3p:172.00, hsa-miR-548am-3p:172.00, hsa-miR-95-5p:166.00, hsa-miR-329-5p:164.00, hsa-miR-548aq-3p:164.00	CAATGCTGGGGTGAAAACAACACGGCTAGAAGCTCATTCTGAAATGGGGAGCACTGAAATTTTGGAAAAGGAGACCCCAGAAAATCTCAGTAATGGTACCAGCAGCAATGTGGAAGCAGCCAAAAGGTTGGCCAAACGCCTTTATCAGCTGGACAGATTCAAAAGATCAGATGTTGCAAAACACCTTGGCAAGAACAACGAATTTAGCAAACTAGTTGCAGAAGAATATCTGAAGTTTTTTGATTTTACAGGAATGACGCTGGATCAGTCACTCAGGTATTTCTTTAAAGCATTCTCTCTTGTGGGAGAAACTCAAGAACGAGAGAGAGTTTTAATACACTTCTCCAATAGATATTTTTATTGTAACCCAGATACCATTGCTTCACAAGATGGAGTCCA…
1012	hsa_circ_0002111	chr8:18622958-18662408	-730641746	2.11e-06	PSD3	ENSG00000156011	hsa_circPSD3_018	-	538	ANNOTATED, CDS, coding, INTERNAL, OVCODE, OVEXON	0.76638839823417	0.176312483	NA	hsa-miR-450b-5p:325.00, hsa-miR-548ah-3p:172.00, hsa-miR-548am-3p:172.00, hsa-miR-95-5p:166.00, hsa-miR-329-5p:164.00, hsa-miR-548aq-3p:164.00	CAATGCTGGGGTGAAAACAACACGGCTAGAAGCTCATTCTGAAATGGGGAGCACTGAAATTTTGGAAAAGGAGACCCCAGAAAATCTCAGTAATGGTACCAGCAGCAATGTGGAAGCAGCCAAAAGGTTGGCCAAACGCCTTTATCAGCTGGACAGATTCAAAAGATCAGATGTTGCAAAACACCTTGGCAAGAACAACGAATTTAGCAAACTAGTTGCAGAAGAATATCTGAAGTTTTTTGATTTTACAGGAATGACGCTGGATCAGTCACTCAGGTATTTCTTTAAAGCATTCTCTCTTGTGGGAGAAACTCAAGAACGAGAGAGAGTTTTAATACACTTCTCCAATAGATATTTTTATTGTAACCCAGATACCATTGCTTCACAAGATGGAGTCCA…
1012	hsa_circ_0002111	chr8:18622958-18662408	-5066262341	0.002086522	PSD3	ENSG00000156011	hsa_circPSD3_018	-	538	ANNOTATED, CDS, coding, INTERNAL, OVCODE, OVEXON	0.76638839823417	0.176312483	NA	hsa-miR-450b-5p:325.00, hsa-miR-548ah-3p:172.00, hsa-miR-548am-3p:172.00, hsa-miR-95-5p:166.00, hsa-miR-329-5p:164.00, hsa-miR-548aq-3p:164.00	CAATGCTGGGGTGAAAACAACACGGCTAGAAGCTCATTCTGAAATGGGGAGCACTGAAATTTTGGAAAAGGAGACCCCAGAAAATCTCAGTAATGGTACCAGCAGCAATGTGGAAGCAGCCAAAAGGTTGGCCAAACGCCTTTATCAGCTGGACAGATTCAAAAGATCAGATGTTGCAAAACACCTTGGCAAGAACAACGAATTTAGCAAACTAGTTGCAGAAGAATATCTGAAGTTTTTTGATTTTACAGGAATGACGCTGGATCAGTCACTCAGGTATTTCTTTAAAGCATTCTCTCTTGTGGGAGAAACTCAAGAACGAGAGAGAGTTTTAATACACTTCTCCAATAGATATTTTTATTGTAACCCAGATACCATTGCTTCACAAGATGGAGTCCA…
1012	hsa_circ_0002111	chr8:18622958-18662408	-6757487016	3.48e-05	PSD3	ENSG00000156011	hsa_circPSD3_018	-	538	ANNOTATED, CDS, coding, INTERNAL, OVCODE, OVEXON	0.76638839823417	0.176312483	NA	hsa-miR-450b-5p:325.00, hsa-miR-548ah-3p:172.00, hsa-miR-548am-3p:172.00, hsa-miR-95-5p:166.00, hsa-miR-329-5p:164.00, hsa-miR-548aq-3p:164.00	CAATGCTGGGGTGAAAACAACACGGCTAGAAGCTCATTCTGAAATGGGGAGCACTGAAATTTTGGAAAAGGAGACCCCAGAAAATCTCAGTAATGGTACCAGCAGCAATGTGGAAGCAGCCAAAAGGTTGGCCAAACGCCTTTATCAGCTGGACAGATTCAAAAGATCAGATGTTGCAAAACACCTTGGCAAGAACAACGAATTTAGCAAACTAGTTGCAGAAGAATATCTGAAGTTTTTTGATTTTACAGGAATGACGCTGGATCAGTCACTCAGGTATTTCTTTAAAGCATTCTCTCTTGTGGGAGAAACTCAAGAACGAGAGAGAGTTTTAATACACTTCTCCAATAGATATTTTTATTGTAACCCAGATACCATTGCTTCACAAGATGGAGTCCA…
1012	hsa_circ_0002111	chr8:18622958-18662408	-56921369	0.000932811	PSD3	ENSG00000156011	hsa_circPSD3_018	-	538	ANNOTATED, CDS, coding, INTERNAL, OVCODE, OVEXON	0.76638839823417	0.176312483	NA	hsa-miR-450b-5p:325.00, hsa-miR-548ah-3p:172.00, hsa-miR-548am-3p:172.00, hsa-miR-95-5p:166.00, hsa-miR-329-5p:164.00, hsa-miR-548aq-3p:164.00	CAATGCTGGGGTGAAAACAACACGGCTAGAAGCTCATTCTGAAATGGGGAGCACTGAAATTTTGGAAAAGGAGACCCCAGAAAATCTCAGTAATGGTACCAGCAGCAATGTGGAAGCAGCCAAAAGGTTGGCCAAACGCCTTTATCAGCTGGACAGATTCAAAAGATCAGATGTTGCAAAACACCTTGGCAAGAACAACGAATTTAGCAAACTAGTTGCAGAAGAATATCTGAAGTTTTTTGATTTTACAGGAATGACGCTGGATCAGTCACTCAGGTATTTCTTTAAAGCATTCTCTCTTGTGGGAGAAACTCAAGAACGAGAGAGAGTTTTAATACACTTCTCCAATAGATATTTTTATTGTAACCCAGATACCATTGCTTCACAAGATGGAGTCCA…
6047	hsa_circ_0004458	chr8:18656804-18662408	-4221026644	6.83e-08	PSD3	ENSG00000156011	hsa_circPSD3_017	-	448	ANNOTATED, CDS, coding, INTERNAL, OVCODE, OVEXON	0.651962961949799	0.050527018	NA	hsa-miR-548ah-3p:172.00, hsa-miR-548am-3p:172.00, hsa-miR-95-5p:166.00, hsa-miR-329-5p:164.00, hsa-miR-548aq-3p:164.00	CAATGCTGGGGTGAAAACAACACGGCTAGAAGCTCATTCTGAAATGGGGAGCACTGAAATTTTGGAAAAGGAGACCCCAGAAAATCTCAGTAATGGTACCAGCAGCAATGTGGAAGCAGCCAAAAGGTTGGCCAAACGCCTTTATCAGCTGGACAGATTCAAAAGATCAGATGTTGCAAAACACCTTGGCAAGAACAACGAATTTAGCAAACTAGTTGCAGAAGAATATCTGAAGTTTTTTGATTTTACAGGAATGACGCTGGATCAGTCACTCAGGTATTTCTTTAAAGCATTCTCTCTTGTGGGAGAAACTCAAGAACGAGAGAGAGTTTTAATACACTTCTCCAATAGATATTTTTATTGTAACCCAGATACCATTGCTTCACAAGATGGAGTCCA…
0	hsa_circ_0136098	chr8:18725183-18730243	-5399781218	0.002788095	PSD3	ENSG00000156011	hsa_circPSD3_004	-	1504	ANNOTATED, CDS, coding, INTERNAL, OVCODE, OVEXON	0.9999981	0.994835974	NA	hsa-miR-141-3p:323.00, hsa-miR-6873-3p:323.00, hsa-miR-4757-5p:322.00, hsa-miR-3142:319.00, hsa-miR-3160-3p:316.00	GTGATCATGGAGGAAGCACTTTACTCCCACCAAATGTCACAAATGAATTTCCAGAATATGGGACCATGGAGGAAGGTGGAGAAGGCCTAAGGGCTTCTCTGGAATTTGATGGTGAGGCTCTGCCATGCCACCCACAAGAGCAGCAGGGTGTCCAGCCTCTTACTGGCTGCCACTCTGGGCTCGACAGTGTTACAGAAGGACCAAAAGATGTCAGAGAGGCCCCCTCTCAAAGTCATCTCAAGGAACAAAGTTTACAGCCCATTGACTCTTTGATTTCAGCTCTGAAAGCCACAGAAGCCAGAATCATTTCCGGAACATTACAGGCTACAAAGGTACTGGACCAAGATGCTGTTTCTAGTTTTTCAGTTCAGCAGGTGGAAAAAGAGCTGGACACTGCCA…
0	hsa_circ_0136098	chr8:18725183-18730243	-5769138723	0.001484934	PSD3	ENSG00000156011	hsa_circPSD3_004	-	1504	ANNOTATED, CDS, coding, INTERNAL, OVCODE, OVEXON	0.9999981	0.994835974	NA	hsa-miR-141-3p:323.00, hsa-miR-6873-3p:323.00, hsa-miR-4757-5p:322.00, hsa-miR-3142:319.00, hsa-miR-3160-3p:316.00	GTGATCATGGAGGAAGCACTTTACTCCCACCAAATGTCACAAATGAATTTCCAGAATATGGGACCATGGAGGAAGGTGGAGAAGGCCTAAGGGCTTCTCTGGAATTTGATGGTGAGGCTCTGCCATGCCACCCACAAGAGCAGCAGGGTGTCCAGCCTCTTACTGGCTGCCACTCTGGGCTCGACAGTGTTACAGAAGGACCAAAAGATGTCAGAGAGGCCCCCTCTCAAAGTCATCTCAAGGAACAAAGTTTACAGCCCATTGACTCTTTGATTTCAGCTCTGAAAGCCACAGAAGCCAGAATCATTTCCGGAACATTACAGGCTACAAAGGTACTGGACCAAGATGCTGTTTCTAGTTTTTCAGTTCAGCAGGTGGAAAAAGAGCTGGACACTGCCA…
0	hsa_circ_0136098	chr8:18725183-18730243	-5483066533	0.000531383	PSD3	ENSG00000156011	hsa_circPSD3_004	-	1504	ANNOTATED, CDS, coding, INTERNAL, OVCODE, OVEXON	0.9999981	0.994835974	NA	hsa-miR-141-3p:323.00, hsa-miR-6873-3p:323.00, hsa-miR-4757-5p:322.00, hsa-miR-3142:319.00, hsa-miR-3160-3p:316.00	GTGATCATGGAGGAAGCACTTTACTCCCACCAAATGTCACAAATGAATTTCCAGAATATGGGACCATGGAGGAAGGTGGAGAAGGCCTAAGGGCTTCTCTGGAATTTGATGGTGAGGCTCTGCCATGCCACCCACAAGAGCAGCAGGGTGTCCAGCCTCTTACTGGCTGCCACTCTGGGCTCGACAGTGTTACAGAAGGACCAAAAGATGTCAGAGAGGCCCCCTCTCAAAGTCATCTCAAGGAACAAAGTTTACAGCCCATTGACTCTTTGATTTCAGCTCTGAAAGCCACAGAAGCCAGAATCATTTCCGGAACATTACAGGCTACAAAGGTACTGGACCAAGATGCTGTTTCTAGTTTTTCAGTTCAGCAGGTGGAAAAAGAGCTGGACACTGCCA…
0	hsa_circ_0003885	chr8:28570973-28575724	-5078869278	0.012076138	EXTL3	ENSG00000012232	hsa_circEXTL3_006	+	2717	ANNOTATED, CDS, coding, INTERNAL, OVCODE, OVEXON, UTR5	0.999999999976089	0.988391715	NA	hsa-miR-4776-5p:464.00, hsa-miR-103a-3p:459.00, hsa-miR-107:459.00, hsa-miR-1915-5p:454.00, hsa-miR-4710:452.00	GAGAGCAAGCCCTGGAGGTTCACTCTTTCAAGAAGTCGTGTGCTGAGGTGTAATGCTACACAAGTCAGAGGAAGGAAGGGTCCTGAAACACATGGCCTGATTGTTGGCAAAGGCATCATAAGAAGCTGGCATTTATTTCTGTTCTAACCTATTACTGTATAACTGTGAATAGACACTATGCATATTTGTTGGTCAGCAAAACCAAGAAACAAGAGCTATGGCATTTGAAAAAGTCTGTCTGATTCCAGGGTGTTTTTCCTGGGTTTCATCATCAGGTACCTCCTCCCTTTCATCTCAGCAAGAATGTGGCACCTTTTATCGTTTGATAAAGATTAAGGACATGTTCTTTGGTCAACAGCCAGAACTTAAAATCTGCTGGAATAGGGTCAGAGACCATTT…
1012	hsa_circ_0004425	chr9:103261046-103279053	-5203194831	0.009040601	MSANTD3-TMEFF1	ENSG00000251349	hsa_circTMEFF1_003	+	364	ANNOTATED, CDS, coding, INTERNAL, OVCODE, OVEXON	0.778424918182334	0.110866781	NA	hsa-miR-4732-3p:175.00, hsa-miR-544a:169.00, hsa-miR-877-3p:168.00, hsa-miR-1272:167.00, hsa-miR-6881-3p:164.00	AATTAAATGTGAGGGAGTCTGACGTAAGAGTTTGTGATGAGTCATCATGTAAATATGGAGGAGTCTGTAAAGAAGATGGAGATGGTTTGAAATGTGCATGCCAATTTCAGTGCCATACAAATTATATTCCTGTCTGTGGATCAAATGGGGACACTTATCAAAATGAATGCTTTCTCAGAAGGGCTGCTTGTAAGCACCAGAAAGAGATAACAGTAATAGCAAGAGGACCATGCTACTCTGATAATGGATCTGGATCTGGAGAAGGAGAAGAGGAAGGGTCAGGGGCAGAAGTTCACAGAAAACACTCCAAGTGTGGACCCTGCAAATATAAAGCTGAGTGTGATGAAGATGCAGAAAATGTTGG
10054	hsa_circ_0087046	chr9:37126308-37305711	-2116516782	0.016335111	ZCCHC7	ENSG00000147905	hsa_circZCCHC7_012	+	972	ANNOTATED, CDS, coding, INTERNAL, OVCODE, OVERLAPTX, OVEXON, UTR5	0.9995206	NA	NA	hsa-miR-29a-5p:315.00, hsa-miR-6844:309.00, hsa-miR-1236-3p:308.00, hsa-miR-489-3p:300.00, hsa-miR-6846-5p:171.00	CTTCAAGGTTACTGACTTTTTATGATGTTTGGTGGCTATGAGACTATAGAAGCATACGAAGATGATCTTTATCGAGATGAGTCATCTAGTGAACTGAGTGTTGATAGTGAGGTGGAATTTCAACTCTATAGCCAAATTCATTATGCCCAAGATCTTGATGATGTCATCAGGGAGGAAGAGCATGAAGAAAAGAACTCTGGGAATTCGGAATCTTCGAGTAGTAAACCAAATCAGAAGAAGCTAATCGTCCTTTCAGATAGTGAGGTCATCCAGCTGTCAGATGGGTCAGAGGTCATCACTTTGTCTGATGAAGACAGTATTTATAGATGTAAAGGAAAGAATGTTAGAGTTCAAGCACAAGAAAATGCCCATGGTCTTTCTTCTTCTCTTCAATCTAAT…
9156	hsa_circ_0087047	chr9:37126308-37327831	-2709081798	0.000584971	ZCCHC7	ENSG00000147905	hsa_circZCCHC7_013	+	1008	ANNOTATED, CDS, coding, INTERNAL, OVCODE, OVERLAPTX, OVEXON, UTR5	0.9996043	NA	NA	hsa-miR-29a-5p:315.00, hsa-miR-6844:309.00, hsa-miR-1236-3p:308.00, hsa-miR-489-3p:300.00, hsa-miR-6846-5p:171.00	CTTCAAGGTTACTGACTTTTTATGATGTTTGGTGGCTATGAGACTATAGAAGCATACGAAGATGATCTTTATCGAGATGAGTCATCTAGTGAACTGAGTGTTGATAGTGAGGTGGAATTTCAACTCTATAGCCAAATTCATTATGCCCAAGATCTTGATGATGTCATCAGGGAGGAAGAGCATGAAGAAAAGAACTCTGGGAATTCGGAATCTTCGAGTAGTAAACCAAATCAGAAGAAGCTAATCGTCCTTTCAGATAGTGAGGTCATCCAGCTGTCAGATGGGTCAGAGGTCATCACTTTGTCTGATGAAGACAGTATTTATAGATGTAAAGGAAAGAATGTTAGAGTTCAAGCACAAGAAAATGCCCATGGTCTTTCTTCTTCTCTTCAATCTAAT…
2.74	hsa_circ_0087051	chr9:37302184-37327831	-3102093109	0.035312544	ZCCHC7	ENSG00000147905	hsa_circZCCHC7_017	+	377	ANNOTATED, CDS, coding, INTERNAL, OVCODE, OVERLAPTX, OVEXON	0.3556145	NA	NA	hsa-miR-6846-5p:171.00, hsa-miR-203b-5p:165.00, hsa-miR-328-5p:163.00, hsa-miR-503-5p:162.00, hsa-miR-6718-5p:158.00, hsa-miR-6848-5p:158.00	GAGAAGATGGTATAAACTGGTCCATCAGTGACAAAGACATTGAGGCCCAGATAGCTAATAACCGAACACCTGGAAGATGGACCCAGCGGTACTATTCAGCCAACAAAAACATTATCTGTAGAAATTGTGACAAACGTGGTCATTTATCAAAAAACTGCCCCTTACCACGAAAAGTTCGTCGCTGCTTCCTGTGCTCCAGGAGAGGACATCTCCTGTATTCCTGTCCAGCCCCCCTTTGCGAATACTGTCCTGTGCCTAAGATGTTGGACCACTCATGTCTTTTCAGACATTCCTGGGATAAACAGTGTGACCGATGTCATATGCTAGGCCACTATACAGATGCTTGCACAGAAATCTGGAGGCAGTATCACCTAACG
0	hsa_circ_0001952	chrX:154018228-154020560	-4996373832	0.002279044	MPP1	ENSG00000269326	hsa_circMPP1_003	-	378	ANNOTATED, CDS, coding, INTERNAL, OVCODE, OVEXON	0.999959325196978	NA	NA	hsa-miR-612:174.00, hsa-miR-6836-5p:174.00, hsa-miR-6860:170.00, hsa-miR-23c:167.00, hsa-miR-130a-5p:164.00, hsa-miR-371a-5p:164.00	GCTGTATCGCATCCATTGAATACTGTGACCGAGGACATGTACACCAACGGGTCTCCTGCCCCAGGTAGCCCTGCCCAGGTCAAGGGACAGGAGGTGCGGAAAGTGCGACTCATACAGTTTGAGAAGGTCACAGAAGAGCCCATGGGAATCACGCTGAAGCTGAATGAAAAACAGTCCTGTACGGTGGCCAGAATTCTTCATGGTGGCATGATCCATAGACAAGGCTCCCTTCACGTGGGGGATGAGATCCTAGAAATCAATGGCACAAATGTGACAAATCATTCAGTGGATCAGCTGCAGAAGGCGATGAAAGAAACCAAAGGAATGATCTCATTAAAAGTAATTCCCAACCAGCAAAGCCGTCTTCCTGCACTACAG
15057	hsa_circ_0007108	chrX:24190831-24197887	-1954986416	0.041393054	ZFX	ENSG00000005889	hsa_circZFX_006	+	674	ANNOTATED, CDS, coding, INTERNAL, OVCODE, OVEXON, UTR5	0.992930986980688	0.995747391	chrX_94098282_94102380_-	hsa-miR-642b-3p:311.00, hsa-miR-642a-3p:307.00, hsa-miR-4793-5p:173.00, hsa-miR-3692-5p:168.00, hsa-miR-4518:167.00	GAGCTGTGACTGATGAGAATTAAAGGCCATGGATGAAGATGGGCTTGAATTACAACAAGAGCCAAACTCATTTTTTGATGCAACAGGAGCTGATGGTACACACATGGATGGTGATCAAATTGTTGTGGAAGTACAAGAAACTGTTTTTGTTTCAGATGTTGTGGATTCAGACATAACTGTGCATAACTTTGTTCCTGATGACCCAGATTCAGTTGTAATCCAAGATGTTATTGAGGACGTTGTTATAGAAGATGTTCAGTGCCCAGATATCATGGAAGAAGCAGATGTGTCTGAAACGGTCATCATTCCTGAGCAAGTGCTGGACTCAGATGTAACTGAAGAAGTTTCTTTAGCACATTGCACAGTCCCAGATGATGTTTTAGCTTCTGACATTACTTC…
0	hsa_circ_0089810	chrX:2637701-2644414	-5094956965	0.004003969	CD99	ENSG00000002586	hsa_circ_chrX_00012	+	6713	INTERGENIC	0.06347639	NA	NA	hsa-miR-3613-3p:940.00, hsa-miR-6849-3p:932.00, hsa-miR-619-5p:886.00, hsa-miR-6809-3p:764.00, hsa-miR-1273g-3p:706.00	GGGATGACTTTGACTTAGGAGATGCTGTTGTTGATGGAGAAAATGGTGAGTATTTTCCTTTAATCTCTTCTGCTGCTGATCTGCTTATTATCACCCAATTATGATCATTTCAGAGAGAATTCTCCCATTTAAATTATAAAGGGAACCAGTTTTCACAGTGGAAACCTAGGGAATAGGTGTGTCGGTTTGTTCTTGCTGTTGTCGTTGGGTTTTTCTTTACAACCAGTACGTGTGCTTTTATTTTAAAACTCTTACAGTCTTTGGAAGGACATGAGACAAATGTGCCTACCCTGGCCAGGGCTGGCTTCACCAGCATGTGACCTGTGCAGTGGCACAGGACCCCATGGCATGTTGGTTTGGCATGGGAACCATACTGGTTTACTGCTCTGTTGCCGCCAT…

## Sheet: Table S4_annotations_oRNAment
circRNA	position	RBP_ID	RBP_name	score
hsa_circ_0000119	0	377	SRSF1	0.115059
hsa_circ_0000119	3	104	Fusip1	0.141761
hsa_circ_0000119	3	341	Rnp4F	0.0881351
hsa_circ_0000119	3	197	mod	0.174786
hsa_circ_0000119	4	424	tra2	0.262007
hsa_circ_0000119	5	425	TRA2A	0.107257
hsa_circ_0000119	6	396	SRSF9	0.14044
hsa_circ_0000119	7	424	tra2	0.27669
hsa_circ_0000119	19	228	PABPN1L	0.0682502
hsa_circ_0000119	19	414	Tbg97295210	0.278604
hsa_circ_0000119	21	214	NUPL2	0.0630493
hsa_circ_0000119	21	175	KHDRBS3	1
hsa_circ_0000119	21	171	KHDRBS2	0.0965213
hsa_circ_0000119	21	170	KHDRBS2	0.303233
hsa_circ_0000119	21	164	IGF2BP3	0.162388
hsa_circ_0000119	21	252	PRR3	0.175661
hsa_circ_0000119	22	5	A1CF	0.665944
hsa_circ_0000119	22	173	KHDRBS2	0.747684
hsa_circ_0000119	23	169	KHDRBS1	0.253053
hsa_circ_0000119	24	429	TRNAU1AP	0.161798
hsa_circ_0000119	41	397	SRSF9	0.12908
hsa_circ_0000119	44	340	ref2	1
hsa_circ_0000119	51	57	EIF4B	0.285714
hsa_circ_0000119	54	396	SRSF9	0.14044
hsa_circ_0000119	55	424	tra2	1
hsa_circ_0000119	56	425	TRA2A	0.226622
hsa_circ_0000119	57	397	SRSF9	0.117141
hsa_circ_0000119	61	352	sf3b4	0.812631
hsa_circ_0000119	62	228	PABPN1L	0.139596
hsa_circ_0000119	63	214	NUPL2	0.221602
hsa_circ_0000119	64	105	Fusip1	0.224809
hsa_circ_0000119	64	104	Fusip1	0.141761
hsa_circ_0000119	64	214	NUPL2	0.251457
hsa_circ_0000119	64	187	LmjF354130	0.212094
hsa_circ_0000119	65	425	TRA2A	0.348363
hsa_circ_0000119	66	103	Fusip1	0.123426
hsa_circ_0000119	66	414	Tbg97295210	1
hsa_circ_0000119	66	430	TVAG002940	1
hsa_circ_0000119	66	222	PABPC1	1
hsa_circ_0000119	66	226	PABPC5	0.159773
hsa_circ_0000119	66	346	SART3	1
hsa_circ_0000119	68	74	ENSGALG00000000814	0.160262
hsa_circ_0000119	68	228	PABPN1L	0.164003
hsa_circ_0000119	68	213	NUPL2	0.516751
hsa_circ_0000119	68	226	PABPC5	0.136518
hsa_circ_0000119	69	127	HNRNPD	0.0730123
hsa_circ_0000119	70	214	NUPL2	0.0522016
hsa_circ_0000119	70	170	KHDRBS2	1
hsa_circ_0000119	70	322	RBM47	0.284776
hsa_circ_0000119	70	130	HNRNPDL	0.25378
hsa_circ_0000119	76	226	PABPC5	0.42301
hsa_circ_0000119	85	105	Fusip1	0.457491
hsa_circ_0000119	85	104	Fusip1	1
hsa_circ_0000119	85	341	Rnp4F	0.431229
hsa_circ_0000119	87	104	Fusip1	0.141761
hsa_circ_0000119	87	341	Rnp4F	0.0881351
hsa_circ_0000119	87	197	mod	0.174786
hsa_circ_0000119	98	400	SRSF11	0.235098
hsa_circ_0000119	99	379	SRSF2	0.204267
hsa_circ_0000119	102	226	PABPC5	0.491573
hsa_circ_0000119	104	163	IGF2BP2	0.195266
hsa_circ_0000119	104	164	IGF2BP3	0.325224
hsa_circ_0000119	109	72	ENOX1	1
hsa_circ_0000119	111	38	CNOT4	0.687193
hsa_circ_0000119	112	33	CNOT4	0.27265
hsa_circ_0000119	114	103	Fusip1	1
hsa_circ_0000119	114	106	Fusip1	1
hsa_circ_0000119	114	105	Fusip1	1
hsa_circ_0000119	114	104	Fusip1	0.346003
hsa_circ_0000119	114	341	Rnp4F	0.671286
hsa_circ_0000119	115	216	NUPL2	0.235171
hsa_circ_0000119	116	103	Fusip1	0.123426
hsa_circ_0000119	116	414	Tbg97295210	1
hsa_circ_0000119	116	430	TVAG002940	1
hsa_circ_0000119	116	222	PABPC1	1
hsa_circ_0000119	116	226	PABPC5	0.159773
hsa_circ_0000119	116	346	SART3	1
hsa_circ_0000119	118	228	PABPN1L	1
hsa_circ_0000119	118	213	NUPL2	1
hsa_circ_0000119	118	225	PABPC4	0.146764
hsa_circ_0000119	119	271	qkr58E1	0.171178
hsa_circ_0000119	119	214	NUPL2	0.0461362
hsa_circ_0000119	119	5	A1CF	0.237341
hsa_circ_0000119	119	170	KHDRBS2	0.281063
hsa_circ_0000119	119	164	IGF2BP3	0.109248
hsa_circ_0000119	120	77	ENSXETG00000007102	0.119898
hsa_circ_0000119	120	175	KHDRBS3	0.137598
hsa_circ_0000119	120	218	NUPL2	0.985113
hsa_circ_0000119	120	252	PRR3	0.455834
hsa_circ_0000119	124	120	HNRNPAB	0.074784
hsa_circ_0000119	137	214	NUPL2	0.250736
hsa_circ_0000119	138	320	RBM46	0.318757
hsa_circ_0000119	139	425	TRA2A	0.225668
hsa_circ_0000119	143	175	KHDRBS3	0.117647
hsa_circ_0000119	143	341	Rnp4F	0.213229
hsa_circ_0000119	144	277	RBM3	0.0513866
hsa_circ_0000119	144	173	KHDRBS2	1
hsa_circ_0000119	145	169	KHDRBS1	1
hsa_circ_0000119	146	228	PABPN1L	0.138979
hsa_circ_0000119	146	168	Khdrbs1	0.409528
hsa_circ_0000119	147	229	PABPN1L	0.428483
hsa_circ_0000119	148	104	Fusip1	0.270693
hsa_circ_0000119	148	214	NUPL2	0.0454532
hsa_circ_0000119	149	397	SRSF9	0.0642015
hsa_circ_0000119	150	103	Fusip1	0.488462
hsa_circ_0000119	150	106	Fusip1	0.421806
hsa_circ_0000119	150	105	Fusip1	0.274511
hsa_circ_0000119	150	104	Fusip1	0.153638
hsa_circ_0000119	151	395	SRSF9	0.486409
hsa_circ_0000119	152	55	egw109003261	1
hsa_circ_0000119	153	424	tra2	0.262007
hsa_circ_0000119	164	387	SRSF5	0.139903
hsa_circ_0000119	171	289	RBM6	0.452042
hsa_circ_0000119	176	257	PTBP3	0.175515
hsa_circ_0000119	177	242	pcbp2	0.160148
hsa_circ_0000119	181	236	PCBP2	0.102077
hsa_circ_0000119	182	142	hnRNPK	0.119657
hsa_circ_0000119	190	372	Srp54	0.50372
hsa_circ_0000119	190	57	EIF4B	0.5
hsa_circ_0000119	199	81	ESRP1	0.115379
hsa_circ_0000119	200	359	SFPQ	0.376124
hsa_circ_0000119	200	80	ESRP1	0.0854625
hsa_circ_0000119	200	167	ILF2	0.178371
hsa_circ_0000119	201	396	SRSF9	0.149679
hsa_circ_0000119	201	86	EWSR1	0.0386642
hsa_circ_0000119	202	208	NCU02404	0.308081
hsa_circ_0000119	202	81	ESRP1	0.151149
hsa_circ_0000119	212	425	TRA2A	0.290457
hsa_circ_0000119	213	227	PABPN1	0.759405
hsa_circ_0000119	220	91	Fmr1	0.108753
hsa_circ_0000119	223	8	ANIA04546	0.247793
hsa_circ_0000119	224	252	PRR3	0.335081
hsa_circ_0000119	227	260	pUf68	0.0831859
hsa_circ_0000119	229	103	Fusip1	0.349339
hsa_circ_0000119	229	106	Fusip1	0.332931
hsa_circ_0000119	229	105	Fusip1	0.752084
hsa_circ_0000119	229	104	Fusip1	0.660694
hsa_circ_0000119	229	341	Rnp4F	0.289478
hsa_circ_0000119	229	401	SRSF11	1
hsa_circ_0000119	231	103	Fusip1	1
hsa_circ_0000119	231	106	Fusip1	1
hsa_circ_0000119	231	105	Fusip1	1
hsa_circ_0000119	231	104	Fusip1	0.346003
hsa_circ_0000119	231	341	Rnp4F	0.671286
hsa_circ_0000119	232	216	NUPL2	0.235171
hsa_circ_0000119	233	207	NAB2CONSTRUCT	0.130041
hsa_circ_0000119	233	430	TVAG002940	0.671653
hsa_circ_0000119	236	214	NUPL2	0.180759
hsa_circ_0000119	237	342	RO3G00049	0.172201
hsa_circ_0000119	238	394	SRSF9	1
hsa_circ_0000119	241	228	PABPN1L	0.100581
hsa_circ_0000119	241	216	NUPL2	0.233156
hsa_circ_0000119	242	77	ENSXETG00000007102	0.221492
hsa_circ_0000119	242	228	PABPN1L	0.0963892
hsa_circ_0000119	242	226	PABPC5	0.277716
hsa_circ_0000119	242	79	ENSXETG00000018075	0.184445
hsa_circ_0000119	243	74	ENSGALG00000000814	0.160262
hsa_circ_0000119	243	228	PABPN1L	0.164003
hsa_circ_0000119	243	213	NUPL2	0.516751
hsa_circ_0000119	243	226	PABPC5	0.136518
hsa_circ_0000119	244	127	HNRNPD	0.0730123
hsa_circ_0000119	245	214	NUPL2	0.0522016
hsa_circ_0000119	245	170	KHDRBS2	1
hsa_circ_0000119	245	322	RBM47	0.284776
hsa_circ_0000119	245	130	HNRNPDL	0.25378
hsa_circ_0000119	246	175	KHDRBS3	0.193984
hsa_circ_0000119	246	173	KHDRBS2	0.18375
hsa_circ_0000119	250	104	Fusip1	0.270693
hsa_circ_0000119	250	214	NUPL2	0.0454532
hsa_circ_0000119	255	76	ENSGALG00000014267	0.928274
hsa_circ_0000119	255	78	ENSXETG00000012802	0.22338
hsa_circ_0000119	258	76	ENSGALG00000014267	0.664977
hsa_circ_0000119	258	78	ENSXETG00000012802	0.483233
hsa_circ_0000119	267	195	MBNL1	0.164429
hsa_circ_0000119	271	149	Hrb27C	0.0565562
hsa_circ_0000119	275	51	DAZAP1	0.113819
hsa_circ_0000119	278	337	RC3H1	0.0875659
hsa_circ_0000119	280	260	pUf68	0.0492348
hsa_circ_0000119	282	91	Fmr1	0.0867773
hsa_circ_0000119	289	260	pUf68	0.0726247
hsa_circ_0000119	291	29	CG7804	0.277954
hsa_circ_0000119	291	80	ESRP1	0.135627
hsa_circ_0000119	291	133	HNRNPF	0.103621
hsa_circ_0000119	291	304	RBM25	0.195932
hsa_circ_0000119	292	165	ILF2	0.960815
hsa_circ_0000119	292	137	HNRNPH2	0.130259
hsa_circ_0000119	292	132	HNRNPF	0.762506
hsa_circ_0000119	292	86	EWSR1	1
hsa_circ_0000119	292	284	RBM4B	0.11142
hsa_circ_0000119	292	268	PUM1	1
hsa_circ_0000119	293	81	ESRP1	0.183117
hsa_circ_0000119	294	372	Srp54	0.225083
hsa_circ_0000119	295	83	ESRP2	0.219415
hsa_circ_0000119	299	8	ANIA04546	0.247793
hsa_circ_0000119	304	253	PRR3	1
hsa_circ_0000119	314	8	ANIA04546	0.147076
hsa_circ_0000119	316	337	RC3H1	0.136891
hsa_circ_0000119	323	288	RBM5	0.0941407
hsa_circ_0000119	323	214	NUPL2	0.0801773
hsa_circ_0000119	324	394	SRSF9	0.242544
hsa_circ_0000119	324	91	Fmr1	0.0704844
hsa_circ_0000119	328	214	NUPL2	0.118759
hsa_circ_0000119	329	91	Fmr1	0.52691
hsa_circ_0000119	334	292	RBM6	0.0388281
hsa_circ_0000119	334	243	PCBP4	0.0686024
hsa_circ_0000119	335	299	RBM23	0.250692
hsa_circ_0000119	335	157	IGF2BP1	1
hsa_circ_0000119	336	161	IGF2BP2	0.280649
hsa_circ_0000119	340	210	NOVA1	0.0336637
hsa_circ_0000119	340	347	SF1	0.166426
hsa_circ_0000119	342	50	DAZAP1	0.116396
hsa_circ_0000119	345	273	RALYL	0.0394508
hsa_circ_0000119	345	336	RC3H1	0.076546
hsa_circ_0000119	346	360	shep	0.181596
hsa_circ_0000119	346	404	sup26CONSTRUCT	0.402122
hsa_circ_0000119	346	362	shep	0.201361
hsa_circ_0000119	347	260	pUf68	0.0618579
hsa_circ_0000119	349	57	EIF4B	0.428571
hsa_circ_0000119	369	387	SRSF5	0.0980007
hsa_circ_0000119	371	212	NOVA1	0.0931617
hsa_circ_0000119	375	411	Tbg97234300	0.920452
hsa_circ_0000119	376	129	HNRNPD	0.319357
hsa_circ_0000119	377	201	MSI1	0.342974
hsa_circ_0000119	378	416	Tbg9721117950CONS	1
hsa_circ_0000119	378	198	msi	0.294281
hsa_circ_0000119	380	202	MSI1	0.105769
hsa_circ_0000119	383	273	RALYL	0.0333513
hsa_circ_0000119	388	149	Hrb27C	0.0565562
hsa_circ_0000119	393	206	mubCONSTRUCT	0.129024
hsa_circ_0000119	397	419	TIA1	0.0625096
hsa_circ_0000119	398	99	FUBP3	0.210204
hsa_circ_0000119	398	273	RALYL	0.0592894
hsa_circ_0000119	398	295	RBM15B	0.06767
hsa_circ_0000119	398	95	FUBP1	0.0589897
hsa_circ_0000119	398	296	RBM15B	0.0704846
hsa_circ_0000119	398	124	HNRNPCL1	0.0744571
hsa_circ_0000119	398	327	RBMS3	0.447077
hsa_circ_0000119	399	324	RBMS2	0.497212
hsa_circ_0000119	400	361	shep	0.0549616
hsa_circ_0000119	400	210	NOVA1	0.159567
hsa_circ_0000119	400	336	RC3H1	0.112274
hsa_circ_0000119	411	209	NOVA1	0.0581795
hsa_circ_0000119	418	76	ENSGALG00000014267	0.701816
hsa_circ_0000119	418	78	ENSXETG00000012802	0.725376
hsa_circ_0000119	421	450	ZNF326	1
hsa_circ_0000119	428	202	MSI1	0.105668
hsa_circ_0000119	428	203	MSI1	0.126
hsa_circ_0000119	428	204	MSI1	0.107499
hsa_circ_0000119	445	219	NUPL2	0.983929
hsa_circ_0000119	448	319	Rbm45	0.170015
hsa_circ_0000119	449	216	NUPL2	0.365617
hsa_circ_0000119	458	67	ELAVL1	0.49248
hsa_circ_0000119	458	273	RALYL	0.0995975
hsa_circ_0000119	462	48	DAZ3	0.0254301
hsa_circ_0000119	466	303	RBM24	1
hsa_circ_0000119	466	29	CG7804	0.521846
hsa_circ_0000119	466	403	sup12	0.469104
hsa_circ_0000119	466	13	AT1G76460TAIRG	1
hsa_circ_0000119	466	409	TARDBP	0.229083
hsa_circ_0000119	478	359	SFPQ	0.0442632
hsa_circ_0000119	482	431	TVAG129710	0.128492
hsa_circ_0000119	482	24	CELF1	0.247672
hsa_circ_0000119	484	338	RC3H1	0.907638
hsa_circ_0000119	485	302	RBM24	0.0798114
hsa_circ_0000119	486	273	RALYL	0.110418
hsa_circ_0000119	486	65	ELAVL1	0.0706931
hsa_circ_0000119	486	22	BRUNOL6	0.193369
hsa_circ_0000119	486	95	FUBP1	0.122736
hsa_circ_0000119	486	10	aret	0.204277
hsa_circ_0000119	486	21	BRUNOL5	0.33426
hsa_circ_0000119	486	20	BRUNOL4	0.460571
hsa_circ_0000119	486	230	papi	0.216033
hsa_circ_0000119	486	16	BOLL	0.655773
hsa_circ_0000119	486	98	FUBP1	1
hsa_circ_0000119	487	302	RBM24	0.1953
hsa_circ_0000119	488	431	TVAG129710	0.45208
hsa_circ_0000119	489	47	DAZ3	0.150162
hsa_circ_0000119	497	212	NOVA1	0.0851592
hsa_circ_0000119	507	419	TIA1	0.236289
hsa_circ_0000119	507	178	KHSRP	0.112906
hsa_circ_0000119	507	18	BOLL	0.162351
hsa_circ_0000119	508	273	RALYL	0.0960051
hsa_circ_0000119	508	418	TIA1	0.0841063
hsa_circ_0000119	508	336	RC3H1	0.0863854
hsa_circ_0000119	508	295	RBM15B	0.110474
hsa_circ_0000119	508	95	FUBP1	0.0783586
hsa_circ_0000119	508	296	RBM15B	0.071295
hsa_circ_0000119	510	260	pUf68	0.0477398
hsa_circ_0000119	513	183	LIN28A	0.112917
hsa_circ_0000119	525	398	SRSF10	0.489633
hsa_circ_0000119	525	379	SRSF2	0.313523
hsa_circ_0000119	525	389	SRSF5	0.50828
hsa_circ_0000119	526	391	SRSF8	0.159982
hsa_circ_0000119	530	361	shep	0.132318
hsa_circ_0000119	530	210	NOVA1	0.0838836
hsa_circ_0000119	530	336	RC3H1	0.282941
hsa_circ_0000119	531	129	HNRNPD	0.312756
hsa_circ_0000119	535	8	ANIA04546	0.146969
hsa_circ_0000119	537	210	NOVA1	0.111612
hsa_circ_0000119	537	290	RBM6	0.19116
hsa_circ_0000119	542	393	SRSF9	0.327476
hsa_circ_0000119	543	397	SRSF9	0.122907
hsa_circ_0000119	543	182	LIN28A	0.16895
hsa_circ_0000119	543	371	SNRPA	0.166667
hsa_circ_0000119	543	382	SRSF2	1
hsa_circ_0000119	546	104	Fusip1	0.214564
hsa_circ_0000119	546	377	SRSF1	0.112167
hsa_circ_0000119	546	341	Rnp4F	0.131293
hsa_circ_0000119	547	393	SRSF9	0.260825
hsa_circ_0000119	548	397	SRSF9	0.0581084
hsa_circ_0000119	548	371	SNRPA	1
hsa_circ_0000119	548	382	SRSF2	0.388863
hsa_circ_0000119	551	402	STARPAP	0.0768077
hsa_circ_0000119	553	404	sup26CONSTRUCT	0.216828
hsa_circ_0000119	555	365	SNRNP70	0.294461
hsa_circ_0000119	561	173	KHDRBS2	0.245759
hsa_circ_0000119	565	214	NUPL2	0.0508809
hsa_circ_0000119	566	400	SRSF11	0.22148
hsa_circ_0000119	567	383	SRSF4	0.953707
hsa_circ_0000119	584	226	PABPC5	0.240691
hsa_circ_0000119	591	241	PCBP2	0.237389
hsa_circ_0000119	591	237	PCBP2	0.0881031
hsa_circ_0000119	591	243	PCBP4	0.107465
hsa_circ_0000119	601	347	SF1	0.669621
hsa_circ_0000119	603	159	IGF2BP2	0.0986063
hsa_circ_0000119	605	363	sm	0.242095
hsa_circ_0000119	605	145	HNRNPL	0.298696
hsa_circ_0000119	605	33	CNOT4	0.241773
hsa_circ_0000119	607	217	NUPL2	0.227357
hsa_circ_0000119	608	8	ANIA04546	0.0994333
hsa_circ_0000119	608	292	RBM6	0.0482922
hsa_circ_0000119	631	29	CG7804	0.1141
hsa_circ_0000119	631	167	ILF2	0.16802
hsa_circ_0010023	0	372	Srp54	0.227525
hsa_circ_0010023	0	135	HNRNPH2	0.126568
hsa_circ_0010023	0	88	EWSR1	0.148477
hsa_circ_0010023	1	29	CG7804	0.145049
hsa_circ_0010023	6	210	NOVA1	0.032277
hsa_circ_0010023	6	162	IGF2BP2	0.0775768
hsa_circ_0010023	7	314	RBM45	0.361799
hsa_circ_0010023	8	141	HNRNPK	0.292308
hsa_circ_0010023	10	212	NOVA1	1
hsa_circ_0010023	43	342	RO3G00049	0.176272
hsa_circ_0010023	44	83	ESRP2	0.125102
hsa_circ_0010023	46	377	SRSF1	0.115059
hsa_circ_0010023	57	91	Fmr1	0.778858
hsa_circ_0010023	58	72	ENOX1	0.134328
hsa_circ_0010023	66	76	ENSGALG00000014267	0.928274
hsa_circ_0010023	66	78	ENSXETG00000012802	0.22338
hsa_circ_0010023	69	76	ENSGALG00000014267	0.928274
hsa_circ_0010023	69	78	ENSXETG00000012802	0.22338
hsa_circ_0010023	75	407	TAF15	0.137424
hsa_circ_0010023	76	236	PCBP2	0.108989
hsa_circ_0010023	76	241	PCBP2	0.115412
hsa_circ_0010023	77	299	RBM23	0.0872008
hsa_circ_0010023	85	289	RBM6	0.0886823
hsa_circ_0010023	89	142	hnRNPK	0.0796298
hsa_circ_0010023	90	159	IGF2BP2	0.519893
hsa_circ_0010023	90	164	IGF2BP3	0.141119
hsa_circ_0010023	90	156	IGF2BP1	0.28133
hsa_circ_0010023	92	33	CNOT4	0.139117
hsa_circ_0010023	93	210	NOVA1	0.227773
hsa_circ_0010023	93	162	IGF2BP2	1
hsa_circ_0010023	93	158	IGF2BP1	1
hsa_circ_0010023	96	334	Rbp1like	0.276232
hsa_circ_0010023	100	217	NUPL2	0.507855
hsa_circ_0010023	130	241	PCBP2	0.237389
hsa_circ_0010023	130	237	PCBP2	0.0881031
hsa_circ_0010023	130	243	PCBP4	0.107465
hsa_circ_0010023	149	391	SRSF8	0.0519337
hsa_circ_0010023	151	398	SRSF10	0.0947368
hsa_circ_0010023	151	379	SRSF2	0.115117
hsa_circ_0010023	152	391	SRSF8	0.244525
hsa_circ_0010023	188	345	SAMD4A	0.293155
hsa_circ_0010023	202	142	hnRNPK	0.482383
hsa_circ_0010023	202	242	pcbp2	0.137305
hsa_circ_0010023	202	237	PCBP2	0.477655
hsa_circ_0010023	202	243	PCBP4	0.588942
hsa_circ_0010023	203	292	RBM6	0.232545
hsa_circ_0010023	203	231	PCBP1	0.0879675
hsa_circ_0010023	224	42	cpo	0.431997
hsa_circ_0010023	224	366	SNRPA	0.729378
hsa_circ_0010023	227	210	NOVA1	0.0343245
hsa_circ_0010023	227	292	RBM6	0.0436561
hsa_circ_0010023	228	164	IGF2BP3	0.146667
hsa_circ_0010023	229	293	RBM6	0.308074
hsa_circ_0010023	250	209	NOVA1	0.215212
hsa_circ_0010023	254	288	RBM5	0.0711145
hsa_circ_0010023	255	393	SRSF9	0.196326
hsa_circ_0010023	256	182	LIN28A	0.110726
hsa_circ_0010023	272	3	A1CF	0.219134
hsa_circ_0010023	274	192	MBNL1	0.120544
hsa_circ_0010023	275	391	SRSF8	0.0732568
hsa_circ_0010023	278	345	SAMD4A	1
hsa_circ_0010023	278	58	EIF4B	0.545455
hsa_circ_0010023	295	444	ZC3H10	0.187868
hsa_circ_0010023	299	387	SRSF5	1
hsa_circ_0010023	299	141	HNRNPK	0.96063
hsa_circ_0010023	302	159	IGF2BP2	0.0983757
hsa_circ_0010023	302	144	HNRNPL	0.22142
hsa_circ_0010023	302	141	HNRNPK	0.305903
hsa_circ_0010023	312	138	HNRNPK	0.148218
hsa_circ_0010023	315	236	PCBP2	0.0636741
hsa_circ_0010023	315	241	PCBP2	0.0879128
hsa_circ_0010023	315	233	PCBP1	1
hsa_circ_0010023	316	241	PCBP2	0.25255
hsa_circ_0010023	321	210	NOVA1	0.0347678
hsa_circ_0010023	321	162	IGF2BP2	0.218077
hsa_circ_0010023	322	146	HNRNPL	0.180572
hsa_circ_0010023	324	379	SRSF2	0.113628
hsa_circ_0010023	338	380	SRSF2	1
hsa_circ_0000192	1	3	A1CF	0.168995
hsa_circ_0000192	4	197	mod	0.141285
hsa_circ_0000192	9	320	RBM46	0.487892
hsa_circ_0000192	12	31	CG17838	0.518768
hsa_circ_0000192	18	8	ANIA04546	0.117705
hsa_circ_0000192	19	239	PCBP2	0.459055
hsa_circ_0000192	23	175	KHDRBS3	0.057425
hsa_circ_0000192	23	144	HNRNPL	0.0920347
hsa_circ_0000192	23	177	KHDRBS3	0.20487
hsa_circ_0000192	25	171	KHDRBS2	0.292958
hsa_circ_0000192	26	168	Khdrbs1	0.228744
hsa_circ_0000192	27	228	PABPN1L	0.81427
hsa_circ_0000192	27	213	NUPL2	0.438292
hsa_circ_0000192	27	414	Tbg97295210	0.295592
hsa_circ_0000192	27	225	PABPC4	0.151521
hsa_circ_0000192	28	214	NUPL2	0.221602
hsa_circ_0000192	29	105	Fusip1	0.224809
hsa_circ_0000192	29	104	Fusip1	0.141761
hsa_circ_0000192	29	214	NUPL2	0.251457
hsa_circ_0000192	29	187	LmjF354130	0.212094
hsa_circ_0000192	31	414	Tbg97295210	0.437848
hsa_circ_0000192	38	209	NOVA1	0.215212
hsa_circ_0000192	42	159	IGF2BP2	0.0933086
hsa_circ_0000192	42	210	NOVA1	0.0281334
hsa_circ_0000192	42	156	IGF2BP1	0.0912176
hsa_circ_0000192	42	144	HNRNPL	0.370619
hsa_circ_0000192	45	210	NOVA1	0.0312038
hsa_circ_0000192	45	162	IGF2BP2	0.218242
hsa_circ_0000192	45	158	IGF2BP1	0.970526
hsa_circ_0000192	52	393	SRSF9	0.196326
hsa_circ_0000192	53	182	LIN28A	0.514298
hsa_circ_0000192	54	377	SRSF1	0.0957083
hsa_circ_0000192	55	277	RBM3	0.07703
hsa_circ_0000192	55	425	TRA2A	0.207892
hsa_circ_0000192	56	227	PABPN1	0.723618
hsa_circ_0000192	58	397	SRSF9	0.0642015
hsa_circ_0000192	59	103	Fusip1	1
hsa_circ_0000192	59	106	Fusip1	1
hsa_circ_0000192	59	105	Fusip1	1
hsa_circ_0000192	59	104	Fusip1	0.346003
hsa_circ_0000192	59	341	Rnp4F	0.671286
hsa_circ_0000192	64	196	mec8	0.7947
hsa_circ_0000192	64	42	cpo	0.801732
hsa_circ_0000192	64	366	SNRPA	0.263667
hsa_circ_0000192	72	56	eIF2alpha	0.38422
hsa_circ_0000192	74	288	RBM5	0.0711145
hsa_circ_0000192	75	393	SRSF9	0.196326
hsa_circ_0000192	82	236	PCBP2	0.6119
hsa_circ_0000192	82	241	PCBP2	0.486173
hsa_circ_0000192	82	237	PCBP2	0.137111
hsa_circ_0000192	82	243	PCBP4	0.292814
hsa_circ_0000192	83	299	RBM23	0.145734
hsa_circ_0000192	83	241	PCBP2	0.132238
hsa_circ_0000192	83	289	RBM6	0.0870867
hsa_circ_0000192	86	236	PCBP2	0.109647
hsa_circ_0000192	86	241	PCBP2	0.122783
hsa_circ_0000192	92	394	SRSF9	1
hsa_circ_0000192	102	86	EWSR1	0.0386848
hsa_circ_0000192	114	347	SF1	0.177154
hsa_circ_0000192	127	337	RC3H1	0.0820667
hsa_circ_0000192	128	90	exc7	0.159066
hsa_circ_0000192	129	16	BOLL	0.237551
hsa_circ_0000192	134	165	ILF2	0.135787
hsa_circ_0000192	134	183	LIN28A	0.273359
hsa_circ_0000192	134	132	HNRNPF	0.115079
hsa_circ_0000192	134	86	EWSR1	0.274476
hsa_circ_0000192	135	375	SRSF1	0.649426
hsa_circ_0000192	135	374	SRSF1	0.284649
hsa_circ_0000192	135	14	B52	0.727608
hsa_circ_0000192	135	376	SRSF1	0.662356
hsa_circ_0000192	135	373	SRSF1	0.224469
hsa_circ_0000192	135	372	Srp54	0.225083
hsa_circ_0000192	137	91	Fmr1	0.114417
hsa_circ_0000192	138	277	RBM3	0.0902832
hsa_circ_0000192	147	291	RBM6	0.294636
hsa_circ_0000192	157	89	EWSR1	0.190985
hsa_circ_0000192	158	58	EIF4B	0.272727
hsa_circ_0000192	160	397	SRSF9	0.0558007
hsa_circ_0000192	190	86	EWSR1	0.0388156
hsa_circ_0000192	191	208	NCU02404	0.308081
hsa_circ_0000192	191	81	ESRP1	0.151149
hsa_circ_0000192	193	182	LIN28A	0.110726
hsa_circ_0000192	196	303	RBM24	0.424506
hsa_circ_0000192	196	13	AT1G76460TAIRG	0.41115
hsa_circ_0000192	196	410	TARDBP	0.239333
hsa_circ_0000192	213	91	Fmr1	0.778858
hsa_circ_0000192	214	72	ENOX1	0.134328
hsa_circ_0000192	215	107	FXR2	0.236512
hsa_circ_0000192	216	38	CNOT4	0.687193
hsa_circ_0000192	223	142	hnRNPK	0.482383
hsa_circ_0000192	223	242	pcbp2	0.137305
hsa_circ_0000192	223	237	PCBP2	0.477655
hsa_circ_0000192	223	243	PCBP4	0.588942
hsa_circ_0000192	224	289	RBM6	0.0885839
hsa_circ_0000192	231	316	RBM45	1
hsa_circ_0000192	232	217	NUPL2	0.366921
hsa_circ_0000192	236	215	NUPL2	0.218191
hsa_circ_0000192	241	397	SRSF9	0.123954
hsa_circ_0012152	4	260	pUf68	0.170899
hsa_circ_0012152	4	204	MSI1	0.134762
hsa_circ_0012152	4	393	SRSF9	0.401466
hsa_circ_0012152	5	165	ILF2	0.136633
hsa_circ_0012152	5	183	LIN28A	0.153285
hsa_circ_0012152	5	351	SF2	0.300206
hsa_circ_0012152	5	132	HNRNPF	0.115753
hsa_circ_0012152	5	86	EWSR1	0.275551
hsa_circ_0012152	5	382	SRSF2	0.379258
hsa_circ_0012152	6	375	SRSF1	0.649426
hsa_circ_0012152	6	374	SRSF1	0.284649
hsa_circ_0012152	6	14	B52	0.727608
hsa_circ_0012152	6	376	SRSF1	0.662356
hsa_circ_0012152	6	373	SRSF1	0.224469
hsa_circ_0012152	6	372	Srp54	0.225083
hsa_circ_0012152	7	287	RBM5	0.315161
hsa_circ_0012152	8	394	SRSF9	0.240861
hsa_circ_0012152	12	320	RBM46	0.241784
hsa_circ_0012152	15	242	pcbp2	0.18917
hsa_circ_0012152	23	349	SF1	0.183399
hsa_circ_0012152	23	358	SFPQ	0.182367
hsa_circ_0012152	25	131	HNRNPDL	1
hsa_circ_0012152	28	242	pcbp2	0.160148
hsa_circ_0012152	32	236	PCBP2	0.0636741
hsa_circ_0012152	33	237	PCBP2	0.246132
hsa_circ_0012152	33	243	PCBP4	0.0723605
hsa_circ_0012152	33	140	HNRNPK	0.226649
hsa_circ_0012152	34	138	HNRNPK	0.148218
hsa_circ_0012152	41	8	ANIA04546	0.457698
hsa_circ_0012152	44	74	ENSGALG00000000814	0.201576
hsa_circ_0012152	59	236	PCBP2	0.0766243
hsa_circ_0012152	59	407	TAF15	0.198538
hsa_circ_0012152	60	299	RBM23	0.145734
hsa_circ_0012152	60	241	PCBP2	0.132238
hsa_circ_0012152	60	289	RBM6	0.0870867
hsa_circ_0012152	63	236	PCBP2	0.6119
hsa_circ_0012152	63	241	PCBP2	0.486173
hsa_circ_0012152	63	237	PCBP2	0.137111
hsa_circ_0012152	63	243	PCBP4	0.292814
hsa_circ_0012152	64	299	RBM23	0.106681
hsa_circ_0012152	64	241	PCBP2	0.140683
hsa_circ_0012152	70	394	SRSF9	0.131815
hsa_circ_0012152	70	133	HNRNPF	0.136086
hsa_circ_0012152	101	33	CNOT4	0.147916
hsa_circ_0012152	103	414	Tbg97295210	0.437848
hsa_circ_0012152	105	104	Fusip1	0.270693
hsa_circ_0012152	105	214	NUPL2	0.0454532
hsa_circ_0012152	117	91	Fmr1	0.0779276
hsa_circ_0012152	121	164	IGF2BP3	0.0986525
hsa_circ_0012152	121	315	RBM45	0.769492
hsa_circ_0012152	143	288	RBM5	0.158806
hsa_circ_0012152	144	393	SRSF9	0.196326
hsa_circ_0012152	145	182	LIN28A	0.514298
hsa_circ_0012152	160	233	PCBP1	0.120087
hsa_circ_0012152	161	142	hnRNPK	0.0618761
hsa_circ_0012152	161	235	PCBP1	0.468415
hsa_circ_0012152	161	242	pcbp2	0.195775
hsa_circ_0012152	161	241	PCBP2	1
hsa_circ_0012152	161	237	PCBP2	1
hsa_circ_0012152	161	243	PCBP4	1
hsa_circ_0012152	162	138	HNRNPK	0.100789
hsa_circ_0012152	165	236	PCBP2	0.102077
hsa_circ_0012152	166	142	hnRNPK	1
hsa_circ_0012152	166	237	PCBP2	0.242522
hsa_circ_0012152	166	243	PCBP4	0.104322
hsa_circ_0012152	166	290	RBM6	0.100703
hsa_circ_0012152	167	245	PCBP4	0.288683
hsa_circ_0012152	168	206	mubCONSTRUCT	0.090954
hsa_circ_0012152	178	292	RBM6	0.232545
hsa_circ_0012152	178	231	PCBP1	0.0879675
hsa_circ_0012152	179	234	PCBP1	0.116182
hsa_circ_0012152	232	142	hnRNPK	0.482383
hsa_circ_0012152	232	242	pcbp2	0.137305
hsa_circ_0012152	232	237	PCBP2	0.477655
hsa_circ_0012152	232	243	PCBP4	0.588942
hsa_circ_0012152	233	289	RBM6	0.0885839
hsa_circ_0012152	242	391	SRSF8	0.174345
hsa_circ_0012152	243	400	SRSF11	0.179529
hsa_circ_0012152	244	398	SRSF10	0.197116
hsa_circ_0012152	244	379	SRSF2	0.224218
hsa_circ_0012152	244	389	SRSF5	0.997404
hsa_circ_0012152	250	319	Rbm45	0.0668426
hsa_circ_0012152	257	412	Tbg97262300	0.0903331
hsa_circ_0012152	258	66	ELAVL1	0.0839562
hsa_circ_0012152	259	359	SFPQ	0.225406
hsa_circ_0012152	259	412	Tbg97262300	0.0637992
hsa_circ_0012152	259	19	bru3	0.422414
hsa_circ_0012152	273	44	DAZ3	0.480859
hsa_circ_0012152	278	92	FMR1	0.3506
hsa_circ_0012152	282	91	Fmr1	0.211053
hsa_circ_0012152	291	336	RC3H1	0.054697
hsa_circ_0012152	295	273	RALYL	0.129551
hsa_circ_0012152	301	212	NOVA1	0.0950482
hsa_circ_0012152	314	242	pcbp2	0.110381
hsa_circ_0012152	327	24	CELF1	0.0675561
hsa_circ_0012152	328	326	RBMS2	0.200361
hsa_circ_0012152	329	155	HRP1	0.397216
hsa_circ_0012152	343	167	ILF2	0.184259
hsa_circ_0012152	344	165	ILF2	0.131279
hsa_circ_0012152	344	132	HNRNPF	0.088262
hsa_circ_0012152	344	86	EWSR1	0.285793
hsa_circ_0012152	345	81	ESRP1	0.183117
hsa_circ_0012152	346	359	SFPQ	0.114744
hsa_circ_0012152	347	135	HNRNPH2	0.155172
hsa_circ_0012152	347	88	EWSR1	1
hsa_circ_0012152	348	166	ILF2	0.200088
hsa_circ_0012152	348	80	ESRP1	0.183002
hsa_circ_0012152	360	297	RBM15B	0.0958322
hsa_circ_0012152	361	412	Tbg97262300	0.222325
hsa_circ_0012152	373	359	SFPQ	0.126193
hsa_circ_0012152	376	242	pcbp2	0.746567
hsa_circ_0012152	379	407	TAF15	0.276716
hsa_circ_0012152	380	236	PCBP2	0.0658573
hsa_circ_0012152	380	241	PCBP2	0.0642903
hsa_circ_0012152	380	386	SRSF5	0.169484
hsa_circ_0012152	385	259	PUF60	0.191061
hsa_circ_0012152	388	257	PTBP3	0.054666
hsa_circ_0012152	391	23	CADANIAG00004740	0.164324
hsa_circ_0012152	392	248	PFF0320c	0.146415
hsa_circ_0012152	396	292	RBM6	0.439092
hsa_circ_0012152	396	390	SRSF5	0.985466
hsa_circ_0012152	398	299	RBM23	0.0858574
hsa_circ_0012152	400	236	PCBP2	0.122221
hsa_circ_0012152	402	292	RBM6	0.0695705
hsa_circ_0012152	414	299	RBM23	0.188141
hsa_circ_0012152	414	407	TAF15	0.234363
hsa_circ_0012152	414	157	IGF2BP1	0.374036
hsa_circ_0012152	414	35	CNOT4	0.613714
hsa_circ_0012152	415	241	PCBP2	0.0667107
hsa_circ_0012152	415	292	RBM6	0.0802384
hsa_circ_0012152	415	161	IGF2BP2	0.754809
hsa_circ_0012152	417	239	PCBP2	0.326865
hsa_circ_0012152	420	74	ENSGALG00000000814	0.365838
hsa_circ_0012152	427	202	MSI1	0.172884
hsa_circ_0012152	427	120	HNRNPAB	0.11544
hsa_circ_0012152	430	369	SNRPA	1
hsa_circ_0012152	430	370	SNRPA	1
hsa_circ_0012152	434	292	RBM6	0.140156
hsa_circ_0012152	435	239	PCBP2	0.465372
hsa_circ_0012152	438	163	IGF2BP2	0.145401
hsa_circ_0012152	438	164	IGF2BP3	0.117195
hsa_circ_0012152	438	290	RBM6	0.0985944
hsa_circ_0012152	439	2	A1CF	0.579649
hsa_circ_0012152	440	320	RBM46	0.217557
hsa_circ_0012152	444	409	TARDBP	0.399303
hsa_circ_0012152	453	320	RBM46	0.293003
hsa_circ_0012152	457	359	SFPQ	0.0638852
hsa_circ_0012152	459	81	ESRP1	0.115919
hsa_circ_0012152	460	359	SFPQ	0.808921
hsa_circ_0012152	460	19	bru3	1
hsa_circ_0012152	461	308	Rbm38	0.185284
hsa_circ_0012152	461	88	EWSR1	0.121522
hsa_circ_0012152	462	29	CG7804	0.182604
hsa_circ_0012152	462	13	AT1G76460TAIRG	0.338153
hsa_circ_0012152	462	20	BRUNOL4	0.125046
hsa_circ_0012152	463	86	EWSR1	0.179716
hsa_circ_0012152	463	308	Rbm38	0.236837
hsa_circ_0012152	464	260	pUf68	0.0653194
hsa_circ_0012152	464	22	BRUNOL6	0.964878
hsa_circ_0012152	465	359	SFPQ	0.0533525
hsa_circ_0012152	465	86	EWSR1	0.0568674
hsa_circ_0012152	467	305	RBM25	0.109687
hsa_circ_0012152	473	48	DAZ3	0.04832
hsa_circ_0012152	487	299	RBM23	0.0858574
hsa_circ_0012152	493	183	LIN28A	0.200189
hsa_circ_0012152	495	319	Rbm45	0.108493
hsa_circ_0012152	496	397	SRSF9	0.118026
hsa_circ_0012152	502	132	HNRNPF	0.0607924
hsa_circ_0012152	502	86	EWSR1	0.0995222
hsa_circ_0012152	556	363	sm	0.124359
hsa_circ_0012152	556	37	Cnot4	0.253874
hsa_circ_0012152	556	33	CNOT4	0.832856
hsa_circ_0012152	564	299	RBM23	0.187816
hsa_circ_0012152	564	241	PCBP2	0.0915456
hsa_circ_0012152	564	407	TAF15	0.0648521
hsa_circ_0012152	565	161	IGF2BP2	1
hsa_circ_0012152	566	239	PCBP2	0.61365
hsa_circ_0012152	567	386	SRSF5	0.097129
hsa_circ_0012152	576	192	MBNL1	0.197175
hsa_circ_0012152	585	391	SRSF8	0.0460999
hsa_circ_0012152	586	400	SRSF11	0.149454
hsa_circ_0012152	596	288	RBM5	0.0941407
hsa_circ_0012152	596	214	NUPL2	0.0801773
hsa_circ_0012152	615	33	CNOT4	0.201362
hsa_circ_0012152	617	391	SRSF8	0.0534398
hsa_circ_0012152	631	299	RBM23	0.188141
hsa_circ_0012152	631	407	TAF15	0.234363
hsa_circ_0012152	631	157	IGF2BP1	0.374036
hsa_circ_0012152	631	35	CNOT4	0.613714
hsa_circ_0012152	632	241	PCBP2	0.0667107
hsa_circ_0012152	632	292	RBM6	0.0802384
hsa_circ_0012152	632	161	IGF2BP2	0.754809
hsa_circ_0012152	643	172	KHDRBS2	1
hsa_circ_0012152	662	83	ESRP2	0.125102
hsa_circ_0012152	664	396	SRSF9	0.14044
hsa_circ_0012152	665	424	tra2	1
hsa_circ_0012152	666	425	TRA2A	1
hsa_circ_0012152	667	227	PABPN1	0.759405
hsa_circ_0012152	671	427	TRNAU1AP	0.181214
hsa_circ_0012152	671	274	RALYL	0.357536
hsa_circ_0012152	672	428	TRNAU1AP	0.140992
hsa_circ_0012152	672	364	Smp067420	0.127702
hsa_circ_0012152	672	420	TIA1	0.206998
hsa_circ_0012152	672	123	HNRNPC	0.517828
hsa_circ_0012152	672	84	estExtfgeneshHS	0.309672
hsa_circ_0012152	672	126	HNRNPCL1	0.45486
hsa_circ_0012152	672	18	BOLL	0.35063
hsa_circ_0012152	673	124	HNRNPCL1	0.0785467
hsa_circ_0012152	704	396	SRSF9	0.125075
hsa_circ_0012152	716	234	PCBP1	0.178907
hsa_circ_0012152	716	138	HNRNPK	0.104525
hsa_circ_0012152	721	183	LIN28A	0.0846158
hsa_circ_0012152	724	397	SRSF9	0.0573394
hsa_circ_0012152	732	91	Fmr1	0.108753
hsa_circ_0012152	735	38	CNOT4	1
hsa_circ_0012300	12	387	SRSF5	0.140507
hsa_circ_0012300	15	8	ANIA04546	0.60448
hsa_circ_0012300	32	391	SRSF8	0.174345
hsa_circ_0012300	34	383	SRSF4	1
hsa_circ_0012300	43	214	NUPL2	0.0453229
hsa_circ_0012300	44	214	NUPL2	0.116035
hsa_circ_0012300	44	197	mod	0.725856
hsa_circ_0012300	49	320	RBM46	0.318757
hsa_circ_0012300	51	396	SRSF9	0.260509
hsa_circ_0012300	52	288	RBM5	0.0875952
hsa_circ_0012300	52	373	SRSF1	0.367377
hsa_circ_0012300	52	287	RBM5	0.190949
hsa_circ_0012300	53	91	Fmr1	0.52691
hsa_circ_0012300	54	72	ENOX1	0.303802
hsa_circ_0012300	57	44	DAZ3	0.505685
hsa_circ_0012300	60	48	DAZ3	0.0801781
hsa_circ_0012300	62	273	RALYL	0.110418
hsa_circ_0012300	62	65	ELAVL1	0.0706931
hsa_circ_0012300	62	95	FUBP1	0.122849
hsa_circ_0012300	63	412	Tbg97262300	0.102509
hsa_circ_0012300	64	124	HNRNPCL1	0.0593204
hsa_circ_0012300	66	273	RALYL	0.0768742
hsa_circ_0012300	66	124	HNRNPCL1	0.0480753
hsa_circ_0012300	66	259	PUF60	1
hsa_circ_0012300	76	396	SRSF9	0.27448
hsa_circ_0012300	77	391	SRSF8	0.0460999
hsa_circ_0012300	78	400	SRSF11	0.149454
hsa_circ_0012300	92	135	HNRNPH2	0.126436
hsa_circ_0012300	92	83	ESRP2	0.11815
hsa_circ_0012300	92	86	EWSR1	0.0900813
hsa_circ_0012300	92	88	EWSR1	0.156566
hsa_circ_0012300	92	133	HNRNPF	0.140181
hsa_circ_0012300	93	166	ILF2	0.0861209
hsa_circ_0012300	93	135	HNRNPH2	0.146687
hsa_circ_0012300	93	86	EWSR1	0.0429771
hsa_circ_0012300	93	136	HNRNPH2	0.337091
hsa_circ_0012300	94	166	ILF2	0.134803
hsa_circ_0012300	94	135	HNRNPH2	0.183271
hsa_circ_0012300	94	83	ESRP2	0.114298
hsa_circ_0012300	94	82	ESRP1	0.468626
hsa_circ_0012300	98	273	RALYL	0.0394508
hsa_circ_0012300	107	29	CG7804	0.16269
hsa_circ_0012300	107	393	SRSF9	0.194078
hsa_circ_0012300	107	80	ESRP1	0.103774
hsa_circ_0012300	107	133	HNRNPF	1
hsa_circ_0012300	107	304	RBM25	0.194095
hsa_circ_0012300	107	117	HNRNPA2B1	0.282573
hsa_circ_0012300	108	165	ILF2	0.127663
hsa_circ_0012300	108	396	SRSF9	0.778084
hsa_circ_0012300	108	183	LIN28A	0.194686
hsa_circ_0012300	108	351	SF2	0.778199
hsa_circ_0012300	108	137	HNRNPH2	0.210081
hsa_circ_0012300	108	132	HNRNPF	0.109973
hsa_circ_0012300	108	86	EWSR1	0.130951
hsa_circ_0012300	109	375	SRSF1	1
hsa_circ_0012300	109	374	SRSF1	0.615943
hsa_circ_0012300	109	14	B52	0.427627
hsa_circ_0012300	109	376	SRSF1	0.772452
hsa_circ_0012300	109	377	SRSF1	1
hsa_circ_0012300	109	373	SRSF1	0.46116
hsa_circ_0012300	109	208	NCU02404	0.711195
hsa_circ_0012300	110	393	SRSF9	0.360809
hsa_circ_0012300	110	80	ESRP1	0.0653967
hsa_circ_0012300	112	372	Srp54	0.430365
hsa_circ_0012300	119	91	Fmr1	0.108753
hsa_circ_0012300	123	74	ENSGALG00000000814	0.326602
hsa_circ_0012300	124	79	ENSXETG00000018075	0.179921
hsa_circ_0012300	127	30	CG7903	0.496802
hsa_circ_0012300	130	286	RBM4B	0.314133
hsa_circ_0012300	172	187	LmjF354130	0.131106
hsa_circ_0012300	173	164	IGF2BP3	0.259107
hsa_circ_0012300	173	222	PABPC1	0.237498
hsa_circ_0012300	173	346	SART3	0.238271
hsa_circ_0012300	174	74	ENSGALG00000000814	0.175544
hsa_circ_0012300	174	77	ENSXETG00000007102	0.139127
hsa_circ_0012300	174	79	ENSXETG00000018075	0.431997
hsa_circ_0012300	175	77	ENSXETG00000007102	0.127001
hsa_circ_0012300	175	228	PABPN1L	0.164152
hsa_circ_0012300	175	213	NUPL2	0.885858
hsa_circ_0012300	175	79	ENSXETG00000018075	0.177243
hsa_circ_0012300	182	288	RBM5	0.0796482
hsa_circ_0012300	183	394	SRSF9	0.142896
hsa_circ_0012300	183	133	HNRNPF	0.303571
hsa_circ_0012300	184	371	SNRPA	0.0909091
hsa_circ_0012300	190	328	RBMS3	0.283714
hsa_circ_0012300	190	325	RBMS2	0.205887
hsa_circ_0012300	192	311	RBM41	0.684722
hsa_circ_0012300	192	273	RALYL	0.0333513
hsa_circ_0012300	192	309	RBM41	0.364368
hsa_circ_0012300	202	30	CG7903	0.99783
hsa_circ_0012300	205	286	RBM4B	0.312121
hsa_circ_0012300	207	89	EWSR1	0.173931
hsa_circ_0012300	207	137	HNRNPH2	0.12007
hsa_circ_0012300	207	86	EWSR1	0.0906172
hsa_circ_0012300	208	288	RBM5	0.0656838
hsa_circ_0012300	208	287	RBM5	0.101026
hsa_circ_0012300	210	29	CG7804	0.16269
hsa_circ_0012300	210	393	SRSF9	0.194078
hsa_circ_0012300	210	80	ESRP1	0.103774
hsa_circ_0012300	210	133	HNRNPF	1
hsa_circ_0012300	210	304	RBM25	0.194095
hsa_circ_0012300	210	117	HNRNPA2B1	0.282573
hsa_circ_0012300	211	165	ILF2	0.127248
hsa_circ_0012300	211	396	SRSF9	0.261817
hsa_circ_0012300	211	137	HNRNPH2	0.209108
hsa_circ_0012300	211	132	HNRNPF	0.109574
hsa_circ_0012300	211	86	EWSR1	0.13068
hsa_circ_0012300	218	228	PABPN1L	0.0681296
hsa_circ_0012300	218	349	SF1	0.502642
hsa_circ_0012300	219	271	qkr58E1	1
hsa_circ_0012300	219	360	shep	0.264408
hsa_circ_0012300	219	127	HNRNPD	0.0655897
hsa_circ_0012300	219	129	HNRNPD	0.70312
hsa_circ_0012300	220	252	PRR3	0.208758
hsa_circ_0012300	222	71	ELAVL4	0.222417
hsa_circ_0012300	223	149	Hrb27C	0.0674197
hsa_circ_0012300	223	150	Hrb27C	0.184415
hsa_circ_0012300	223	46	DAZ3	0.453735
hsa_circ_0012300	223	52	DAZAP1	1
hsa_circ_0012300	227	271	qkr58E1	0.16124
hsa_circ_0012300	227	127	HNRNPD	0.171933
hsa_circ_0012300	227	1	A1CF	0.148331
hsa_circ_0012300	228	175	KHDRBS3	0.395199
hsa_circ_0012300	228	171	KHDRBS2	0.376691
hsa_circ_0012300	228	170	KHDRBS2	0.0840812
hsa_circ_0012300	228	50	DAZAP1	0.0543169
hsa_circ_0012300	228	130	HNRNPDL	0.13823
hsa_circ_0012300	229	5	A1CF	0.177957
hsa_circ_0012300	246	137	HNRNPH2	0.138212
hsa_circ_0012300	246	86	EWSR1	0.0432473
hsa_circ_0012300	253	99	FUBP3	0.0822444
hsa_circ_0012300	261	301	RBM24	1
hsa_circ_0012300	262	254	PTBP1	1
hsa_circ_0012300	262	255	PTBP1	0.195025
hsa_circ_0012300	262	124	HNRNPCL1	0.0680029
hsa_circ_0012300	262	412	Tbg97262300	0.158355
hsa_circ_0012300	262	257	PTBP3	0.1642
hsa_circ_0012300	281	273	RALYL	0.0363692
hsa_circ_0012300	281	70	ELAVL4	0.0942964
hsa_circ_0012300	281	429	TRNAU1AP	0.147715
hsa_circ_0012300	281	419	TIA1	0.092459
hsa_circ_0012300	281	296	RBM15B	1
hsa_circ_0012300	282	127	HNRNPD	0.0601608
hsa_circ_0012300	285	48	DAZ3	0.124683
hsa_circ_0012300	289	81	ESRP1	0.115379
hsa_circ_0012300	290	359	SFPQ	0.376124
hsa_circ_0012300	290	80	ESRP1	0.0854625
hsa_circ_0012300	290	167	ILF2	0.178371
hsa_circ_0012300	291	396	SRSF9	0.149679
hsa_circ_0012300	291	86	EWSR1	0.0386642
hsa_circ_0012300	292	208	NCU02404	0.308081
hsa_circ_0012300	292	81	ESRP1	0.151149
hsa_circ_0012300	300	446	ZCRB1	0.208069
hsa_circ_0012300	302	347	SF1	0.264559
hsa_circ_0012300	313	212	NOVA1	1
hsa_circ_0012300	315	432	TVAG267990	1
hsa_circ_0012300	325	191	MBNL1	0.0652363
hsa_circ_0012300	336	160	IGF2BP2	0.17478
hsa_circ_0012300	337	142	hnRNPK	0.0682748
hsa_circ_0012300	337	242	pcbp2	0.238768
hsa_circ_0012300	337	243	PCBP4	0.137981
hsa_circ_0012300	337	245	PCBP4	0.943782
hsa_circ_0012300	338	234	PCBP1	0.194118
hsa_circ_0012300	342	142	hnRNPK	0.0744877
hsa_circ_0012300	348	359	SFPQ	0.0641879
hsa_circ_0012300	355	391	SRSF8	0.0564809
hsa_circ_0012300	378	277	RBM3	0.061217
hsa_circ_0012300	381	164	IGF2BP3	0.126426
hsa_circ_0012300	387	397	SRSF9	0.203102
hsa_circ_0012300	391	44	DAZ3	0.480859
hsa_circ_0012300	393	453	ZNF638	0.111569
hsa_circ_0012300	399	228	PABPN1L	0.138979
hsa_circ_0012300	399	168	Khdrbs1	0.409528
hsa_circ_0012300	400	214	NUPL2	0.221602
hsa_circ_0012300	401	104	Fusip1	0.214564
hsa_circ_0012300	401	214	NUPL2	0.0425952
hsa_circ_0012300	401	424	tra2	0.287245
hsa_circ_0012300	402	425	TRA2A	1
hsa_circ_0012300	403	227	PABPN1	0.759405
hsa_circ_0012300	407	277	RBM3	0.0991654
hsa_circ_0012300	408	271	qkr58E1	0.129598
hsa_circ_0012300	409	131	HNRNPDL	1
hsa_circ_0012300	410	361	shep	0.0639502
hsa_circ_0012300	411	404	sup26CONSTRUCT	0.209743
hsa_circ_0012300	416	391	SRSF8	0.0460999
hsa_circ_0012300	419	391	SRSF8	0.0652822
hsa_circ_0012300	421	199	msi	0.332325
hsa_circ_0012300	421	416	Tbg9721117950CONS	0.371809
hsa_circ_0012300	421	198	msi	1
hsa_circ_0012300	421	205	msiCONSTRUCT	0.807788
hsa_circ_0012300	422	372	Srp54	1
hsa_circ_0012300	423	149	Hrb27C	0.37351
hsa_circ_0012300	423	150	Hrb27C	0.24229
hsa_circ_0012300	423	53	DAZAP1	0.619504
hsa_circ_0012300	427	228	PABPN1L	0.100313
hsa_circ_0012300	427	171	KHDRBS2	0.110355
hsa_circ_0012300	428	77	ENSXETG00000007102	0.219782
hsa_circ_0012300	428	228	PABPN1L	0.0965648
hsa_circ_0012300	428	207	NAB2CONSTRUCT	0.237038
hsa_circ_0012300	428	222	PABPC1	0.186469
hsa_circ_0012300	428	187	LmjF354130	0.16932
hsa_circ_0012300	428	346	SART3	0.187757
hsa_circ_0012300	428	225	PABPC4	0.153505
hsa_circ_0012300	429	228	PABPN1L	0.0610116
hsa_circ_0012300	438	228	PABPN1L	0.0682502
hsa_circ_0012300	438	425	TRA2A	0.203497
hsa_circ_0012300	458	393	SRSF9	0.327476
hsa_circ_0012300	459	397	SRSF9	0.43535
hsa_circ_0012300	459	182	LIN28A	0.784738
hsa_circ_0012300	459	371	SNRPA	0.0833333
hsa_circ_0012300	460	377	SRSF1	0.0957083
hsa_circ_0012300	461	277	RBM3	0.07703
hsa_circ_0012300	461	425	TRA2A	0.207892
hsa_circ_0012300	462	227	PABPN1	0.723618
hsa_circ_0012300	474	29	CG7804	0.250856
hsa_circ_0012300	474	409	TARDBP	0.641275
hsa_circ_0012300	476	260	pUf68	0.0518467
hsa_circ_0012300	486	409	TARDBP	0.303119
hsa_circ_0012300	488	260	pUf68	0.0614894
hsa_circ_0012300	489	425	TRA2A	0.225668
hsa_circ_0012300	491	424	tra2	0.269498
hsa_circ_0012300	492	228	PABPN1L	0.0682502
hsa_circ_0012300	492	425	TRA2A	0.203497
hsa_circ_0012300	494	131	HNRNPDL	0.113672
hsa_circ_0012300	495	5	A1CF	0.268734
hsa_circ_0012300	495	323	RBMS1	0.18247
hsa_circ_0012300	495	332	RBMS3	0.206149
hsa_circ_0012300	496	402	STARPAP	0.0692384
hsa_circ_0012300	502	395	SRSF9	1
hsa_circ_0012300	503	55	egw109003261	0.482419
hsa_circ_0012300	506	142	hnRNPK	0.0618761
hsa_circ_0012300	506	242	pcbp2	0.102507
hsa_circ_0012300	506	243	PCBP4	0.0709239
hsa_circ_0012300	507	138	HNRNPK	0.181186
hsa_circ_0012300	516	163	IGF2BP2	0.420126
hsa_circ_0012300	516	159	IGF2BP2	0.26857
hsa_circ_0012300	516	164	IGF2BP3	0.626723
hsa_circ_0012300	516	156	IGF2BP1	0.284681
hsa_circ_0012300	516	145	HNRNPL	0.0860709
hsa_circ_0012300	517	72	ENOX1	0.237407
hsa_circ_0012300	518	330	RBMS3	0.174972
hsa_circ_0012300	523	76	ENSGALG00000014267	0.651477
hsa_circ_0012300	524	425	TRA2A	0.225668
hsa_circ_0012300	530	3	A1CF	0.168995
hsa_circ_0012300	545	301	RBM24	0.737007
hsa_circ_0012300	546	446	ZCRB1	0.225851
hsa_circ_0012300	547	419	TIA1	0.213276
hsa_circ_0012300	548	296	RBM15B	0.150649
hsa_circ_0012300	549	1	A1CF	0.158066
hsa_circ_0012300	551	320	RBM46	0.487892
hsa_circ_0012300	554	277	RBM3	0.0633165
hsa_circ_0012300	554	216	NUPL2	0.991433
hsa_circ_0012300	557	1	A1CF	0.134479
hsa_circ_0012300	558	170	KHDRBS2	0.253089
hsa_circ_0012300	558	446	ZCRB1	0.213216
hsa_circ_0012300	559	175	KHDRBS3	0.193984
hsa_circ_0012300	559	173	KHDRBS2	0.18375
hsa_circ_0012300	562	228	PABPN1L	0.17068
hsa_circ_0012300	562	50	DAZAP1	0.0511805
hsa_circ_0012300	563	229	PABPN1L	1
hsa_circ_0012300	564	131	HNRNPDL	0.440478
hsa_circ_0012300	565	273	RALYL	0.0395325
hsa_circ_0012300	565	361	shep	0.063594
hsa_circ_0012300	566	360	shep	0.181596
hsa_circ_0012300	566	404	sup26CONSTRUCT	0.402122
hsa_circ_0012300	566	362	shep	0.201361
hsa_circ_0012300	573	397	SRSF9	0.147471
hsa_circ_0012300	576	383	SRSF4	0.953707
hsa_circ_0012300	577	359	SFPQ	0.0547188
hsa_circ_0012300	583	33	CNOT4	0.118218
hsa_circ_0012300	585	163	IGF2BP2	0.392897
hsa_circ_0012300	585	363	sm	1
hsa_circ_0012300	585	164	IGF2BP3	0.769051
hsa_circ_0012300	585	143	HNRNPL	0.34207
hsa_circ_0012300	585	37	Cnot4	0.496472
hsa_circ_0012300	585	145	HNRNPL	1
hsa_circ_0012300	585	33	CNOT4	1
hsa_circ_0012300	585	147	hnRNPLL	1
hsa_circ_0012300	586	8	ANIA04546	0.0857563
hsa_circ_0012300	587	146	HNRNPL	0.766979
hsa_circ_0012300	590	424	tra2	0.0777988
hsa_circ_0012300	591	397	SRSF9	0.0579864
hsa_circ_0012300	591	425	TRA2A	0.152237
hsa_circ_0012300	592	55	egw109003261	1
hsa_circ_0012300	594	164	IGF2BP3	0.102722
hsa_circ_0012300	594	443	YBX2	1
hsa_circ_0012300	599	210	NOVA1	0.136995
hsa_circ_0012300	601	440	UNK	0.340803
hsa_circ_0012300	606	228	PABPN1L	0.0682502
hsa_circ_0012300	606	425	TRA2A	0.203497
hsa_circ_0012300	608	131	HNRNPDL	0.113672
hsa_circ_0012300	609	99	FUBP3	0.165958
hsa_circ_0012300	609	332	RBMS3	0.199212
hsa_circ_0012300	609	327	RBMS3	1
hsa_circ_0012300	610	128	HNRNPD	0.325745
hsa_circ_0012300	610	131	HNRNPDL	0.147707
hsa_circ_0012300	610	324	RBMS2	0.720508
hsa_circ_0012300	611	361	shep	0.231282
hsa_circ_0012300	611	336	RC3H1	0.287423
hsa_circ_0012300	612	404	sup26CONSTRUCT	0.209743
hsa_circ_0012300	629	105	Fusip1	0.457491
hsa_circ_0012300	629	104	Fusip1	1
hsa_circ_0012300	629	341	Rnp4F	0.431229
hsa_circ_0012300	630	165	ILF2	0.0730666
hsa_circ_0012300	630	132	HNRNPF	0.0754416
hsa_circ_0012300	630	86	EWSR1	0.174018
hsa_circ_0012300	631	104	Fusip1	0.409711
hsa_circ_0012300	633	397	SRSF9	0.0559538
hsa_circ_0012300	633	342	RO3G00049	1
hsa_circ_0012300	633	118	HNRNPA2B1	0.145727
hsa_circ_0012300	633	82	ESRP1	0.177146
hsa_circ_0012300	633	134	HNRNPF	0.476678
hsa_circ_0012300	634	166	ILF2	0.141929
hsa_circ_0012300	638	320	RBM46	0.487892
hsa_circ_0012300	643	288	RBM5	0.10521
hsa_circ_0012300	643	214	NUPL2	0.169394
hsa_circ_0012300	644	393	SRSF9	0.722889
hsa_circ_0012300	645	397	SRSF9	0.0581084
hsa_circ_0012300	645	371	SNRPA	1
hsa_circ_0012300	645	382	SRSF2	0.388863
hsa_circ_0012300	652	186	LmjF352550	0.853369
hsa_circ_0012300	653	288	RBM5	0.0538009
hsa_circ_0012300	657	322	RBM47	0.0806405
hsa_circ_0012300	660	97	FUBP1	0.0479209
hsa_circ_0012300	661	260	pUf68	0.180358
hsa_circ_0012300	664	76	ENSGALG00000014267	0.701816
hsa_circ_0012300	664	78	ENSXETG00000012802	0.725376
hsa_circ_0012300	667	322	RBM47	0.0806405
hsa_circ_0012300	670	97	FUBP1	0.0479209
hsa_circ_0012300	671	260	pUf68	0.0518467
hsa_circ_0012300	673	171	KHDRBS2	0.113944
hsa_circ_0012300	674	173	KHDRBS2	0.247855
hsa_circ_0012300	675	429	TRNAU1AP	0.181132
hsa_circ_0012300	683	2	A1CF	0.907189
hsa_circ_0012300	683	321	RBM47	0.211107
hsa_circ_0012300	693	29	CG7804	0.145049
hsa_circ_0012300	694	86	EWSR1	0.103222
hsa_circ_0012300	700	209	NOVA1	0.186224
hsa_circ_0012300	709	440	UNK	0.340803
hsa_circ_0012300	712	79	ENSXETG00000018075	0.415129
hsa_circ_0012300	736	424	tra2	0.269498
hsa_circ_0012300	739	321	RBM47	0.192914
hsa_circ_0012300	740	365	SNRNP70	0.578918
hsa_circ_0012300	740	320	RBM46	0.502366
hsa_circ_0012300	749	91	Fmr1	0.128271
hsa_circ_0012300	760	228	PABPN1L	0.0682502
hsa_circ_0012300	760	414	Tbg97295210	0.278604
hsa_circ_0012300	764	51	DAZAP1	1
hsa_circ_0012300	765	200	MSI1	0.0640635
hsa_circ_0012300	765	202	MSI1	0.139795
hsa_circ_0012300	765	438	UNK	0.120918
hsa_circ_0012300	765	120	HNRNPAB	0.153801
hsa_circ_0012300	766	175	KHDRBS3	0.117647
hsa_circ_0012300	766	341	Rnp4F	0.213229
hsa_circ_0012300	767	277	RBM3	0.0513866
hsa_circ_0012300	767	173	KHDRBS2	1
hsa_circ_0012300	768	169	KHDRBS1	0.692717
hsa_circ_0012300	768	430	TVAG002940	0.320434
hsa_circ_0012300	769	228	PABPN1L	0.100313
hsa_circ_0012300	769	171	KHDRBS2	0.110355
hsa_circ_0012300	770	214	NUPL2	0.0557234
hsa_circ_0012300	770	228	PABPN1L	0.587729
hsa_circ_0012300	770	213	NUPL2	0.261834
hsa_circ_0012300	770	207	NAB2CONSTRUCT	0.442912
hsa_circ_0012300	770	414	Tbg97295210	0.675102
hsa_circ_0012300	770	170	KHDRBS2	0.0852277
hsa_circ_0012300	770	164	IGF2BP3	0.210527
hsa_circ_0012300	770	430	TVAG002940	0.374911
hsa_circ_0012300	770	222	PABPC1	0.629542
hsa_circ_0012300	770	187	LmjF354130	1
hsa_circ_0012300	770	346	SART3	0.632866
hsa_circ_0012300	770	225	PABPC4	1
hsa_circ_0012300	770	79	ENSXETG00000018075	0.117405
hsa_circ_0012300	771	77	ENSXETG00000007102	0.221492
hsa_circ_0012300	771	228	PABPN1L	0.0963892
hsa_circ_0012300	771	226	PABPC5	0.277716
hsa_circ_0012300	771	79	ENSXETG00000018075	0.184445
hsa_circ_0012300	772	77	ENSXETG00000007102	0.127001
hsa_circ_0012300	772	228	PABPN1L	0.164152
hsa_circ_0012300	772	213	NUPL2	0.885858
hsa_circ_0012300	772	79	ENSXETG00000018075	0.177243
hsa_circ_0012300	774	214	NUPL2	0.250736
hsa_circ_0012300	775	320	RBM46	0.634512
hsa_circ_0012300	775	253	PRR3	0.474981
hsa_circ_0012300	789	8	ANIA04546	0.136189
hsa_circ_0012300	794	8	ANIA04546	0.121769
hsa_circ_0012300	799	380	SRSF2	0.248547
hsa_circ_0012300	802	391	SRSF8	0.0577614
hsa_circ_0012300	804	192	MBNL1	0.0835241
hsa_circ_0012300	822	334	Rbp1like	0.276232
hsa_circ_0012300	827	339	RC3H1	0.155931
hsa_circ_0020093	0	347	SF1	0.419554
hsa_circ_0020093	3	36	CNOT4	0.468153
hsa_circ_0020093	17	273	RALYL	0.0394508
hsa_circ_0020093	18	128	HNRNPD	0.314278
hsa_circ_0020093	18	360	shep	0.6605
hsa_circ_0020093	18	404	sup26CONSTRUCT	1
hsa_circ_0020093	18	362	shep	1
hsa_circ_0020093	18	428	TRNAU1AP	0.190817
hsa_circ_0020093	18	127	HNRNPD	0.0981856
hsa_circ_0020093	18	51	DAZAP1	0.127099
hsa_circ_0020093	18	326	RBMS2	0.89718
hsa_circ_0020093	19	99	FUBP3	0.0689861
hsa_circ_0020093	19	448	ZFP36	0.381586
hsa_circ_0020093	19	361	shep	0.0894082
hsa_circ_0020093	19	130	HNRNPDL	0.154852
hsa_circ_0020093	19	174	KHDRBS3	1
hsa_circ_0020093	19	329	RBMS3	1
hsa_circ_0020093	21	347	SF1	0.669621
hsa_circ_0020093	34	1	A1CF	0.139117
hsa_circ_0020093	35	170	KHDRBS2	0.253089
hsa_circ_0020093	35	446	ZCRB1	0.213216
hsa_circ_0020093	37	347	SF1	0.175616
hsa_circ_0020093	42	171	KHDRBS2	0.335792
hsa_circ_0020093	42	252	PRR3	0.160372
hsa_circ_0020093	42	328	RBMS3	0.120411
hsa_circ_0020093	42	325	RBMS2	0.179825
hsa_circ_0020093	43	99	FUBP3	0.160708
hsa_circ_0020093	44	228	PABPN1L	0.0681296
hsa_circ_0020093	44	51	DAZAP1	0.446325
hsa_circ_0020093	45	99	FUBP3	0.0822444
hsa_circ_0020093	46	128	HNRNPD	0.118071
hsa_circ_0020093	46	175	KHDRBS3	0.0683114
hsa_circ_0020093	46	50	DAZAP1	0.106249
hsa_circ_0020093	46	131	HNRNPDL	0.271184
hsa_circ_0020093	47	99	FUBP3	0.046528
hsa_circ_0020093	47	361	shep	0.083364
hsa_circ_0020093	47	5	A1CF	1
hsa_circ_0020093	48	128	HNRNPD	0.336368
hsa_circ_0020093	48	360	shep	0.133123
hsa_circ_0020093	48	404	sup26CONSTRUCT	0.423342
hsa_circ_0020093	48	362	shep	0.35049
hsa_circ_0020093	48	175	KHDRBS3	0.179009
hsa_circ_0020093	48	171	KHDRBS2	0.256235
hsa_circ_0020093	48	331	RBMS3	0.182344
hsa_circ_0020093	48	252	PRR3	0.385362
hsa_circ_0020093	48	328	RBMS3	0.119264
hsa_circ_0020093	48	325	RBMS2	0.33447
hsa_circ_0020093	49	173	KHDRBS2	0.172437
hsa_circ_0020093	50	169	KHDRBS1	0.473958
hsa_circ_0020093	53	170	KHDRBS2	0.357143
hsa_circ_0020093	54	312	RBM42	0.151626
hsa_circ_0020093	54	175	KHDRBS3	0.11631
hsa_circ_0020093	54	172	KHDRBS2	0.315825
hsa_circ_0020093	55	248	PFF0320c	0.217827
hsa_circ_0020093	57	26	CELF1	1
hsa_circ_0020093	58	214	NUPL2	0.0440609
hsa_circ_0020093	61	266	pum	0.173645
hsa_circ_0020093	73	219	NUPL2	0.983929
hsa_circ_0020093	75	340	ref2	0.169301
hsa_circ_0020093	82	293	RBM6	0.196341
hsa_circ_0020093	91	359	SFPQ	0.0547188
hsa_circ_0020093	93	29	CG7804	0.0963187
hsa_circ_0020093	111	2	A1CF	0.56422
hsa_circ_0020093	111	209	NOVA1	0.0907626
hsa_circ_0020093	111	321	RBM47	0.21629
hsa_circ_0020093	112	320	RBM46	0.381055
hsa_circ_0020093	114	343	Rox8	0.135686
hsa_circ_0020093	114	184	LmjF180180	0.595858
hsa_circ_0020093	131	391	SRSF8	0.0689258
hsa_circ_0020093	143	362	shep	0.168229
hsa_circ_0020093	143	326	RBMS2	0.17976
hsa_circ_0020093	144	99	FUBP3	0.219762
hsa_circ_0020093	144	96	FUBP1	1
hsa_circ_0020093	145	178	KHSRP	0.233722
hsa_circ_0020093	146	266	pum	0.126572
hsa_circ_0020093	146	11	aretCONSTRUCT	0.219682
hsa_circ_0020093	146	24	CELF1	0.383596
hsa_circ_0020093	146	409	TARDBP	0.472682
hsa_circ_0020093	148	273	RALYL	0.110506
hsa_circ_0020093	148	65	ELAVL1	0.0706931
hsa_circ_0020093	148	427	TRNAU1AP	0.0566942
hsa_circ_0020093	148	95	FUBP1	0.123073
hsa_circ_0020093	148	96	FUBP1	0.285899
hsa_circ_0020093	148	16	BOLL	0.300685
hsa_circ_0020093	148	98	FUBP1	0.238142
hsa_circ_0020093	149	178	KHSRP	0.390497
hsa_circ_0020093	150	24	CELF1	0.0626805
hsa_circ_0020093	150	124	HNRNPCL1	0.0916093
hsa_circ_0020093	151	47	DAZ3	0.112191
hsa_circ_0020093	153	97	FUBP1	0.0479209
hsa_circ_0020093	154	260	pUf68	0.180358
hsa_circ_0020093	155	29	CG7804	0.105105
hsa_circ_0020093	156	396	SRSF9	0.192369
hsa_circ_0020093	157	288	RBM5	0.158806
hsa_circ_0020093	158	393	SRSF9	0.196326
hsa_circ_0020093	159	371	SNRPA	0.363636
hsa_circ_0020093	167	131	HNRNPDL	0.113784
hsa_circ_0020093	168	99	FUBP3	0.165958
hsa_circ_0020093	168	332	RBMS3	0.199212
hsa_circ_0020093	168	327	RBMS3	1
hsa_circ_0020093	169	128	HNRNPD	0.172246
hsa_circ_0020093	169	404	sup26CONSTRUCT	0.275568
hsa_circ_0020093	169	324	RBMS2	0.414566
hsa_circ_0020093	180	347	SF1	0.183884
hsa_circ_0020093	180	296	RBM15B	0.197229
hsa_circ_0020093	189	266	pum	0.173645
hsa_circ_0020093	191	112	HNRNPA0	0.0924831
hsa_circ_0020093	194	359	SFPQ	0.129564
hsa_circ_0020093	197	359	SFPQ	0.443146
hsa_circ_0020093	200	45	DAZ3	0.087635
hsa_circ_0020093	202	120	HNRNPAB	0.0925049
hsa_circ_0020093	207	289	RBM6	0.452042
hsa_circ_0020093	211	426	TRA2A	1
hsa_circ_0020093	215	77	ENSXETG00000007102	0.119898
hsa_circ_0020093	215	175	KHDRBS3	0.137598
hsa_circ_0020093	215	218	NUPL2	0.985113
hsa_circ_0020093	215	252	PRR3	0.455834
hsa_circ_0020093	218	260	pUf68	0.144891
hsa_circ_0020093	220	397	SRSF9	0.128526
hsa_circ_0020093	220	305	RBM25	0.334135
hsa_circ_0020093	220	118	HNRNPA2B1	0.219043
hsa_circ_0020093	221	166	ILF2	0.14119
hsa_circ_0020093	226	320	RBM46	0.487892
hsa_circ_0020093	238	426	TRA2A	0.947728
hsa_circ_0020093	249	23	CADANIAG00004740	0.164324
hsa_circ_0020093	251	310	RBM41	0.601509
hsa_circ_0020093	263	366	SNRPA	0.386437
hsa_circ_0020093	271	311	RBM41	0.988
hsa_circ_0020093	271	429	TRNAU1AP	0.188397
hsa_circ_0020093	271	247	PF130315	0.477144
hsa_circ_0020093	271	309	RBM41	0.410444
hsa_circ_0020093	272	202	MSI1	0.110095
hsa_circ_0020093	273	343	Rox8	0.286311
hsa_circ_0020093	273	184	LmjF180180	1
hsa_circ_0020093	273	297	RBM15B	0.0946435
hsa_circ_0020093	274	427	TRNAU1AP	0.181214
hsa_circ_0020093	274	40	CPEB2	0.559718
hsa_circ_0020093	274	274	RALYL	1
hsa_circ_0020093	274	122	HNRNPC	1
hsa_circ_0020093	275	258	PUF60	0.0770936
hsa_circ_0020093	275	273	RALYL	0.134513
hsa_circ_0020093	275	110	gw184451	0.176641
hsa_circ_0020093	275	405	Sxl	0.149526
hsa_circ_0020093	275	428	TRNAU1AP	0.148914
hsa_circ_0020093	275	364	Smp067420	1
hsa_circ_0020093	275	427	TRNAU1AP	0.125218
hsa_circ_0020093	275	433	TVAG514790	0.191861
hsa_circ_0020093	275	423	tiar3	0.393213
hsa_circ_0020093	275	422	tiar1	0.518138
hsa_circ_0020093	275	41	CPEB4	0.375258
hsa_circ_0020093	275	121	HNRNPC	0.294446
hsa_circ_0020093	275	297	RBM15B	0.341901
hsa_circ_0020093	275	254	PTBP1	0.195403
hsa_circ_0020093	275	95	FUBP1	0.068949
hsa_circ_0020093	275	123	HNRNPC	1
hsa_circ_0020093	275	255	PTBP1	0.148853
hsa_circ_0020093	275	126	HNRNPCL1	1
hsa_circ_0020093	275	124	HNRNPCL1	0.124605
hsa_circ_0020093	275	45	DAZ3	0.087279
hsa_circ_0020093	275	274	RALYL	0.191925
hsa_circ_0020093	275	18	BOLL	1
hsa_circ_0020093	276	63	elav	0.5894
hsa_circ_0020093	276	258	PUF60	1
hsa_circ_0020093	276	66	ELAVL1	0.159719
hsa_circ_0020093	276	273	RALYL	0.522494
hsa_circ_0020093	276	65	ELAVL1	0.134325
hsa_circ_0020093	276	110	gw184451	1
hsa_circ_0020093	276	64	ELAVL1	0.521614
hsa_circ_0020093	276	272	RALY	0.355004
hsa_circ_0020093	276	405	Sxl	1
hsa_circ_0020093	276	15	BOLL	0.786294
hsa_circ_0020093	276	364	Smp067420	0.530739
hsa_circ_0020093	276	427	TRNAU1AP	0.690405
hsa_circ_0020093	276	433	TVAG514790	1
hsa_circ_0020093	276	419	TIA1	0.0786764
hsa_circ_0020093	276	418	TIA1	0.773899
hsa_circ_0020093	276	420	TIA1	0.467697
hsa_circ_0020093	276	434	U2AF2	0.246082
hsa_circ_0020093	276	435	U2af50	0.579222
hsa_circ_0020093	276	421	TIA1	0.556236
hsa_circ_0020093	276	423	tiar3	0.467342
hsa_circ_0020093	276	422	tiar1	0.635338
hsa_circ_0020093	276	69	ELAVL4	0.38291
hsa_circ_0020093	276	41	CPEB4	0.471256
hsa_circ_0020093	276	121	HNRNPC	1
hsa_circ_0020093	276	445	ZC3H14CONSTRUCT	0.429829
hsa_circ_0020093	276	40	CPEB2	0.173537
hsa_circ_0020093	276	68	ELAVL1	1
hsa_circ_0020093	276	97	FUBP1	0.0835267
hsa_circ_0020093	276	295	RBM15B	0.38962
hsa_circ_0020093	276	297	RBM15B	0.0778934
hsa_circ_0020093	276	254	PTBP1	0.126738
hsa_circ_0020093	276	95	FUBP1	0.238074
hsa_circ_0020093	276	123	HNRNPC	0.299156
hsa_circ_0020093	276	296	RBM15B	0.130108
hsa_circ_0020093	276	126	HNRNPCL1	0.370412
hsa_circ_0020093	276	124	HNRNPCL1	1
hsa_circ_0020093	276	412	Tbg97262300	0.0724409
hsa_circ_0020093	276	54	egw103003671	1
hsa_circ_0020093	276	249	PFI1435w	0.57138
hsa_circ_0020093	276	274	RALYL	0.224977
hsa_circ_0020093	276	18	BOLL	0.286137
hsa_circ_0020093	276	179	KHSRP	0.167148
hsa_circ_0020093	277	273	RALYL	0.0655351
hsa_circ_0020093	277	361	shep	0.0498947
hsa_circ_0020093	277	405	Sxl	0.133167
hsa_circ_0020093	277	15	BOLL	0.25001
hsa_circ_0020093	277	428	TRNAU1AP	0.175981
hsa_circ_0020093	277	427	TRNAU1AP	0.117396
hsa_circ_0020093	277	418	TIA1	0.0651868
hsa_circ_0020093	277	435	U2af50	0.196736
hsa_circ_0020093	277	121	HNRNPC	0.0697703
hsa_circ_0020093	277	336	RC3H1	0.0602067
hsa_circ_0020093	277	124	HNRNPCL1	0.218212
hsa_circ_0020093	277	249	PFI1435w	0.16288
hsa_circ_0020093	277	18	BOLL	0.212621
hsa_circ_0020093	277	39	CPEB1	1
hsa_circ_0020093	278	124	HNRNPCL1	0.184177
hsa_circ_0020093	279	419	TIA1	0.109096
hsa_circ_0020093	288	192	MBNL1	0.0884136
hsa_circ_0020093	289	279	RBM4	0.604304
hsa_circ_0020093	294	328	RBMS3	0.188947
hsa_circ_0020093	297	50	DAZAP1	0.062252
hsa_circ_0020093	298	170	KHDRBS2	0.0722977
hsa_circ_0020093	305	359	SFPQ	0.0608866
hsa_circ_0020093	305	412	Tbg97262300	0.100912
hsa_circ_0020093	311	212	NOVA1	0.0851592
hsa_circ_0020093	314	343	Rox8	0.286311
hsa_circ_0020093	314	184	LmjF180180	1
hsa_circ_0020093	314	297	RBM15B	0.0946435
hsa_circ_0020093	316	254	PTBP1	0.449493
hsa_circ_0020093	316	255	PTBP1	0.445066
hsa_circ_0020093	316	124	HNRNPCL1	0.0681531
hsa_circ_0020093	318	273	RALYL	0.0771206
hsa_circ_0020093	318	124	HNRNPCL1	0.0742434
hsa_circ_0020093	318	259	PUF60	0.16826
hsa_circ_0020093	321	257	PTBP3	0.136786
hsa_circ_0020093	326	2	A1CF	0.605442
hsa_circ_0020093	326	321	RBM47	0.385009
hsa_circ_0020093	327	320	RBM46	1
hsa_circ_0020093	333	15	BOLL	0.124296
hsa_circ_0020093	333	25	CELF1	0.194628
hsa_circ_0020093	340	210	NOVA1	0.0336637
hsa_circ_0020093	340	347	SF1	0.166426
hsa_circ_0020093	359	342	RO3G00049	0.176272
hsa_circ_0020093	360	83	ESRP2	0.125102
hsa_circ_0020093	363	359	SFPQ	0.0547188
hsa_circ_0020093	374	359	SFPQ	0.137396
hsa_circ_0020093	395	201	MSI1	0.077493
hsa_circ_0020093	395	178	KHSRP	0.0977575
hsa_circ_0020093	395	50	DAZAP1	0.202762
hsa_circ_0020093	396	327	RBMS3	0.835321
hsa_circ_0020093	397	324	RBMS2	0.73301
hsa_circ_0020093	398	361	shep	0.231282
hsa_circ_0020093	398	336	RC3H1	0.287423
hsa_circ_0020093	400	436	unc75	0.163142
hsa_circ_0020093	401	29	CG7804	0.129447
hsa_circ_0020093	405	410	TARDBP	0.202881
hsa_circ_0020093	411	171	KHDRBS2	0.113944
hsa_circ_0020093	412	173	KHDRBS2	0.247855
hsa_circ_0020093	413	228	PABPN1L	0.0681296
hsa_circ_0020093	413	51	DAZAP1	0.446325
hsa_circ_0020093	415	402	STARPAP	0.131262
hsa_circ_0020093	419	197	mod	0.141285
hsa_circ_0020093	422	89	EWSR1	0.173931
hsa_circ_0020093	422	137	HNRNPH2	0.12007
hsa_circ_0020093	422	86	EWSR1	0.0906172
hsa_circ_0020093	425	29	CG7804	0.459976
hsa_circ_0020093	425	133	HNRNPF	0.0800065
hsa_circ_0020093	438	131	HNRNPDL	0.0816204
hsa_circ_0020093	451	262	pum	0.416816
hsa_circ_0020093	451	264	pum	0.809535
hsa_circ_0020093	451	265	pum	0.785784
hsa_circ_0020093	451	267	PUM1	0.237265
hsa_circ_0020093	461	30	CG7903	0.496802
hsa_circ_0020093	464	391	SRSF8	0.0542422
hsa_circ_0020093	473	210	NOVA1	0.0561519
hsa_circ_0020093	485	338	RC3H1	0.540049
hsa_circ_0020093	490	8	ANIA04546	0.121769
hsa_circ_0020093	498	182	LIN28A	0.514298
hsa_circ_0020093	500	216	NUPL2	0.235171
hsa_circ_0020093	501	103	Fusip1	0.123426
hsa_circ_0020093	501	414	Tbg97295210	1
hsa_circ_0020093	501	430	TVAG002940	1
hsa_circ_0020093	501	222	PABPC1	1
hsa_circ_0020093	501	226	PABPC5	0.159773
hsa_circ_0020093	501	346	SART3	1
hsa_circ_0020093	503	74	ENSGALG00000000814	0.160262
hsa_circ_0020093	503	228	PABPN1L	0.164003
hsa_circ_0020093	503	213	NUPL2	0.516751
hsa_circ_0020093	503	226	PABPC5	0.136518
hsa_circ_0020093	504	127	HNRNPD	0.0730123
hsa_circ_0020093	505	322	RBM47	1
hsa_circ_0020093	509	96	FUBP1	0.114417
hsa_circ_0020093	525	200	MSI1	0.0717316
hsa_circ_0020093	525	203	MSI1	0.666233
hsa_circ_0020093	525	204	MSI1	0.569503
hsa_circ_0092765	0	347	SF1	0.419554
hsa_circ_0092765	3	36	CNOT4	0.468153
hsa_circ_0092765	17	273	RALYL	0.0394508
hsa_circ_0092765	18	128	HNRNPD	0.314278
hsa_circ_0092765	18	360	shep	0.6605
hsa_circ_0092765	18	404	sup26CONSTRUCT	1
hsa_circ_0092765	18	362	shep	1
hsa_circ_0092765	18	428	TRNAU1AP	0.190817
hsa_circ_0092765	18	127	HNRNPD	0.0981856
hsa_circ_0092765	18	51	DAZAP1	0.127099
hsa_circ_0092765	18	326	RBMS2	0.89718
hsa_circ_0092765	19	99	FUBP3	0.0689861
hsa_circ_0092765	19	448	ZFP36	0.381586
hsa_circ_0092765	19	361	shep	0.0894082
hsa_circ_0092765	19	130	HNRNPDL	0.154852
hsa_circ_0092765	19	174	KHDRBS3	1
hsa_circ_0092765	19	329	RBMS3	1
hsa_circ_0092765	21	347	SF1	0.669621
hsa_circ_0092765	34	1	A1CF	0.139117
hsa_circ_0092765	35	170	KHDRBS2	0.253089
hsa_circ_0092765	35	446	ZCRB1	0.213216
hsa_circ_0092765	37	347	SF1	0.175616
hsa_circ_0092765	42	171	KHDRBS2	0.335792
hsa_circ_0092765	42	252	PRR3	0.160372
hsa_circ_0092765	42	328	RBMS3	0.120411
hsa_circ_0092765	42	325	RBMS2	0.179825
hsa_circ_0092765	43	99	FUBP3	0.160708
hsa_circ_0092765	44	228	PABPN1L	0.0681296
hsa_circ_0092765	44	51	DAZAP1	0.446325
hsa_circ_0092765	45	99	FUBP3	0.0822444
hsa_circ_0092765	46	128	HNRNPD	0.118071
hsa_circ_0092765	46	175	KHDRBS3	0.0683114
hsa_circ_0092765	46	50	DAZAP1	0.106249
hsa_circ_0092765	46	131	HNRNPDL	0.271184
hsa_circ_0092765	47	99	FUBP3	0.046528
hsa_circ_0092765	47	361	shep	0.083364
hsa_circ_0092765	47	5	A1CF	1
hsa_circ_0092765	48	128	HNRNPD	0.336368
hsa_circ_0092765	48	360	shep	0.133123
hsa_circ_0092765	48	404	sup26CONSTRUCT	0.423342
hsa_circ_0092765	48	362	shep	0.35049
hsa_circ_0092765	48	175	KHDRBS3	0.179009
hsa_circ_0092765	48	171	KHDRBS2	0.256235
hsa_circ_0092765	48	331	RBMS3	0.182344
hsa_circ_0092765	48	252	PRR3	0.385362
hsa_circ_0092765	48	328	RBMS3	0.119264
hsa_circ_0092765	48	325	RBMS2	0.33447
hsa_circ_0092765	49	173	KHDRBS2	0.172437
hsa_circ_0092765	50	169	KHDRBS1	0.473958
hsa_circ_0092765	53	170	KHDRBS2	0.357143
hsa_circ_0092765	54	312	RBM42	0.151626
hsa_circ_0092765	54	175	KHDRBS3	0.11631
hsa_circ_0092765	54	172	KHDRBS2	0.315825
hsa_circ_0092765	55	248	PFF0320c	0.217827
hsa_circ_0092765	57	26	CELF1	1
hsa_circ_0092765	58	214	NUPL2	0.0440609
hsa_circ_0092765	61	266	pum	0.173645
hsa_circ_0092765	73	219	NUPL2	0.983929
hsa_circ_0092765	75	340	ref2	0.169301
hsa_circ_0092765	82	293	RBM6	0.196341
hsa_circ_0092765	91	359	SFPQ	0.0547188
hsa_circ_0092765	93	29	CG7804	0.0963187
hsa_circ_0092765	111	2	A1CF	0.56422
hsa_circ_0092765	111	209	NOVA1	0.0907626
hsa_circ_0092765	111	321	RBM47	0.21629
hsa_circ_0092765	112	320	RBM46	0.381055
hsa_circ_0092765	114	343	Rox8	0.135686
hsa_circ_0092765	114	184	LmjF180180	0.595858
hsa_circ_0092765	131	391	SRSF8	0.0689258
hsa_circ_0092765	143	362	shep	0.168229
hsa_circ_0092765	143	326	RBMS2	0.17976
hsa_circ_0092765	144	99	FUBP3	0.219762
hsa_circ_0092765	144	96	FUBP1	1
hsa_circ_0092765	145	178	KHSRP	0.233722
hsa_circ_0092765	146	266	pum	0.126572
hsa_circ_0092765	146	11	aretCONSTRUCT	0.219682
hsa_circ_0092765	146	24	CELF1	0.383596
hsa_circ_0092765	146	409	TARDBP	0.472682
hsa_circ_0092765	148	273	RALYL	0.110506
hsa_circ_0092765	148	65	ELAVL1	0.0706931
hsa_circ_0092765	148	427	TRNAU1AP	0.0566942
hsa_circ_0092765	148	95	FUBP1	0.123073
hsa_circ_0092765	148	96	FUBP1	0.285899
hsa_circ_0092765	148	16	BOLL	0.300685
hsa_circ_0092765	148	98	FUBP1	0.238142
hsa_circ_0092765	149	178	KHSRP	0.390497
hsa_circ_0092765	150	24	CELF1	0.0626805
hsa_circ_0092765	150	124	HNRNPCL1	0.0916093
hsa_circ_0092765	151	47	DAZ3	0.112191
hsa_circ_0092765	153	97	FUBP1	0.0479209
hsa_circ_0092765	154	260	pUf68	0.180358
hsa_circ_0092765	155	29	CG7804	0.105105
hsa_circ_0092765	156	396	SRSF9	0.192369
hsa_circ_0092765	157	288	RBM5	0.158806
hsa_circ_0092765	158	393	SRSF9	0.196326
hsa_circ_0092765	159	371	SNRPA	0.363636
hsa_circ_0092765	167	131	HNRNPDL	0.113784
hsa_circ_0092765	168	99	FUBP3	0.165958
hsa_circ_0092765	168	332	RBMS3	0.199212
hsa_circ_0092765	168	327	RBMS3	1
hsa_circ_0092765	169	128	HNRNPD	0.172246
hsa_circ_0092765	169	404	sup26CONSTRUCT	0.275568
hsa_circ_0092765	169	324	RBMS2	0.414566
hsa_circ_0092765	180	347	SF1	0.183884
hsa_circ_0092765	180	296	RBM15B	0.197229
hsa_circ_0092765	189	266	pum	0.173645
hsa_circ_0092765	191	112	HNRNPA0	0.0924831
hsa_circ_0092765	194	359	SFPQ	0.129564
hsa_circ_0092765	197	359	SFPQ	0.443146
hsa_circ_0092765	200	45	DAZ3	0.087635
hsa_circ_0092765	202	120	HNRNPAB	0.0925049
hsa_circ_0092765	207	289	RBM6	0.452042
hsa_circ_0092765	211	426	TRA2A	1
hsa_circ_0092765	215	77	ENSXETG00000007102	0.119898
hsa_circ_0092765	215	175	KHDRBS3	0.137598
hsa_circ_0092765	215	218	NUPL2	0.985113
hsa_circ_0092765	215	252	PRR3	0.455834
hsa_circ_0092765	218	260	pUf68	0.144891
hsa_circ_0092765	220	397	SRSF9	0.128526
hsa_circ_0092765	220	305	RBM25	0.334135
hsa_circ_0092765	220	118	HNRNPA2B1	0.219043
hsa_circ_0092765	221	166	ILF2	0.14119
hsa_circ_0092765	226	320	RBM46	0.487892
hsa_circ_0092765	238	426	TRA2A	0.947728
hsa_circ_0092765	249	23	CADANIAG00004740	0.164324
hsa_circ_0092765	251	310	RBM41	0.601509
hsa_circ_0092765	263	366	SNRPA	0.386437
hsa_circ_0092765	271	311	RBM41	0.988
hsa_circ_0092765	271	429	TRNAU1AP	0.188397
hsa_circ_0092765	271	247	PF130315	0.477144
hsa_circ_0092765	271	309	RBM41	0.410444
hsa_circ_0092765	272	202	MSI1	0.110095
hsa_circ_0092765	273	343	Rox8	0.286311
hsa_circ_0092765	273	184	LmjF180180	1
hsa_circ_0092765	273	297	RBM15B	0.0946435
hsa_circ_0092765	274	427	TRNAU1AP	0.181214
hsa_circ_0092765	274	40	CPEB2	0.559718
hsa_circ_0092765	274	274	RALYL	1
hsa_circ_0092765	274	122	HNRNPC	1
hsa_circ_0092765	275	258	PUF60	0.0770936
hsa_circ_0092765	275	273	RALYL	0.134513
hsa_circ_0092765	275	110	gw184451	0.176641
hsa_circ_0092765	275	405	Sxl	0.149526
hsa_circ_0092765	275	428	TRNAU1AP	0.148914
hsa_circ_0092765	275	364	Smp067420	1
hsa_circ_0092765	275	427	TRNAU1AP	0.125218
hsa_circ_0092765	275	433	TVAG514790	0.191861
hsa_circ_0092765	275	423	tiar3	0.393213
hsa_circ_0092765	275	422	tiar1	0.518138
hsa_circ_0092765	275	41	CPEB4	0.375258
hsa_circ_0092765	275	121	HNRNPC	0.294446
hsa_circ_0092765	275	297	RBM15B	0.341901
hsa_circ_0092765	275	254	PTBP1	0.195403
hsa_circ_0092765	275	95	FUBP1	0.068949
hsa_circ_0092765	275	123	HNRNPC	1
hsa_circ_0092765	275	255	PTBP1	0.148853
hsa_circ_0092765	275	126	HNRNPCL1	1
hsa_circ_0092765	275	124	HNRNPCL1	0.124605
hsa_circ_0092765	275	45	DAZ3	0.087279
hsa_circ_0092765	275	274	RALYL	0.191925
hsa_circ_0092765	275	18	BOLL	1
hsa_circ_0092765	276	63	elav	0.5894
hsa_circ_0092765	276	258	PUF60	1
hsa_circ_0092765	276	66	ELAVL1	0.159719
hsa_circ_0092765	276	273	RALYL	0.522494
hsa_circ_0092765	276	65	ELAVL1	0.134325
hsa_circ_0092765	276	110	gw184451	1
hsa_circ_0092765	276	64	ELAVL1	0.521614
hsa_circ_0092765	276	272	RALY	0.355004
hsa_circ_0092765	276	405	Sxl	1
hsa_circ_0092765	276	15	BOLL	0.786294
hsa_circ_0092765	276	364	Smp067420	0.530739
hsa_circ_0092765	276	427	TRNAU1AP	0.690405
hsa_circ_0092765	276	433	TVAG514790	1
hsa_circ_0092765	276	419	TIA1	0.0786764
hsa_circ_0092765	276	418	TIA1	0.773899
hsa_circ_0092765	276	420	TIA1	0.467697
hsa_circ_0092765	276	434	U2AF2	0.246082
hsa_circ_0092765	276	435	U2af50	0.579222
hsa_circ_0092765	276	421	TIA1	0.556236
hsa_circ_0092765	276	423	tiar3	0.467342
hsa_circ_0092765	276	422	tiar1	0.635338
hsa_circ_0092765	276	69	ELAVL4	0.38291
hsa_circ_0092765	276	41	CPEB4	0.471256
hsa_circ_0092765	276	121	HNRNPC	1
hsa_circ_0092765	276	445	ZC3H14CONSTRUCT	0.429829
hsa_circ_0092765	276	40	CPEB2	0.173537
hsa_circ_0092765	276	68	ELAVL1	1
hsa_circ_0092765	276	97	FUBP1	0.0835267
hsa_circ_0092765	276	295	RBM15B	0.38962
hsa_circ_0092765	276	297	RBM15B	0.0778934
hsa_circ_0092765	276	254	PTBP1	0.126738
hsa_circ_0092765	276	95	FUBP1	0.238074
hsa_circ_0092765	276	123	HNRNPC	0.299156
hsa_circ_0092765	276	296	RBM15B	0.130108
hsa_circ_0092765	276	126	HNRNPCL1	0.370412
hsa_circ_0092765	276	124	HNRNPCL1	1
hsa_circ_0092765	276	412	Tbg97262300	0.0724409
hsa_circ_0092765	276	54	egw103003671	1
hsa_circ_0092765	276	249	PFI1435w	0.57138
hsa_circ_0092765	276	274	RALYL	0.224977
hsa_circ_0092765	276	18	BOLL	0.286137
hsa_circ_0092765	276	179	KHSRP	0.167148
hsa_circ_0092765	277	273	RALYL	0.0655351
hsa_circ_0092765	277	361	shep	0.0498947
hsa_circ_0092765	277	405	Sxl	0.133167
hsa_circ_0092765	277	15	BOLL	0.25001
hsa_circ_0092765	277	428	TRNAU1AP	0.175981
hsa_circ_0092765	277	427	TRNAU1AP	0.117396
hsa_circ_0092765	277	418	TIA1	0.0651868
hsa_circ_0092765	277	435	U2af50	0.196736
hsa_circ_0092765	277	121	HNRNPC	0.0697703
hsa_circ_0092765	277	336	RC3H1	0.0602067
hsa_circ_0092765	277	124	HNRNPCL1	0.218212
hsa_circ_0092765	277	249	PFI1435w	0.16288
hsa_circ_0092765	277	18	BOLL	0.212621
hsa_circ_0092765	277	39	CPEB1	1
hsa_circ_0092765	278	124	HNRNPCL1	0.184177
hsa_circ_0092765	279	419	TIA1	0.109096
hsa_circ_0092765	288	192	MBNL1	0.0884136
hsa_circ_0092765	289	279	RBM4	0.604304
hsa_circ_0092765	294	328	RBMS3	0.188947
hsa_circ_0092765	297	50	DAZAP1	0.062252
hsa_circ_0092765	298	170	KHDRBS2	0.0722977
hsa_circ_0092765	305	359	SFPQ	0.0608866
hsa_circ_0092765	305	412	Tbg97262300	0.100912
hsa_circ_0092765	311	212	NOVA1	0.0851592
hsa_circ_0092765	314	343	Rox8	0.286311
hsa_circ_0092765	314	184	LmjF180180	1
hsa_circ_0092765	314	297	RBM15B	0.0946435
hsa_circ_0092765	316	254	PTBP1	0.449493
hsa_circ_0092765	316	255	PTBP1	0.445066
hsa_circ_0092765	316	124	HNRNPCL1	0.0681531
hsa_circ_0092765	318	273	RALYL	0.0771206
hsa_circ_0092765	318	124	HNRNPCL1	0.0742434
hsa_circ_0092765	318	259	PUF60	0.16826
hsa_circ_0092765	321	257	PTBP3	0.136786
hsa_circ_0092765	326	2	A1CF	0.605442
hsa_circ_0092765	326	321	RBM47	0.385009
hsa_circ_0092765	327	320	RBM46	1
hsa_circ_0092765	333	15	BOLL	0.124296
hsa_circ_0092765	333	25	CELF1	0.194628
hsa_circ_0092765	340	210	NOVA1	0.0336637
hsa_circ_0092765	340	347	SF1	0.166426
hsa_circ_0092765	359	342	RO3G00049	0.176272
hsa_circ_0092765	360	83	ESRP2	0.125102
hsa_circ_0092765	363	359	SFPQ	0.0547188
hsa_circ_0092765	374	359	SFPQ	0.137396
hsa_circ_0092765	395	201	MSI1	0.077493
hsa_circ_0092765	395	178	KHSRP	0.0977575
hsa_circ_0092765	395	50	DAZAP1	0.202762
hsa_circ_0092765	396	327	RBMS3	0.835321
hsa_circ_0092765	397	324	RBMS2	0.73301
hsa_circ_0092765	398	361	shep	0.231282
hsa_circ_0092765	398	336	RC3H1	0.287423
hsa_circ_0092765	400	436	unc75	0.163142
hsa_circ_0092765	401	29	CG7804	0.129447
hsa_circ_0092765	405	410	TARDBP	0.202881
hsa_circ_0092765	411	171	KHDRBS2	0.113944
hsa_circ_0092765	412	173	KHDRBS2	0.247855
hsa_circ_0092765	413	228	PABPN1L	0.0681296
hsa_circ_0092765	413	51	DAZAP1	0.446325
hsa_circ_0092765	415	402	STARPAP	0.131262
hsa_circ_0092765	419	197	mod	0.141285
hsa_circ_0092765	422	89	EWSR1	0.173931
hsa_circ_0092765	422	137	HNRNPH2	0.12007
hsa_circ_0092765	422	86	EWSR1	0.0906172
hsa_circ_0092765	425	29	CG7804	0.459976
hsa_circ_0092765	425	133	HNRNPF	0.0800065
hsa_circ_0092765	438	131	HNRNPDL	0.0816204
hsa_circ_0092765	451	262	pum	0.416816
hsa_circ_0092765	451	264	pum	0.809535
hsa_circ_0092765	451	265	pum	0.785784
hsa_circ_0092765	451	267	PUM1	0.237265
hsa_circ_0092765	461	30	CG7903	0.496802
hsa_circ_0092765	464	391	SRSF8	0.0542422
hsa_circ_0092765	473	210	NOVA1	0.0561519
hsa_circ_0092765	485	338	RC3H1	0.540049
hsa_circ_0092765	490	8	ANIA04546	0.121769
hsa_circ_0092765	498	182	LIN28A	0.514298
hsa_circ_0092765	500	216	NUPL2	0.235171
hsa_circ_0092765	501	103	Fusip1	0.123426
hsa_circ_0092765	501	414	Tbg97295210	1
hsa_circ_0092765	501	430	TVAG002940	1
hsa_circ_0092765	501	222	PABPC1	1
hsa_circ_0092765	501	226	PABPC5	0.159773
hsa_circ_0092765	501	346	SART3	1
hsa_circ_0092765	503	74	ENSGALG00000000814	0.160262
hsa_circ_0092765	503	228	PABPN1L	0.164003
hsa_circ_0092765	503	213	NUPL2	0.516751
hsa_circ_0092765	503	226	PABPC5	0.136518
hsa_circ_0092765	504	127	HNRNPD	0.0730123
hsa_circ_0092765	505	322	RBM47	1
hsa_circ_0092765	509	96	FUBP1	0.114417
hsa_circ_0092765	525	200	MSI1	0.0717316
hsa_circ_0092765	525	203	MSI1	0.666233
hsa_circ_0092765	525	204	MSI1	0.569503
hsa_circ_0092765	543	15	BOLL	0.173193
hsa_circ_0092765	543	124	HNRNPCL1	0.0544037
hsa_circ_0092765	544	453	ZNF638	0.4629
hsa_circ_0092765	545	273	RALYL	0.256914
hsa_circ_0092765	545	295	RBM15B	0.0711053
hsa_circ_0092765	546	15	BOLL	0.193253
hsa_circ_0092765	551	410	TARDBP	0.202881
hsa_circ_0092765	556	48	DAZ3	0.0736693
hsa_circ_0092765	561	257	PTBP3	0.054666
hsa_circ_0092765	571	256	PTBP3	0.0630413
hsa_circ_0092765	586	142	hnRNPK	0.0744877
hsa_circ_0092765	591	177	KHDRBS3	0.191744
hsa_circ_0092765	596	206	mubCONSTRUCT	0.404398
hsa_circ_0092765	612	416	Tbg9721117950CONS	0.220769
hsa_circ_0092765	612	205	msiCONSTRUCT	0.214306
hsa_circ_0092765	613	372	Srp54	0.349248
hsa_circ_0092765	616	86	EWSR1	0.0591002
hsa_circ_0092765	623	415	Tbg972111000	0.377533
hsa_circ_0092765	626	8	ANIA04546	0.167525
hsa_circ_0092765	626	162	IGF2BP2	0.063878
hsa_circ_0092765	627	175	KHDRBS3	0.190057
hsa_circ_0092765	627	164	IGF2BP3	0.19986
hsa_circ_0092765	627	143	HNRNPL	0.214422
hsa_circ_0092765	627	145	HNRNPL	0.120114
hsa_circ_0092765	628	211	NOVA1	0.285741
hsa_circ_0092765	631	214	NUPL2	0.0508809
hsa_circ_0092765	632	400	SRSF11	0.22148
hsa_circ_0092765	633	383	SRSF4	1
hsa_circ_0092765	634	44	DAZ3	0.317169
hsa_circ_0092765	636	428	TRNAU1AP	0.0800112
hsa_circ_0092765	637	45	DAZ3	0.126331
hsa_circ_0092765	640	185	LmjF320750	1
hsa_circ_0092765	644	285	RBM4B	0.161685
hsa_circ_0092765	645	394	SRSF9	0.168355
hsa_circ_0092765	648	31	CG17838	1
hsa_circ_0092765	649	130	HNRNPDL	0.111145
hsa_circ_0092765	650	322	RBM47	0.126312
hsa_circ_0092765	650	174	KHDRBS3	0.237153
hsa_circ_0092765	652	273	RALYL	0.0590053
hsa_circ_0092765	652	24	CELF1	0.139047
hsa_circ_0092765	652	295	RBM15B	0.0673088
hsa_circ_0092765	652	85	etr1	0.389248
hsa_circ_0092765	654	260	pUf68	0.186499
hsa_circ_0092765	655	86	EWSR1	0.0513609
hsa_circ_0092765	656	22	BRUNOL6	0.194766
hsa_circ_0092765	656	20	BRUNOL4	0.120369
hsa_circ_0092765	656	453	ZNF638	0.105504
hsa_circ_0092765	657	372	Srp54	0.227525
hsa_circ_0092765	657	135	HNRNPH2	0.126568
hsa_circ_0092765	657	88	EWSR1	0.148477
hsa_circ_0092765	658	29	CG7804	0.145049
hsa_circ_0092765	661	359	SFPQ	0.0586758
hsa_circ_0092765	665	359	SFPQ	0.104807
hsa_circ_0092765	666	396	SRSF9	0.149679
hsa_circ_0092765	666	86	EWSR1	0.0386642
hsa_circ_0092765	671	323	RBMS1	0.328159
hsa_circ_0092765	672	402	STARPAP	0.0692384
hsa_circ_0092765	674	311	RBM41	0.684722
hsa_circ_0092765	674	273	RALYL	0.0333513
hsa_circ_0092765	674	309	RBM41	0.364368
hsa_circ_0092765	676	428	TRNAU1AP	0.127962
hsa_circ_0092765	676	297	RBM15B	0.133395
hsa_circ_0092765	677	446	ZCRB1	0.225851
hsa_circ_0092765	679	296	RBM15B	0.0810349
hsa_circ_0092765	686	44	DAZ3	0.505685
hsa_circ_0092765	689	273	RALYL	0.256914
hsa_circ_0092765	689	295	RBM15B	0.0711053
hsa_circ_0092765	690	273	RALYL	0.0676889
hsa_circ_0092765	690	15	BOLL	0.609289
hsa_circ_0092765	690	124	HNRNPCL1	0.0997265
hsa_circ_0092765	691	301	RBM24	0.289803
hsa_circ_0092765	691	427	TRNAU1AP	0.0599201
hsa_circ_0092765	706	429	TRNAU1AP	0.134398
hsa_circ_0092765	707	361	shep	0.127329
hsa_circ_0092765	707	336	RC3H1	0.0571237
hsa_circ_0092765	707	127	HNRNPD	0.19139
hsa_circ_0092765	707	130	HNRNPDL	0.0982959
hsa_circ_0092765	707	1	A1CF	0.205787
hsa_circ_0092765	707	52	DAZAP1	0.266727
hsa_circ_0092765	708	322	RBM47	0.312934
hsa_circ_0092765	708	314	RBM45	0.174769
hsa_circ_0092765	709	156	IGF2BP1	0.092304
hsa_circ_0092765	715	112	HNRNPA0	0.088537
hsa_circ_0092765	719	438	UNK	0.0908097
hsa_circ_0092765	719	203	MSI1	0.152296
hsa_circ_0092765	719	204	MSI1	0.129615
hsa_circ_0092765	719	120	HNRNPAB	0.11544
hsa_circ_0092765	722	214	NUPL2	0.0508809
hsa_circ_0092765	723	400	SRSF11	0.22148
hsa_circ_0092765	724	398	SRSF10	0.176071
hsa_circ_0092765	724	379	SRSF2	0.236704
hsa_circ_0092765	724	383	SRSF4	0.970144
hsa_circ_0092765	726	201	MSI1	0.058302
hsa_circ_0092765	726	50	DAZAP1	0.0877072
hsa_circ_0092765	727	327	RBMS3	0.835321
hsa_circ_0092765	728	324	RBMS2	0.421759
hsa_circ_0092765	729	260	pUf68	0.0637951
hsa_circ_0092765	731	197	mod	0.125806
hsa_circ_0092765	734	359	SFPQ	0.0491053
hsa_circ_0092765	739	372	Srp54	0.50372
hsa_circ_0092765	739	57	EIF4B	0.5
hsa_circ_0092765	752	288	RBM5	0.139914
hsa_circ_0092765	760	241	PCBP2	0.100729
hsa_circ_0092765	773	91	Fmr1	0.778858
hsa_circ_0092765	783	191	MBNL1	0.0652363
hsa_circ_0092765	785	273	RALYL	0.129551
hsa_circ_0092765	788	419	TIA1	0.0625096
hsa_circ_0092765	789	99	FUBP3	0.210204
hsa_circ_0092765	789	273	RALYL	0.0592894
hsa_circ_0092765	789	295	RBM15B	0.06767
hsa_circ_0092765	789	95	FUBP1	0.0589897
hsa_circ_0092765	789	296	RBM15B	0.0704846
hsa_circ_0092765	789	124	HNRNPCL1	0.0744571
hsa_circ_0092765	789	327	RBMS3	0.447077
hsa_circ_0092765	790	324	RBMS2	0.497212
hsa_circ_0092765	791	361	shep	0.0549616
hsa_circ_0092765	791	210	NOVA1	0.159567
hsa_circ_0092765	791	336	RC3H1	0.112274
hsa_circ_0092765	797	397	SRSF9	0.171182
hsa_circ_0092765	797	394	SRSF9	0.185867
hsa_circ_0092765	799	163	IGF2BP2	0.233892
hsa_circ_0092765	799	228	PABPN1L	0.0636645
hsa_circ_0092765	799	224	PABPC3	0.599622
hsa_circ_0092765	802	443	YBX2	0.706213
hsa_circ_0092765	802	442	YB1	0.302635
hsa_circ_0092765	802	441	YB1	0.369472
hsa_circ_0092765	804	273	RALYL	0.0513157
hsa_circ_0092765	806	427	TRNAU1AP	0.0489043
hsa_circ_0092765	806	256	PTBP3	0.115665
hsa_circ_0092765	806	124	HNRNPCL1	0.0919457
hsa_circ_0092765	808	273	RALYL	0.0590053
hsa_circ_0092765	808	24	CELF1	0.139047
hsa_circ_0092765	808	295	RBM15B	0.0673088
hsa_circ_0092765	808	85	etr1	0.389248
hsa_circ_0092765	810	99	FUBP3	0.219762
hsa_circ_0092765	810	96	FUBP1	1
hsa_circ_0092765	811	178	KHSRP	0.233722
hsa_circ_0092765	812	29	CG7804	0.151587
hsa_circ_0092765	815	393	SRSF9	0.271586
hsa_circ_0092765	815	133	HNRNPF	0.133466
hsa_circ_0092765	815	167	ILF2	0.197729
hsa_circ_0092765	816	183	LIN28A	0.112917
hsa_circ_0092765	829	277	RBM3	0.0633165
hsa_circ_0092765	829	216	NUPL2	0.991433
hsa_circ_0092765	830	175	KHDRBS3	0.0561923
hsa_circ_0092765	830	170	KHDRBS2	0.108298
hsa_circ_0092765	830	164	IGF2BP3	0.161906
hsa_circ_0092765	830	187	LmjF354130	0.961325
hsa_circ_0092765	830	145	HNRNPL	0.108649
hsa_circ_0092765	834	322	RBM47	0.0815916
hsa_circ_0092765	836	29	CG7804	0.105105
hsa_circ_0092765	848	33	CNOT4	0.0984581
hsa_circ_0092765	853	76	ENSGALG00000014267	0.701816
hsa_circ_0092765	853	78	ENSXETG00000012802	0.725376
hsa_circ_0092765	856	322	RBM47	0.0806405
hsa_circ_0092765	858	29	CG7804	0.119243
hsa_circ_0092765	860	260	pUf68	0.0726247
hsa_circ_0092765	864	427	TRNAU1AP	0.0443179
hsa_circ_0092765	865	301	RBM24	0.267981
hsa_circ_0092765	865	428	TRNAU1AP	0.161695
hsa_circ_0092765	865	45	DAZ3	0.398725
hsa_circ_0092765	865	18	BOLL	0.228553
hsa_circ_0092765	865	39	CPEB1	0.273903
hsa_circ_0092765	866	446	ZCRB1	0.229113
hsa_circ_0092765	866	124	HNRNPCL1	0.184317
hsa_circ_0092765	866	174	KHDRBS3	0.19373
hsa_circ_0092765	868	347	SF1	0.669621
hsa_circ_0092765	870	50	DAZAP1	0.116396
hsa_circ_0092765	872	163	IGF2BP2	0.547195
hsa_circ_0092765	872	159	IGF2BP2	0.131453
hsa_circ_0092765	872	164	IGF2BP3	0.771343
hsa_circ_0092765	872	143	HNRNPL	1
hsa_circ_0092765	872	145	HNRNPL	0.308469
hsa_circ_0092765	872	147	hnRNPLL	0.387704
hsa_circ_0092765	872	160	IGF2BP2	0.376945
hsa_circ_0092765	873	209	NOVA1	0.214176
hsa_circ_0092765	874	188	MAL8P140	0.39734
hsa_circ_0092765	874	330	RBMS3	1
hsa_circ_0092765	874	51	DAZAP1	0.314616
hsa_circ_0092765	874	310	RBM41	0.518519
hsa_circ_0092765	887	288	RBM5	0.0711145
hsa_circ_0092765	889	182	LIN28A	0.16714
hsa_circ_0092765	895	164	IGF2BP3	0.259107
hsa_circ_0092765	895	222	PABPC1	0.237498
hsa_circ_0092765	895	346	SART3	0.238271
hsa_circ_0092765	896	77	ENSXETG00000007102	0.138053
hsa_circ_0092765	896	79	ENSXETG00000018075	0.10921
hsa_circ_0092765	897	228	PABPN1L	0.0610116
hsa_circ_0092765	908	412	Tbg97262300	0.194586
hsa_circ_0092765	909	453	ZNF638	0.4629
hsa_circ_0092765	910	49	DAZ3	0.205864
hsa_circ_0092765	914	91	Fmr1	0.128271
hsa_circ_0092765	924	391	SRSF8	0.174345
hsa_circ_0092765	926	398	SRSF10	0.176071
hsa_circ_0092765	926	379	SRSF2	0.236704
hsa_circ_0092765	926	383	SRSF4	0.970144
hsa_circ_0092765	929	409	TARDBP	0.399303
hsa_circ_0092765	937	359	SFPQ	0.0608266
hsa_circ_0092765	938	165	ILF2	0.135787
hsa_circ_0092765	938	183	LIN28A	0.273359
hsa_circ_0092765	938	132	HNRNPF	0.115079
hsa_circ_0092765	938	86	EWSR1	0.274476
hsa_circ_0092765	939	375	SRSF1	0.649426
hsa_circ_0092765	939	374	SRSF1	0.284649
hsa_circ_0092765	939	14	B52	0.727608
hsa_circ_0092765	939	376	SRSF1	0.662356
hsa_circ_0092765	939	373	SRSF1	0.224469
hsa_circ_0092765	939	372	Srp54	0.225083
hsa_circ_0092765	941	394	SRSF9	0.088316
hsa_circ_0092765	941	91	Fmr1	0.285651
hsa_circ_0092765	945	163	IGF2BP2	0.254325
hsa_circ_0092765	945	164	IGF2BP3	0.400271
hsa_circ_0092765	946	209	NOVA1	0.0745268
hsa_circ_0092765	955	361	shep	0.132318
hsa_circ_0092765	955	210	NOVA1	0.0838836
hsa_circ_0092765	955	336	RC3H1	0.282941
hsa_circ_0092765	956	100	FUBP3	0.244311
hsa_circ_0092765	956	360	shep	0.246589
hsa_circ_0092765	956	362	shep	0.133013
hsa_circ_0092765	956	97	FUBP1	0.1549
hsa_circ_0092765	956	129	HNRNPD	0.312181
hsa_circ_0092765	957	260	pUf68	0.0598213
hsa_circ_0092765	957	70	ELAVL4	0.067041
hsa_circ_0092765	958	29	CG7804	0.119243
hsa_circ_0092765	967	149	Hrb27C	0.0565562
hsa_circ_0092765	968	120	HNRNPAB	0.363939
hsa_circ_0092765	971	129	HNRNPD	0.319357
hsa_circ_0092765	972	201	MSI1	0.342974
hsa_circ_0092765	973	199	msi	0.175476
hsa_circ_0092765	980	412	Tbg97262300	0.0886237
hsa_circ_0092765	988	397	SRSF9	0.0602193
hsa_circ_0092765	994	271	qkr58E1	0.129598
hsa_circ_0092765	995	131	HNRNPDL	1
hsa_circ_0092765	996	273	RALYL	0.0395325
hsa_circ_0092765	996	361	shep	0.063594
hsa_circ_0092765	997	360	shep	0.181596
hsa_circ_0092765	997	404	sup26CONSTRUCT	0.402122
hsa_circ_0092765	997	362	shep	0.201361
hsa_circ_0092765	998	260	pUf68	0.0618579
hsa_circ_0092765	1001	149	Hrb27C	0.0565562
hsa_circ_0092765	1013	131	HNRNPDL	0.113784
hsa_circ_0092765	1014	99	FUBP3	0.165958
hsa_circ_0092765	1014	332	RBMS3	0.199212
hsa_circ_0092765	1014	327	RBMS3	1
hsa_circ_0092765	1015	128	HNRNPD	0.172246
hsa_circ_0092765	1015	404	sup26CONSTRUCT	0.275568
hsa_circ_0092765	1015	324	RBMS2	0.414566
hsa_circ_0092765	1016	260	pUf68	0.0637951
hsa_circ_0092765	1023	325	RBMS2	0.356157
hsa_circ_0092765	1028	288	RBM5	0.0558884
hsa_circ_0092765	1029	400	SRSF11	1
hsa_circ_0092765	1030	398	SRSF10	1
hsa_circ_0092765	1030	379	SRSF2	1
hsa_circ_0092765	1030	389	SRSF5	1
hsa_circ_0092765	1031	391	SRSF8	0.159982
hsa_circ_0092765	1034	163	IGF2BP2	0.166694
hsa_circ_0092765	1034	159	IGF2BP2	0.093156
hsa_circ_0092765	1034	143	HNRNPL	0.0877944
hsa_circ_0092765	1035	72	ENOX1	0.302672
hsa_circ_0092765	1048	210	NOVA1	0.0977159
hsa_circ_0092765	1053	210	NOVA1	0.0273569
hsa_circ_0092765	1057	163	IGF2BP2	0.153867
hsa_circ_0092765	1068	191	MBNL1	0.0613636
hsa_circ_0092765	1072	380	SRSF2	1
hsa_circ_0092765	1077	226	PABPC5	0.240691
hsa_circ_0092765	1078	277	RBM3	0.122188
hsa_circ_0092765	1079	170	KHDRBS2	0.357143
hsa_circ_0092765	1080	312	RBM42	0.151626
hsa_circ_0092765	1080	175	KHDRBS3	0.11631
hsa_circ_0092765	1080	172	KHDRBS2	0.315825
hsa_circ_0092765	1084	288	RBM5	0.10521
hsa_circ_0092765	1084	214	NUPL2	0.169394
hsa_circ_0092765	1085	393	SRSF9	0.348348
hsa_circ_0092765	1086	397	SRSF9	0.133475
hsa_circ_0092765	1091	257	PTBP3	0.116045
hsa_circ_0092765	1100	167	ILF2	0.184259
hsa_circ_0092765	1101	86	EWSR1	0.0388156
hsa_circ_0092765	1113	402	STARPAP	0.199914
hsa_circ_0092765	1118	359	SFPQ	0.137396
hsa_circ_0092765	1120	303	RBM24	0.466134
hsa_circ_0092765	1120	29	CG7804	0.100567
hsa_circ_0092765	1120	13	AT1G76460TAIRG	0.279753
hsa_circ_0092765	1120	409	TARDBP	0.357231
hsa_circ_0092765	1120	10	aret	0.139502
hsa_circ_0092765	1120	21	BRUNOL5	0.112235
hsa_circ_0092765	1120	20	BRUNOL4	0.130082
hsa_circ_0092765	1121	73	ENSDARG00000058818	0.171152
hsa_circ_0092765	1121	302	RBM24	0.197173
hsa_circ_0092765	1122	98	FUBP1	0.412696
hsa_circ_0092765	1124	409	TARDBP	0.303119
[truncated: 31,652 more rows]

## Sheet: Table S5_circRNAs_sex
position	baseMean	log2FoldChange	lfcSE	stat	pvalue	padj	circBankID	circbaseID	strand	splicedSeqLength	annotation	bestTranscript	geneSymbol
Y:21749095-21749393	869029214885081	912258520002999	0.399692619535053	228240021310424	2.64914e-101	9.9793e-97	hsa_circTXLNG2P_002	hsa_circ_0009024	+	298	ANNOTATED, INTERNAL, ncRNA, OVEXON	NR_045128	TXLNG2P
Y:2821949-2829687	254426881459858	808285684804697	0.360870375608097	22398227713834	4.09549e-97	7.71385e-94	hsa_circZFY_001	hsa_circ_0001953	+	662	ANNOTATED, CDS, coding, INTERNAL, OVCODE, OVEXON, UTR5	NM_003411	ZFY
Y:2829114-2829687	707535790641137	624365654676259	0.387435625551066	161153392589594	1.99068e-44	2.49964e-41	hsa_circZFY_003	hsa_circ_0007907	+	573	ANNOTATED, CDS, coding, INTERNAL, OVCODE, OVEXON	NM_003411	ZFY
Y:15021270-15024974	591017312867822	573098832541665	0.365810107951577	156665663436924	2.56043e-41	2.41129e-37	hsa_circDDX3Y_002	hsa_circ_0008297	+	434	ANNOTATED, CDS, coding, INTERNAL, OVCODE, OVEXON	NM_001122665	DDX3Y
Y:15024874-15026561	179128150031704	428583695559217	0.449742615406401	952953268997948	1.57993e-07	0.00119032	hsa_circDDX3Y_004	hsa_circ_0005757	+	322	ANNOTATED, CDS, coding, INTERNAL, OVCODE, OVEXON	NM_001122665	DDX3Y
Y:7209155-7239930	195593106924689	439303263891868	0.464684544093656	945379547212415	3.26762e-07	0.00205152	hsa_circPRKY_004	hsa_circ_0006322	+	441	ANNOTATED, INTERNAL, ncRNA, OVEXON	NR_028062	PRKY
Y:14821320-14834120	175311973836331	425904977250546	0.462155132681018	921562798144898	3.09462e-06	0.0166534	hsa_circUSP9Y_007	hsa_circ_0006301	+	385	ANNOTATED, CDS, coding, INTERNAL, OVCODE, OVEXON, UTR5	NM_004654	USP9Y
Y:14832521-14851563	15629019186121	393026781081896	0.440953079916264	891312021579555	4.96161e-05	0.023363	hsa_circUSP9Y_017	hsa_circ_0092237	+	1326	ANNOTATED, CDS, coding, INTERNAL, OVCODE, OVEXON	NM_004654	USP9Y
Y:15478146-15481229	188582798747095	408928851267361	0.522882233915703	782066830240186	0.0525436	2199.24	hsa_circUTY_005	hsa_circ_0003368	-	221	ANNOTATED, CDS, coding, INTERNAL, OVCODE, OVEXON	NM_007125	UTY
Y:7209155-7224271	147572958780397	346348178081021	0.544029920530684	636634429487204	19358.7	7.29241e+07	hsa_circPRKY_003	hsa_circ_0092231	+	216	ANNOTATED, INTERNAL, ncRNA, OVEXON	NR_028062	PRKY
Y:15447442-15448215	0.716903934052877	300827148709666	0.590914570536669	509087376939198	3.56417e+06	0.00122056708138167	hsa_circUTY_009	hsa_circ_0140758	-	773	ANNOTATED, CDS, coding, INTERNAL, OVCODE, OVERLAPTX, OVEXON	ENST00000331397.4	UTY
Y:14821320-14870572	0.575277353094934	267152606833207	0.636409003923704	419781312310337	2.69505e+09	0.0846020731623729	hsa_circUSP9Y_011	hsa_circ_0140735	+	1826	ANNOTATED, CDS, coding, INTERNAL, OVCODE, OVEXON, UTR5	NM_004654	USP9Y
1:10032075-10041228	236659973131046	-0.729281422011897	0.386652995443705	-188613933062902	0.0592761814834947	0.999992923375272	hsa_circNMNAT1_001	hsa_circ_0110116	+	495	ANNOTATED, CDS, coding, INTERNAL, OVCODE, OVEXON, UTR5	ENST00000377205.1	NMNAT1
1:100335955-100343384	0.195038515231555	0.328740199542372	122668239721861	0.267991291215852	0.788706022234903	0.999992923375272	hsa_circAGL_008	hsa_circ_0013290	+	947	ANNOTATED, CDS, coding, INTERNAL, OVCODE, OVEXON	NM_000028	AGL
1:10035649-10041228	0.192480845374442	0.311008668907121	100998882157936	0.307932783276536	0.758133479606499	0.999992923375272	NA	NA	NA	NA	NA	NA	NA
1:100459092-100464971	152651564233626	-0.647029614385984	0.384480049352024	-168286915140706	0.0924004246069381	0.999992923375272	hsa_circSLC35A3_001	hsa_circ_0013298	+	360	ANNOTATED, CDS, coding, INTERNAL, OVCODE, OVEXON, UTR5	NM_012243	SLC35A3
1:100459092-100480976	0.239290118547151	0.206668055298988	0.993552837960199	0.208009123826052	0.83522184338504	0.999992923375272	hsa_circSLC35A3_004	hsa_circ_0110135	+	771	ANNOTATED, CDS, coding, INTERNAL, OVCODE, OVERLAPTX, OVEXON, UTR5	ENST00000370155.3	SLC35A3
1:100459092-100483371	0.277166884347524	-0.366024676992592	104779934137335	-0.349327072980257	0.726843775824118	0.999992923375272	hsa_circSLC35A3_005	hsa_circ_0110136	+	905	ANNOTATED, CDS, coding, INTERNAL, OVCODE, OVERLAPTX, OVEXON, UTR5	ENST00000370155.3	SLC35A3
1:100472589-100483371	0.290485969036293	-0.268207947679321	0.92185658513927	-0.290943246490778	0.77109472534261	0.999992923375272	hsa_circSLC35A3_010	hsa_circ_0013299	+	545	ANNOTATED, CDS, coding, INTERNAL, OVCODE, OVEXON	NM_012243	SLC35A3
1:100476920-100480976	0.0385308627405793	-0.307423843036446	286785964884873	-0.1071962650473	0.914633278418294	0.999992923375272	NA	NA	NA	NA	NA	NA	NA
1:100515464-100527505	0.745967098186699	0.0283710047858932	0.553396024973567	0.0512670917490749	0.959112690586234	0.999992923375272	hsa_circHIAT1_006	hsa_circ_0110148	+	402	ANNOTATED, CDS, coding, INTERNAL, OVCODE, OVERLAPTX, OVEXON	ENST00000370152.3	HIAT1
1:100515464-100534142	0.0775075067234829	-0.507838831848861	199042571909782	-0.255140810820634	0.798614344466508	0.999992923375272	NA	NA	NA	NA	NA	NA	NA
1:100515464-100535241	0.58332949057886	-0.765710326204273	0.658953763057034	-116200918658082	0.245231733377314	0.999992923375272	hsa_circHIAT1_007	hsa_circ_0000096	+	807	ANNOTATED, CDS, coding, INTERNAL, OVCODE, OVEXON	NM_033055	HIAT1
1:100515464-100544104	0.0626235552279612	0.090777794890415	234792920847138	0.0386629181846228	0.969159138292127	0.999992923375272	NA	NA	NA	NA	NA	NA	NA
1:100524221-100527505	0.161967852149931	0.0283290794737425	108042742339798	0.0262202521522885	0.979081662553281	0.999992923375272	hsa_circHIAT1_008	hsa_circ_0110149	+	306	ANNOTATED, CDS, coding, INTERNAL, OVCODE, OVERLAPTX, OVEXON	ENST00000370152.3	HIAT1
1:100542720-100544104	0.298677794508148	-0.151244118204716	0.698607865049339	-0.216493580692846	0.828603028388038	0.999992923375272	hsa_circHIAT1_014	hsa_circ_0110151	+	211	ANNOTATED, CDS, coding, INTERNAL, OVCODE, OVERLAPTX, OVEXON	ENST00000370152.3	HIAT1
1:100568510-100573109	0.0234525700870299	-0.146808874360891	295032400758612	-0.0497602548002875	0.96031343949803	0.999992923375272	hsa_circSASS6_004	hsa_circ_0013306	-	528	ANNOTATED, CDS, coding, INTERNAL, OVCODE, OVEXON	NM_194292	SASS6
1:100568510-100576039	0.169554152807912	-116423040402921	118528893089392	-0.982233423163049	0.325984865131798	0.999992923375272	hsa_circSASS6_003	hsa_circ_0013307	-	1005	ANNOTATED, CDS, coding, INTERNAL, OVCODE, OVEXON	NM_194292	SASS6
1:100588765-100591498	18714302082292	-0.10891135274296	0.459119902703673	-0.237217668198658	0.812487930214455	0.999992923375272	hsa_circSASS6_001	hsa_circ_0110153	-	141	ANNOTATED, INTERNAL, ncRNA, OVCODE, OVERLAPTX, OVEXON	ENST00000462159.1	SASS6
1:100602437-100606070	0.363875413888002	-0.259171672319184	0.684609418444619	-0.37856866314811	0.705008196240701	0.999992923375272	hsa_circCCDC76_003	hsa_circ_0110155	+	354	ANNOTATED, CDS, coding, INTERNAL, OVCODE, OVERLAPTX, OVEXON	NM_019083	CCDC76
1:100602437-100609699	0.922737350399283	0.166122190420487	0.465976016008426	0.356503735628924	0.721463355005644	0.999992923375272	hsa_circCCDC76_004	hsa_circ_0110156	+	670	ANNOTATED, CDS, coding, INTERNAL, OVCODE, OVERLAPTX, OVEXON	NM_019083	CCDC76
1:100605204-100609699	0.445851069452833	0.00651807137017816	0.801834262166758	0.00812895092879256	0.993514106989603	0.999992923375272	hsa_circCCDC76_005	hsa_circ_0110157	+	556	ANNOTATED, CDS, coding, INTERNAL, OVCODE, OVERLAPTX, OVEXON	NM_019083	CCDC76
1:100617940-100638926	0.151972040357196	0.566523344321631	149638413445165	0.37859486162571	0.704988738443499	0.999992923375272	hsa_circLRRC39_003	hsa_circ_0110160	-	1070	ANNOTATED, CDS, coding, INTERNAL, OVCODE, OVEXON, UTR5	ENST00000370138.1	LRRC39
1:100680372-100681755	0.11906992692322	-0.0751274671312644	131099866105851	-0.0573055254462318	0.95430181891871	0.999992923375272	hsa_circDBT_007	hsa_circ_0110169	-	384	ANNOTATED, CDS, coding, INTERNAL, OVCODE, OVEXON	NM_001918	DBT
1:100681538-100684303	0.165838189429455	-0.226734235534533	170459333181959	-0.133013682091847	0.894182559907147	0.999992923375272	hsa_circDBT_003	hsa_circ_0013312	-	339	ANNOTATED, CDS, coding, INTERNAL, OVCODE, OVEXON	NM_001918	DBT
1:100696288-100706440	0.199767820372069	-0.181579581412547	10232928269444	-0.177446354192427	0.859157799594743	0.999992923375272	hsa_circDBT_001	hsa_circ_0110171	-	382	ANNOTATED, CDS, coding, INTERNAL, OVCODE, OVEXON	NM_001918	DBT
1:100700991-100706440	0.0424490611184763	-0.307434518096111	279364493277543	-0.110047814054408	0.912371455030591	0.999992923375272	NA	NA	NA	NA	NA	NA	NA
1:100750783-100752759	0.161150035454465	0.355284946329059	117103814484724	0.303393145554115	0.761590268722452	0.999992923375272	hsa_circRTCD1_010	hsa_circ_0013321	+	200	ANNOTATED, CDS, coding, INTERNAL, OVCODE, OVEXON	NM_001130841	RTCD1
1:100843101-100856380	0.405418500054014	0.775979806934643	0.695796597134081	111523943941495	0.264747829406409	0.999992923375272	hsa_circCDC14A_001	hsa_circ_0013323	+	169	ANNOTATED, CDS, coding, INTERNAL, OVCODE, OVERLAPTX, OVEXON	NM_003672	CDC14A
1:100856287-100908552	0.119973744355217	-0.705605738317477	132686219512219	-0.531785245605326	0.594874742788713	0.999992923375272	NA	NA	NA	NA	NA	NA	NA
1:100889777-100908552	390603937467412	-0.548854352324319	0.320502663246425	-171247984888763	0.0868082750766972	0.999992923375272	hsa_circCDC14A_003	hsa_circ_0000097	+	210	ANNOTATED, CDS, coding, INTERNAL	NM_033312	CDC14A
1:100889777-100928437	0.0971646850527177	-0.313306135439206	171502026216518	-0.182683634911499	0.855046257115068	0.999992923375272	NA	NA	NA	NA	NA	NA	NA
1:100889777-100933650	0.0954355440509884	-0.496694625053752	206140632440538	-0.240949403896403	0.809594331111599	0.999992923375272	hsa_circCDC14A_005	hsa_circ_0110174	+	668	ANNOTATED, CDS, coding, INTERNAL, OVCODE, OVERLAPTX, OVEXON	NM_003672	CDC14A
1:100889777-100964818	0.0757422384968989	-0.389060459825178	241012117711018	-0.161427758703683	0.871756505090517	0.999992923375272	NA	NA	NA	NA	NA	NA	NA
1:100905487-100921048	0.248478852069513	0.918207358393641	0.976856820957143	0.939961045154973	0.347237542642143	0.999992923375272	hsa_circCDC14A_008	hsa_circ_0013326	+	218	ANNOTATED, CDS, coding, INTERNAL, OVCODE, OVEXON	NM_003672	CDC14A
1:100905487-100928437	0.312653693718445	-0.167030589649677	0.952696481411328	-0.175324033318814	0.860825028381262	0.999992923375272	NA	NA	NA	NA	NA	NA	NA
1:100905487-100933650	0.359650056516787	0.891164235984222	0.84252202179996	105773405670791	0.290176704030659	0.999992923375272	NA	NA	NA	NA	NA	NA	NA
1:100920960-100928437	0.0250702642270289	-0.318429037036768	287393617857457	-0.110798924280463	0.911775798400355	0.999992923375272	NA	NA	NA	NA	NA	NA	NA
1:100949847-100964818	0.149261858643837	0.0775986895503468	141427798593321	0.0548680601141813	0.956243577868533	0.999992923375272	NA	NA	NA	NA	NA	NA	NA
1:100960373-100964818	109244057982002	-0.405354277329625	0.484047316899898	-0.837426968763579	0.402352611865929	0.999992923375272	hsa_circCDC14A_014	hsa_circ_0013330	+	618	ANNOTATED, CDS, coding, INTERNAL, OVCODE, OVEXON	NM_003672	CDC14A
1:101372407-101379362	0.138711388746446	-0.142765157495376	133656072754938	-0.106815316769885	0.914935495971483	0.999992923375272	hsa_circSLC30A7_008	hsa_circ_0013339	+	473	ANNOTATED, CDS, coding, INTERNAL, OVCODE, OVEXON	NM_133496	SLC30A7
1:101372407-101383683	0.322686434649846	-0.168440560451417	110734067890987	-0.15211268190494	0.879098061892038	0.999992923375272	hsa_circSLC30A7_009	hsa_circ_0013340	+	524	ANNOTATED, CDS, coding, INTERNAL, OVCODE, OVEXON	NM_133496	SLC30A7
1:101372407-101387397	594955917773173	-0.114838019850071	0.314551120131096	-0.365085394711707	0.715047662904227	0.999992923375272	hsa_circSLC30A7_010	hsa_circ_0000098	+	660	ANNOTATED, CDS, coding, INTERNAL, OVCODE, OVEXON	NM_001144884	SLC30A7
1:101376618-101387397	0.264535777695139	-0.210264723881563	0.843402316979991	-0.249305366665896	0.803124580363317	0.999992923375272	hsa_circSLC30A7_019	hsa_circ_0013348	+	546	ANNOTATED, CDS, coding, INTERNAL, OVCODE, OVEXON	NM_133496	SLC30A7
1:101377667-101387397	0.246697006991107	-0.386908706229218	0.846364059336875	-0.45714217417545	0.647568858494586	0.999992923375272	hsa_circSLC30A7_022	hsa_circ_0013351	+	458	ANNOTATED, CDS, coding, INTERNAL, OVCODE, OVEXON	NM_133496	SLC30A7
1:101377667-101431474	0.185709254062975	-0.180787033224504	0.996184093153253	-0.181479542252329	0.855991189447321	0.999992923375272	hsa_circSLC30A7_023	hsa_circ_0110180	+	699	ANNOTATED, CDS, coding, INTERNAL, OVCODE, OVEXON	NM_133496	SLC30A7
1:101379218-101387397	169543052909329	0.119335773399328	0.361268637623976	0.330324199144953	0.741155009913824	0.999992923375272	hsa_circSLC30A7_025	hsa_circ_0013353	+	331	ANNOTATED, CDS, coding, INTERNAL, OVCODE, OVEXON	NM_133496	SLC30A7
1:101379218-101440458	0.686968294460936	-0.420333268305551	0.63250249505823	-0.664555905454339	0.506334580282663	0.999992923375272	hsa_circSLC30A7_026	hsa_circ_0110181	+	665	ANNOTATED, CDS, coding, INTERNAL, OVCODE, OVEXON, UTR3	NM_001144884	SLC30A7
1:101460665-101479374	0.375591415082269	-0.635507735077476	0.886898577511545	-0.716550630693963	0.473651416160359	0.999992923375272	hsa_circDPH5_005	hsa_circ_0110183	-	270	ANNOTATED, INTERNAL, ncRNA, OVCODE, OVERLAPTX, OVEXON	ENST00000370105.3	DPH5
1:101460665-101487321	0.190174973917972	-0.231538788316195	126944578327063	-0.182393601497225	0.855273846851933	0.999992923375272	hsa_circDPH5_003	hsa_circ_0110184	-	395	ANNOTATED, INTERNAL, ncRNA, OVCODE, OVERLAPTX, OVEXON	ENST00000370105.3	DPH5
1:101460665-101491022	0.223641196697063	-0.527340825707405	0.939424201485074	-0.561344731031803	0.574562553536818	0.999992923375272	NA	NA	NA	NA	NA	NA	NA
1:101467022-101479374	0.139967852941553	0.525886586734992	124609267455295	0.422028471456715	0.673004235958527	0.999992923375272	hsa_circDPH5_004	hsa_circ_0110185	-	230	ANNOTATED, INTERNAL, ncRNA, OVCODE, OVERLAPTX, OVEXON	ENST00000370105.3	DPH5
1:101467022-101491022	0.0436606001273398	0.0326928201137654	279321663696296	0.0117043625192323	0.990661483069529	0.999992923375272	NA	NA	NA	NA	NA	NA	NA
1:101477146-101479374	0.0892799751478853	-0.130669812335031	194471478165395	-0.0671922759922144	0.946428634094836	0.999992923375272	NA	NA	NA	NA	NA	NA	NA
1:10155518-10165802	285389466489653	-0.240234974436396	0.361467101353787	-0.664610896916082	0.506299397704172	0.999992923375272	hsa_circUBE4B_004	hsa_circ_0005199	+	598	ANNOTATED, CDS, coding, INTERNAL, OVCODE, OVEXON	NM_001105562	UBE4B
1:10155518-10179671	0.0476883805582	-0.143954115775923	242764443276559	-0.0592978583819744	0.952714866878782	0.999992923375272	hsa_circUBE4B_005	hsa_circ_0110187	+	1228	ANNOTATED, CDS, coding, INTERNAL, OVCODE, OVERLAPTX, OVEXON	NM_001105562	UBE4B
1:10155518-10182134	0.0656086121805555	-0.366457766387776	250626052106816	-0.146216948839617	0.883750126115832	0.999992923375272	NA	NA	NA	NA	NA	NA	NA
1:10161165-10163150	0.0302810424273975	-0.443459318520624	295042716894732	-0.150303428326565	0.880525228304504	0.999992923375272	NA	NA	NA	NA	NA	NA	NA
1:10177516-10179671	0.0833158864041048	-0.413978503066431	193573554810465	-0.213861084212548	0.830655388402941	0.999992923375272	hsa_circUBE4B_012	hsa_circ_0009689	+	243	ANNOTATED, CDS, coding, INTERNAL, OVCODE, OVEXON	NM_001105562	UBE4B
1:10177516-10195244	0.108433032318174	-0.789967381710154	187303158723374	-0.42175870769849	0.673201148199236	0.999992923375272	hsa_circUBE4B_014	hsa_circ_0007962	+	1028	ANNOTATED, CDS, coding, INTERNAL, OVCODE, OVEXON	NM_001105562	UBE4B
1:10179570-10182134	0.0936492089643043	-0.307485031433589	255036171735045	-0.120565263092575	0.904035384118259	0.999992923375272	hsa_circUBE4B_017	hsa_circ_0009691	+	216	ANNOTATED, CDS, coding, INTERNAL, OVCODE, OVERLAPTX, OVEXON	NM_001105562	UBE4B
1:10190557-10190871	0.329833672419177	-0.0026471864058864	0.714854998404028	-0.0037031095981653	0.997045352777521	0.999992923375272	hsa_circUBE4B_023	hsa_circ_0009696	+	216	ANNOTATED, CDS, coding, INTERNAL, OVCODE, OVERLAPTX, OVEXON	NM_001105562	UBE4B
1:10190557-10195244	0.104984692241045	-0.0288571104494322	144684260398114	-0.0199448857602263	0.98408733859732	0.999992923375272	hsa_circUBE4B_024	hsa_circ_0110194	+	529	ANNOTATED, CDS, coding, INTERNAL, OVCODE, OVERLAPTX, OVEXON	NM_001105562	UBE4B
1:10195045-10195244	0.0300640922144928	-0.515602789714053	295039171490934	-0.174757401570963	0.861270261775472	0.999992923375272	NA	NA	NA	NA	NA	NA	NA
1:10195045-10197263	0.645898924756987	0.00904278938124906	0.563798020052189	0.0160390584209785	0.987203231582859	0.999992923375272	hsa_circUBE4B_029	hsa_circ_0006955	+	338	ANNOTATED, CDS, coding, INTERNAL, OVCODE, OVEXON	NM_001105562	UBE4B
1:10204997-10211619	0.136087677332373	0.378342509672835	117806470881806	0.321155966086465	0.748092199934921	0.999992923375272	hsa_circUBE4B_033	hsa_circ_0110199	+	563	ANNOTATED, CDS, coding, INTERNAL, OVCODE, OVEXON	NM_001105562	UBE4B
1:10204997-10218540	0.128569725012841	0.0678316565193096	193348807761945	0.0350825315679346	0.972013930626956	0.999992923375272	hsa_circUBE4B_034	hsa_circ_0110200	+	690	ANNOTATED, CDS, coding, INTERNAL, OVCODE, OVEXON	NM_001105562	UBE4B
1:10207020-10221344	0.093082325155152	-0.293014440710906	207276918140228	-0.141363757884838	0.887582583725006	0.999992923375272	hsa_circUBE4B_036	hsa_circ_0110202	+	735	ANNOTATED, CDS, coding, INTERNAL, OVCODE, OVEXON	NM_001105562	UBE4B
1:10209241-10211619	104425282080102	-0.34003162120686	0.522961995134397	-0.650203311847689	0.515560902075548	0.999992923375272	hsa_circUBE4B_037	hsa_circ_0009700	+	335	ANNOTATED, CDS, coding, INTERNAL, OVCODE, OVEXON	NM_001105562	UBE4B
1:10209241-10221344	0.739112157799184	0.421924056259625	0.539922514319724	0.781452977176232	0.434536122936366	0.999992923375272	hsa_circUBE4B_038	hsa_circ_0009701	+	607	ANNOTATED, CDS, coding, INTERNAL, OVCODE, OVEXON	NM_001105562	UBE4B
1:10211383-10221344	0.216757809709161	0.381445803288511	111230921083121	0.342931443499835	0.731650036035657	0.999992923375272	hsa_circUBE4B_039	hsa_circ_0110203	+	508	ANNOTATED, CDS, coding, INTERNAL, OVCODE, OVEXON	NM_001105562	UBE4B
1:10316304-10322028	0.0771325346489335	-0.152452980708324	217318007837472	-0.0701520238591275	0.944072659608278	0.999992923375272	hsa_circKIF1B_008	hsa_circ_0110214	+	323	ANNOTATED, CDS, coding, INTERNAL, OVCODE, OVEXON	ENST00000377086.1	KIF1B
1:10318550-10322028	0.0623105549739611	-0.608379280984151	282794117948807	-0.215131518787206	0.829664780738583	0.999992923375272	hsa_circKIF1B_011	hsa_circ_0110217	+	246	ANNOTATED, CDS, coding, INTERNAL, OVCODE, OVEXON	ENST00000377086.1	KIF1B
1:10321962-10328321	0.0844053798307626	-0.479841228812048	17696232213489	-0.271154459900389	0.786272236972333	0.999992923375272	hsa_circKIF1B_019	hsa_circ_0110224	+	357	ANNOTATED, CDS, coding, INTERNAL, OVCODE, OVEXON	ENST00000377086.1	KIF1B
1:10321962-10332364	0.107198332857898	-0.0123629869643693	158736336188529	-0.00778837867952674	0.993785835721985	0.999992923375272	hsa_circKIF1B_020	hsa_circ_0110225	+	501	ANNOTATED, CDS, coding, INTERNAL, OVCODE, OVEXON	ENST00000377086.1	KIF1B
1:10327437-10328321	0.349443994294315	-0.705795206060021	0.950434173660965	-0.742602934132069	0.45772211159225	0.999992923375272	hsa_circKIF1B_026	hsa_circ_0002002	+	291	ANNOTATED, CDS, coding, INTERNAL, OVCODE, OVEXON	NM_015074	KIF1B
1:10331559-10335561	0.10408078456042	-0.576633291952764	169560404408253	-0.340075440351272	0.733799716465088	0.999992923375272	hsa_circKIF1B_033	hsa_circ_0110235	+	238	ANNOTATED, CDS, coding, INTERNAL, OVCODE, OVEXON	ENST00000377086.1	KIF1B
1:10331559-10336457	0.0435723880628599	-0.797459109543802	295027471694681	-0.270299950361598	0.786929503542639	0.999992923375272	hsa_circKIF1B_034	hsa_circ_0110236	+	317	ANNOTATED, CDS, coding, INTERNAL, OVCODE, OVEXON	ENST00000377086.1	KIF1B
1:10351139-10357304	0.187170035078067	-114056304041064	142382955178445	-0.801053074773733	0.423100920481158	0.999992923375272	hsa_circKIF1B_050	hsa_circ_0110252	+	681	ANNOTATED, CDS, coding, INTERNAL, OVCODE, OVEXON	ENST00000377086.1	KIF1B
1:10380100-10384953	0.242432162356502	-0.324935213514235	149655683070133	-0.21712186724106	0.82811337283719	0.999992923375272	hsa_circKIF1B_055	hsa_circ_0110258	+	560	ANNOTATED, CDS, coding, INTERNAL, OVCODE, OVEXON	ENST00000377086.1	KIF1B
1:10402107-10406011	0.0667289702513894	-0.305326581174388	184976006365703	-0.165062803102554	0.868894550182	0.999992923375272	hsa_circKIF1B_064	hsa_circ_0110266	+	284	ANNOTATED, CDS, coding, INTERNAL, OVCODE, OVEXON	ENST00000377086.1	KIF1B
1:104070316-104078816	0.245567456002309	0.231397199828137	0.889406704721269	0.260170289474774	0.794732420868236	0.999992923375272	NA	NA	NA	NA	NA	NA	NA
1:104070316-104088964	0.0451580065127065	-0.218251177656442	27523848814813	-0.0792952973709773	0.936797746679761	0.999992923375272	NA	NA	NA	NA	NA	NA	NA
1:10407818-10408791	0.467125152384508	-1682192825571	0.888258784693519	-189380938816317	0.0582503150783285	0.999992923375272	hsa_circKIF1B_068	hsa_circ_0009711	+	152	ANNOTATED, CDS, coding, INTERNAL, OVCODE, OVEXON	NM_015074	KIF1B
1:10407818-10412794	0.0590719549077297	-0.268428731979779	287393248126069	-0.0934011963503154	0.925584840124138	0.999992923375272	hsa_circKIF1B_069	hsa_circ_0110270	+	258	ANNOTATED, CDS, coding, INTERNAL, OVCODE, OVEXON	ENST00000377086.1	KIF1B
1:104083971-104089657	0.181565320623292	0.310154818826459	119523740961259	0.259492228349	0.795255477597858	0.999992923375272	NA	NA	NA	NA	NA	NA	NA
1:104108056-104118162	785447779858974	0.179965907029445	0.292531205034308	0.615202426039773	0.538421045826937	0.999992923375272	hsa_circAMY2B_001	hsa_circ_0000099	+	1307	ANNOTATED, CDS, coding, INTERNAL, UTR5	NM_020978	AMY2B
1:10423340-10425706	0.380641203646593	-0.327367813798426	0.775631535859441	-0.422066146956861	0.672976736764355	0.999992923375272	hsa_circKIF1B_082	hsa_circ_0009716	+	448	ANNOTATED, CDS, coding, INTERNAL, OVCODE, OVEXON	NM_015074	KIF1B
1:10425157-10425706	0.147062294808775	-0.316662498902049	120798728971553	-0.262140588396935	0.793213055565951	0.999992923375272	hsa_circKIF1B_086	hsa_circ_0009718	+	386	ANNOTATED, CDS, coding, INTERNAL, OVCODE, OVEXON	NM_015074	KIF1B
1:10463127-10464336	171985767314304	-0.476785482831232	0.432212447869325	-110312760583745	0.269971754055036	0.999992923375272	hsa_circPGD_005	hsa_circ_0110291	+	185	ANNOTATED, CDS, coding, INTERNAL, OVCODE, OVEXON	ENST00000538557.1	PGD
1:10463127-10468197	0.569636699980075	-0.331800248628799	0.590684464530979	-0.561721644215341	0.574305685170225	0.999992923375272	NA	NA	NA	NA	NA	NA	NA
1:10463127-10473308	0.202388282903143	-0.371251257719762	150562164687893	-0.246576726954839	0.805235817688235	0.999992923375272	hsa_circPGD_006	hsa_circ_0009726	+	580	ANNOTATED, CDS, coding, INTERNAL, OVCODE, OVEXON	NM_002631	PGD
1:10464217-10468197	0.36510715188043	-0.0995456948540677	0.757057564887956	-0.131490258430745	0.895387492313595	0.999992923375272	hsa_circPGD_008	hsa_circ_0009728	+	189	ANNOTATED, CDS, coding, INTERNAL, OVCODE, OVEXON	NM_002631	PGD
1:10471474-10473308	0.452634102600252	0.227567790451028	0.787801875932945	0.28886424036695	0.77268526974108	0.999992923375272	hsa_circPGD_012	hsa_circ_0009732	+	325	ANNOTATED, CDS, coding, INTERNAL, OVCODE, OVEXON	NM_002631	PGD
1:10500403-10502498	358879804343898	-0.305100176608403	0.284551013539266	-107221609515125	0.283622982786932	0.999992923375272	hsa_circAPITD1_002	hsa_circ_0006905	+	244	ALT_DONOR, INTERNAL, ncRNA, OVCODE, OVEXON	NR_036462	APITD1
1:10527246-10529395	168504355592512	-0.199257915789477	0.414024637774693	-0.481270672345616	0.63032413805754	0.999992923375272	hsa_circDFFA_001	hsa_circ_0008936	-	305	ANNOTATED, CDS, coding, INTERNAL, OVCODE, OVEXON	NM_213566	DFFA
1:10596269-10659423	0.0512199620285616	-0.250042817303948	238948055752849	-0.104643168790866	0.916658958984967	0.999992923375272	hsa_circPEX14_003	hsa_circ_0009742	+	214	ANNOTATED, CDS, coding, INTERNAL, OVCODE, OVERLAPTX, OVEXON	NM_004565	PEX14
1:108138833-108145785	0.650401208591513	-0.305895820399952	0.62839498384432	-0.486789086902919	0.626407804830674	0.999992923375272	NA	NA	NA	NA	NA	NA	NA
1:108138833-108152587	0.724537678509689	-0.32682725221428	0.744890536610261	-0.438758765417477	0.660836341302412	0.999992923375272	NA	NA	NA	NA	NA	NA	NA
1:108138833-108160254	108582978849549	0.150324817872139	0.551068635586534	0.272787831069608	0.785016314332782	0.999992923375272	NA	NA	NA	NA	NA	NA	NA
1:108138833-108185377	112726767687069	-0.508268125735854	0.503051864027052	-101036923244264	0.312318422953733	0.999992923375272	hsa_circVAV3_005	hsa_circ_0110301	-	573	ANNOTATED, CDS, coding, INTERNAL, OVCODE, OVEXON	ENST00000370056.4	VAV3
1:108138833-108247683	0.318289904530685	-0.671900941928115	10026772852762	-0.670106874659111	0.502789662783904	0.999992923375272	NA	NA	NA	NA	NA	NA	NA
1:108185240-108231028	0.25925335923953	0.0220059673375978	145812178543112	0.0150919954406218	0.987958786949113	0.999992923375272	NA	NA	NA	NA	NA	NA	NA
1:108185240-108247683	171641157209689	-0.0102583405810285	0.441370604247156	-0.0232420113218145	0.981457227459433	0.999992923375272	NA	NA	NA	NA	NA	NA	NA
1:108226109-108231028	0.723828397667253	-0.5250644938514	108643181569174	-0.483292633985581	0.628887969463255	0.999992923375272	NA	NA	NA	NA	NA	NA	NA
1:108226109-108247683	165481137263007	0.0772793754571813	0.290519048988798	0.266004503753422	0.790235740456841	0.999992923375272	hsa_circVAV3_003	hsa_circ_0110302	-	275	ANNOTATED, CDS, coding, INTERNAL, OVCODE, OVERLAPTX, OVEXON	ENST00000370056.4	VAV3
1:108226109-108293824	0.0808668925419646	-0.890893517090796	219522655476567	-0.405832152110558	0.684865932778388	0.999992923375272	NA	NA	NA	NA	NA	NA	NA
1:108226109-108298135	0.04298459544423	-0.779724047269722	295030259397491	-0.26428612741692	0.791559449090867	0.999992923375272	NA	NA	NA	NA	NA	NA	NA
1:108226109-108303501	0.0919654359630465	-0.707172421975828	230995130701502	-0.306141700835094	0.759496758494668	0.999992923375272	NA	NA	NA	NA	NA	NA	NA
1:108226109-108322114	0.125421181545705	0.0177784273352371	131141040055275	0.0135567228441559	0.989183631462482	0.999992923375272	NA	NA	NA	NA	NA	NA	NA
1:108226109-108417639	0.224390364233013	-0.322458734056395	129494516112229	-0.249013428319179	0.803350394234236	0.999992923375272	NA	NA	NA	NA	NA	NA	NA
1:108247171-108247683	0.583675186960374	-0.752254368173993	0.779508945210881	-0.965036222862697	0.334526669066836	0.999992923375272	NA	NA	NA	NA	NA	NA	NA
[truncated: 37,548 more rows]

## Sheet: Table S6_circRNA_TCF3PBX1
position	baseMean	log2FoldChange	lfcSE	stat	pvalue	padj	circBankID	circbaseID	strand	splicedSeqLength	annotation	bestTranscript	geneSymbol
[truncated: 9,443 more rows]

## Sheet: Table S7_patient_metadadata
TAG	sequencer	cohort	Sex	age at diagnosis years	blast purity	immunophenotype	Research Subtype
[truncated: 112 more rows]

[truncated: 1 more sheets: Table S8_primers_gRNAs]
